# Supplementary material for: Transcriptomic Regulation of Muscle Mitochondria and Calcium Signaling by Insulin/IGF-1 Receptors Depends on FoxO Transcription Factors
Source: Front Physiol. 2022 Feb 4;12:779121. doi: 10.3389/fphys.2021.779121 (PMC8855073; doi:10.3389/fphys.2021.779121)
Supplement: Supplementary file 2 [file Table_1.XLSX]

## Sheet: Sheet1
Supplemental Table1: Sheet 1- All identified and quantified genes across various muscle specific knock-outs
Ensembl ID	M-IR-/-.p	M-IR-/-.FDR	M-IR-/-.FC	M-IGF1R-/-.p	M-IGF1R-/-.FDR	M-IGF1R-/-.FC	MIGIRKO.p	MIGIRKO.FDR	MIGIRKO.FC	M-FoxO TKO.p	M-FoxO TKO.FDR	M-FoxO TKO.FC	M-QKO.p	M-QKO.FDR	M-QKO.FC	Gene	Description
ENSMUSG00000044378	0.000384	0.111	-12.4	0.00459	0.349	-3.61	1.38e-08	5.01e-06	-184	0.161	0.557	-2.17	0.55	0.955	-1.39	Slc15a5	solute carrier family 15, member 5 [Source:MGI Symbol;Acc:MGI:3607714]
ENSMUSG00000035963	0.0104	0.302	-8.33	0.00146	0.213	-9.13	2.09e-06	0.000142	-87.8	0.824	0.952	-1.09	0.127	0.917	-2.07	Odf3l2	outer dense fiber of sperm tails 3-like 2 [Source:MGI Symbol;Acc:MGI:2686003]
ENSMUSG00000000305	0.000141	0.0682	-9.94	0.0369	0.666	-2.48	4.52e-07	5.23e-05	-39.7	0.572	0.862	-1.22	0.725	0.974	1.17	Cdh4	cadherin 4 [Source:MGI Symbol;Acc:MGI:99218]
ENSMUSG00000026147	0.0875	0.512	-2.48	0.000198	0.0882	-5.76	1.82e-09	1.6e-06	-39.3	0.006	0.139	-3.31	0.00254	0.366	-3.81	Col9a1	collagen, type IX, alpha 1 [Source:MGI Symbol;Acc:MGI:88465]
ENSMUSG00000015312	1.99e-05	0.0226	-5.12	0.578	0.994	-1.19	0.0627	0.164	-1.79	0.906	0.975	-1.03	0.823	0.987	1.09	Gadd45b	growth arrest and DNA-damage-inducible 45 beta [Source:MGI Symbol;Acc:MGI:107776]
ENSMUSG00000025592	0.00973	0.294	-5.31	0.0294	0.633	-2.53	6.64e-07	6.76e-05	-32.8	0.0417	0.321	-2.96	0.219	0.918	-2.2	Dach2	dachshund 2 (Drosophila) [Source:MGI Symbol;Acc:MGI:1890446]
ENSMUSG00000085014	0.000297	0.0988	-6.31	0.00533	0.371	-2.99	1.09e-08	4.57e-06	-32.6	0.0244	0.26	-2.39	0.404	0.945	-1.45	Gm13490	predicted gene 13490 [Source:MGI Symbol;Acc:MGI:3650821]
ENSMUSG00000055138	0.0137	0.329	-4.03	0.102	0.826	-2.27	4.28e-07	5.07e-05	-30.9	0.349	0.737	-1.52	0.929	0.995	1.05	Gm4861	predicted gene 4861 [Source:MGI Symbol;Acc:MGI:3643777]
ENSMUSG00000021815	0.00246	0.199	-7.6	0.000626	0.149	-7.49	1.35e-07	2.14e-05	-28.5	0.155	0.548	-1.81	0.0381	0.903	-2.96	Mss51	MSS51 mitochondrial translational activator [Source:MGI Symbol;Acc:MGI:1922093]
ENSMUSG00000061877	7.23e-05	0.0462	-11.3	0.183	0.927	-2.05	1.79e-05	0.000643	-23.7	0.885	0.969	-1.07	0.932	0.995	1.07	BC048679	cDNA sequence BC048679 [Source:MGI Symbol;Acc:MGI:3510776]
ENSMUSG00000040046	2.19e-05	0.0233	-4	0.000199	0.0882	-3.04	0.163	0.314	-1.51	0.818	0.95	-1.09	0.377	0.941	1.48	Tph1	tryptophan hydroxylase 1 [Source:MGI Symbol;Acc:MGI:98796]
ENSMUSG00000048373	0.000103	0.0588	-12.8	0.00157	0.224	-5.62	6.53e-07	6.76e-05	-20.6	0.00303	0.1	7.13	0.004	0.431	-4.74	Fgfbp1	fibroblast growth factor binding protein 1 [Source:MGI Symbol;Acc:MGI:1096350]
ENSMUSG00000024105	1.2e-05	0.0207	-19.2	0.0152	0.523	-4.27	1.7e-06	0.000123	-19.4	0.0912	0.444	-3.01	0.0209	0.782	-4.71	Themis3	thymocyte selection associated family member 3 [Source:MGI Symbol;Acc:MGI:1921806]
ENSMUSG00000032033	0.000245	0.0889	-6.72	0.436	0.992	-1.28	4.49e-08	1.05e-05	-19.3	0.422	0.783	1.27	0.17	0.918	-1.73	Barx2	BarH-like homeobox 2 [Source:MGI Symbol;Acc:MGI:109617]
ENSMUSG00000046413	6.19e-06	0.0148	-11.9	0.0137	0.51	-2.7	3.28e-06	0.000186	-18.6	0.443	0.798	1.38	0.886	0.992	-1.08	Irx3os	iroquois homeobox 3, opposite strand [Source:MGI Symbol;Acc:MGI:2441953]
ENSMUSG00000056367	0.000646	0.14	-5.17	0.000191	0.0882	-4.23	7.49e-08	1.43e-05	-18.5	0.172	0.568	-1.56	0.00321	0.407	-3.43	Actr3b	ARP3 actin-related protein 3B [Source:MGI Symbol;Acc:MGI:2661120]
ENSMUSG00000098658	0.535	0.843	-1.47	0.396	0.992	-1.57	3.63e-05	0.00104	-16.2	0.0232	0.254	-3.62	0.23	0.918	-1.95	Mir6338	microRNA 6338 [Source:MGI Symbol;Acc:MGI:5531060]
ENSMUSG00000042903	0.429	0.789	-1.11	0.968	0.999	1	6.51e-05	0.00149	-1.68	2.12e-28	3.38e-24	-24.8	2.03e-25	3.25e-21	-23.8	Foxo4	forkhead box O4 [Source:MGI Symbol;Acc:MGI:1891915]
ENSMUSG00000045912	0.00861	0.287	-4.12	0.00553	0.373	-3.55	8.57e-08	1.5e-05	-15.3	0.986	0.997	-1.01	0.078	0.917	-2.19	C2cd4c	C2 calcium-dependent domain containing 4C [Source:MGI Symbol;Acc:MGI:2685084]
ENSMUSG00000026380	0.0783	0.499	-1.9	0.165	0.914	-1.48	1.99e-09	1.6e-06	-15	0.0725	0.401	-1.67	0.000773	0.202	-3.3	Tfcp2l1	transcription factor CP2-like 1 [Source:MGI Symbol;Acc:MGI:2444691]
ENSMUSG00000086863	0.243	0.674	-1.94	0.847	0.998	1.09	1.31e-05	0.000524	-14.7	0.732	0.918	-1.17	0.447	0.948	1.76	Gm15543	predicted gene 15543 [Source:MGI Symbol;Acc:MGI:3782992]
ENSMUSG00000045246	4.6e-05	0.0328	-4.69	0.469	0.992	-1.24	1.02e-09	1.08e-06	-14.1	0.813	0.949	-1.07	0.842	0.988	-1.07	Kcng4	potassium voltage-gated channel, subfamily G, member 4 [Source:MGI Symbol;Acc:MGI:1913983]
ENSMUSG00000034127	0.0563	0.463	-2	0.00264	0.27	-2.66	0.000242	0.00374	-3.62	4.65e-10	1.24e-06	-15.2	1.35e-07	0.000309	-12.6	Tspan8	tetraspanin 8 [Source:MGI Symbol;Acc:MGI:2384918]
ENSMUSG00000026156	1.4e-05	0.0207	9.58	0.214	0.942	1.45	0.85	0.915	-1.06	0.55	0.851	1.22	0.914	0.994	1.05	B3gat2	beta-1,3-glucuronyltransferase 2 (glucuronosyltransferase S) [Source:MGI Symbol;Acc:MGI:2389490]
ENSMUSG00000027547	0.0333	0.406	-2.71	0.512	0.994	-1.27	3.62e-08	9.25e-06	-13.5	0.0849	0.431	-1.83	0.36	0.94	-1.54	Sall4	sal-like 4 (Drosophila) [Source:MGI Symbol;Acc:MGI:2139360]
ENSMUSG00000028836	0.000189	0.0787	-3.69	1e-05	0.0178	-3.34	6.38e-12	3.74e-08	-13	0.021	0.244	-1.72	0.0234	0.812	-1.89	Slc30a2	solute carrier family 30 (zinc transporter), member 2 [Source:MGI Symbol;Acc:MGI:106637]
ENSMUSG00000061728	0.0312	0.397	3.63	0.00122	0.196	3.69	0.000886	0.00895	4.16	3.37e-06	0.00138	-12	0.000522	0.195	-8.32	Btnl7-ps	butyrophilin-like 7, pseudogene [Source:MGI Symbol;Acc:MGI:2388054]
ENSMUSG00000103460	0.113	0.543	-2.08	0.00189	0.226	-2.85	7.72e-10	8.8e-07	-12.5	0.633	0.885	1.21	0.995	1	-1	Gm18491	predicted gene, 18491 [Source:MGI Symbol;Acc:MGI:5010676]
ENSMUSG00000039095	0.0254	0.376	-3.16	0.0822	0.801	-2.24	1.64e-06	0.000121	-12.4	0.0356	0.302	-2.01	0.589	0.955	1.32	En2	engrailed 2 [Source:MGI Symbol;Acc:MGI:95390]
ENSMUSG00000070498	0.195	0.631	-3.15	0.0731	0.772	-3.35	0.0011	0.0103	-12.2	0.849	0.958	1.09	0.823	0.987	-1.17	Tmem132b	transmembrane protein 132B [Source:MGI Symbol;Acc:MGI:3609245]
ENSMUSG00000052276	0.00318	0.218	-6.15	0.00129	0.199	-5.39	5.52e-05	0.00134	-11.5	0.592	0.871	-1.23	0.312	0.935	-1.72	Ostn	osteocrin [Source:MGI Symbol;Acc:MGI:2677164]
ENSMUSG00000100855	0.000156	0.0707	-7.37	0.347	0.99	-1.41	0.0129	0.0549	-3.03	0.407	0.776	-1.44	0.00041	0.177	-4.74	Gm6976	predicted gene 6976 [Source:MGI Symbol;Acc:MGI:3644617]
ENSMUSG00000019836	0.00337	0.221	-5.63	0.0387	0.676	-2.63	2.03e-05	0.000702	-11	0.244	0.65	-1.72	0.00267	0.372	-4.68	Amd-ps4	S-adenosylmethionine decarboxylase, pseudogene 4 [Source:MGI Symbol;Acc:MGI:3650439]
ENSMUSG00000029671	0.127	0.559	-2.26	0.0613	0.744	-2.49	3.29e-06	0.000186	-10.7	0.0153	0.214	-2.99	0.043	0.91	-2.81	Wnt16	wingless-type MMTV integration site family, member 16 [Source:MGI Symbol;Acc:MGI:2136018]
ENSMUSG00000034623	0.00019	0.0787	-9.41	0.757	0.998	-1.19	0.682	0.804	-1.3	0.0806	0.421	-1.96	0.0136	0.681	-2.89	Prss55	protease, serine 55 [Source:MGI Symbol;Acc:MGI:1918287]
ENSMUSG00000034584	0.158	0.594	-1.96	0.483	0.993	-1.37	3.36e-07	4.26e-05	-10.4	0.0135	0.202	-3.15	0.708	0.971	1.28	Exph5	exophilin 5 [Source:MGI Symbol;Acc:MGI:2443248]
ENSMUSG00000019828	0.207	0.643	-1.81	0.928	0.998	-1.03	5.42e-06	0.000268	-9.93	0.854	0.959	-1.09	0.221	0.918	-1.86	Grm1	glutamate receptor, metabotropic 1 [Source:MGI Symbol;Acc:MGI:1351338]
ENSMUSG00000085888	0.00134	0.18	-3.07	0.149	0.896	-1.51	9.89e-09	4.27e-06	-9.9	0.404	0.773	-1.23	0.139	0.917	-1.59	Gm12224	predicted gene 12224 [Source:MGI Symbol;Acc:MGI:3651369]
ENSMUSG00000101304	0.448	0.8	1.27	0.0528	0.723	1.7	0.503	0.664	1.2	1.91e-06	0.000983	-9.32	0.000129	0.103	-6.3	Plet1os	placenta expressed transcript 1, opposite strand [Source:MGI Symbol;Acc:MGI:1916881]
ENSMUSG00000054958	0.0139	0.329	-2.61	0.461	0.992	-1.24	1e-06	9.01e-05	-9.52	0.44	0.796	1.26	0.974	0.999	-1.01	Nt5c1a	5'-nucleotidase, cytosolic IA [Source:MGI Symbol;Acc:MGI:2155700]
ENSMUSG00000046500	0.0011	0.173	-4.6	0.00437	0.343	-3.49	2.72e-05	0.000869	-9.39	0.00519	0.129	-2.9	0.0479	0.916	-2.7	Fam19a4	family with sequence similarity 19, member A4 [Source:MGI Symbol;Acc:MGI:2444563]
ENSMUSG00000041798	0.0236	0.37	-3.28	0.104	0.83	-1.89	1.74e-05	0.000636	-9.39	0.269	0.67	1.44	0.532	0.955	-1.3	Gck	glucokinase [Source:MGI Symbol;Acc:MGI:1270854]
ENSMUSG00000103114	0.00171	0.188	-4.09	0.0106	0.467	-2.68	1.23e-06	9.71e-05	-9.23	0.782	0.937	1.09	0.632	0.959	1.24	Gm32200	predicted gene, 32200 [Source:MGI Symbol;Acc:MGI:5591359]
ENSMUSG00000026888	9.08e-06	0.0181	-4.09	0.0609	0.744	-1.53	3.52e-10	4.32e-07	-9	0.0027	0.0946	1.86	0.856	0.989	-1.05	Grb14	growth factor receptor bound protein 14 [Source:MGI Symbol;Acc:MGI:1355324]
ENSMUSG00000060096	0.0356	0.409	-2.99	0.192	0.931	-1.79	5.95e-05	0.00141	-8.8	0.953	0.989	1.03	0.00928	0.595	-3.71	Amd-ps3	S-adenosylmethionine decarboxylase, pseudogene 3 [Source:MGI Symbol;Acc:MGI:3704487]
ENSMUSG00000057913	0.894	0.975	-1.11	0.0983	0.819	-2.31	0.000159	0.0028	-8.57	0.809	0.949	-1.16	0.209	0.918	-2.5	Gm10032	predicted gene 10032 [Source:MGI Symbol;Acc:MGI:3642901]
ENSMUSG00000062778	0.0435	0.429	-2.7	0.717	0.998	-1.14	3.24e-06	0.000185	-8.44	0.00152	0.0701	-4.42	0.0158	0.721	-3.39	Chia1	chitinase, acidic 1 [Source:MGI Symbol;Acc:MGI:1932052]
ENSMUSG00000059741	0.0333	0.406	-2.8	0.481	0.993	-1.36	3.62e-05	0.00103	-8.43	0.437	0.795	-1.36	0.111	0.917	2.29	Myl3	myosin, light polypeptide 3 [Source:MGI Symbol;Acc:MGI:97268]
ENSMUSG00000053166	0.052	0.453	-3.62	0.106	0.835	-2.58	0.000389	0.00516	-8.42	0.609	0.877	1.28	0.955	0.997	-1.04	Cdh22	cadherin 22 [Source:MGI Symbol;Acc:MGI:1341843]
ENSMUSG00000103476	0.249	0.675	-2.04	0.00514	0.368	-4.2	8.81e-05	0.00183	-8.15	0.862	0.961	-1.06	0.145	0.918	2.12	Gm34302	predicted gene, 34302 [Source:MGI Symbol;Acc:MGI:5593461]
ENSMUSG00000034472	0.0115	0.314	-3.02	0.112	0.85	-1.94	1.79e-05	0.000643	-8.03	0.00645	0.144	-2.96	0.0114	0.633	-3.5	Rasd2	RASD family, member 2 [Source:MGI Symbol;Acc:MGI:1922391]
ENSMUSG00000027827	0.021	0.356	-2.56	0.000105	0.0696	-4.69	5.4e-07	5.94e-05	-5.81	8.32e-08	6.99e-05	-8.96	3.64e-06	0.00528	-7.97	Kcnab1	potassium voltage-gated channel, shaker-related subfamily, beta member 1 [Source:MGI Symbol;Acc:MGI:109155]
ENSMUSG00000026100	0.00354	0.221	-2.76	0.00805	0.416	-2.2	4.48e-08	1.05e-05	-7.74	0.0524	0.351	-1.71	0.429	0.946	-1.31	Mstn	myostatin [Source:MGI Symbol;Acc:MGI:95691]
ENSMUSG00000053279	6.47e-06	0.0148	-4	0.0105	0.467	-1.89	2.26e-10	3e-07	-7.67	0.016	0.218	1.77	0.72	0.972	-1.11	Aldh1a1	aldehyde dehydrogenase family 1, subfamily A1 [Source:MGI Symbol;Acc:MGI:1353450]
ENSMUSG00000015843	0.00115	0.173	-2.8	0.349	0.99	-1.28	7.09e-09	3.59e-06	-7.46	0.903	0.973	-1.03	0.715	0.971	-1.12	Rxrg	retinoid X receptor gamma [Source:MGI Symbol;Acc:MGI:98216]
ENSMUSG00000038204	0.00324	0.218	-2.6	0.126	0.866	-1.52	9.03e-09	4.01e-06	-7.4	0.103	0.464	-1.54	0.192	0.918	-1.53	Asb10	ankyrin repeat and SOCS box-containing 10 [Source:MGI Symbol;Acc:MGI:2152836]
ENSMUSG00000044951	0.00361	0.221	-2.9	0.0593	0.74	-1.83	1.53e-07	2.3e-05	-7.28	0.0413	0.319	-1.87	0.049	0.917	-2.14	Mylk4	myosin light chain kinase family, member 4 [Source:MGI Symbol;Acc:MGI:3643758]
ENSMUSG00000085411	0.00145	0.183	-4.04	0.00243	0.26	-2.67	1.16e-06	9.51e-05	-7.24	0.451	0.802	-1.21	0.122	0.917	-1.71	Gm14319	predicted gene 14319 [Source:MGI Symbol;Acc:MGI:3649450]
ENSMUSG00000044499	0.0358	0.41	-2.48	0.132	0.872	-1.69	1.66e-05	0.000615	-7.18	0.0325	0.291	-2.18	0.0474	0.914	-2.25	Hs3st5	heparan sulfate (glucosamine) 3-O-sulfotransferase 5 [Source:MGI Symbol;Acc:MGI:2441996]
ENSMUSG00000085691	0.00106	0.173	-6.38	0.311	0.985	-1.87	0.000553	0.00654	-7.16	0.244	0.651	-1.72	0.839	0.988	1.15	Gm14216	predicted gene 14216 [Source:MGI Symbol;Acc:MGI:3650218]
ENSMUSG00000037406	0.592	0.867	-1.31	6.7e-05	0.0629	-7.12	0.0476	0.135	-2.11	0.000384	0.0333	-7.32	0.0161	0.723	-4.19	Htra4	HtrA serine peptidase 4 [Source:MGI Symbol;Acc:MGI:3036260]
ENSMUSG00000020623	6.24e-06	0.0148	-3.16	0.158	0.906	-1.32	7.03e-12	3.74e-08	-6.98	0.564	0.858	-1.12	0.808	0.986	-1.06	Map2k6	mitogen-activated protein kinase kinase 6 [Source:MGI Symbol;Acc:MGI:1346870]
ENSMUSG00000048939	0.000441	0.113	-2.86	0.000625	0.149	-2.39	1.11e-11	4.44e-08	-6.92	0.041	0.319	-1.64	0.183	0.918	-1.48	Atp13a5	ATPase type 13A5 [Source:MGI Symbol;Acc:MGI:2444068]
ENSMUSG00000085322	0.0424	0.428	-3.07	0.645	0.997	-1.23	8.45e-05	0.00177	-6.88	0.143	0.532	-1.85	0.164	0.918	-1.96	Gm14261	predicted gene 14261 [Source:MGI Symbol;Acc:MGI:3649583]
ENSMUSG00000078183	0.597	0.869	-1.78	0.592	0.995	1.5	0.00417	0.0249	-6.81	0.269	0.67	2.04	0.958	0.997	-1.05	Gm15610	predicted gene 15610 [Source:MGI Symbol;Acc:MGI:3783056]
ENSMUSG00000074215	0.000565	0.127	-4.71	0.955	0.998	-1.02	0.0853	0.201	-2	0.524	0.84	-1.24	0.867	0.99	1.08	Gm10643	predicted gene 10643 [Source:MGI Symbol;Acc:MGI:3642507]
ENSMUSG00000029343	0.000779	0.149	-8.6	0.282	0.974	1.77	0.00222	0.0162	-6.78	0.000849	0.0527	4.47	0.0313	0.857	5.05	Crybb1	crystallin, beta B1 [Source:MGI Symbol;Acc:MGI:104992]
ENSMUSG00000022041	0.0171	0.339	-3.39	0.387	0.991	-1.38	0.000423	0.00546	-6.76	0.514	0.835	-1.35	0.546	0.955	-1.38	Chrna2	cholinergic receptor, nicotinic, alpha polypeptide 2 (neuronal) [Source:MGI Symbol;Acc:MGI:87886]
ENSMUSG00000025754	0.00509	0.244	-3.21	0.605	0.995	-1.17	1.71e-05	0.000628	-6.7	0.338	0.726	-1.34	0.135	0.917	-1.84	Agbl1	ATP/GTP binding protein-like 1 [Source:MGI Symbol;Acc:MGI:3646469]
ENSMUSG00000095306	0.0501	0.451	-2.11	0.287	0.974	-1.38	2.6e-06	0.000162	-6.67	0.0852	0.431	-1.85	0.802	0.985	1.11	Gm21807	predicted gene, 21807 [Source:MGI Symbol;Acc:MGI:5433971]
ENSMUSG00000087108	0.87	0.968	-1.14	0.0495	0.714	-3.08	0.00712	0.0363	-6.59	0.0342	0.297	-3.64	0.273	0.925	-2.26	Gm16093	predicted gene 16093 [Source:MGI Symbol;Acc:MGI:3801946]
ENSMUSG00000035849	0.0106	0.304	-2.79	0.767	0.998	1.11	4.69e-05	0.00121	-6.43	0.45	0.802	1.25	0.483	0.95	-1.31	Krt222	keratin 222 [Source:MGI Symbol;Acc:MGI:2442728]
ENSMUSG00000060843	0.00131	0.178	-2.82	0.00148	0.215	-2.43	6.08e-08	1.28e-05	-6.33	0.107	0.469	-1.48	0.355	0.94	-1.35	Ctnna3	catenin (cadherin associated protein), alpha 3 [Source:MGI Symbol;Acc:MGI:2661445]
ENSMUSG00000022525	0.00106	0.173	-2.6	0.217	0.944	-1.34	5.17e-09	2.95e-06	-6.32	0.234	0.64	-1.32	0.149	0.918	-1.52	Hrasls	HRAS-like suppressor [Source:MGI Symbol;Acc:MGI:1351473]
ENSMUSG00000025993	0.00144	0.183	-2.74	0.05	0.714	-1.67	3.53e-08	9.23e-06	-6.26	0.00358	0.106	-2.55	0.000206	0.127	-4.03	Slc40a1	solute carrier family 40 (iron-regulated transporter), member 1 [Source:MGI Symbol;Acc:MGI:1315204]
ENSMUSG00000040205	0.0584	0.467	-2.35	0.587	0.994	1.22	9.13e-05	0.00187	-6.24	0.937	0.983	1.03	0.83	0.987	-1.09	Cuzd1	CUB and zona pellucida-like domains 1 [Source:MGI Symbol;Acc:MGI:1202881]
ENSMUSG00000025777	0.0204	0.356	-2.85	0.192	0.931	-1.59	5.08e-05	0.00126	-6.23	0.113	0.481	-1.79	0.523	0.953	-1.32	Gdap1	ganglioside-induced differentiation-associated-protein 1 [Source:MGI Symbol;Acc:MGI:1338002]
ENSMUSG00000041669	0.0693	0.491	-3.23	0.0511	0.719	-2.71	0.000779	0.00819	-6.2	0.995	0.999	-1	0.483	0.95	-1.38	Prima1	proline rich membrane anchor 1 [Source:MGI Symbol;Acc:MGI:1926097]
ENSMUSG00000036932	0.000786	0.149	-1.74	0.674	0.998	-1.06	0.0234	0.0831	-1.39	0.484	0.82	-1.1	0.361	0.94	1.17	Aifm1	apoptosis-inducing factor, mitochondrion-associated 1 [Source:MGI Symbol;Acc:MGI:1349419]
ENSMUSG00000076617	0.00127	0.178	-3.92	0.742	0.998	1.12	1.63e-05	0.000608	-6.19	0.815	0.95	1.08	0.78	0.981	1.13	Ighm	immunoglobulin heavy constant mu [Source:MGI Symbol;Acc:MGI:96448]
ENSMUSG00000000948	0.0287	0.39	-4.19	0.989	0.999	1.01	0.0022	0.0161	-6.18	0.0713	0.4	-2.69	0.619	0.957	1.45	Gm38393	predicted gene, 38393 [Source:MGI Symbol;Acc:MGI:5613898]
ENSMUSG00000021898	0.00435	0.23	-2.59	0.0416	0.689	-1.79	2.19e-07	3.13e-05	-5.97	0.00133	0.0652	-2.53	0.0313	0.857	-2.1	Asb14	ankyrin repeat and SOCS box-containing 14 [Source:MGI Symbol;Acc:MGI:2655107]
ENSMUSG00000097791	0.503	0.827	1.59	0.533	0.994	-1.39	0.0018	0.0142	-5.92	0.142	0.531	-2.12	0.473	0.949	-1.51	Gm17315	predicted gene, 17315 [Source:MGI Symbol;Acc:MGI:4936949]
ENSMUSG00000059751	0.56	0.854	2.95	0.373	0.991	1.75	0.00238	0.0169	-5.83	0.76	0.929	1.15	0.596	0.955	1.38	Rps3a3	ribosomal protein S3A3 [Source:MGI Symbol;Acc:MGI:3643406]
ENSMUSG00000026773	0.888	0.973	1.06	0.0256	0.619	2.18	0.69	0.81	1.15	2.1e-07	0.000168	-7.19	0.00672	0.537	-3.1	Pfkfb3	6-phosphofructo-2-kinase/fructose-2,6-biphosphatase 3 [Source:MGI Symbol;Acc:MGI:2181202]
ENSMUSG00000046828	0.0109	0.308	-5.07	0.141	0.886	-2.01	0.0018	0.0142	-5.77	0.077	0.413	-2.22	0.412	0.945	-1.59	Mettl21e	methyltransferase like 21E [Source:MGI Symbol;Acc:MGI:2685837]
ENSMUSG00000028013	0.000984	0.169	-1.94	0.967	0.999	1.01	0.0124	0.0534	-1.57	0.402	0.773	-1.14	0.744	0.977	1.07	Ppa2	pyrophosphatase (inorganic) 2 [Source:MGI Symbol;Acc:MGI:1922026]
ENSMUSG00000055003	0.111	0.541	-2.38	0.107	0.838	-2.08	0.000206	0.00338	-5.74	0.595	0.872	1.19	0.176	0.918	1.81	Lrtm2	leucine-rich repeats and transmembrane domains 2 [Source:MGI Symbol;Acc:MGI:2141485]
ENSMUSG00000086935	0.488	0.821	-1.57	0.337	0.989	1.7	0.000719	0.00776	-5.73	0.926	0.981	-1.05	0.000745	0.202	-6.13	Gm15956	predicted gene 15956 [Source:MGI Symbol;Acc:MGI:3801856]
ENSMUSG00000084883	0.00147	0.183	-2.76	0.611	0.995	-1.13	8.11e-09	3.7e-06	-5.7	0.354	0.741	-1.24	0.427	0.946	-1.26	Ccdc85c	coiled-coil domain containing 85C [Source:MGI Symbol;Acc:MGI:3644008]
ENSMUSG00000019933	0.00345	0.221	-2.46	0.0288	0.627	-1.76	4.49e-08	1.05e-05	-5.7	0.0104	0.178	-1.89	0.445	0.948	-1.27	Mrln	myoregulin [Source:MGI Symbol;Acc:MGI:1916813]
ENSMUSG00000013936	0.00655	0.266	-2.8	0.0617	0.745	-1.91	8.29e-06	0.000364	-5.69	0.118	0.491	-1.62	0.0634	0.917	2.1	Myl2	myosin, light polypeptide 2, regulatory, cardiac, slow [Source:MGI Symbol;Acc:MGI:97272]
ENSMUSG00000090185	0.25	0.676	1.63	0.517	0.994	1.28	2.3e-06	0.00015	-5.69	0.983	0.996	-1.01	0.781	0.981	-1.12	Gm15523	predicted gene 15523 [Source:MGI Symbol;Acc:MGI:3782970]
ENSMUSG00000023987	0.226	0.66	-2.05	0.255	0.963	1.87	0.00118	0.0108	-5.64	0.107	0.469	2.13	0.399	0.944	1.65	Pgc	progastricsin (pepsinogen C) [Source:MGI Symbol;Acc:MGI:98909]
ENSMUSG00000029168	0.717	0.915	-1.19	0.538	0.994	-1.2	0.045	0.13	-2.22	3.25e-06	0.00136	-6.84	0.000487	0.194	-5.68	Dpysl5	dihydropyrimidinase-like 5 [Source:MGI Symbol;Acc:MGI:1929772]
ENSMUSG00000036611	0.0164	0.338	-2.07	0.126	0.866	-1.49	7.92e-08	1.45e-05	-5.57	0.0454	0.333	-1.66	0.042	0.91	-1.89	Eepd1	endonuclease/exonuclease/phosphatase family domain containing 1 [Source:MGI Symbol;Acc:MGI:1914734]
ENSMUSG00000031147	0.00926	0.292	-2.56	0.338	0.99	-1.32	1.31e-06	0.000101	-5.55	0.104	0.466	-1.53	0.345	0.939	-1.38	Magix	MAGI family member, X-linked [Source:MGI Symbol;Acc:MGI:1859644]
ENSMUSG00000105973	0.399	0.772	-1.62	0.0432	0.7	-2.87	0.000768	0.0081	-5.55	0.145	0.535	-2.15	0.135	0.917	-2.35	Gm42881	predicted gene 42881 [Source:MGI Symbol;Acc:MGI:5663018]
ENSMUSG00000018893	0.000612	0.136	-3.25	0.657	0.998	-1.14	6.93e-07	6.86e-05	-5.51	0.783	0.937	1.08	0.864	0.99	1.06	Mb	myoglobin [Source:MGI Symbol;Acc:MGI:96922]
ENSMUSG00000029685	0.00252	0.199	-2.07	0.167	0.918	1.33	2.03e-10	2.96e-07	-5.5	0.491	0.825	-1.14	0.0755	0.917	-1.55	Asb15	ankyrin repeat and SOCS box-containing 15 [Source:MGI Symbol;Acc:MGI:1926160]
ENSMUSG00000091996	0.000363	0.109	-6.66	0.0679	0.764	-2.44	0.00123	0.011	-5.48	0.309	0.703	1.62	0.534	0.955	1.49	BC049352	cDNA sequence BC049352 [Source:MGI Symbol;Acc:MGI:3040681]
ENSMUSG00000026904	0.0664	0.485	-2.56	0.0203	0.578	-2.77	0.000307	0.00443	-5.45	0.289	0.688	-1.6	0.121	0.917	-2.45	Slc4a10	solute carrier family 4, sodium bicarbonate cotransporter-like, member 10 [Source:MGI Symbol;Acc:MGI:2150150]
ENSMUSG00000034387	0.00118	0.173	-4.65	0.683	0.998	-1.15	0.805	0.887	1.09	0.733	0.918	1.12	0.00746	0.55	-2.89	Ssu2	ssu-2 homolog (C. elegans) [Source:MGI Symbol;Acc:MGI:2443733]
ENSMUSG00000102805	0.177	0.613	1.98	0.808	0.998	-1.12	0.000478	0.00591	-5.45	0.923	0.979	1.04	0.949	0.996	1.03	Gm37240	predicted gene, 37240 [Source:MGI Symbol;Acc:MGI:5610468]
ENSMUSG00000051726	0.153	0.59	-2.21	0.0831	0.802	-2.39	0.000148	0.00266	-5.29	0.112	0.479	-2.26	0.133	0.917	-2.26	Kcnf1	potassium voltage-gated channel, subfamily F, member 1 [Source:MGI Symbol;Acc:MGI:2687399]
ENSMUSG00000087381	0.00123	0.176	4.33	0.0439	0.701	2.25	0.174	0.329	1.59	0.591	0.87	1.21	0.66	0.963	1.23	Gm16008	predicted gene 16008 [Source:MGI Symbol;Acc:MGI:3802048]
ENSMUSG00000042377	0.00124	0.176	4.76	0.0115	0.47	2.95	0.109	0.238	1.82	0.0107	0.181	2.69	0.749	0.978	1.17	Fam83g	family with sequence similarity 83, member G [Source:MGI Symbol;Acc:MGI:1916890]
ENSMUSG00000067279	0.425	0.787	-1.26	0.000474	0.135	-2.61	1.82e-07	2.69e-05	-5.25	0.732	0.918	-1.09	0.108	0.917	-1.68	Ppp1r3c	protein phosphatase 1, regulatory (inhibitor) subunit 3C [Source:MGI Symbol;Acc:MGI:1858229]
ENSMUSG00000031637	0.00154	0.185	-3.33	0.021	0.583	-2.2	0.000128	0.00238	-5.22	0.307	0.702	-1.38	0.894	0.993	1.06	Lrp2bp	Lrp2 binding protein [Source:MGI Symbol;Acc:MGI:1914870]
ENSMUSG00000035459	0.449	0.8	-1.57	0.364	0.991	-1.75	7.29e-05	0.00161	-5.21	0.658	0.893	-1.29	0.707	0.971	-1.32	Stab2	stabilin 2 [Source:MGI Symbol;Acc:MGI:2178743]
ENSMUSG00000021200	0.0175	0.339	-1.71	0.504	0.994	-1.14	2.04e-10	2.96e-07	-5.2	0.178	0.576	-1.3	0.084	0.917	-1.51	Asb2	ankyrin repeat and SOCS box-containing 2 [Source:MGI Symbol;Acc:MGI:1929743]
ENSMUSG00000011267	0.00134	0.18	-4.98	0.0819	0.801	-2.08	0.62	0.758	-1.23	0.328	0.717	-1.4	0.574	0.955	1.32	Zfp296	zinc finger protein 296 [Source:MGI Symbol;Acc:MGI:1926956]
ENSMUSG00000021255	0.00262	0.199	-2.64	0.931	0.998	-1.02	3.96e-07	4.87e-05	-5.12	0.984	0.997	-1.01	0.425	0.946	1.28	Esrrb	estrogen related receptor, beta [Source:MGI Symbol;Acc:MGI:1346832]
ENSMUSG00000020333	0.018	0.339	-1.92	0.182	0.927	-1.37	3.34e-08	8.88e-06	-5.11	0.944	0.986	1.02	0.679	0.966	-1.12	Acsl6	acyl-CoA synthetase long-chain family member 6 [Source:MGI Symbol;Acc:MGI:894291]
ENSMUSG00000010592	0.0643	0.481	-3.05	0.881	0.998	1.07	0.00281	0.019	-5.11	0.965	0.991	1.02	0.771	0.98	-1.15	Dazl	deleted in azoospermia-like [Source:MGI Symbol;Acc:MGI:1342328]
ENSMUSG00000045667	0.0298	0.392	-1.73	0.0596	0.741	-1.52	5.02e-09	2.95e-06	-5.09	0.53	0.842	-1.14	0.54	0.955	-1.17	Smtnl2	smoothelin-like 2 [Source:MGI Symbol;Acc:MGI:2442764]
ENSMUSG00000084819	0.00355	0.221	-3.1	0.802	0.998	-1.08	3.46e-05	0.00101	-5.05	0.125	0.502	1.55	0.61	0.956	1.23	Gm11967	predicted gene 11967 [Source:MGI Symbol;Acc:MGI:3650297]
ENSMUSG00000046598	0.0035	0.221	-2.46	0.573	0.994	-1.15	4.77e-07	5.4e-05	-5.03	0.0733	0.403	-1.58	0.386	0.942	1.31	Bdh1	3-hydroxybutyrate dehydrogenase, type 1 [Source:MGI Symbol;Acc:MGI:1919161]
ENSMUSG00000054477	4.72e-05	0.0328	-4.1	0.163	0.91	-1.42	1.42e-06	0.000106	-5.02	0.117	0.488	1.65	0.451	0.948	-1.28	Kcnn2	potassium intermediate/small conductance calcium-activated channel, subfamily N, member 2 [Source:MGI Symbol;Acc:MGI:2153182]
ENSMUSG00000055214	0.149	0.587	-1.9	0.017	0.53	-2.64	0.000127	0.00237	-5.01	0.0332	0.293	2.55	0.356	0.94	1.63	Pld5	phospholipase D family, member 5 [Source:MGI Symbol;Acc:MGI:2442056]
ENSMUSG00000058070	0.00109	0.173	-2.67	0.187	0.928	-1.39	1.57e-07	2.35e-05	-4.99	0.871	0.964	-1.04	0.71	0.971	-1.12	Eml1	echinoderm microtubule associated protein like 1 [Source:MGI Symbol;Acc:MGI:1915769]
ENSMUSG00000035606	0.0174	0.339	-3.09	0.82	0.998	-1.1	0.000389	0.00516	-4.97	0.639	0.888	-1.2	0.852	0.988	-1.09	Ky	kyphoscoliosis peptidase [Source:MGI Symbol;Acc:MGI:96709]
ENSMUSG00000063275	0.00151	0.185	-2.56	0.916	0.998	1.03	0.0198	0.0742	-1.89	0.902	0.973	-1.03	0.312	0.935	1.38	Hacd1	3-hydroxyacyl-CoA dehydratase 1 [Source:MGI Symbol;Acc:MGI:1353592]
ENSMUSG00000033044	0.0226	0.365	-2.21	0.197	0.934	-1.47	5.69e-06	0.000277	-4.95	0.712	0.911	-1.11	0.939	0.996	1.03	Dhrs7c	dehydrogenase/reductase (SDR family) member 7C [Source:MGI Symbol;Acc:MGI:1915710]
ENSMUSG00000054978	0.000546	0.126	-2.5	0.193	0.931	-1.32	1.22e-08	5.01e-06	-4.94	0.0445	0.33	-1.55	0.203	0.918	-1.41	Kbtbd13	kelch repeat and BTB (POZ) domain containing 13 [Source:MGI Symbol;Acc:MGI:1921742]
ENSMUSG00000024134	0.0366	0.413	-1.9	0.216	0.942	-1.46	8.42e-08	1.49e-05	-4.92	0.306	0.702	-1.3	0.436	0.946	-1.29	Six2	sine oculis-related homeobox 2 [Source:MGI Symbol;Acc:MGI:102778]
ENSMUSG00000027333	0.0635	0.478	-2.1	0.0405	0.682	-2.07	6.81e-05	0.00154	-4.91	0.00248	0.0912	-2.88	0.119	0.917	-1.92	Smox	spermine oxidase [Source:MGI Symbol;Acc:MGI:2445356]
ENSMUSG00000050592	0.00223	0.199	-2.86	0.681	0.998	-1.12	2.97e-06	0.000178	-4.9	0.122	0.497	1.48	0.969	0.998	1.01	Fam78a	family with sequence similarity 78, member A [Source:MGI Symbol;Acc:MGI:2443569]
ENSMUSG00000046345	0.00289	0.204	-3.02	0.611	0.995	-1.17	1.74e-05	0.000636	-4.88	0.248	0.654	-1.41	0.915	0.994	1.04	Smco1	single-pass membrane protein with coiled-coil domains 1 [Source:MGI Symbol;Acc:MGI:1916826]
ENSMUSG00000039481	0.0632	0.478	-2.99	0.96	0.998	-1.03	0.00195	0.015	-4.87	0.112	0.479	-2.13	0.27	0.925	-2	Nrtn	neurturin [Source:MGI Symbol;Acc:MGI:108417]
ENSMUSG00000034353	0.00316	0.218	-4.94	0.63	0.997	-1.21	0.00103	0.00994	-4.78	0.785	0.938	-1.11	0.661	0.963	1.26	Ramp1	receptor (calcitonin) activity modifying protein 1 [Source:MGI Symbol;Acc:MGI:1858418]
ENSMUSG00000032114	0.00524	0.245	-2.03	0.0236	0.604	-1.64	7.98e-09	3.7e-06	-4.77	0.949	0.987	-1.01	0.737	0.977	-1.09	Slc37a4	solute carrier family 37 (glucose-6-phosphate transporter), member 4 [Source:MGI Symbol;Acc:MGI:1316650]
ENSMUSG00000050821	0.0229	0.365	-2.38	0.17	0.923	-1.57	3.93e-05	0.00109	-4.72	0.082	0.424	-1.74	0.218	0.918	-1.62	Fam131a	family with sequence similarity 131, member A [Source:MGI Symbol;Acc:MGI:1925658]
ENSMUSG00000100775	0.00167	0.188	-7.2	0.15	0.898	2.11	0.186	0.344	-1.94	0.116	0.485	-2.05	0.149	0.918	2.72	Gm29107	predicted gene 29107 [Source:MGI Symbol;Acc:MGI:5579813]
ENSMUSG00000025425	0.00675	0.267	-2.23	0.136	0.877	-1.48	6.87e-07	6.86e-05	-4.7	0.54	0.845	-1.14	0.689	0.968	-1.12	St8sia5	ST8 alpha-N-acetyl-neuraminide alpha-2,8-sialyltransferase 5 [Source:MGI Symbol;Acc:MGI:109243]
ENSMUSG00000043488	0.287	0.706	-1.64	0.244	0.956	-1.55	7e-05	0.00157	-4.68	0.643	0.888	-1.17	0.204	0.918	-1.74	Frmd8os	FERM domain containing 8, opposite strand [Source:MGI Symbol;Acc:MGI:3704490]
ENSMUSG00000023968	0.926	0.984	1.04	0.0331	0.648	-2.07	0.000166	0.00287	-4.67	0.15	0.541	1.67	0.121	0.917	2.2	Crip3	cysteine-rich protein 3 [Source:MGI Symbol;Acc:MGI:2152434]
ENSMUSG00000036304	1.91e-05	0.0226	-5.4	0.261	0.963	-1.37	3.56e-06	0.000197	-4.65	0.00797	0.158	-2.02	0.413	0.945	-1.32	Zdhhc23	zinc finger, DHHC domain containing 23 [Source:MGI Symbol;Acc:MGI:2685625]
ENSMUSG00000050777	0.216	0.649	-1.61	0.27	0.968	-1.52	2.73e-05	0.000871	-4.64	0.143	0.533	-1.55	0.261	0.924	-1.5	Tmem37	transmembrane protein 37 [Source:MGI Symbol;Acc:MGI:2157899]
ENSMUSG00000086527	0.593	0.868	1.24	0.256	0.963	-1.44	6.31e-05	0.00146	-4.62	0.302	0.698	1.38	0.861	0.99	-1.07	Gm15856	predicted gene 15856 [Source:MGI Symbol;Acc:MGI:3801888]
ENSMUSG00000025380	0.0617	0.473	-2.64	0.00171	0.226	-3.87	0.000701	0.00763	-4.28	3.24e-05	0.0069	-6.81	0.331	0.938	-1.59	Fscn2	fascin homolog 2, actin-bundling protein, retinal (Strongylocentrotus purpuratus) [Source:MGI Symbol;Acc:MGI:2443337]
ENSMUSG00000067081	0.00154	0.185	-2.66	0.052	0.722	-1.65	8.45e-07	7.83e-05	-4.61	0.0253	0.263	-1.75	0.0612	0.917	-1.78	Asb18	ankyrin repeat and SOCS box-containing 18 [Source:MGI Symbol;Acc:MGI:2655109]
ENSMUSG00000098093	0.0051	0.244	-4.17	0.0111	0.467	-3.21	0.000996	0.0097	-4.58	0.0759	0.41	-1.9	0.388	0.943	-1.55	Gm8707	predicted gene 8707 [Source:MGI Symbol;Acc:MGI:3643201]
ENSMUSG00000031137	0.000295	0.0988	-2.4	0.00029	0.107	-2.15	4.64e-09	2.85e-06	-4.55	0.198	0.599	-1.27	0.0644	0.917	-1.55	Fgf13	fibroblast growth factor 13 [Source:MGI Symbol;Acc:MGI:109178]
ENSMUSG00000041460	0.0575	0.465	-1.73	0.794	0.998	-1.06	5.95e-07	6.25e-05	-4.51	0.278	0.678	1.28	0.045	0.91	2.04	Cacna2d4	calcium channel, voltage-dependent, alpha 2/delta subunit 4 [Source:MGI Symbol;Acc:MGI:2442632]
ENSMUSG00000035984	0.316	0.722	-1.72	0.877	0.998	-1.08	0.00447	0.0261	-4.49	0.382	0.76	-1.48	0.709	0.971	1.28	Nme5	NME/NM23 family member 5 [Source:MGI Symbol;Acc:MGI:1922783]
ENSMUSG00000103367	0.429	0.789	-1.58	0.000272	0.107	-6.83	2.63e-05	0.000849	-7.79	2.25e-07	0.000171	-6.27	0.000722	0.202	-3.71	Gm38158	predicted gene, 38158 [Source:MGI Symbol;Acc:MGI:5611386]
ENSMUSG00000035513	0.00187	0.193	-1.64	0.201	0.935	1.2	0.268	0.439	-1.16	0.000878	0.0541	1.57	0.224	0.918	1.23	Ntng2	netrin G2 [Source:MGI Symbol;Acc:MGI:2159341]
ENSMUSG00000031109	0.0112	0.314	-2.01	0.00183	0.226	-2.09	8.26e-08	1.49e-05	-4.42	0.00327	0.102	-1.91	0.059	0.917	-1.65	Enox2	ecto-NOX disulfide-thiol exchanger 2 [Source:MGI Symbol;Acc:MGI:2384799]
ENSMUSG00000050556	4.25e-05	0.0323	-2.35	0.191	0.929	-1.25	1.08e-10	2.88e-07	-4.41	0.00349	0.105	-1.62	0.653	0.962	-1.09	Kcnb1	potassium voltage gated channel, Shab-related subfamily, member 1 [Source:MGI Symbol;Acc:MGI:96666]
ENSMUSG00000103220	0.452	0.801	-1.59	0.41	0.992	1.52	0.00357	0.0223	-4.41	0.0402	0.317	-2.91	0.565	0.955	-1.43	Gm37728	predicted gene, 37728 [Source:MGI Symbol;Acc:MGI:5610956]
ENSMUSG00000050122	0.0237	0.37	-2.71	0.727	0.998	-1.12	0.00042	0.00544	-4.4	0.012	0.189	2.07	0.856	0.989	-1.07	Vwa3b	von Willebrand factor A domain containing 3B [Source:MGI Symbol;Acc:MGI:1918103]
ENSMUSG00000085022	0.0188	0.343	-2.27	0.0132	0.497	-2.36	2.97e-05	0.000929	-4.39	0.246	0.652	-1.4	0.853	0.988	1.07	Gm5860	predicted gene 5860 [Source:MGI Symbol;Acc:MGI:3646172]
ENSMUSG00000068079	0.002	0.194	-3.49	0.353	0.991	1.35	0.108	0.236	-1.71	0.118	0.49	-1.63	0.904	0.994	1.05	Tcf15	transcription factor 15 [Source:MGI Symbol;Acc:MGI:104664]
ENSMUSG00000027313	0.00474	0.238	-2.82	0.0663	0.76	1.78	0.0323	0.103	-2.07	8.85e-06	0.00307	-6.15	0.00157	0.286	-3.96	Chac1	ChaC, cation transport regulator 1 [Source:MGI Symbol;Acc:MGI:1916315]
ENSMUSG00000040732	0.002	0.194	-1.69	0.431	0.992	-1.15	0.434	0.605	-1.13	0.33	0.718	-1.16	0.653	0.962	-1.1	Erg	avian erythroblastosis virus E-26 (v-ets) oncogene related [Source:MGI Symbol;Acc:MGI:95415]
ENSMUSG00000006587	0.002	0.194	-3.07	0.661	0.998	1.15	9.14e-05	0.00187	-4.37	0.894	0.97	-1.04	0.498	0.952	1.34	Snai3	snail family zinc finger 3 [Source:MGI Symbol;Acc:MGI:1353563]
ENSMUSG00000064280	0.00231	0.199	-4.53	0.149	0.897	-1.86	0.00103	0.00994	-4.35	0.431	0.789	-1.34	0.5	0.952	1.41	Ccdc146	coiled-coil domain containing 146 [Source:MGI Symbol;Acc:MGI:1922422]
ENSMUSG00000073375	0.274	0.697	-1.31	0.0825	0.802	-1.47	4.43e-08	1.05e-05	-4.35	0.555	0.855	-1.13	0.955	0.997	-1.01	Lrrc30	leucine rich repeat containing 30 [Source:MGI Symbol;Acc:MGI:2685172]
ENSMUSG00000049551	0.000885	0.164	-2.65	0.981	0.999	-1.01	5.72e-07	6.13e-05	-4.33	0.0489	0.342	-1.53	0.386	0.942	1.29	Fzd9	frizzled homolog 9 (Drosophila) [Source:MGI Symbol;Acc:MGI:1313278]
ENSMUSG00000038453	0.000688	0.141	-3.36	0.0318	0.642	-1.92	5.71e-06	0.000277	-4.32	0.41	0.777	-1.2	0.721	0.972	-1.11	Srcin1	SRC kinase signaling inhibitor 1 [Source:MGI Symbol;Acc:MGI:1933179]
ENSMUSG00000021556	0.0753	0.497	-1.49	0.0149	0.523	-1.61	2.11e-09	1.6e-06	-4.32	0.712	0.911	1.07	0.505	0.952	1.16	Golm1	golgi membrane protein 1 [Source:MGI Symbol;Acc:MGI:1917329]
ENSMUSG00000097214	0.763	0.933	-1.29	0.425	0.992	1.78	0.783	0.875	-1.24	0.00017	0.0208	-5.64	0.261	0.924	-2.03	Gm19791	predicted gene, 19791 [Source:MGI Symbol;Acc:MGI:5011976]
ENSMUSG00000037010	0.00217	0.198	-3.7	0.732	0.998	-1.13	0.0473	0.135	-2.14	0.668	0.896	1.19	0.421	0.946	1.49	Apln	apelin [Source:MGI Symbol;Acc:MGI:1353624]
ENSMUSG00000097739	0.622	0.879	1.34	0.8	0.998	1.15	0.711	0.825	-1.24	9.57e-09	1.41e-05	-5.25	0.02	0.782	-2.36	Gm2539	predicted gene, 2539 [Source:MGI Symbol;Acc:MGI:3780707]
ENSMUSG00000060044	0.00217	0.198	3.61	0.551	0.994	1.21	0.0261	0.0895	2.17	0.622	0.881	-1.17	0.44	0.946	1.36	Tmem26	transmembrane protein 26 [Source:MGI Symbol;Acc:MGI:2143537]
ENSMUSG00000097586	0.314	0.722	-1.68	0.0423	0.692	2.63	0.286	0.458	-1.7	0.000435	0.0358	-5.24	0.261	0.924	-2.05	Gm26528	predicted gene, 26528 [Source:MGI Symbol;Acc:MGI:5477022]
ENSMUSG00000079434	0.00222	0.199	-4.32	0.362	0.991	-1.37	0.0466	0.133	-2.13	0.314	0.706	-1.37	0.908	0.994	1.05	Neu2	neuraminidase 2 [Source:MGI Symbol;Acc:MGI:1344417]
ENSMUSG00000042359	0.0308	0.395	-2	0.108	0.841	-1.56	7.14e-06	0.000326	-4.27	0.0222	0.251	-1.87	0.18	0.918	-1.57	Osbpl6	oxysterol binding protein-like 6 [Source:MGI Symbol;Acc:MGI:2139014]
ENSMUSG00000100110	0.108	0.538	-2.32	0.000922	0.177	-4.79	0.00397	0.024	-4.2	0.145	0.535	-1.93	0.0744	0.917	3.3	Gm28783	predicted gene 28783 [Source:MGI Symbol;Acc:MGI:5579489]
ENSMUSG00000031871	0.00226	0.199	-1.39	0.382	0.991	-1.08	0.0366	0.113	-1.23	0.199	0.6	-1.12	0.924	0.995	-1.01	Cdh5	cadherin 5 [Source:MGI Symbol;Acc:MGI:105057]
ENSMUSG00000030336	0.75	0.931	-1.12	0.776	0.998	-1.08	2.48e-06	0.000156	-4.2	0.403	0.773	-1.33	0.0711	0.917	-1.88	Cd27	CD27 antigen [Source:MGI Symbol;Acc:MGI:88326]
ENSMUSG00000026469	0.00165	0.188	-2.12	0.014	0.51	-1.66	1.33e-08	5.01e-06	-4.17	0.00163	0.0728	-1.89	0.0209	0.782	-1.76	Xpr1	xenotropic and polytropic retrovirus receptor 1 [Source:MGI Symbol;Acc:MGI:97932]
ENSMUSG00000027824	0.0814	0.504	-2.58	0.855	0.998	1.08	0.00638	0.0336	-4.14	0.342	0.73	-1.56	0.396	0.944	1.68	Vmn2r1	vomeronasal 2, receptor 1 [Source:MGI Symbol;Acc:MGI:3645892]
ENSMUSG00000030402	0.00236	0.199	-6.9	0.77	0.998	1.16	0.0237	0.0838	-3.72	0.468	0.81	-1.31	0.231	0.918	-1.96	Ppm1n	protein phosphatase, Mg2+/Mn2+ dependent, 1N (putative) [Source:MGI Symbol;Acc:MGI:2142330]
ENSMUSG00000042834	0.0157	0.337	-2.7	0.959	0.998	-1.02	0.000348	0.0048	-4.13	0.663	0.895	1.16	0.675	0.965	1.19	Nrep	neuronal regeneration related protein [Source:MGI Symbol;Acc:MGI:99444]
ENSMUSG00000084215	0.786	0.942	1.39	0.606	0.995	1.26	0.00318	0.0206	-4.11	0.00233	0.0884	10	0.856	0.989	1.1	Gm11814	predicted gene 11814 [Source:MGI Symbol;Acc:MGI:3650512]
ENSMUSG00000029055	0.789	0.943	-1.15	0.838	0.998	-1.1	0.000796	0.00832	-4.11	0.395	0.77	1.52	0.23	0.918	2.07	Plch2	phospholipase C, eta 2 [Source:MGI Symbol;Acc:MGI:2443078]
ENSMUSG00000084821	0.851	0.961	-1.09	0.881	0.998	-1.07	0.000722	0.00778	-4.11	0.951	0.988	-1.02	0.817	0.987	1.13	Gm15880	predicted gene 15880 [Source:MGI Symbol;Acc:MGI:3802014]
ENSMUSG00000022629	0.00163	0.188	-2.01	0.0608	0.743	-1.42	2.03e-09	1.6e-06	-4.1	0.138	0.524	-1.3	0.811	0.987	1.05	Kif21a	kinesin family member 21A [Source:MGI Symbol;Acc:MGI:109188]
ENSMUSG00000005716	0.0385	0.419	-2.68	0.725	0.998	-1.15	0.00186	0.0146	-4.1	0.718	0.913	-1.16	0.827	0.987	1.11	Pvalb	parvalbumin [Source:MGI Symbol;Acc:MGI:97821]
ENSMUSG00000015879	0.0197	0.35	-4.89	0.808	0.998	-1.11	0.00804	0.0394	-4.09	0.351	0.738	-1.37	0.14	0.917	-2.2	Fam184b	family with sequence similarity 184, member B [Source:MGI Symbol;Acc:MGI:2442958]
ENSMUSG00000105445	0.304	0.716	-1.64	0.042	0.692	2.2	0.00104	0.00994	-4.08	0.622	0.881	1.21	0.49	0.95	1.49	Gm42972	predicted gene 42972 [Source:MGI Symbol;Acc:MGI:5663109]
ENSMUSG00000062561	0.664	0.896	-1.18	0.0298	0.634	-2.19	0.000398	0.00525	-4.08	0.342	0.73	-1.43	0.203	0.918	-1.73	Gm10118	predicted gene 10118 [Source:MGI Symbol;Acc:MGI:3642340]
ENSMUSG00000040485	0.00596	0.258	-3.84	0.766	0.998	1.11	0.000457	0.00574	-4.06	0.217	0.622	1.46	0.967	0.998	1.02	Lrrc52	leucine rich repeat containing 52 [Source:MGI Symbol;Acc:MGI:1924118]
ENSMUSG00000020834	0.00249	0.199	2.84	0.676	0.998	-1.13	0.716	0.828	1.09	0.253	0.658	1.35	0.601	0.956	1.22	Dhrs13	dehydrogenase/reductase (SDR family) member 13 [Source:MGI Symbol;Acc:MGI:1917701]
ENSMUSG00000045103	0.000217	0.0844	-2.94	0.00102	0.179	-2.29	1.14e-06	9.45e-05	-4.02	0.00107	0.0601	-2.22	0.596	0.955	-1.16	Dmd	dystrophin, muscular dystrophy [Source:MGI Symbol;Acc:MGI:94909]
ENSMUSG00000029174	0.19	0.625	-1.47	0.862	0.998	-1.04	2.96e-06	0.000178	-4.01	0.324	0.715	1.26	0.407	0.945	1.28	Tbc1d1	TBC1 domain family, member 1 [Source:MGI Symbol;Acc:MGI:1889508]
ENSMUSG00000064342	0.333	0.732	-1.78	0.896	0.998	-1.06	0.00343	0.0217	-4.01	0.356	0.742	-1.47	0.704	0.97	1.25	mt-Ti	mitochondrially encoded tRNA isoleucine [Source:MGI Symbol;Acc:MGI:102484]
ENSMUSG00000036902	0.244	0.674	-1.55	0.202	0.936	-1.39	8.87e-05	0.00184	-4	0.0304	0.284	2.06	0.068	0.917	2	Neto2	neuropilin (NRP) and tolloid (TLL)-like 2 [Source:MGI Symbol;Acc:MGI:1921763]
ENSMUSG00000086801	0.59	0.866	-1.27	0.673	0.998	-1.19	0.000767	0.0081	-3.75	0.000104	0.0159	-5.19	0.00224	0.35	-4.4	Gm15943	predicted gene 15943 [Source:MGI Symbol;Acc:MGI:3802102]
ENSMUSG00000022235	0.00169	0.188	-3.01	0.212	0.942	1.43	0.000113	0.00219	-3.97	0.839	0.956	1.06	0.157	0.918	-1.62	Cmbl	carboxymethylenebutenolidase-like (Pseudomonas) [Source:MGI Symbol;Acc:MGI:1916824]
ENSMUSG00000034164	0.00836	0.285	-2.72	0.949	0.998	-1.02	5.45e-05	0.00133	-3.95	0.29	0.689	-1.34	0.533	0.955	1.3	Emid1	EMI domain containing 1 [Source:MGI Symbol;Acc:MGI:2155091]
ENSMUSG00000049092	0.00258	0.199	-4.83	0.481	0.993	-1.32	0.00371	0.0229	-3.34	0.000243	0.0258	-5.18	0.0141	0.697	-3.36	Gpr137c	G protein-coupled receptor 137C [Source:MGI Symbol;Acc:MGI:1917963]
ENSMUSG00000102252	0.0106	0.304	-2.33	0.882	0.998	-1.04	1.95e-05	0.000686	-3.93	0.809	0.949	-1.06	0.268	0.925	-1.44	Snrpn	small nuclear ribonucleoprotein N [Source:MGI Symbol;Acc:MGI:98347]
ENSMUSG00000028979	0.157	0.593	2.24	0.363	0.991	1.6	0.00225	0.0163	-3.91	0.232	0.639	-1.65	0.606	0.956	-1.33	Masp2	mannan-binding lectin serine peptidase 2 [Source:MGI Symbol;Acc:MGI:1330832]
ENSMUSG00000059408	0.0129	0.328	-1.93	0.0768	0.782	-1.5	6.96e-07	6.86e-05	-3.85	0.939	0.984	-1.02	0.744	0.977	-1.09	Mrgprh	MAS-related GPR, member H [Source:MGI Symbol;Acc:MGI:1934134]
ENSMUSG00000074764	0.566	0.856	-1.4	0.096	0.816	-2.44	0.0127	0.0545	-4.01	0.000551	0.0407	-5.08	0.0244	0.813	-3.49	Sel1l2	sel-1 suppressor of lin-12-like 2 (C. elegans) [Source:MGI Symbol;Acc:MGI:2684964]
ENSMUSG00000038195	0.00262	0.199	-1.86	0.663	0.998	1.08	0.0113	0.0502	-1.59	0.253	0.658	-1.21	0.735	0.977	-1.07	Rilp	Rab interacting lysosomal protein [Source:MGI Symbol;Acc:MGI:2144271]
ENSMUSG00000020546	0.00886	0.288	-1.8	0.0396	0.679	-1.48	1.63e-08	5.66e-06	-3.82	0.0943	0.45	-1.36	0.225	0.918	-1.32	Stxbp4	syntaxin binding protein 4 [Source:MGI Symbol;Acc:MGI:1342296]
ENSMUSG00000038028	0.000921	0.164	-2.16	0.02	0.575	-1.59	2.87e-08	8.31e-06	-3.8	0.00446	0.118	-1.74	0.117	0.917	-1.44	Tigar	Trp53 induced glycolysis repulatory phosphatase [Source:MGI Symbol;Acc:MGI:2442752]
ENSMUSG00000037904	0.111	0.541	-1.54	0.0847	0.807	-1.51	2.02e-06	0.00014	-3.79	0.307	0.702	-1.26	0.206	0.918	-1.43	Ankrd9	ankyrin repeat domain 9 [Source:MGI Symbol;Acc:MGI:1921501]
ENSMUSG00000025038	0.00517	0.244	-4.49	0.516	0.994	-1.34	0.00461	0.0266	-3.77	0.00363	0.107	3.74	0.974	0.999	1.02	Efhc2	EF-hand domain (C-terminal) containing 2 [Source:MGI Symbol;Acc:MGI:1921655]
ENSMUSG00000031734	0.0175	0.339	-2.31	0.11	0.845	-1.76	0.000219	0.00352	-3.77	0.0186	0.233	1.97	0.3	0.934	1.56	Irx3	Iroquois related homeobox 3 [Source:MGI Symbol;Acc:MGI:1197522]
ENSMUSG00000026077	0.0028	0.204	4.52	0.0874	0.809	2.07	0.507	0.668	1.21	0.95	0.988	1.02	0.781	0.981	1.14	Npas2	neuronal PAS domain protein 2 [Source:MGI Symbol;Acc:MGI:109232]
ENSMUSG00000055523	0.00216	0.198	-5.29	0.652	0.998	-1.23	0.791	0.88	1.15	0.000381	0.0333	-4.95	0.202	0.918	2.6	Gucy2g	guanylate cyclase 2g [Source:MGI Symbol;Acc:MGI:106025]
ENSMUSG00000025453	0.00286	0.204	-2.77	0.672	0.998	-1.13	0.68	0.802	-1.13	0.588	0.869	1.17	0.849	0.988	-1.07	Nnt	nicotinamide nucleotide transhydrogenase [Source:MGI Symbol;Acc:MGI:109279]
ENSMUSG00000028470	0.00287	0.204	-2.34	0.445	0.992	1.23	0.514	0.674	-1.17	0.527	0.841	-1.16	0.582	0.955	1.2	Hint2	histidine triad nucleotide binding protein 2 [Source:MGI Symbol;Acc:MGI:1916167]
ENSMUSG00000022111	0.00287	0.204	-2.2	0.791	0.998	-1.06	0.168	0.32	-1.37	0.495	0.827	-1.16	0.404	0.945	1.27	Uchl3	ubiquitin carboxyl-terminal esterase L3 (ubiquitin thiolesterase) [Source:MGI Symbol;Acc:MGI:1355274]
ENSMUSG00000034614	0.366	0.756	-1.17	0.949	0.998	1.01	0.00531	0.0294	-1.56	1.36e-13	1.09e-09	-4.9	4.8e-10	1.92e-06	-4.65	Pik3ip1	phosphoinositide-3-kinase interacting protein 1 [Source:MGI Symbol;Acc:MGI:1917016]
ENSMUSG00000028251	0.00288	0.204	-2.04	0.435	0.992	-1.18	0.0155	0.0626	-1.73	0.502	0.83	1.15	0.823	0.987	-1.06	Tstd3	thiosulfate sulfurtransferase (rhodanese)-like domain containing 3 [Source:MGI Symbol;Acc:MGI:1924282]
ENSMUSG00000047819	0.00831	0.285	-2.15	0.453	0.992	-1.19	5.61e-06	0.000275	-3.73	0.319	0.709	-1.24	0.989	0.999	-1	Tigd4	tigger transposable element derived 4 [Source:MGI Symbol;Acc:MGI:2685264]
ENSMUSG00000034780	0.00196	0.194	-2.19	0.095	0.814	-1.44	3.14e-07	4.11e-05	-3.72	0.129	0.51	-1.41	0.234	0.919	-1.4	B3galt1	UDP-Gal:betaGlcNAc beta 1,3-galactosyltransferase, polypeptide 1 [Source:MGI Symbol;Acc:MGI:1349403]
ENSMUSG00000022748	0.00822	0.285	-2.26	0.948	0.998	-1.02	8.37e-06	0.000366	-3.72	0.048	0.339	-1.63	0.404	0.945	-1.29	Cmss1	cms small ribosomal subunit 1 [Source:MGI Symbol;Acc:MGI:1913747]
ENSMUSG00000038347	0.028	0.389	-3.08	0.315	0.986	-1.6	0.00453	0.0264	-3.72	0.225	0.631	1.54	0.316	0.936	-1.54	Tcte2	t-complex-associated testis expressed 2 [Source:MGI Symbol;Acc:MGI:98641]
ENSMUSG00000062785	0.0331	0.406	-1.76	0.565	0.994	-1.16	2.62e-07	3.64e-05	-3.72	0.833	0.954	1.04	0.282	0.926	1.31	Kcnc3	potassium voltage gated channel, Shaw-related subfamily, member 3 [Source:MGI Symbol;Acc:MGI:96669]
ENSMUSG00000106867	0.677	0.9	-1.21	0.486	0.993	-1.28	0.000519	0.00629	-3.65	0.0228	0.254	-2.3	0.264	0.924	-1.65	Gm43800	predicted gene 43800 [Source:MGI Symbol;Acc:MGI:5663937]
ENSMUSG00000071573	0.00303	0.21	-1.89	0.989	0.999	-1	0.0174	0.0677	-1.58	0.292	0.692	-1.21	0.847	0.988	1.05	Rnls	renalase, FAD-dependent amine oxidase [Source:MGI Symbol;Acc:MGI:1915045]
ENSMUSG00000050052	2.87e-06	0.0114	-3.22	0.000236	0.0991	-2.23	1.07e-07	1.81e-05	-3.64	0.777	0.934	-1.06	0.0193	0.772	-1.75	Tdrp	testis development related protein [Source:MGI Symbol;Acc:MGI:1919398]
ENSMUSG00000005220	0.0139	0.329	-4.12	0.0374	0.668	-2.85	0.00582	0.0314	-3.64	0.251	0.656	-1.66	0.597	0.955	-1.35	Corin	corin [Source:MGI Symbol;Acc:MGI:1349451]
ENSMUSG00000087366	0.0236	0.37	-2.36	0.0314	0.64	-1.94	3.06e-05	0.000937	-3.64	0.361	0.747	1.23	0.911	0.994	1.04	Junos	jun proto-oncogene, opposite strand [Source:MGI Symbol;Acc:MGI:2652837]
ENSMUSG00000089542	0.00322	0.218	5.66	0.29	0.977	1.67	0.0876	0.204	2.32	0.284	0.683	-1.58	0.888	0.992	1.08	Gm25835	predicted gene, 25835 [Source:MGI Symbol;Acc:MGI:5455612]
ENSMUSG00000023047	0.0136	0.329	-2.77	0.184	0.928	-1.46	0.000175	0.00298	-3.62	0.079	0.417	1.55	0.15	0.918	1.78	Amhr2	anti-Mullerian hormone type 2 receptor [Source:MGI Symbol;Acc:MGI:105062]
ENSMUSG00000039419	0.00611	0.262	-3.14	0.00166	0.226	-3.46	1.51e-06	0.000112	-9.86	9.63e-05	0.0151	-4.65	0.00039	0.176	-5.21	Cntnap2	contactin associated protein-like 2 [Source:MGI Symbol;Acc:MGI:1914047]
ENSMUSG00000022602	0.00325	0.218	-3.81	0.82	0.998	1.08	0.205	0.367	-1.66	0.0645	0.384	2.17	0.823	0.987	1.13	Arc	activity regulated cytoskeletal-associated protein [Source:MGI Symbol;Acc:MGI:88067]
ENSMUSG00000008348	0.119	0.547	-1.87	0.747	0.998	-1.17	0.00198	0.0151	-3.62	0.567	0.86	-1.21	0.916	0.994	-1.05	Ubc	ubiquitin C [Source:MGI Symbol;Acc:MGI:98889]
ENSMUSG00000040147	0.00627	0.264	-1.98	0.036	0.666	-1.6	0.00365	0.0227	-1.9	4.08e-08	3.95e-05	-4.57	1.19e-07	0.000309	-5.43	Maob	monoamine oxidase B [Source:MGI Symbol;Acc:MGI:96916]
ENSMUSG00000037991	0.0527	0.454	-2.16	0.113	0.85	-1.62	0.000112	0.00218	-3.6	0.771	0.933	1.09	0.31	0.934	1.48	Rmi2	RMI2, RecQ mediated genome instability 2, homolog (S. cerevisiae) [Source:MGI Symbol;Acc:MGI:2685383]
ENSMUSG00000085249	0.957	0.992	1.03	0.846	0.998	-1.1	0.00122	0.011	-3.6	0.227	0.635	1.51	0.645	0.96	1.22	Gm12847	predicted gene 12847 [Source:MGI Symbol;Acc:MGI:3650822]
ENSMUSG00000099749	0.203	0.638	-1.78	0.51	0.994	-1.32	0.00186	0.0146	-3.59	0.976	0.994	1.01	0.0268	0.836	4.12	Gm29323	predicted gene 29323 [Source:MGI Symbol;Acc:MGI:5580029]
ENSMUSG00000079037	0.00338	0.221	-1.39	0.889	0.998	1.01	0.0291	0.096	-1.25	0.535	0.844	1.06	0.107	0.917	1.2	Prnp	prion protein [Source:MGI Symbol;Acc:MGI:97769]
ENSMUSG00000028280	0.62	0.878	-1.31	0.84	0.998	1.12	0.00525	0.0293	-3.59	0.0145	0.208	3.73	0.941	0.996	1.05	Gabrr1	gamma-aminobutyric acid (GABA) C receptor, subunit rho 1 [Source:MGI Symbol;Acc:MGI:95625]
ENSMUSG00000002274	0.00128	0.178	-3.03	0.469	0.992	-1.22	1.81e-05	0.000649	-3.58	0.483	0.819	1.19	0.193	0.918	1.6	Metrn	meteorin, glial cell differentiation regulator [Source:MGI Symbol;Acc:MGI:1917333]
ENSMUSG00000052920	0.00373	0.222	-2.51	0.574	0.994	-1.16	0.000122	0.00232	-3.58	0.224	0.631	-1.41	0.313	0.935	1.47	Prkg1	protein kinase, cGMP-dependent, type I [Source:MGI Symbol;Acc:MGI:108174]
ENSMUSG00000030155	0.00346	0.221	-5.26	0.395	0.992	-1.63	0.0841	0.199	-2.64	0.76	0.929	-1.16	0.299	0.934	-1.69	Clec2e	C-type lectin domain family 2, member e [Source:MGI Symbol;Acc:MGI:3028921]
ENSMUSG00000102418	0.00346	0.221	5.61	0.344	0.99	1.63	0.054	0.148	2.67	0.0476	0.339	2.64	0.0297	0.857	4.25	Sh2d1b1	SH2 domain containing 1B1 [Source:MGI Symbol;Acc:MGI:1349420]
ENSMUSG00000047822	0.151	0.588	-2.32	0.652	0.998	1.26	0.00637	0.0336	-3.58	0.132	0.514	-2.15	0.93	0.995	-1.06	Gm6484	predicted gene 6484 [Source:MGI Symbol;Acc:MGI:3643534]
ENSMUSG00000030731	0.00163	0.188	-3.15	0.152	0.9	-1.62	6.96e-05	0.00156	-3.57	0.71	0.911	1.09	0.549	0.955	1.25	Syt3	synaptotagmin III [Source:MGI Symbol;Acc:MGI:99665]
ENSMUSG00000104077	0.265	0.69	1.71	0.391	0.991	-1.45	0.00159	0.0131	-3.56	0.306	0.701	-1.5	0.0858	0.917	-2.29	Gm37027	predicted gene, 37027 [Source:MGI Symbol;Acc:MGI:5610255]
ENSMUSG00000026185	0.0129	0.328	-2.15	0.596	0.995	-1.15	3.89e-05	0.00108	-3.54	0.0411	0.319	1.7	0.608	0.956	1.18	Igfbp5	insulin-like growth factor binding protein 5 [Source:MGI Symbol;Acc:MGI:96440]
ENSMUSG00000091562	0.0181	0.339	-2.3	0.662	0.998	-1.13	0.00032	0.00455	-3.54	0.211	0.615	-1.46	0.914	0.994	1.04	Gm9581	predicted gene 9581 [Source:MGI Symbol;Acc:MGI:3779989]
ENSMUSG00000047361	0.235	0.669	-1.69	0.00216	0.241	-3.08	0.000734	0.00788	-3.54	0.202	0.603	-1.6	0.0556	0.917	-2.42	Gm973	predicted gene 973 [Source:MGI Symbol;Acc:MGI:2685819]
ENSMUSG00000055865	0.00651	0.265	-2.25	0.459	0.992	-1.18	3.33e-06	0.000186	-3.53	0.174	0.57	1.33	0.267	0.925	1.38	Fam19a3	family with sequence similarity 19, member A3 [Source:MGI Symbol;Acc:MGI:3046463]
ENSMUSG00000073485	0.00361	0.221	2.5	0.00085	0.172	2.55	0.462	0.629	1.19	0.866	0.962	-1.05	0.686	0.967	1.14	H3f3aos	H3 histone, family 3A, opposite strand [Source:MGI Symbol;Acc:MGI:3802006]
ENSMUSG00000074579	0.00363	0.222	4.9	0.486	0.993	-1.29	0.645	0.777	1.2	0.846	0.957	-1.08	0.872	0.991	1.08	Lekr1	leucine, glutamate and lysine rich 1 [Source:MGI Symbol;Acc:MGI:3645902]
ENSMUSG00000080533	0.00364	0.222	8.4	0.768	0.998	1.17	0.126	0.261	-2.07	0.247	0.653	1.78	0.61	0.956	-1.36	Mir1191	microRNA 1191 [Source:MGI Symbol;Acc:MGI:3783364]
ENSMUSG00000024033	0.00365	0.222	-4.56	0.239	0.954	-1.59	0.103	0.229	-2.12	0.00153	0.0703	4.37	0.0317	0.859	3.97	Rsph1	radial spoke head 1 homolog (Chlamydomonas) [Source:MGI Symbol;Acc:MGI:1194909]
ENSMUSG00000005672	0.0037	0.222	-1.88	0.752	0.998	-1.07	0.195	0.355	1.3	0.667	0.896	-1.09	0.844	0.988	-1.06	Kit	kit oncogene [Source:MGI Symbol;Acc:MGI:96677]
ENSMUSG00000031431	0.00371	0.222	1.66	0.00685	0.398	-1.51	0.585	0.731	1.09	0.112	0.479	-1.26	0.0163	0.723	-1.55	Tsc22d3	TSC22 domain family, member 3 [Source:MGI Symbol;Acc:MGI:1196284]
ENSMUSG00000046480	0.021	0.356	-1.92	0.188	0.928	-1.38	1.06e-05	0.000441	-3.52	0.0766	0.412	-1.53	0.128	0.917	-1.57	Scn4b	sodium channel, type IV, beta [Source:MGI Symbol;Acc:MGI:2687406]
ENSMUSG00000034055	0.0279	0.389	-1.72	0.153	0.9	-1.36	6.78e-07	6.86e-05	-3.52	0.316	0.707	-1.23	0.382	0.942	-1.25	Phka1	phosphorylase kinase alpha 1 [Source:MGI Symbol;Acc:MGI:97576]
ENSMUSG00000034278	0.00375	0.222	-2.75	0.833	0.998	-1.07	0.566	0.716	-1.18	0.669	0.897	1.13	0.362	0.94	-1.41	Dnajc17	DnaJ (Hsp40) homolog, subfamily C, member 17 [Source:MGI Symbol;Acc:MGI:1916658]
ENSMUSG00000055341	0.00377	0.222	-5.13	0.143	0.888	2	0.996	0.998	1	0.168	0.564	-1.85	0.609	0.956	-1.37	Zfp457	zinc finger protein 457 [Source:MGI Symbol;Acc:MGI:2664334]
ENSMUSG00000045404	0.00377	0.222	8.58	0.51	0.994	-1.45	0.0314	0.101	3.32	0.0508	0.346	2.76	0.841	0.988	1.13	Kcnk13	potassium channel, subfamily K, member 13 [Source:MGI Symbol;Acc:MGI:2384976]
ENSMUSG00000051373	0.00186	0.193	-2.16	0.461	0.992	-1.16	4.68e-07	5.33e-05	-3.51	0.869	0.963	-1.03	0.937	0.996	-1.02	Ppapdc3	phosphatidic acid phosphatase type 2 domain containing 3 [Source:MGI Symbol;Acc:MGI:2445183]
ENSMUSG00000044167	0.691	0.905	1.11	0.00408	0.334	-1.93	0.191	0.349	-1.35	4.2e-08	3.95e-05	-4.36	4.3e-10	1.92e-06	-7.99	Foxo1	forkhead box O1 [Source:MGI Symbol;Acc:MGI:1890077]
ENSMUSG00000025656	0.00456	0.235	-1.86	0.0636	0.753	-1.41	5.19e-08	1.18e-05	-3.51	0.0582	0.366	-1.41	0.0812	0.917	-1.47	Arhgef9	CDC42 guanine nucleotide exchange factor (GEF) 9 [Source:MGI Symbol;Acc:MGI:2442233]
ENSMUSG00000085862	0.315	0.722	1.65	0.451	0.992	-1.4	0.00617	0.0328	-3.51	0.839	0.956	-1.08	0.596	0.955	-1.29	Gm13483	predicted gene 13483 [Source:MGI Symbol;Acc:MGI:3651423]
ENSMUSG00000029153	0.177	0.613	-1.69	0.295	0.981	-1.41	0.000791	0.00829	-3.49	0.216	0.62	-1.48	0.481	0.95	-1.32	Ociad2	OCIA domain containing 2 [Source:MGI Symbol;Acc:MGI:1916377]
ENSMUSG00000056880	1.54e-06	0.00821	-3.14	0.000294	0.107	-1.98	5.78e-08	1.23e-05	-3.47	0.374	0.756	-1.17	0.654	0.963	-1.1	Gadl1	glutamate decarboxylase-like 1 [Source:MGI Symbol;Acc:MGI:1920998]
ENSMUSG00000047343	0.00333	0.221	-2.48	0.428	0.992	-1.23	3.09e-05	0.000939	-3.47	0.991	0.998	1	0.219	0.918	1.49	Mettl21c	methyltransferase like 21C [Source:MGI Symbol;Acc:MGI:3611450]
ENSMUSG00000085218	0.546	0.848	-1.24	0.773	0.998	-1.09	0.000259	0.00389	-3.46	0.153	0.545	-1.52	0.435	0.946	-1.33	BB218582	expressed sequence BB218582 [Source:MGI Symbol;Acc:MGI:2139448]
ENSMUSG00000028033	0.00661	0.266	-1.98	0.432	0.992	-1.17	4.15e-07	5.02e-05	-3.45	0.651	0.891	-1.09	0.85	0.988	-1.04	Kcnq5	potassium voltage-gated channel, subfamily Q, member 5 [Source:MGI Symbol;Acc:MGI:1924937]
ENSMUSG00000057329	0.00399	0.226	-1.85	0.0122	0.486	-1.7	0.714	0.827	-1.07	0.00121	0.0633	-2.05	0.0261	0.831	-1.66	Bcl2	B cell leukemia/lymphoma 2 [Source:MGI Symbol;Acc:MGI:88138]
ENSMUSG00000045751	0.00407	0.229	5.82	0.749	0.998	1.18	0.0236	0.0836	3.22	0.131	0.514	2.28	0.649	0.962	1.34	Mms22l	MMS22-like, DNA repair protein [Source:MGI Symbol;Acc:MGI:2684980]
ENSMUSG00000038194	0.00411	0.229	-3.7	0.0711	0.768	-1.92	0.0192	0.0726	-2.3	0.104	0.466	1.66	0.73	0.975	-1.15	NA	NA
ENSMUSG00000071035	0.00411	0.229	-2.57	0.82	0.998	-1.07	0.182	0.338	-1.48	0.553	0.854	-1.19	0.0647	0.917	-1.95	Gm5499	predicted pseudogene 5499 [Source:MGI Symbol;Acc:MGI:3643804]
ENSMUSG00000079278	0.228	0.662	-1.84	0.532	0.994	-1.32	0.0104	0.0475	-3.45	0.58	0.865	-1.27	0.505	0.952	-1.42	Tmem233	transmembrane protein 233 [Source:MGI Symbol;Acc:MGI:3651514]
ENSMUSG00000004031	0.214	0.647	-1.72	0.193	0.931	-1.66	0.0017	0.0137	-3.43	0.245	0.651	-1.48	0.00577	0.512	-3.43	Brinp2	bone morphogenic protein/retinoic acid inducible neural-specific 2 [Source:MGI Symbol;Acc:MGI:2443333]
ENSMUSG00000089781	0.362	0.754	-1.62	0.532	0.994	-1.28	0.00428	0.0253	-3.41	0.791	0.94	1.1	0.305	0.934	1.74	Gm15756	predicted gene 15756 [Source:MGI Symbol;Acc:MGI:3783199]
ENSMUSG00000025161	0.0288	0.39	-1.94	0.133	0.875	-1.48	4.9e-05	0.00124	-3.4	0.692	0.905	-1.1	0.718	0.971	-1.12	Slc16a3	solute carrier family 16 (monocarboxylic acid transporters), member 3 [Source:MGI Symbol;Acc:MGI:1933438]
ENSMUSG00000025790	0.00203	0.195	-1.74	0.0679	0.764	-1.31	1.65e-10	2.96e-07	-3.38	0.0045	0.118	-1.52	0.495	0.952	-1.13	Slco3a1	solute carrier organic anion transporter family, member 3a1 [Source:MGI Symbol;Acc:MGI:1351867]
ENSMUSG00000040113	0.0024	0.199	-2.12	0.0202	0.577	-1.68	3.03e-07	4e-05	-3.38	0.217	0.622	-1.26	0.591	0.955	-1.14	Mettl11b	methyltransferase like 11B [Source:MGI Symbol;Acc:MGI:2685053]
ENSMUSG00000038205	0.0144	0.331	-1.81	0.351	0.99	-1.22	1.04e-06	9.12e-05	-3.38	0.00472	0.121	-1.81	0.0227	0.802	-1.79	Prkab2	protein kinase, AMP-activated, beta 2 non-catalytic subunit [Source:MGI Symbol;Acc:MGI:1336185]
ENSMUSG00000021361	0.00423	0.23	-2.4	0.55	0.994	1.18	0.0792	0.191	-1.55	0.527	0.841	-1.16	0.209	0.918	1.57	Tmem14c	transmembrane protein 14C [Source:MGI Symbol;Acc:MGI:1913404]
ENSMUSG00000026504	0.00425	0.23	-1.71	0.678	0.998	1.07	0.0472	0.134	-1.38	0.97	0.992	-1.01	0.753	0.979	-1.06	Sdccag8	serologically defined colon cancer antigen 8 [Source:MGI Symbol;Acc:MGI:1924066]
ENSMUSG00000033590	0.0519	0.453	-1.49	0.835	0.998	-1.04	1.84e-08	6.01e-06	-3.38	0.272	0.673	-1.2	0.329	0.938	-1.22	Myo5c	myosin VC [Source:MGI Symbol;Acc:MGI:2442485]
ENSMUSG00000004567	0.0043	0.23	-1.53	0.49	0.993	1.09	0.0807	0.193	-1.25	0.412	0.778	1.1	0.892	0.992	1.02	Mcoln1	mucolipin 1 [Source:MGI Symbol;Acc:MGI:1890498]
ENSMUSG00000044471	0.824	0.954	-1.11	0.881	0.998	-1.06	0.334	0.51	-1.47	0.000363	0.0326	-4.35	0.07	0.917	-2.42	Lincpint	long intergenic non-protein coding RNA, Trp53 induced transcript [Source:MGI Symbol;Acc:MGI:2673128]
ENSMUSG00000085201	0.11	0.539	-1.87	0.0836	0.802	-1.72	0.00113	0.0105	-3.38	0.00209	0.084	-2.83	0.264	0.924	1.73	Nr6a1os	nuclear receptor subfamily 6, group A, member 1, opposite strand [Source:MGI Symbol;Acc:MGI:3649430]
ENSMUSG00000038227	0.00434	0.23	-1.63	0.837	0.998	-1.03	0.113	0.245	-1.26	0.986	0.997	-1	0.672	0.965	1.08	Hoxa9	homeobox A9 [Source:MGI Symbol;Acc:MGI:96180]
ENSMUSG00000004394	0.00434	0.23	-1.59	0.877	0.998	-1.02	0.0816	0.195	-1.28	0.138	0.524	-1.22	0.467	0.948	1.13	Tmed4	transmembrane emp24 protein transport domain containing 4 [Source:MGI Symbol;Acc:MGI:1915070]
ENSMUSG00000037852	0.00709	0.269	-1.99	0.33	0.987	-1.24	2.28e-06	0.00015	-3.37	0.144	0.533	-1.36	0.201	0.918	-1.39	Cpe	carboxypeptidase E [Source:MGI Symbol;Acc:MGI:101932]
ENSMUSG00000023345	0.00436	0.23	-3.1	0.0925	0.813	-1.89	0.0735	0.182	-1.8	0.922	0.979	1.03	0.802	0.985	-1.1	Poc1a	POC1 centriolar protein homolog A (Chlamydomonas) [Source:MGI Symbol;Acc:MGI:1917485]
ENSMUSG00000083823	0.104	0.53	-2.2	0.092	0.813	-1.88	0.0025	0.0175	-4.38	0.00054	0.0403	-4.26	0.368	0.94	-1.62	Amd-ps1	S-adenosylmethionine decarboxylase, pseudogene 1 [Source:MGI Symbol;Acc:MGI:1310005]
ENSMUSG00000027075	0.121	0.551	1.35	0.355	0.991	1.16	0.455	0.623	1.13	7.45e-11	2.38e-07	-4.19	2.32e-06	0.004	-3.06	Slc43a1	solute carrier family 43, member 1 [Source:MGI Symbol;Acc:MGI:1931352]
ENSMUSG00000063953	3.49e-05	0.0291	-4.82	0.00589	0.383	-2.11	3.25e-09	2.32e-06	-12.8	1.85e-05	0.00469	-4.05	0.00306	0.404	-2.73	Amd2	S-adenosylmethionine decarboxylase 2 [Source:MGI Symbol;Acc:MGI:1333111]
ENSMUSG00000097390	0.00448	0.233	4.4	0.89	0.998	-1.05	0.558	0.71	1.22	0.989	0.998	-1	0.774	0.98	1.16	Gm26785	predicted gene, 26785 [Source:MGI Symbol;Acc:MGI:5477279]
ENSMUSG00000107182	0.017	0.339	-2.04	0.487	0.993	-1.21	4.81e-05	0.00123	-3.33	0.0574	0.365	-1.71	0.395	0.944	-1.3	Gm43268	predicted gene 43268 [Source:MGI Symbol;Acc:MGI:5663405]
ENSMUSG00000027784	0.0217	0.361	-1.64	0.0941	0.814	-1.37	1.22e-07	1.96e-05	-3.33	0.00182	0.0769	-1.8	0.042	0.91	-1.58	Ppm1l	protein phosphatase 1 (formerly 2C)-like [Source:MGI Symbol;Acc:MGI:2139740]
ENSMUSG00000038141	0.00461	0.237	-1.52	0.0787	0.791	1.27	0.131	0.269	1.22	0.117	0.487	1.22	0.751	0.978	1.05	Tmem181a	transmembrane protein 181A [Source:MGI Symbol;Acc:MGI:1924356]
ENSMUSG00000103703	0.618	0.877	1.24	0.408	0.992	1.39	0.0025	0.0175	-3.33	0.822	0.951	-1.08	0.812	0.987	1.12	Gm37453	predicted gene, 37453 [Source:MGI Symbol;Acc:MGI:5610681]
ENSMUSG00000022102	0.00466	0.238	3.97	0.462	0.992	-1.36	0.0207	0.0765	2.55	0.0248	0.262	2.62	0.589	0.955	1.33	Dok2	docking protein 2 [Source:MGI Symbol;Acc:MGI:1332623]
ENSMUSG00000095298	0.0614	0.472	-2.11	0.793	0.998	1.15	0.000471	0.00586	-3.3	0.888	0.969	-1.07	0.996	1	-1	Gm12407	predicted gene 12407 [Source:MGI Symbol;Acc:MGI:3693096]
ENSMUSG00000085363	0.0204	0.356	-2.95	0.00795	0.415	-3.23	0.00452	0.0264	-3.29	0.51	0.834	-1.33	0.225	0.918	-1.9	Gm15478	predicted gene 15478 [Source:MGI Symbol;Acc:MGI:3705145]
ENSMUSG00000040430	0.0016	0.188	-1.97	0.577	0.994	-1.1	7.33e-08	1.43e-05	-3.28	0.543	0.847	-1.11	0.418	0.946	-1.19	Pitpnc1	phosphatidylinositol transfer protein, cytoplasmic 1 [Source:MGI Symbol;Acc:MGI:1919045]
ENSMUSG00000006542	0.0477	0.445	-1.81	0.432	0.992	-1.23	6.7e-05	0.00152	-3.28	0.865	0.962	-1.04	0.686	0.967	-1.13	Prkag3	protein kinase, AMP-activated, gamma 3 non-catatlytic subunit [Source:MGI Symbol;Acc:MGI:1891343]
ENSMUSG00000058013	0.00473	0.238	1.47	0.0201	0.577	1.32	0.0892	0.207	1.23	0.576	0.863	1.06	0.0452	0.91	-1.33	2021-09-11	septin 11 [Source:MGI Symbol;Acc:MGI:1277214]
ENSMUSG00000085440	0.232	0.665	-1.62	0.0004	0.123	-3.87	7.68e-06	0.000346	-5.62	0.000129	0.0173	-3.89	0.00249	0.366	-3.44	Sorbs2os	sorbin and SH3 domain containing 2, opposite strand [Source:MGI Symbol;Acc:MGI:2443013]
ENSMUSG00000097324	0.642	0.885	-1.28	0.329	0.987	-1.62	0.00739	0.0374	-3.28	0.893	0.97	-1.07	0.428	0.946	-1.58	Mir143hg	Mir143 and Mir145 host gene (non-protein coding) [Source:MGI Symbol;Acc:MGI:4439832]
ENSMUSG00000005534	1.75e-08	0.000279	-3.58	0.526	0.994	-1.11	1.41e-08	5.01e-06	-3.27	0.00407	0.112	-1.62	1.03e-08	3.29e-05	-4	Insr	insulin receptor [Source:MGI Symbol;Acc:MGI:96575]
ENSMUSG00000005580	0.0403	0.421	-1.6	0.0875	0.809	-1.4	4.21e-07	5.02e-05	-3.27	0.00805	0.159	-1.68	0.0268	0.836	-1.7	Adcy9	adenylate cyclase 9 [Source:MGI Symbol;Acc:MGI:108450]
ENSMUSG00000081221	0.00489	0.242	-4.4	0.258	0.963	1.83	0.947	0.971	1.04	0.181	0.58	2.17	0.965	0.998	-1.03	Gm14760	predicted gene 14760 [Source:MGI Symbol;Acc:MGI:3709612]
ENSMUSG00000029337	0.00489	0.242	3.76	0.095	0.814	1.91	0.308	0.483	-1.49	0.864	0.962	-1.07	0.0174	0.741	4.13	Fgf5	fibroblast growth factor 5 [Source:MGI Symbol;Acc:MGI:95519]
ENSMUSG00000023153	0.0566	0.463	-1.68	0.638	0.997	-1.12	1.64e-05	0.000613	-3.27	0.688	0.903	1.09	0.66	0.963	1.13	Tmem52	transmembrane protein 52 [Source:MGI Symbol;Acc:MGI:1916921]
ENSMUSG00000020493	0.00493	0.242	7.04	0.293	0.978	1.86	0.0295	0.0972	4.02	0.0553	0.358	3.17	0.0849	0.917	4.43	Prr11	proline rich 11 [Source:MGI Symbol;Acc:MGI:2444496]
ENSMUSG00000106831	0.649	0.889	-1.23	0.055	0.73	2.31	0.00442	0.0259	-3.27	0.486	0.821	1.3	0.294	0.932	-1.62	Ube2n-ps1	ubiquitin-conjugating enzyme E2N, pseudogene 1 [Source:MGI Symbol;Acc:MGI:894296]
ENSMUSG00000087080	0.95	0.99	-1.03	0.00303	0.29	2.67	0.00435	0.0256	-3.27	0.00614	0.14	-3.32	0.4	0.944	-1.59	Gm12199	predicted gene 12199 [Source:MGI Symbol;Acc:MGI:3650414]
ENSMUSG00000033917	0.00499	0.243	-1.63	0.578	0.994	-1.09	0.0186	0.071	-1.45	0.58	0.865	-1.08	0.842	0.988	-1.04	Gde1	glycerophosphodiester phosphodiesterase 1 [Source:MGI Symbol;Acc:MGI:1891827]
ENSMUSG00000040653	0.0121	0.319	-1.92	0.0164	0.523	-1.73	6.3e-06	0.000297	-3.26	0.614	0.878	1.11	0.892	0.992	1.04	Ppp1r14c	protein phosphatase 1, regulatory (inhibitor) subunit 14c [Source:MGI Symbol;Acc:MGI:1923392]
ENSMUSG00000097749	0.00507	0.244	5.36	0.0289	0.627	3.28	0.209	0.37	1.94	0.947	0.987	-1.03	0.84	0.988	-1.13	Gm16938	predicted gene, 16938 [Source:MGI Symbol;Acc:MGI:4439862]
ENSMUSG00000022747	0.0147	0.331	-1.7	0.819	0.998	-1.04	1.9e-07	2.78e-05	-3.26	0.93	0.982	1.02	0.945	0.996	1.02	St3gal6	ST3 beta-galactoside alpha-2,3-sialyltransferase 6 [Source:MGI Symbol;Acc:MGI:1888707]
ENSMUSG00000074623	0.318	0.723	-1.41	0.66	0.998	-1.16	0.000248	0.00378	-3.26	0.0391	0.314	-2.07	0.591	0.955	-1.21	Gm826	predicted gene 826 [Source:MGI Symbol;Acc:MGI:2685672]
ENSMUSG00000026942	0.0051	0.244	1.49	0.0546	0.73	1.27	0.149	0.294	1.19	0.991	0.998	1	0.364	0.94	1.16	Traf2	TNF receptor-associated factor 2 [Source:MGI Symbol;Acc:MGI:101835]
ENSMUSG00000021275	0.403	0.775	-1.2	0.114	0.854	-1.36	3.35e-07	4.26e-05	-3.25	0.00321	0.102	-1.76	0.0752	0.917	-1.51	Tecpr2	tectonin beta-propeller repeat containing 2 [Source:MGI Symbol;Acc:MGI:2144865]
ENSMUSG00000051236	0.00416	0.229	-1.84	0.00844	0.428	-1.63	1.19e-07	1.96e-05	-3.24	0.0111	0.184	-1.58	0.0852	0.917	-1.46	Msrb3	methionine sulfoxide reductase B3 [Source:MGI Symbol;Acc:MGI:2443538]
ENSMUSG00000063388	0.0854	0.509	-2.29	0.907	0.998	-1.05	0.0102	0.0468	-3.23	0.799	0.945	1.11	0.844	0.988	1.1	BC023105	cDNA sequence BC023105 [Source:MGI Symbol;Acc:MGI:2384767]
ENSMUSG00000027457	0.00115	0.173	-3.07	0.000219	0.0947	-3.65	1.72e-08	5.72e-06	-7.01	8.83e-06	0.00307	-3.81	0.00337	0.407	-2.57	Snph	syntaphilin [Source:MGI Symbol;Acc:MGI:2139270]
ENSMUSG00000030772	0.586	0.864	-1.24	0.015	0.523	-2.34	0.000447	0.00565	-3.21	0.0574	0.365	-1.81	0.000397	0.176	-4.3	Dkk3	dickkopf homolog 3 (Xenopus laevis) [Source:MGI Symbol;Acc:MGI:1354952]
ENSMUSG00000020668	0.0025	0.199	-1.65	2.24e-06	0.00714	-2.08	1.07e-10	2.88e-07	-3.2	0.0219	0.251	-1.37	0.0068	0.538	-1.59	Kif3c	kinesin family member 3C [Source:MGI Symbol;Acc:MGI:107979]
ENSMUSG00000022889	0.00522	0.245	-1.71	0.785	0.998	1.05	0.129	0.266	-1.29	0.827	0.953	1.03	0.637	0.96	1.11	Mrpl39	mitochondrial ribosomal protein L39 [Source:MGI Symbol;Acc:MGI:1351620]
ENSMUSG00000074121	0.0654	0.483	-1.78	0.536	0.994	1.2	0.000188	0.00314	-3.2	0.297	0.695	1.28	0.838	0.987	1.07	Ntf5	neurotrophin 5 [Source:MGI Symbol;Acc:MGI:97381]
ENSMUSG00000019370	0.0923	0.52	-1.76	0.42	0.992	-1.27	0.000441	0.0056	-3.2	0.335	0.724	-1.32	0.575	0.955	-1.22	Calm3	calmodulin 3 [Source:MGI Symbol;Acc:MGI:103249]
ENSMUSG00000029759	0.00212	0.198	-2.17	0.115	0.855	-1.4	3.35e-06	0.000187	-3.19	0.00348	0.105	-1.89	0.355	0.94	-1.27	Pon3	paraoxonase 3 [Source:MGI Symbol;Acc:MGI:106686]
ENSMUSG00000039242	0.00626	0.264	-1.86	0.0285	0.626	-1.54	5.61e-07	6.09e-05	-3.19	0.1	0.461	-1.36	0.431	0.946	-1.2	B3galnt2	UDP-GalNAc:betaGlcNAc beta 1,3-galactosaminyltransferase, polypeptide 2 [Source:MGI Symbol;Acc:MGI:2145517]
ENSMUSG00000024298	0.236	0.669	-1.49	0.92	0.998	1.03	0.00169	0.0136	-3.19	0.152	0.544	-1.75	0.0259	0.831	3.68	Zfp871	zinc finger protein 871 [Source:MGI Symbol;Acc:MGI:1921793]
ENSMUSG00000098973	0.907	0.979	1.07	0.422	0.992	1.48	0.0111	0.0497	-3.18	0.00619	0.141	-3.5	0.327	0.938	1.89	Mir6236	microRNA 6236 [Source:MGI Symbol;Acc:MGI:5530929]
ENSMUSG00000038764	7.75e-07	0.00619	-2.16	0.192	0.931	-1.17	3.58e-12	3.74e-08	-3.17	0.629	0.883	1.06	0.57	0.955	1.09	Ptpn3	protein tyrosine phosphatase, non-receptor type 3 [Source:MGI Symbol;Acc:MGI:105307]
ENSMUSG00000105100	0.00542	0.247	4.86	0.897	0.998	-1.06	0.0809	0.194	-2.03	0.561	0.856	1.26	0.972	0.998	1.02
ENSMUSG00000006705	0.00545	0.247	1.69	0.762	0.998	-1.05	0.392	0.567	1.14	0.418	0.781	1.13	0.831	0.987	1.04	Pknox1	Pbx/knotted 1 homeobox [Source:MGI Symbol;Acc:MGI:1201409]
ENSMUSG00000079481	0.00545	0.247	1.74	0.195	0.934	-1.24	0.085	0.2	1.34	0.91	0.975	-1.02	0.0215	0.791	-1.59	Nhsl2	NHS-like 2 [Source:MGI Symbol;Acc:MGI:3645090]
ENSMUSG00000096393	0.00546	0.247	-4.32	0.96	0.998	-1.03	0.777	0.87	-1.15	0.547	0.849	-1.35	0.0919	0.917	3.42	Gm590	predicted gene 590 [Source:MGI Symbol;Acc:MGI:2685436]
ENSMUSG00000046532	0.0126	0.326	-1.84	0.0816	0.801	-1.44	2.77e-06	0.00017	-3.17	0.0293	0.278	-1.58	0.204	0.918	-1.38	Ar	androgen receptor [Source:MGI Symbol;Acc:MGI:88064]
ENSMUSG00000084241	0.939	0.988	-1.04	0.319	0.986	-1.45	0.0111	0.0498	-3.17	0.125	0.502	-1.86	0.0784	0.917	-2.45	Gm13416	predicted gene 13416 [Source:MGI Symbol;Acc:MGI:3652158]
ENSMUSG00000072919	0.711	0.913	1.24	0.286	0.974	-1.59	0.0101	0.0465	-3.16	0.931	0.982	-1.03	0.26	0.924	-1.86	Noxred1	NADP+ dependent oxidoreductase domain containing 1 [Source:MGI Symbol;Acc:MGI:1918525]
ENSMUSG00000042942	0.00563	0.252	3.45	0.362	0.991	1.39	0.119	0.252	1.73	0.657	0.893	-1.17	0.214	0.918	-1.75	Greb1l	growth regulation by estrogen in breast cancer-like [Source:MGI Symbol;Acc:MGI:3576497]
ENSMUSG00000085583	0.364	0.755	-1.34	0.729	0.998	-1.1	0.000159	0.0028	-3.15	0.609	0.877	1.14	0.743	0.977	-1.11	Gm15676	predicted gene 15676 [Source:MGI Symbol;Acc:MGI:3783118]
ENSMUSG00000104720	0.716	0.915	1.18	0.601	0.995	1.24	0.00609	0.0325	-3.15	0.14	0.527	1.98	0.846	0.988	1.1	Gm43138	predicted gene 43138 [Source:MGI Symbol;Acc:MGI:5663275]
ENSMUSG00000031438	0.0104	0.302	-1.83	0.0733	0.772	-1.46	3.82e-06	0.000205	-3.14	0.247	0.654	-1.24	0.825	0.987	1.06	Rnf128	ring finger protein 128 [Source:MGI Symbol;Acc:MGI:1914139]
ENSMUSG00000046818	0.131	0.565	-1.64	0.465	0.992	1.23	0.000408	0.00534	-3.14	0.424	0.785	-1.25	0.693	0.968	-1.14	Ddit4l	DNA-damage-inducible transcript 4-like [Source:MGI Symbol;Acc:MGI:1920534]
ENSMUSG00000049173	0.26	0.686	-1.59	0.741	0.998	-1.13	0.00419	0.0249	-3.13	0.587	0.868	1.21	0.715	0.971	-1.17	Myoz3	myozenin 3 [Source:MGI Symbol;Acc:MGI:2179296]
ENSMUSG00000071042	0.0197	0.35	-2.03	0.0974	0.819	-1.55	0.00013	0.00241	-3.11	0.166	0.562	-1.42	0.28	0.926	-1.4	Rasgrp3	RAS, guanyl releasing protein 3 [Source:MGI Symbol;Acc:MGI:3028579]
ENSMUSG00000086605	2.8e-05	0.0265	-2.57	0.00693	0.398	-1.67	4.42e-07	5.18e-05	-3.1	0.147	0.537	-1.28	0.918	0.995	-1.02	Gm14290	predicted gene 14290 [Source:MGI Symbol;Acc:MGI:3649702]
ENSMUSG00000075232	0.00259	0.199	-3.51	0.0108	0.467	-2.55	1.83e-09	1.6e-06	-15.9	0.000247	0.0258	-3.8	0.0132	0.674	-2.97	Amd1	S-adenosylmethionine decarboxylase 1 [Source:MGI Symbol;Acc:MGI:88004]
ENSMUSG00000001988	0.00595	0.258	4.84	0.899	0.998	-1.06	0.138	0.278	2.15	0.0476	0.339	2.6	0.411	0.945	1.64	Npas1	neuronal PAS domain protein 1 [Source:MGI Symbol;Acc:MGI:109205]
ENSMUSG00000025197	0.959	0.993	1.02	0.0677	0.764	-1.94	0.0611	0.161	-1.86	0.000443	0.036	-3.69	0.404	0.945	-1.56	Cyp2c44	cytochrome P450, family 2, subfamily c, polypeptide 44 [Source:MGI Symbol;Acc:MGI:1888897]
ENSMUSG00000082884	0.00597	0.258	-4.7	0.352	0.99	1.58	0.206	0.368	-1.89	0.885	0.969	1.08	0.204	0.918	2.48	Gm13339	predicted gene 13339 [Source:MGI Symbol;Acc:MGI:3650221]
ENSMUSG00000044986	0.00598	0.258	-1.98	0.987	0.999	-1	0.099	0.223	-1.44	0.039	0.313	-1.57	0.871	0.99	1.05	Tst	thiosulfate sulfurtransferase, mitochondrial [Source:MGI Symbol;Acc:MGI:98852]
ENSMUSG00000027499	0.0224	0.363	-1.7	0.196	0.934	-1.3	2.24e-06	0.000149	-3.08	0.0263	0.268	-1.55	0.612	0.956	-1.13	Pkia	protein kinase inhibitor, alpha [Source:MGI Symbol;Acc:MGI:104747]
ENSMUSG00000050965	0.0334	0.406	-1.6	0.0311	0.64	-1.52	8.5e-07	7.83e-05	-3.08	0.0215	0.247	-1.54	0.0737	0.917	-1.51	Prkca	protein kinase C, alpha [Source:MGI Symbol;Acc:MGI:97595]
ENSMUSG00000053205	0.644	0.887	-1.18	0.231	0.951	-1.45	0.000621	0.00712	-3.08	0.000894	0.0545	-2.97	0.774	0.98	-1.11	Styx	serine/threonine/tyrosine interaction protein [Source:MGI Symbol;Acc:MGI:1891150]
ENSMUSG00000001334	0.00258	0.199	-1.86	0.883	0.998	-1.03	1.22e-07	1.96e-05	-3.07	0.798	0.944	1.04	0.23	0.918	1.28	Fndc5	fibronectin type III domain containing 5 [Source:MGI Symbol;Acc:MGI:1917614]
ENSMUSG00000039372	0.0944	0.521	-2	0.376	0.991	1.48	0.00164	0.0134	-3.07	0.021	0.244	-2.25	0.565	0.955	1.38	2021-03-04	membrane-associated ring finger (C3HC4) 4 [Source:MGI Symbol;Acc:MGI:2683550]
ENSMUSG00000085348	0.152	0.589	-1.64	0.856	0.998	1.05	0.000732	0.00787	-3.05	0.744	0.924	-1.1	0.874	0.991	-1.06	Gm12300	predicted gene 12300 [Source:MGI Symbol;Acc:MGI:3650429]
ENSMUSG00000030465	0.0995	0.526	-1.54	0.078	0.788	-1.5	2.51e-05	0.000821	-3.04	0.0345	0.297	-1.62	0.992	0.999	1	Psd3	pleckstrin and Sec7 domain containing 3 [Source:MGI Symbol;Acc:MGI:1918215]
ENSMUSG00000039304	0.00625	0.264	-1.92	0.242	0.955	-1.3	0.62	0.758	1.11	0.202	0.604	-1.43	0.93	0.995	-1.03	Tnfsf10	tumor necrosis factor (ligand) superfamily, member 10 [Source:MGI Symbol;Acc:MGI:107414]
ENSMUSG00000025352	0.0145	0.331	-2.36	0.0185	0.552	-2.14	0.000473	0.00588	-3.03	0.582	0.866	-1.15	0.706	0.97	1.14	Gdf11	growth differentiation factor 11 [Source:MGI Symbol;Acc:MGI:1338027]
ENSMUSG00000044556	0.326	0.726	-1.47	0.847	0.998	-1.07	0.00196	0.015	-3.03	0.87	0.963	-1.05	0.638	0.96	-1.22	Tex38	testis expressed 38 [Source:MGI Symbol;Acc:MGI:1922423]
ENSMUSG00000040118	0.0182	0.34	-1.89	0.232	0.951	-1.32	3.33e-05	0.00099	-3.02	0.0434	0.327	-1.58	0.704	0.97	1.11	Cacna2d1	calcium channel, voltage-dependent, alpha2/delta subunit 1 [Source:MGI Symbol;Acc:MGI:88295]
ENSMUSG00000026971	0.00647	0.265	-1.89	0.66	0.998	-1.09	2.34e-06	0.000152	-3.01	0.329	0.717	-1.2	0.788	0.982	1.07	Itgb6	integrin beta 6 [Source:MGI Symbol;Acc:MGI:96615]
ENSMUSG00000036764	0.0063	0.264	-1.65	0.0338	0.652	-1.43	0.027	0.0914	-1.42	0.00785	0.157	-1.5	0.859	0.99	-1.04	Dnajc12	DnaJ (Hsp40) homolog, subfamily C, member 12 [Source:MGI Symbol;Acc:MGI:1353428]
ENSMUSG00000040287	0.00908	0.292	-2.01	0.369	0.991	-1.23	2.94e-05	0.000924	-3.01	0.834	0.954	-1.05	0.921	0.995	-1.03	Stac3	SH3 and cysteine rich domain 3 [Source:MGI Symbol;Acc:MGI:3606571]
ENSMUSG00000032313	0.0105	0.303	-3.08	0.277	0.968	-1.55	0.0109	0.0492	-3	0.413	0.778	-1.34	0.618	0.957	1.3	AI118078	expressed sequence AI118078 [Source:MGI Symbol;Acc:MGI:2142980]
ENSMUSG00000045257	0.00641	0.265	-2.94	0.232	0.951	-1.65	0.0257	0.0887	-2.26	0.644	0.889	-1.16	0.402	0.945	1.57	Morn2	MORN repeat containing 2 [Source:MGI Symbol;Acc:MGI:2674071]
ENSMUSG00000038880	0.00641	0.265	-1.98	0.188	0.928	-1.35	0.0138	0.0578	-1.69	0.866	0.962	-1.03	0.459	0.948	1.25	Mrps34	mitochondrial ribosomal protein S34 [Source:MGI Symbol;Acc:MGI:1930188]
ENSMUSG00000020526	0.00643	0.265	-1.81	0.166	0.916	-1.29	0.018	0.0694	-1.56	0.279	0.678	-1.21	0.826	0.987	1.05	Znhit3	zinc finger, HIT type 3 [Source:MGI Symbol;Acc:MGI:3051596]
ENSMUSG00000092569	0.0732	0.494	-1.87	0.862	0.998	-1.05	0.000516	0.00626	-2.99	0.0419	0.322	-1.66	0.0911	0.917	-1.76	Gm20544	predicted gene 20544 [Source:MGI Symbol;Acc:MGI:5142009]
ENSMUSG00000037989	0.149	0.587	-1.42	0.0342	0.655	-1.58	7.86e-06	0.000351	-2.99	0.006	0.139	-1.79	0.0292	0.855	-1.75	Wnk2	WNK lysine deficient protein kinase 2 [Source:MGI Symbol;Acc:MGI:1922857]
ENSMUSG00000047746	0.0109	0.309	-1.59	0.635	0.997	-1.08	1.72e-08	5.72e-06	-2.98	0.0412	0.319	-1.37	0.215	0.918	-1.26	Fbxo40	F-box protein 40 [Source:MGI Symbol;Acc:MGI:2443753]
ENSMUSG00000100826	0.0248	0.374	-2	0.769	0.998	-1.07	0.000145	0.00262	-2.98	0.894	0.97	1.03	0.367	0.94	-1.32	Snhg14	small nucleolar RNA host gene 14 [Source:MGI Symbol;Acc:MGI:1289201]
ENSMUSG00000042363	0.039	0.419	-1.75	0.0624	0.75	-1.55	4.63e-05	0.00121	-2.97	0.00269	0.0946	-2.03	0.0754	0.917	-1.65	Lgalsl	lectin, galactoside binding-like [Source:MGI Symbol;Acc:MGI:1916114]
ENSMUSG00000015217	0.00654	0.266	-1.83	0.626	0.997	1.09	0.224	0.389	-1.27	0.482	0.819	1.13	0.372	0.94	-1.24	Hmgb3	high mobility group box 3 [Source:MGI Symbol;Acc:MGI:1098219]
ENSMUSG00000048602	0.109	0.539	2.26	0.544	0.994	1.26	0.00984	0.0455	-2.96	0.165	0.561	-1.67	0.628	0.959	-1.28	Morc2b	microrchidia 2B [Source:MGI Symbol;Acc:MGI:3045293]
ENSMUSG00000030584	0.435	0.793	-1.34	0.391	0.991	-1.28	0.000225	0.00359	-2.96	0.767	0.931	1.08	0.464	0.948	1.32	Dpf1	D4, zinc and double PHD fingers family 1 [Source:MGI Symbol;Acc:MGI:1352748]
ENSMUSG00000007617	0.0221	0.362	-1.49	0.888	0.998	-1.02	7.2e-09	3.59e-06	-2.95	0.00494	0.125	-1.52	0.818	0.987	-1.04	Homer1	homer homolog 1 (Drosophila) [Source:MGI Symbol;Acc:MGI:1347345]
ENSMUSG00000015709	0.00665	0.266	-2.08	0.304	0.984	-1.47	0.324	0.5	1.38	0.0433	0.326	-1.61	0.0837	0.917	-1.9	Arnt2	aryl hydrocarbon receptor nuclear translocator 2 [Source:MGI Symbol;Acc:MGI:107188]
ENSMUSG00000021203	0.575	0.86	-1.16	0.198	0.934	1.32	1.06e-05	0.000443	-2.95	0.11	0.476	1.38	0.442	0.948	1.23	Otub2	OTU domain, ubiquitin aldehyde binding 2 [Source:MGI Symbol;Acc:MGI:1915399]
ENSMUSG00000030399	0.0215	0.36	-1.79	0.427	0.992	-1.19	2.18e-05	0.000738	-2.94	0.294	0.692	-1.25	0.775	0.98	1.08	Ckm	creatine kinase, muscle [Source:MGI Symbol;Acc:MGI:88413]
ENSMUSG00000020014	0.0702	0.493	-1.66	0.487	0.993	-1.2	5.84e-05	0.0014	-2.91	0.423	0.784	-1.21	0.106	0.917	1.73	Cfap54	cilia and flagella associated protein 54 [Source:MGI Symbol;Acc:MGI:1922208]
ENSMUSG00000064349	0.532	0.842	-1.35	0.834	0.998	1.08	0.00454	0.0264	-2.91	0.0384	0.312	-2.12	0.296	0.933	1.76	mt-Tc	mitochondrially encoded tRNA cysteine [Source:MGI Symbol;Acc:MGI:102490]
ENSMUSG00000026915	0.0172	0.339	-1.64	0.496	0.993	-1.13	5.8e-07	6.17e-05	-2.9	0.0984	0.457	-1.33	0.209	0.918	-1.31	Strbp	spermatid perinuclear RNA binding protein [Source:MGI Symbol;Acc:MGI:104626]
ENSMUSG00000030946	0.0217	0.361	-1.87	5.39e-05	0.0615	-2.69	5.21e-05	0.00128	-2.89	0.335	0.724	-1.22	0.318	0.936	-1.32	Lhpp	phospholysine phosphohistidine inorganic pyrophosphate phosphatase [Source:MGI Symbol;Acc:MGI:1923679]
ENSMUSG00000105245	0.146	0.585	-1.42	0.811	0.998	-1.05	4.61e-06	0.00024	-2.89	0.0393	0.314	-1.49	0.151	0.918	-1.42	Gm43076	predicted gene 43076 [Source:MGI Symbol;Acc:MGI:5663213]
ENSMUSG00000035529	0.00679	0.267	-1.51	0.209	0.94	-1.18	0.259	0.43	-1.16	0.66	0.893	-1.06	0.0722	0.917	-1.33	Prdm4	PR domain containing 4 [Source:MGI Symbol;Acc:MGI:1920093]
ENSMUSG00000029361	0.17	0.608	-1.52	0.0837	0.802	-1.59	0.000369	0.00499	-2.88	0.276	0.677	1.32	0.59	0.955	1.19	Nos1	nitric oxide synthase 1, neuronal [Source:MGI Symbol;Acc:MGI:97360]
ENSMUSG00000038203	0.376	0.76	-1.42	0.488	0.993	1.29	0.00558	0.0305	-2.87	0.436	0.794	-1.32	0.957	0.997	-1.02	Hoxa13	homeobox A13 [Source:MGI Symbol;Acc:MGI:96173]
ENSMUSG00000025732	0.0164	0.338	-2.19	0.429	0.992	-1.24	0.000153	0.00272	-2.85	0.0703	0.398	-1.57	0.163	0.918	1.71	Fam195a	family with sequence similarity 195, member A [Source:MGI Symbol;Acc:MGI:1915491]
ENSMUSG00000002228	0.0232	0.368	-1.84	0.837	0.998	-1.05	4.48e-05	0.00119	-2.85	0.593	0.871	1.12	0.845	0.988	1.05	Ppm1j	protein phosphatase 1J [Source:MGI Symbol;Acc:MGI:1919137]
ENSMUSG00000057003	0.0345	0.409	-1.62	0.41	0.992	-1.18	4.88e-06	0.000248	-2.85	0.102	0.464	-1.37	0.597	0.955	-1.13	Myh4	myosin, heavy polypeptide 4, skeletal muscle [Source:MGI Symbol;Acc:MGI:1339713]
ENSMUSG00000037151	0.00414	0.229	-1.7	0.0393	0.678	-1.39	6.91e-08	1.4e-05	-2.84	0.0109	0.182	-1.49	0.07	0.917	-1.41	Lrrc20	leucine rich repeat containing 20 [Source:MGI Symbol;Acc:MGI:2387182]
ENSMUSG00000029513	0.0069	0.267	1.66	0.112	0.85	1.3	0.045	0.13	1.36	0.567	0.86	1.09	0.0582	0.917	1.53	Prkab1	protein kinase, AMP-activated, beta 1 non-catalytic subunit [Source:MGI Symbol;Acc:MGI:1336167]
ENSMUSG00000062006	0.00692	0.267	2.83	0.711	0.998	1.18	0.131	0.268	-1.64	0.703	0.909	1.11	0.592	0.955	1.21	Rpl34	ribosomal protein L34 [Source:MGI Symbol;Acc:MGI:1915686]
ENSMUSG00000036879	0.0504	0.451	-1.56	0.541	0.994	-1.13	6.23e-06	0.000294	-2.84	0.0975	0.455	-1.37	0.247	0.923	-1.31	Phkb	phosphorylase kinase beta [Source:MGI Symbol;Acc:MGI:97578]
ENSMUSG00000008658	0.0722	0.494	-1.49	0.0825	0.802	-1.41	4.9e-06	0.000248	-2.84	0.015	0.212	-1.6	0.0779	0.917	-1.51	Rbfox1	RNA binding protein, fox-1 homolog (C. elegans) 1 [Source:MGI Symbol;Acc:MGI:1926224]
ENSMUSG00000043953	0.804	0.946	-1.06	0.0367	0.666	1.55	0.00109	0.0103	-1.82	4.2e-08	3.95e-05	-3.61	0.0166	0.723	-2	Ccrl2	chemokine (C-C motif) receptor-like 2 [Source:MGI Symbol;Acc:MGI:1920904]
ENSMUSG00000039704	0.429	0.789	-1.3	0.784	0.998	1.08	0.00344	0.0218	-2.84	0.444	0.799	-1.28	0.0647	0.917	2.51	Lmbrd2	LMBR1 domain containing 2 [Source:MGI Symbol;Acc:MGI:2444173]
ENSMUSG00000081485	0.00702	0.268	-5.21	0.856	0.998	1.11	0.89	0.94	-1.08	0.487	0.822	1.47	0.948	0.996	1.04	Gm12338	predicted gene 12338 [Source:MGI Symbol;Acc:MGI:3650622]
ENSMUSG00000052135	0.0144	0.331	-2.07	0.514	0.994	1.16	0.000194	0.00322	-2.83	0.0354	0.301	1.62	0.0928	0.917	1.76	Foxo6	forkhead box O6 [Source:MGI Symbol;Acc:MGI:2676586]
ENSMUSG00000035172	0.0984	0.525	-1.49	0.229	0.951	-1.29	1.47e-05	0.000564	-2.83	0.023	0.254	1.58	0.373	0.94	1.26	Plekhh3	pleckstrin homology domain containing, family H (with MyTH4 domain) member 3 [Source:MGI Symbol;Acc:MGI:2384950]
ENSMUSG00000020169	0.116	0.545	-1.56	0.67	0.998	1.11	0.00014	0.00255	-2.83	0.0352	0.3	-1.64	0.0464	0.91	-1.78	Best3	bestrophin 3 [Source:MGI Symbol;Acc:MGI:3580298]
ENSMUSG00000025586	0.024	0.371	-1.49	0.777	0.998	-1.04	2.97e-08	8.31e-06	-2.82	0.000819	0.0515	-1.68	0.027	0.84	-1.52	Cpeb1	cytoplasmic polyadenylation element binding protein 1 [Source:MGI Symbol;Acc:MGI:108442]
ENSMUSG00000100801	0.00715	0.27	5.03	0.456	0.992	-1.35	0.0974	0.22	-2.02	0.808	0.949	1.11	0.291	0.93	-1.73	Gm15459	predicted gene 15459 [Source:MGI Symbol;Acc:MGI:3705702]
ENSMUSG00000062077	0.0421	0.427	-1.76	0.428	0.992	-1.21	0.000152	0.00271	-2.82	0.459	0.806	-1.19	0.883	0.992	-1.04	Trim54	tripartite motif-containing 54 [Source:MGI Symbol;Acc:MGI:1889623]
ENSMUSG00000056121	0.000748	0.147	-1.95	0.0332	0.648	-1.43	2.04e-07	2.93e-05	-2.81	0.017	0.224	-1.47	0.14	0.917	-1.34	Fez2	fasciculation and elongation protein zeta 2 (zygin II) [Source:MGI Symbol;Acc:MGI:2675856]
ENSMUSG00000035314	0.152	0.589	-1.37	0.875	0.998	1.03	1.26e-06	9.83e-05	-2.81	0.0525	0.351	-1.43	0.758	0.979	1.08	Gdpd5	glycerophosphodiester phosphodiesterase domain containing 5 [Source:MGI Symbol;Acc:MGI:2686926]
ENSMUSG00000022594	0.231	0.664	-1.48	0.838	0.998	1.06	0.00116	0.0107	-2.81	0.311	0.703	-1.32	0.851	0.988	-1.07	Lynx1	Ly6/neurotoxin 1 [Source:MGI Symbol;Acc:MGI:1345180]
ENSMUSG00000020475	0.0392	0.419	-2.41	0.559	0.994	-1.24	0.0102	0.0467	-2.8	0.562	0.857	-1.23	0.356	0.94	1.49	Pgam2	phosphoglycerate mutase 2 [Source:MGI Symbol;Acc:MGI:1933118]
ENSMUSG00000027010	0.00174	0.188	-1.7	0.159	0.906	-1.22	1.33e-08	5.01e-06	-2.79	0.0378	0.309	-1.34	0.374	0.94	-1.16	Slc25a12	solute carrier family 25 (mitochondrial carrier, Aralar), member 12 [Source:MGI Symbol;Acc:MGI:1926080]
ENSMUSG00000073403	0.00733	0.272	4.53	0.863	0.998	1.1	0.0752	0.185	2.49	0.723	0.916	1.21	0.888	0.992	1.09	Gm10499	predicted gene 10499 [Source:MGI Symbol;Acc:MGI:3702919]
ENSMUSG00000020672	0.00734	0.272	-3.57	0.789	0.998	1.12	0.304	0.479	-1.59	0.138	0.524	1.83	0.201	0.918	2.17	Sntg2	syntrophin, gamma 2 [Source:MGI Symbol;Acc:MGI:1919541]
ENSMUSG00000050164	0.0349	0.409	-1.9	0.984	0.999	-1.01	0.000326	0.0046	-2.79	0.993	0.999	1	0.229	0.918	-1.51	Mchr1	melanin-concentrating hormone receptor 1 [Source:MGI Symbol;Acc:MGI:2180756]
ENSMUSG00000045757	0.00739	0.272	2.16	0.0982	0.819	1.55	0.412	0.585	1.2	0.301	0.697	1.27	0.894	0.993	1.05	Zfp764	zinc finger protein 764 [Source:MGI Symbol;Acc:MGI:2443580]
ENSMUSG00000026027	0.000251	0.0889	-1.98	0.0704	0.767	-1.32	5.5e-08	1.19e-05	-2.78	0.102	0.463	-1.28	0.772	0.98	-1.05	Stradb	STE20-related kinase adaptor beta [Source:MGI Symbol;Acc:MGI:2144047]
ENSMUSG00000065460	0.895	0.975	-1.05	0.51	0.994	-1.28	0.000848	0.00872	-2.78	0.855	0.959	-1.05	0.937	0.996	1.04	Mir133a-2	microRNA 133a-2 [Source:MGI Symbol;Acc:MGI:3618718]
ENSMUSG00000021668	0.00332	0.221	-2.13	0.00501	0.368	-1.88	3.8e-05	0.00107	-2.77	0.0552	0.358	-1.53	0.701	0.969	1.11	Polk	polymerase (DNA directed), kappa [Source:MGI Symbol;Acc:MGI:1349767]
ENSMUSG00000028393	0.0075	0.273	-1.89	0.74	0.998	1.08	0.027	0.0913	-1.61	0.503	0.83	1.15	0.576	0.955	1.17	Alad	aminolevulinate, delta-, dehydratase [Source:MGI Symbol;Acc:MGI:96853]
ENSMUSG00000097705	0.827	0.955	1.06	0.21	0.941	1.34	0.187	0.344	-1.38	2.95e-06	0.00131	-3.6	0.0218	0.795	-1.98	Gm26740	predicted gene, 26740 [Source:MGI Symbol;Acc:MGI:5477234]
ENSMUSG00000087014	0.157	0.594	-1.73	0.894	0.998	-1.05	0.00324	0.0209	-2.77	0.749	0.925	-1.11	0.818	0.987	-1.1	Gm16364	predicted gene 16364 [Source:MGI Symbol;Acc:MGI:3840142]
ENSMUSG00000020799	0.376	0.76	-1.44	0.495	0.993	1.32	0.00444	0.026	-2.77	0.498	0.828	1.23	0.018	0.752	-2.61	Tekt1	tektin 1 [Source:MGI Symbol;Acc:MGI:1333819]
ENSMUSG00000036825	0.02	0.354	-1.49	0.799	0.998	1.04	2.29e-08	7.32e-06	-2.76	0.762	0.93	-1.04	0.956	0.997	1.01	Ssx2ip	synovial sarcoma, X breakpoint 2 interacting protein [Source:MGI Symbol;Acc:MGI:2139150]
ENSMUSG00000025791	0.0631	0.478	-1.66	0.758	0.998	-1.08	0.000159	0.0028	-2.76	0.911	0.976	-1.03	0.919	0.995	-1.03	Pgm2	phosphoglucomutase 2 [Source:MGI Symbol;Acc:MGI:97565]
ENSMUSG00000079022	0.00762	0.273	-2.03	0.384	0.991	-1.22	0.0515	0.143	-1.59	0.351	0.738	-1.22	0.959	0.997	1.01	Col22a1	collagen, type XXII, alpha 1 [Source:MGI Symbol;Acc:MGI:1916950]
ENSMUSG00000056758	0.00764	0.273	10.8	0.736	0.998	1.33	0.0315	0.102	6.17	0.734	0.919	-1.22	0.502	0.952	1.83	Hmga2	high mobility group AT-hook 2 [Source:MGI Symbol;Acc:MGI:101761]
ENSMUSG00000037738	0.00765	0.273	2.8	0.903	0.998	1.04	0.0114	0.0505	2.31	0.0247	0.261	2.82	0.91	0.994	-1.05	Nek5	NIMA (never in mitosis gene a)-related expressed kinase 5 [Source:MGI Symbol;Acc:MGI:2142824]
ENSMUSG00000057719	0.648	0.889	-1.15	0.0124	0.49	-1.87	0.000294	0.00427	-2.76	0.513	0.834	1.16	0.0149	0.699	-2.06	Sh3rf2	SH3 domain containing ring finger 2 [Source:MGI Symbol;Acc:MGI:2444628]
ENSMUSG00000021748	0.00766	0.273	-1.56	0.698	0.998	-1.06	0.0829	0.197	-1.3	0.653	0.892	-1.06	0.588	0.955	1.1	Pdhb	pyruvate dehydrogenase (lipoamide) beta [Source:MGI Symbol;Acc:MGI:1915513]
ENSMUSG00000089797	0.00496	0.242	-3.61	0.137	0.878	-1.82	0.0051	0.0287	-2.75	0.0549	0.357	-2.07	0.7	0.969	1.24	Gm16118	predicted gene 16118 [Source:MGI Symbol;Acc:MGI:3801926]
ENSMUSG00000048371	0.00773	0.274	-1.7	0.565	0.994	1.12	0.472	0.638	-1.14	0.0329	0.292	-1.56	0.474	0.949	-1.19	Pdp2	pyruvate dehyrogenase phosphatase catalytic subunit 2 [Source:MGI Symbol;Acc:MGI:1918878]
ENSMUSG00000044056	0.659	0.893	-1.19	0.803	0.998	1.08	0.00309	0.0202	-2.75	0.667	0.896	-1.14	0.991	0.999	1	Efcab9	EF-hand calcium binding domain 9 [Source:MGI Symbol;Acc:MGI:1916556]
ENSMUSG00000022528	0.00791	0.279	-1.79	0.198	0.934	1.29	0.438	0.608	-1.16	0.00232	0.0884	1.77	0.755	0.979	1.08	Hes1	hairy and enhancer of split 1 (Drosophila) [Source:MGI Symbol;Acc:MGI:104853]
ENSMUSG00000088378	0.00792	0.279	4.59	0.316	0.986	1.62	0.68	0.802	-1.2	0.987	0.997	1.01	0.0481	0.917	3.56	Gm25184	predicted gene, 25184 [Source:MGI Symbol;Acc:MGI:5454961]
ENSMUSG00000042961	0.0331	0.406	-1.79	0.307	0.984	-1.27	0.000165	0.00287	-2.74	0.0917	0.445	-1.49	0.518	0.952	-1.21	Egflam	EGF-like, fibronectin type III and laminin G domains [Source:MGI Symbol;Acc:MGI:2146149]
ENSMUSG00000079355	0.00814	0.283	-2.87	0.104	0.83	1.84	0.485	0.649	-1.27	0.67	0.897	1.15	0.0364	0.894	3.41	Ackr4	atypical chemokine receptor 4 [Source:MGI Symbol;Acc:MGI:2181676]
ENSMUSG00000059363	0.00815	0.283	-1.83	0.741	0.998	-1.07	0.0211	0.0776	-1.6	0.381	0.76	-1.17	0.818	0.987	1.06	Fxn	frataxin [Source:MGI Symbol;Acc:MGI:1096879]
ENSMUSG00000087480	0.287	0.706	-1.46	0.896	0.998	1.04	0.000719	0.00776	-2.74	0.0138	0.203	-2.06	0.51	0.952	1.29	Gm15910	predicted gene 15910 [Source:MGI Symbol;Acc:MGI:3802158]
ENSMUSG00000031387	0.00826	0.285	3.13	0.915	0.998	1.04	0.0171	0.067	2.47	0.00125	0.0633	3.85	0.743	0.977	1.16	Renbp	renin binding protein [Source:MGI Symbol;Acc:MGI:105940]
ENSMUSG00000024294	0.527	0.84	-1.2	0.925	0.998	-1.02	0.000441	0.0056	-2.73	0.122	0.497	-1.47	0.361	0.94	1.32	Mib1	mindbomb homolog 1 (Drosophila) [Source:MGI Symbol;Acc:MGI:2443157]
ENSMUSG00000034449	0.0083	0.285	-2.05	0.942	0.998	-1.02	0.0225	0.0809	-1.77	0.353	0.74	1.23	0.581	0.955	1.17	Dhrs11	dehydrogenase/reductase (SDR family) member 11 [Source:MGI Symbol;Acc:MGI:2652816]
ENSMUSG00000019852	0.00831	0.285	-3.78	0.558	0.994	-1.3	0.2	0.361	-1.93	0.297	0.695	-1.71	0.853	0.988	-1.12	Arfgef3	ARFGEF family member 3 [Source:MGI Symbol;Acc:MGI:106387]
ENSMUSG00000002910	0.115	0.545	1.94	0.171	0.923	-1.62	0.00883	0.0422	-2.71	0.166	0.562	-1.6	0.0235	0.812	-2.65	Arrdc2	arrestin domain containing 2 [Source:MGI Symbol;Acc:MGI:1918057]
ENSMUSG00000028307	0.00835	0.285	-10.1	0.752	0.998	1.27	0.606	0.747	-1.43	0.419	0.782	1.89	0.541	0.955	1.82	Aldob	aldolase B, fructose-bisphosphate [Source:MGI Symbol;Acc:MGI:87995]
ENSMUSG00000015342	0.0866	0.511	-1.45	0.47	0.992	-1.14	5.96e-06	0.000285	-2.7	0.0716	0.4	-1.41	0.236	0.92	-1.32	Xk	Kell blood group precursor (McLeod phenotype) homolog [Source:MGI Symbol;Acc:MGI:103569]
ENSMUSG00000050147	0.317	0.723	-1.43	0.707	0.998	1.12	0.000652	0.0073	-2.69	0.585	0.868	-1.18	0.537	0.955	1.29	F2rl3	coagulation factor II (thrombin) receptor-like 3 [Source:MGI Symbol;Acc:MGI:1298207]
ENSMUSG00000003949	0.000519	0.122	-2.49	0.222	0.948	-1.3	5.73e-05	0.00138	-2.67	0.00671	0.146	-1.82	0.206	0.918	-1.38	Hlf	hepatic leukemia factor [Source:MGI Symbol;Acc:MGI:96108]
ENSMUSG00000023861	0.0084	0.285	-1.77	0.593	0.995	1.1	0.0354	0.11	-1.5	0.0469	0.337	-1.43	0.793	0.983	-1.06	Mpc1	mitochondrial pyruvate carrier 1 [Source:MGI Symbol;Acc:MGI:1915240]
ENSMUSG00000047798	0.00843	0.286	11.5	0.979	0.999	-1.02	0.047	0.134	4.04	0.0104	0.178	9.13	0.183	0.918	4.53	Cd300lf	CD300 antigen like family member F [Source:MGI Symbol;Acc:MGI:2442359]
ENSMUSG00000022723	0.00693	0.267	-1.9	0.501	0.994	-1.14	2.27e-05	0.000766	-2.67	0.253	0.658	-1.25	0.529	0.955	-1.16	Crybg3	beta-gamma crystallin domain containing 3 [Source:MGI Symbol;Acc:MGI:2676311]
ENSMUSG00000031647	0.013	0.328	-1.67	0.0199	0.575	-1.52	2.36e-06	0.000152	-2.67	0.328	0.717	-1.19	0.0527	0.917	-1.53	Mfap3l	microfibrillar-associated protein 3-like [Source:MGI Symbol;Acc:MGI:1918556]
ENSMUSG00000043531	0.0172	0.339	-1.97	2.91e-06	0.00774	-4.61	7.45e-05	0.00163	-2.67	0.354	0.741	-1.37	0.165	0.918	-1.67	Sorcs1	sortilin-related VPS10 domain containing receptor 1 [Source:MGI Symbol;Acc:MGI:1929666]
ENSMUSG00000000627	0.00853	0.286	2.87	0.00212	0.241	3.68	0.105	0.231	1.76	0.104	0.466	1.91	0.515	0.952	1.41	Sema4f	sema domain, immunoglobulin domain (Ig), TM domain, and short cytoplasmic domain [Source:MGI Symbol;Acc:MGI:1340055]
ENSMUSG00000032366	0.0508	0.452	-1.95	0.556	0.994	-1.19	0.00298	0.0197	-2.65	0.339	0.727	-1.32	0.848	0.988	-1.07	Tpm1	tropomyosin 1, alpha [Source:MGI Symbol;Acc:MGI:98809]
ENSMUSG00000079418	0.000521	0.122	-2.02	0.0703	0.767	-1.37	7.69e-07	7.35e-05	-2.64	0.359	0.745	-1.15	0.237	0.921	-1.26	Atg4a	autophagy related 4A, cysteine peptidase [Source:MGI Symbol;Acc:MGI:2147903]
ENSMUSG00000052026	0.00862	0.287	4.95	0.826	0.998	1.11	0.0439	0.128	2.29	0.0982	0.457	2.13	0.265	0.925	2.14	Slc6a7	solute carrier family 6 (neurotransmitter transporter, L-proline), member 7 [Source:MGI Symbol;Acc:MGI:2147363]
ENSMUSG00000064340	0.0202	0.355	-2.4	0.0989	0.821	1.68	0.00484	0.0277	-2.64	0.0338	0.296	-1.9	0.173	0.918	1.89	mt-Tl1	mitochondrially encoded tRNA leucine 1 [Source:MGI Symbol;Acc:MGI:102482]
ENSMUSG00000038871	0.0623	0.476	-1.78	0.879	0.998	-1.04	0.00105	0.01	-2.64	0.452	0.803	-1.21	0.585	0.955	-1.19	Bpgm	2,3-bisphosphoglycerate mutase [Source:MGI Symbol;Acc:MGI:1098242]
ENSMUSG00000024096	0.00866	0.287	1.3	0.8	0.998	-1.02	0.0436	0.127	1.2	0.0224	0.252	-1.21	0.00665	0.537	-1.34	Ralbp1	ralA binding protein 1 [Source:MGI Symbol;Acc:MGI:108466]
ENSMUSG00000025129	0.141	0.579	-1.65	0.267	0.967	-1.39	0.00319	0.0207	-2.64	0.0109	0.182	-2.13	0.663	0.963	1.17	Ppp1r27	protein phosphatase 1, regulatory subunit 27 [Source:MGI Symbol;Acc:MGI:1915951]
ENSMUSG00000083327	0.462	0.806	-1.27	0.947	0.998	1.04	0.00193	0.0149	-2.64	0.68	0.9	1.24	0.944	0.996	-1.05	Vcp-rs	valosin containing protein, related sequence [Source:MGI Symbol;Acc:MGI:894298]
ENSMUSG00000023094	0.00414	0.229	-1.84	0.406	0.992	1.17	1.78e-06	0.000127	-2.62	0.255	0.66	-1.21	0.748	0.978	-1.07	Msrb2	methionine sulfoxide reductase B2 [Source:MGI Symbol;Acc:MGI:1923717]
ENSMUSG00000028883	0.00877	0.288	-1.97	0.0817	0.801	-1.56	0.662	0.79	-1.11	0.323	0.713	-1.29	0.712	0.971	-1.14	Sema3a	sema domain, immunoglobulin domain (Ig), short basic domain, secreted, (semaphorin) 3A [Source:MGI Symbol;Acc:MGI:107558]
ENSMUSG00000087523	0.0257	0.378	-2	0.417	0.992	-1.24	0.00111	0.0104	-2.62	0.251	0.656	-1.34	0.433	0.946	1.29	Gm12319	predicted gene 12319 [Source:MGI Symbol;Acc:MGI:3649749]
ENSMUSG00000067242	0.0387	0.419	-1.87	0.095	0.814	-1.49	0.000993	0.00969	-2.62	0.619	0.879	1.1	0.355	0.94	1.31	Lgi1	leucine-rich repeat LGI family, member 1 [Source:MGI Symbol;Acc:MGI:1861691]
ENSMUSG00000104453	0.194	0.63	-1.27	0.886	0.998	1.02	4.21e-07	5.02e-05	-2.62	0.161	0.557	-1.24	0.247	0.923	-1.25	Gm37829	predicted gene, 37829 [Source:MGI Symbol;Acc:MGI:5611057]
ENSMUSG00000087408	0.39	0.766	-1.29	0.634	0.997	1.13	0.000458	0.00575	-2.62	0.502	0.83	-1.17	0.995	1	1	Cers1	ceramide synthase 1 [Source:MGI Symbol;Acc:MGI:2136690]
ENSMUSG00000095687	0.535	0.843	-1.34	0.236	0.953	-1.59	0.00663	0.0346	-2.62	0.613	0.878	1.21	0.0822	0.917	-2.51	Rnaset2a	ribonuclease T2A [Source:MGI Symbol;Acc:MGI:1915445]
ENSMUSG00000020354	0.00624	0.264	-1.96	0.34	0.99	1.22	0.000119	0.00228	-2.61	0.949	0.988	1.01	0.0125	0.647	2.25	Sgcd	sarcoglycan, delta (dystrophin-associated glycoprotein) [Source:MGI Symbol;Acc:MGI:1346525]
ENSMUSG00000028197	0.0123	0.32	-2.55	0.9	0.998	-1.04	0.00201	0.0153	-2.61	0.000952	0.0567	2.26	0.149	0.918	1.58	Col24a1	collagen, type XXIV, alpha 1 [Source:MGI Symbol;Acc:MGI:1918605]
ENSMUSG00000044938	0.0528	0.454	-1.54	0.773	0.998	-1.06	1.89e-05	0.000669	-2.61	0.00106	0.0598	-1.9	0.139	0.917	-1.41	Klhl31	kelch-like 31 [Source:MGI Symbol;Acc:MGI:3045305]
ENSMUSG00000022550	0.00906	0.292	1.81	0.000768	0.168	2.09	0.434	0.604	1.15	0.0623	0.378	1.4	0.49	0.95	1.19	Adck5	aarF domain containing kinase 5 [Source:MGI Symbol;Acc:MGI:2679274]
ENSMUSG00000039976	0.106	0.533	-1.37	0.261	0.963	-1.21	1.4e-06	0.000105	-2.61	0.995	0.999	1	0.527	0.955	-1.14	Tbc1d16	TBC1 domain family, member 16 [Source:MGI Symbol;Acc:MGI:2652878]
ENSMUSG00000048337	0.00909	0.292	-3.36	0.416	0.992	-1.36	0.0228	0.0817	-2.45	0.751	0.926	-1.16	0.43	0.946	-1.47	Npy4r	neuropeptide Y receptor Y4 [Source:MGI Symbol;Acc:MGI:105374]
ENSMUSG00000000532	0.116	0.545	-1.37	0.0265	0.623	-1.49	3.07e-06	0.00018	-2.61	0.185	0.585	-1.25	0.0104	0.616	-1.73	Acvr1b	activin A receptor, type 1B [Source:MGI Symbol;Acc:MGI:1338944]
ENSMUSG00000032418	0.00569	0.254	-2.32	0.132	0.872	-1.47	0.000872	0.00886	-2.59	0.0449	0.332	-1.66	0.25	0.923	-1.42	Me1	malic enzyme 1, NADP(+)-dependent, cytosolic [Source:MGI Symbol;Acc:MGI:97043]
ENSMUSG00000023913	0.0461	0.44	-1.62	0.927	0.998	1.02	6.62e-05	0.00151	-2.59	0.631	0.884	-1.1	0.333	0.938	-1.28	Pla2g7	phospholipase A2, group VII (platelet-activating factor acetylhydrolase, plasma) [Source:MGI Symbol;Acc:MGI:1351327]
ENSMUSG00000030089	0.0514	0.453	-1.5	0.286	0.974	-1.21	5.55e-06	0.000273	-2.59	0.106	0.467	-1.32	0.708	0.971	-1.08	Slc41a3	solute carrier family 41, member 3 [Source:MGI Symbol;Acc:MGI:1918949]
ENSMUSG00000037990	0.0092	0.292	-1.88	0.955	0.998	-1.02	0.132	0.27	1.65	0.363	0.748	1.35	0.687	0.967	1.18	Sh3rf3	SH3 domain containing ring finger 3 [Source:MGI Symbol;Acc:MGI:2444637]
ENSMUSG00000027765	0.00922	0.292	-1.67	0.421	0.992	1.14	0.274	0.446	-1.21	0.279	0.678	1.2	0.6	0.956	1.11	P2ry1	purinergic receptor P2Y, G-protein coupled 1 [Source:MGI Symbol;Acc:MGI:105049]
ENSMUSG00000028937	0.00922	0.292	-1.62	0.839	0.998	-1.03	0.0196	0.0735	-1.46	0.0354	0.301	-1.37	0.55	0.955	-1.12	Acot7	acyl-CoA thioesterase 7 [Source:MGI Symbol;Acc:MGI:1917275]
ENSMUSG00000074807	0.0953	0.522	-1.51	0.39	0.991	-1.2	5.89e-05	0.0014	-2.59	0.00663	0.145	-1.76	0.0313	0.857	-1.72	Gm10762	predicted gene 10762 [Source:MGI Symbol;Acc:MGI:3704209]
ENSMUSG00000074264	0.101	0.526	-1.77	6.17e-05	0.0615	-3.79	0.00229	0.0165	-2.59	0.000964	0.0567	-2.83	0.00185	0.312	-3.21	Amy1	amylase 1, salivary [Source:MGI Symbol;Acc:MGI:88019]
ENSMUSG00000022096	0.321	0.725	-1.29	0.104	0.83	-1.44	0.000177	0.00301	-2.58	0.426	0.787	1.19	0.735	0.977	-1.09	Hr	hairless [Source:MGI Symbol;Acc:MGI:96223]
ENSMUSG00000045100	0.00269	0.202	-2.11	0.125	0.866	-1.38	5.18e-05	0.00128	-2.57	0.626	0.882	-1.1	0.98	0.999	-1.01	Slc25a26	solute carrier family 25 (mitochondrial carrier, phosphate carrier), member 26 [Source:MGI Symbol;Acc:MGI:1914832]
ENSMUSG00000020309	0.0498	0.449	-1.64	0.451	0.992	-1.17	4.08e-05	0.00112	-2.57	0.484	0.82	-1.15	0.326	0.938	1.29	Chac2	ChaC, cation transport regulator 2 [Source:MGI Symbol;Acc:MGI:1915294]
ENSMUSG00000086298	0.0328	0.404	-1.85	0.941	0.998	1.02	0.000578	0.00675	-2.56	0.568	0.86	1.14	0.29	0.928	1.38	Gm11716	predicted gene 11716 [Source:MGI Symbol;Acc:MGI:3649215]
ENSMUSG00000032115	0.00936	0.292	1.57	0.216	0.942	-1.2	0.0212	0.0778	1.43	0.15	0.541	1.23	0.303	0.934	1.2	Hyou1	hypoxia up-regulated 1 [Source:MGI Symbol;Acc:MGI:108030]
ENSMUSG00000027022	0.0319	0.402	-1.59	0.892	0.998	1.03	1.4e-05	0.000548	-2.55	0.113	0.481	-1.33	0.347	0.939	1.23	Xirp2	xin actin-binding repeat containing 2 [Source:MGI Symbol;Acc:MGI:2685198]
ENSMUSG00000033624	0.0344	0.409	-1.52	0.544	0.994	-1.11	4.02e-06	0.000212	-2.54	0.0118	0.188	-1.54	0.27	0.925	-1.25	Pdpr	pyruvate dehydrogenase phosphatase regulatory subunit [Source:MGI Symbol;Acc:MGI:2442188]
ENSMUSG00000025887	0.00942	0.292	-1.8	0.224	0.949	-1.27	0.0956	0.217	-1.4	0.0539	0.355	-1.51	0.34	0.938	-1.28	Casp12	caspase 12 [Source:MGI Symbol;Acc:MGI:1312922]
ENSMUSG00000031519	0.0799	0.501	-1.52	0.00141	0.21	-2	8.17e-05	0.00174	-2.54	0.00138	0.0659	-1.96	0.0921	0.917	-1.52	Asb5	ankyrin repeat and SOCs box-containing 5 [Source:MGI Symbol;Acc:MGI:1923544]
ENSMUSG00000016349	0.016	0.338	-1.53	0.928	0.998	-1.01	4.07e-07	4.96e-05	-2.53	0.738	0.921	-1.05	0.732	0.976	1.06	Eef1a2	eukaryotic translation elongation factor 1 alpha 2 [Source:MGI Symbol;Acc:MGI:1096317]
ENSMUSG00000026817	0.127	0.558	-1.45	0.204	0.937	-1.31	0.000134	0.00247	-2.53	0.714	0.912	-1.08	0.68	0.966	-1.11	Ak1	adenylate kinase 1 [Source:MGI Symbol;Acc:MGI:87977]
ENSMUSG00000021221	0.00129	0.178	-1.89	0.0944	0.814	-1.31	6.56e-07	6.76e-05	-2.52	0.615	0.879	1.08	0.994	1	1	Dpf3	D4, zinc and double PHD fingers, family 3 [Source:MGI Symbol;Acc:MGI:1917377]
ENSMUSG00000050854	0.00954	0.293	10.4	0.203	0.936	2.51	0.0277	0.0929	5.75	0.422	0.784	1.83	0.616	0.957	1.66	Tmem125	transmembrane protein 125 [Source:MGI Symbol;Acc:MGI:1923409]
ENSMUSG00000000120	0.00955	0.293	4.26	0.0127	0.495	3	0.0228	0.0817	2.71	0.47	0.812	-1.47	0.262	0.924	2.36	Ngfr	nerve growth factor receptor (TNFR superfamily, member 16) [Source:MGI Symbol;Acc:MGI:97323]
ENSMUSG00000030592	0.217	0.651	-1.29	0.259	0.963	-1.23	1.98e-05	0.000695	-2.52	0.165	0.561	-1.28	0.283	0.928	-1.27	Ryr1	ryanodine receptor 1, skeletal muscle [Source:MGI Symbol;Acc:MGI:99659]
ENSMUSG00000038319	0.00428	0.23	-2.48	0.562	0.994	-1.19	0.00277	0.0188	-2.51	0.122	0.496	1.5	0.471	0.948	-1.26	Kcnh2	potassium voltage-gated channel, subfamily H (eag-related), member 2 [Source:MGI Symbol;Acc:MGI:1341722]
ENSMUSG00000029815	0.00969	0.294	-1.79	0.788	0.998	-1.05	0.0282	0.094	-1.56	0.0575	0.365	-1.43	0.718	0.971	-1.09	Malsu1	mitochondrial assembly of ribosomal large subunit 1 [Source:MGI Symbol;Acc:MGI:1922843]
ENSMUSG00000021340	0.00972	0.294	-1.43	0.842	0.998	-1.03	0.0181	0.0695	-1.34	0.21	0.614	-1.16	0.129	0.917	-1.26	Gpld1	glycosylphosphatidylinositol specific phospholipase D1 [Source:MGI Symbol;Acc:MGI:106604]
ENSMUSG00000032456	0.256	0.683	-1.28	0.732	0.998	-1.08	3.04e-05	0.000935	-2.51	0.186	0.587	-1.29	0.13	0.917	-1.45	Nmnat3	nicotinamide nucleotide adenylyltransferase 3 [Source:MGI Symbol;Acc:MGI:1921330]
ENSMUSG00000068205	0.001	0.171	-2.61	0.949	0.998	1.01	0.000192	0.00319	-2.5	0.0317	0.289	-1.52	0.7	0.969	1.12	Macrod2	MACRO domain containing 2 [Source:MGI Symbol;Acc:MGI:1920149]
ENSMUSG00000053164	0.00974	0.294	-3.41	0.0562	0.736	-2.13	0.269	0.44	1.68	0.672	0.897	-1.19	0.371	0.94	-1.48	Gpr21	G protein-coupled receptor 21 [Source:MGI Symbol;Acc:MGI:2441890]
ENSMUSG00000031708	0.109	0.539	-1.46	0.107	0.839	-1.4	0.000102	0.00204	-2.5	0.374	0.756	1.2	0.766	0.979	-1.08	Tecr	trans-2,3-enoyl-CoA reductase [Source:MGI Symbol;Acc:MGI:1915408]
ENSMUSG00000024600	0.0098	0.295	3.91	0.377	0.991	1.5	0.015	0.0609	3.38	0.271	0.672	1.56	0.431	0.946	-1.5	Slc27a6	solute carrier family 27 (fatty acid transporter), member 6 [Source:MGI Symbol;Acc:MGI:3036230]
ENSMUSG00000104369	0.00986	0.295	3.62	0.425	0.992	1.33	0.216	0.38	-1.5	0.66	0.893	1.18	0.867	0.99	1.08	Gm38082	predicted gene, 38082 [Source:MGI Symbol;Acc:MGI:5611310]
ENSMUSG00000021768	0.137	0.572	-1.31	0.33	0.987	-1.17	1.35e-06	0.000103	-2.5	0.0922	0.445	-1.3	0.174	0.918	-1.3	Dusp13	dual specificity phosphatase 13 [Source:MGI Symbol;Acc:MGI:1351599]
ENSMUSG00000093577	0.712	0.914	1.18	0.659	0.998	1.16	0.00408	0.0245	-2.5	0.238	0.644	1.41	0.673	0.965	1.19	Gm20632	predicted gene 20632 [Source:MGI Symbol;Acc:MGI:5313079]
ENSMUSG00000052516	0.493	0.823	1.31	0.777	0.998	1.1	0.495	0.658	1.26	0.000445	0.036	-3.55	0.113	0.917	2.15	Robo2	roundabout homolog 2 (Drosophila) [Source:MGI Symbol;Acc:MGI:1890110]
ENSMUSG00000038663	0.035	0.409	-1.37	0.432	0.992	-1.11	2.57e-08	7.75e-06	-2.48	0.132	0.515	-1.21	0.186	0.918	-1.23	Fsd2	fibronectin type III and SPRY domain containing 2 [Source:MGI Symbol;Acc:MGI:2444310]
ENSMUSG00000033400	0.0422	0.427	-1.44	0.212	0.942	-1.22	1.16e-06	9.51e-05	-2.48	0.226	0.634	-1.2	0.615	0.957	-1.1	Agl	amylo-1,6-glucosidase, 4-alpha-glucanotransferase [Source:MGI Symbol;Acc:MGI:1924809]
ENSMUSG00000020634	0.119	0.547	-1.35	0.739	0.998	-1.06	3.15e-06	0.000181	-2.48	0.00179	0.0764	-1.69	0.233	0.918	-1.27	Ubxn2a	UBX domain protein 2A [Source:MGI Symbol;Acc:MGI:2442310]
ENSMUSG00000003382	0.01	0.296	1.5	0.1	0.822	1.25	0.0267	0.0908	1.35	0.217	0.621	1.17	0.49	0.951	1.12	Etv3	ets variant 3 [Source:MGI Symbol;Acc:MGI:1350926]
ENSMUSG00000022464	0.156	0.592	-1.25	0.000275	0.107	-1.7	7.3e-08	1.43e-05	-2.48	0.00325	0.102	-1.5	0.203	0.918	-1.23	Slc38a4	solute carrier family 38, member 4 [Source:MGI Symbol;Acc:MGI:1916604]
ENSMUSG00000095438	0.274	0.697	-1.49	0.285	0.974	-1.43	0.0088	0.0421	-2.48	0.0486	0.341	-1.88	0.424	0.946	1.44	Gm21747	predicted gene, 21747 [Source:MGI Symbol;Acc:MGI:5433911]
ENSMUSG00000032578	0.0102	0.301	-4.65	0.34	0.99	1.59	0.132	0.27	-2.15	0.739	0.922	1.29	0.363	0.94	1.95	Cish	cytokine inducible SH2-containing protein [Source:MGI Symbol;Acc:MGI:103159]
ENSMUSG00000025213	0.329	0.729	-1.42	0.894	0.998	1.05	0.525	0.683	-1.2	0.000676	0.0454	-3.39	0.477	0.949	-1.43	Kazald1	Kazal-type serine peptidase inhibitor domain 1 [Source:MGI Symbol;Acc:MGI:2147606]
ENSMUSG00000018341	0.00919	0.292	-1.6	0.757	0.998	-1.05	8.18e-07	7.71e-05	-2.47	0.0353	0.301	-1.36	0.726	0.974	-1.07	Il12rb2	interleukin 12 receptor, beta 2 [Source:MGI Symbol;Acc:MGI:1270861]
ENSMUSG00000094724	0.0104	0.302	-3.97	0.12	0.861	-2.24	0.186	0.344	-1.93	0.523	0.839	1.31	0.571	0.955	-1.3	Rnaset2b	ribonuclease T2B [Source:MGI Symbol;Acc:MGI:3702087]
ENSMUSG00000048416	0.0431	0.429	-1.77	0.997	1	1	0.000833	0.00859	-2.47	0.954	0.989	1.01	0.517	0.952	1.21	Mlf1	myeloid leukemia factor 1 [Source:MGI Symbol;Acc:MGI:1341819]
ENSMUSG00000039197	0.0552	0.459	-1.46	0.187	0.928	-1.25	5.89e-06	0.000283	-2.47	0.0674	0.391	-1.36	0.246	0.923	-1.27	Adk	adenosine kinase [Source:MGI Symbol;Acc:MGI:87930]
ENSMUSG00000038670	0.0982	0.525	-1.49	0.641	0.997	-1.1	0.00016	0.00281	-2.47	0.809	0.949	-1.05	0.914	0.994	1.03	Mybpc2	myosin binding protein C, fast-type [Source:MGI Symbol;Acc:MGI:1336170]
ENSMUSG00000021676	0.0104	0.302	2.53	0.0879	0.81	1.49	0.236	0.402	-1.35	0.0963	0.454	1.79	0.439	0.946	1.4	Iqgap2	IQ motif containing GTPase activating protein 2 [Source:MGI Symbol;Acc:MGI:2449975]
ENSMUSG00000073412	0.0104	0.302	4.68	0.875	0.998	1.1	0.0218	0.0792	4	0.0289	0.278	3.39	0.638	0.96	-1.33	Lst1	leukocyte specific transcript 1 [Source:MGI Symbol;Acc:MGI:1096324]
ENSMUSG00000022357	0.165	0.602	-1.54	0.563	0.994	-1.17	0.00138	0.012	-2.47	0.00453	0.118	-2.1	0.00153	0.286	-2.92	Klhl38	kelch-like 38 [Source:MGI Symbol;Acc:MGI:3045310]
ENSMUSG00000075033	0.0105	0.303	2.85	0.971	0.999	1.01	0.0266	0.0905	1.95	0.378	0.759	-1.42	0.744	0.977	-1.17	Nxpe3	neurexophilin and PC-esterase domain family, member 3 [Source:MGI Symbol;Acc:MGI:2686598]
ENSMUSG00000039601	2.98e-05	0.0265	-2.04	0.0286	0.626	-1.36	6.71e-08	1.37e-05	-2.46	0.00705	0.149	-1.46	0.347	0.939	-1.17	Rcan2	regulator of calcineurin 2 [Source:MGI Symbol;Acc:MGI:1858219]
ENSMUSG00000038201	0.000951	0.167	-1.82	0.18	0.926	-1.23	7.07e-07	6.92e-05	-2.46	0.914	0.976	-1.02	0.992	0.999	-1	Kcna7	potassium voltage-gated channel, shaker-related subfamily, member 7 [Source:MGI Symbol;Acc:MGI:96664]
ENSMUSG00000039496	0.00343	0.221	-1.69	0.358	0.991	-1.15	5.95e-07	6.25e-05	-2.46	0.00435	0.116	-1.54	0.0343	0.867	-1.48	Cdnf	cerebral dopamine neurotrophic factor [Source:MGI Symbol;Acc:MGI:3606576]
ENSMUSG00000006435	0.00422	0.23	-1.54	0.927	0.998	-1.01	1.29e-08	5.01e-06	-2.46	0.702	0.909	1.05	0.432	0.946	-1.13	Neurl1a	neuralized E3 ubiquitin protein ligase 1A [Source:MGI Symbol;Acc:MGI:1334263]
ENSMUSG00000024505	0.0117	0.314	-1.79	0.115	0.857	-1.41	7.23e-05	0.0016	-2.46	0.0383	0.311	-1.51	0.865	0.99	1.05	Dtwd2	DTW domain containing 2 [Source:MGI Symbol;Acc:MGI:1916107]
ENSMUSG00000038244	0.0131	0.328	-1.46	0.321	0.986	1.14	3.13e-08	8.61e-06	-2.46	0.331	0.719	1.13	0.587	0.955	-1.09	Mical2	microtubule associated monooxygenase, calponin and LIM domain containing 2 [Source:MGI Symbol;Acc:MGI:2444947]
ENSMUSG00000026672	0.118	0.546	-1.41	0.0376	0.668	-1.5	3.23e-05	0.000969	-2.46	0.00868	0.165	-1.64	0.269	0.925	-1.28	Optn	optineurin [Source:MGI Symbol;Acc:MGI:1918898]
ENSMUSG00000043683	0.0143	0.331	-1.41	0.0276	0.626	-1.31	4.32e-09	2.76e-06	-2.45	0.0374	0.309	-1.28	0.0476	0.914	-1.34	Fem1a	feminization 1 homolog a (C. elegans) [Source:MGI Symbol;Acc:MGI:1335089]
ENSMUSG00000029575	0.135	0.569	-1.53	0.443	0.992	-1.21	0.000945	0.00936	-2.45	0.442	0.797	-1.2	0.209	0.918	-1.46	Mmab	methylmalonic aciduria (cobalamin deficiency) type B homolog (human) [Source:MGI Symbol;Acc:MGI:1924947]
ENSMUSG00000033182	0.198	0.634	-1.26	0.552	0.994	-1.1	8.26e-07	7.71e-05	-2.45	0.0341	0.296	-1.38	0.79	0.982	-1.05	Kbtbd12	kelch repeat and BTB (POZ) domain containing 12 [Source:MGI Symbol;Acc:MGI:1918481]
ENSMUSG00000017817	0.24	0.674	-1.28	0.471	0.992	-1.14	2.96e-05	0.000928	-2.45	0.3	0.696	-1.2	0.231	0.918	-1.3	Jph2	junctophilin 2 [Source:MGI Symbol;Acc:MGI:1891496]
ENSMUSG00000040648	0.0109	0.308	1.85	0.0859	0.808	1.45	0.0171	0.0668	1.69	0.239	0.645	1.3	0.15	0.918	1.61	Ppip5k2	diphosphoinositol pentakisphosphate kinase 2 [Source:MGI Symbol;Acc:MGI:2142810]
ENSMUSG00000030225	0.0111	0.312	-1.62	0.984	0.999	-1	0.183	0.339	-1.25	0.556	0.855	-1.1	0.261	0.924	1.29	Dera	2-deoxyribose-5-phosphate aldolase homolog (C. elegans) [Source:MGI Symbol;Acc:MGI:1913762]
ENSMUSG00000008822	0.00231	0.199	-2.14	0.334	0.987	1.24	8.7e-05	0.00182	-2.44	0.41	0.777	-1.18	0.971	0.998	1.01	Acyp1	acylphosphatase 1, erythrocyte (common) type [Source:MGI Symbol;Acc:MGI:1913454]
ENSMUSG00000020153	0.025	0.375	-2.16	0.752	0.998	-1.1	0.00589	0.0317	-2.44	0.517	0.837	-1.2	0.43	0.946	1.32	Ndufs7	NADH dehydrogenase (ubiquinone) Fe-S protein 7 [Source:MGI Symbol;Acc:MGI:1922656]
ENSMUSG00000022797	0.00962	0.294	-1.91	0.18	0.926	-1.34	0.000219	0.00352	-2.43	0.551	0.852	1.13	0.0247	0.819	1.79	Tfrc	transferrin receptor [Source:MGI Symbol;Acc:MGI:98822]
ENSMUSG00000053716	0.00976	0.294	-1.7	0.00488	0.362	-1.65	8.82e-06	0.000382	-2.43	0.517	0.837	1.11	0.876	0.992	1.03	Dusp7	dual specificity phosphatase 7 [Source:MGI Symbol;Acc:MGI:2387100]
ENSMUSG00000027378	0.109	0.539	-1.34	0.642	0.997	-1.08	1.22e-06	9.71e-05	-2.43	0.00157	0.0713	-1.64	0.141	0.917	-1.33	Nphp1	nephronophthisis 1 (juvenile) homolog (human) [Source:MGI Symbol;Acc:MGI:1858233]
ENSMUSG00000022358	0.868	0.967	1.05	0.902	0.998	1.04	0.00494	0.0281	-2.43	0.0123	0.192	-2.03	0.131	0.917	-1.67	Fbxo32	F-box protein 32 [Source:MGI Symbol;Acc:MGI:1914981]
ENSMUSG00000055917	0.0114	0.314	-1.64	0.101	0.824	1.34	0.135	0.274	-1.3	0.691	0.905	1.07	0.682	0.967	1.1	Zfp277	zinc finger protein 277 [Source:MGI Symbol;Acc:MGI:1890393]
ENSMUSG00000019763	0.0114	0.314	-1.5	0.303	0.984	1.15	0.404	0.577	-1.13	0.63	0.883	1.07	0.203	0.918	-1.24	Rmnd1	required for meiotic nuclear division 1 homolog (S. cerevisiae) [Source:MGI Symbol;Acc:MGI:1913334]
ENSMUSG00000025608	0.0114	0.314	-1.43	0.0837	0.802	-1.24	0.581	0.728	-1.07	0.0341	0.296	-1.29	0.273	0.925	-1.17	Podxl	podocalyxin-like [Source:MGI Symbol;Acc:MGI:1351317]
ENSMUSG00000034687	0.000915	0.164	-2.4	0.0688	0.767	-1.53	0.000542	0.00646	-2.42	0.908	0.975	-1.02	0.449	0.948	1.22	Fras1	Fraser syndrome 1 homolog (human) [Source:MGI Symbol;Acc:MGI:2385368]
ENSMUSG00000037922	0.0114	0.314	3.69	0.0822	0.801	2.15	0.0188	0.0714	3.2	0.0799	0.419	2.38	0.189	0.918	2.37	Bank1	B cell scaffold protein with ankyrin repeats 1 [Source:MGI Symbol;Acc:MGI:2442120]
ENSMUSG00000084929	0.00479	0.24	-2.03	0.875	0.998	1.03	0.000179	0.00304	-2.42	0.0468	0.337	1.49	0.104	0.917	1.49	Foxo6os	forkhead box O6, opposite strand [Source:MGI Symbol;Acc:MGI:3028036]
ENSMUSG00000055489	0.0642	0.481	-1.76	0.437	0.992	-1.23	0.00206	0.0154	-2.42	0.195	0.597	-1.39	0.645	0.96	1.15	Ano5	anoctamin 5 [Source:MGI Symbol;Acc:MGI:3576659]
ENSMUSG00000019891	0.0115	0.314	-1.84	0.87	0.998	1.04	0.496	0.658	-1.16	0.799	0.945	-1.06	0.912	0.994	1.03	Dcbld1	discoidin, CUB and LCCL domain containing 1 [Source:MGI Symbol;Acc:MGI:1913936]
ENSMUSG00000045776	0.364	0.755	-1.37	0.0165	0.524	2.12	0.00859	0.0414	-2.42	0.00212	0.0845	2.57	0.3	0.934	1.46	Lrtm1	leucine-rich repeats and transmembrane domains 1 [Source:MGI Symbol;Acc:MGI:2442106]
ENSMUSG00000028950	0.000513	0.122	-4.03	0.717	0.998	1.12	0.00669	0.0348	-2.41	0.00673	0.146	2.23	0.0536	0.917	2.39	Tas1r1	taste receptor, type 1, member 1 [Source:MGI Symbol;Acc:MGI:1927505]
ENSMUSG00000029408	0.00196	0.194	-1.88	0.849	0.998	-1.04	3.09e-06	0.00018	-2.41	0.915	0.976	1.02	0.99	0.999	-1	Abcb9	ATP-binding cassette, sub-family B (MDR/TAP), member 9 [Source:MGI Symbol;Acc:MGI:1861729]
ENSMUSG00000047022	0.0116	0.314	-2.34	0.648	0.998	1.13	0.0612	0.161	-1.65	0.854	0.959	-1.05	0.823	0.987	1.08	Mipol1	mirror-image polydactyly gene 1 homolog (human) [Source:MGI Symbol;Acc:MGI:1920740]
ENSMUSG00000020056	0.0116	0.314	-1.94	0.77	0.998	-1.07	0.659	0.788	-1.11	0.561	0.857	-1.13	0.375	0.941	1.32	Ccdc53	coiled-coil domain containing 53 [Source:MGI Symbol;Acc:MGI:1914532]
ENSMUSG00000039178	0.00563	0.252	-1.63	0.0061	0.383	-1.53	3.37e-07	4.26e-05	-2.41	0.525	0.84	-1.09	0.35	0.939	-1.18	Tbc1d19	TBC1 domain family, member 19 [Source:MGI Symbol;Acc:MGI:1914499]
ENSMUSG00000024247	0.138	0.574	-1.41	0.0768	0.782	-1.44	0.000125	0.00236	-2.41	0.156	0.55	-1.32	0.58	0.955	1.14	Pkdcc	protein kinase domain containing, cytoplasmic [Source:MGI Symbol;Acc:MGI:2147077]
ENSMUSG00000045201	0.667	0.897	1.16	0.257	0.963	-1.44	0.00392	0.0238	-2.41	0.537	0.844	1.25	0.728	0.975	-1.18	Lrrc3b	leucine rich repeat containing 3B [Source:MGI Symbol;Acc:MGI:2384996]
ENSMUSG00000064345	0.00145	0.183	-2.04	0.555	0.994	1.12	4.96e-05	0.00125	-2.4	0.17	0.565	-1.28	0.855	0.989	1.04	mt-Nd2	mitochondrially encoded NADH dehydrogenase 2 [Source:MGI Symbol;Acc:MGI:102500]
ENSMUSG00000027470	0.00531	0.246	-1.8	0.016	0.523	-1.56	3.17e-05	0.000956	-2.4	0.00264	0.094	-1.74	0.00351	0.407	-1.93	Mylk2	myosin, light polypeptide kinase 2, skeletal muscle [Source:MGI Symbol;Acc:MGI:2139434]
ENSMUSG00000055239	0.00753	0.273	-1.58	0.26	0.963	-1.18	5.64e-07	6.09e-05	-2.4	0.018	0.229	-1.41	0.261	0.924	-1.22	Kcmf1	potassium channel modulatory factor 1 [Source:MGI Symbol;Acc:MGI:1921537]
ENSMUSG00000030209	0.0117	0.314	3.94	0.461	0.992	1.42	0.261	0.431	-1.57	0.843	0.957	1.09	0.59	0.955	-1.3	Grin2b	glutamate receptor, ionotropic, NMDA2B (epsilon 2) [Source:MGI Symbol;Acc:MGI:95821]
ENSMUSG00000103940	0.0117	0.314	4.34	0.167	0.92	1.9	0.885	0.937	-1.07	0.0161	0.219	-2.55	0.349	0.939	-1.71	Gm38227	predicted gene, 38227 [Source:MGI Symbol;Acc:MGI:5611455]
ENSMUSG00000083669	0.0118	0.314	-3.83	0.434	0.992	-1.46	0.24	0.406	-1.69	0.375	0.757	-1.53	0.331	0.938	1.85	Gm10169	predicted pseudogene 10169 [Source:MGI Symbol;Acc:MGI:3642393]
ENSMUSG00000004748	0.0254	0.376	-1.98	0.84	0.998	-1.05	0.00129	0.0114	-2.4	0.637	0.886	-1.12	0.393	0.944	1.32	Mtfp1	mitochondrial fission process 1 [Source:MGI Symbol;Acc:MGI:1916686]
ENSMUSG00000030774	0.11	0.54	-1.42	0.128	0.869	-1.35	7.31e-05	0.00161	-2.4	0.156	0.55	1.32	0.589	0.955	1.14	Pak1	p21 protein (Cdc42/Rac)-activated kinase 1 [Source:MGI Symbol;Acc:MGI:1339975]
ENSMUSG00000006715	0.125	0.556	-1.57	0.326	0.987	-1.28	0.00135	0.0118	-2.4	0.674	0.898	-1.12	0.174	0.918	-1.59	Gmnn	geminin [Source:MGI Symbol;Acc:MGI:1927344]
ENSMUSG00000038210	0.295	0.712	1.45	0.458	0.992	-1.27	0.00278	0.0189	-2.4	0.408	0.776	1.27	0.246	0.923	-1.55	Hoxa11	homeobox A11 [Source:MGI Symbol;Acc:MGI:96172]
ENSMUSG00000023052	0.0118	0.314	2.84	0.876	0.998	-1.06	0.324	0.5	-1.36	0.477	0.816	1.23	0.91	0.994	-1.04	Npff	neuropeptide FF-amide peptide precursor [Source:MGI Symbol;Acc:MGI:1891708]
ENSMUSG00000030657	0.637	0.883	1.17	0.88	0.998	1.04	0.00284	0.0191	-2.4	0.924	0.979	1.03	0.554	0.955	1.2	Xylt1	xylosyltransferase 1 [Source:MGI Symbol;Acc:MGI:2451073]
ENSMUSG00000079110	0.0184	0.341	-1.51	0.0519	0.722	-1.35	1.23e-06	9.71e-05	-2.39	0.0669	0.39	-1.31	0.0925	0.917	-1.36	Capn3	calpain 3 [Source:MGI Symbol;Acc:MGI:107437]
ENSMUSG00000045064	0.012	0.317	-2.04	0.186	0.928	-1.41	0.0202	0.0751	-1.77	0.966	0.991	1.01	0.988	0.999	1	Zc2hc1c	zinc finger, C2HC-type containing 1C [Source:MGI Symbol;Acc:MGI:1919600]
ENSMUSG00000051065	0.205	0.64	-1.29	0.388	0.991	-1.16	1.22e-06	9.71e-05	-2.39	0.00478	0.122	-1.58	0.0448	0.91	-1.55	Mb21d2	Mab-21 domain containing 2 [Source:MGI Symbol;Acc:MGI:1917028]
ENSMUSG00000067653	0.332	0.731	-1.34	0.19	0.929	1.42	0.122	0.256	-1.54	2.84e-05	0.00629	-3.26	0.195	0.918	-1.53	Ankrd23	ankyrin repeat domain 23 [Source:MGI Symbol;Acc:MGI:1925571]
ENSMUSG00000043336	0.127	0.559	-1.31	0.866	0.998	1.03	1.78e-06	0.000127	-2.38	0.149	0.54	-1.25	0.61	0.956	-1.1	Filip1l	filamin A interacting protein 1-like [Source:MGI Symbol;Acc:MGI:1925999]
ENSMUSG00000047419	0.244	0.674	-1.24	0.188	0.928	-1.24	7.08e-06	0.000324	-2.38	0.0532	0.353	-1.37	0.391	0.944	-1.18	Cmya5	cardiomyopathy associated 5 [Source:MGI Symbol;Acc:MGI:1923719]
ENSMUSG00000020402	0.00233	0.199	-1.65	0.231	0.951	-1.18	3.03e-07	4e-05	-2.37	0.192	0.593	-1.19	0.497	0.952	-1.12	Vdac1	voltage-dependent anion channel 1 [Source:MGI Symbol;Acc:MGI:106919]
ENSMUSG00000044788	0.119	0.547	-1.38	0.663	0.998	1.08	1.06e-05	0.000443	-2.37	0.02	0.24	-1.46	0.512	0.952	-1.14	Fads6	fatty acid desaturase domain family, member 6 [Source:MGI Symbol;Acc:MGI:3039592]
ENSMUSG00000017300	0.139	0.574	-1.63	0.491	0.993	-1.22	0.00538	0.0297	-2.37	0.354	0.741	-1.29	0.717	0.971	-1.13	Tnnc2	troponin C2, fast [Source:MGI Symbol;Acc:MGI:98780]
ENSMUSG00000047866	0.0125	0.324	-1.44	0.157	0.906	-1.2	0.0125	0.0537	-1.4	0.147	0.537	-1.19	0.365	0.94	-1.15	Lonp2	lon peptidase 2, peroxisomal [Source:MGI Symbol;Acc:MGI:1914137]
ENSMUSG00000034792	0.0125	0.324	5.1	0.312	0.986	1.73	0.136	0.276	2.47	0.533	0.843	1.41	0.545	0.955	1.58	Gna15	guanine nucleotide binding protein, alpha 15 [Source:MGI Symbol;Acc:MGI:95770]
ENSMUSG00000026500	0.0126	0.326	-5.58	0.265	0.964	2.01	0.041	0.122	-3.24	0.156	0.55	2.35	0.566	0.955	1.57	Cox20	COX20 Cox2 chaperone [Source:MGI Symbol;Acc:MGI:1913609]
ENSMUSG00000026824	0.979	0.998	1.01	0.0131	0.497	-2.03	0.00833	0.0406	-2.37	0.0132	0.201	-2.45	0.239	0.921	-1.63	Kcnj3	potassium inwardly-rectifying channel, subfamily J, member 3 [Source:MGI Symbol;Acc:MGI:104742]
ENSMUSG00000020307	0.00881	0.288	-1.77	0.674	0.998	-1.08	4.87e-05	0.00124	-2.36	0.264	0.666	-1.22	0.59	0.955	-1.13	Cdc34	cell division cycle 34 [Source:MGI Symbol;Acc:MGI:102657]
ENSMUSG00000024645	0.0127	0.326	-1.58	0.214	0.942	-1.22	0.188	0.346	-1.24	0.256	0.66	-1.19	0.321	0.936	1.23	Timm21	tranlocase of inner mitochondrial membrane 21 [Source:MGI Symbol;Acc:MGI:1920595]
ENSMUSG00000030682	0.0127	0.326	-1.55	0.0533	0.726	-1.35	0.0155	0.0625	-1.47	0.112	0.479	1.26	0.368	0.94	1.18	Cdipt	CDP-diacylglycerol--inositol 3-phosphatidyltransferase (phosphatidylinositol synthase) [Source:MGI Symbol;Acc:MGI:105491]
ENSMUSG00000035064	0.0248	0.374	-1.58	0.41	0.992	-1.16	2.26e-05	0.000762	-2.36	0.715	0.912	1.06	0.421	0.946	-1.18	Eef2k	eukaryotic elongation factor-2 kinase [Source:MGI Symbol;Acc:MGI:1195261]
ENSMUSG00000017713	0.545	0.848	-1.21	0.889	0.998	1.04	0.000784	0.00823	-2.36	0.794	0.942	-1.07	0.8	0.984	1.09	Tha1	threonine aldolase 1 [Source:MGI Symbol;Acc:MGI:1919026]
ENSMUSG00000055737	0.0172	0.339	-1.6	0.961	0.998	-1.01	1.43e-05	0.000553	-2.35	0.0381	0.31	-1.41	0.257	0.924	-1.26	Ghr	growth hormone receptor [Source:MGI Symbol;Acc:MGI:95708]
ENSMUSG00000037234	0.0214	0.359	-1.56	0.229	0.951	-1.22	9.47e-06	0.000405	-2.35	0.117	0.487	-1.29	0.8	0.984	1.05	Hook3	hook homolog 3 (Drosophila) [Source:MGI Symbol;Acc:MGI:2443554]
ENSMUSG00000045282	0.0128	0.326	2.44	0.358	0.991	1.29	0.0809	0.194	1.66	0.522	0.839	1.17	0.401	0.945	1.36	Tmem86b	transmembrane protein 86B [Source:MGI Symbol;Acc:MGI:1915505]
ENSMUSG00000103774	0.0128	0.327	4.85	0.0495	0.714	3.07	0.022	0.0798	3.14	0.372	0.755	1.64	0.21	0.918	2.55	Gm36932	predicted gene, 36932 [Source:MGI Symbol;Acc:MGI:5610160]
ENSMUSG00000040424	0.307	0.718	-1.29	0.564	0.994	-1.14	0.000743	0.00793	-2.35	0.525	0.84	-1.13	0.376	0.941	-1.26	Hipk4	homeodomain interacting protein kinase 4 [Source:MGI Symbol;Acc:MGI:2685008]
ENSMUSG00000042529	0.518	0.835	-1.16	0.016	0.523	-1.62	0.000113	0.00219	-2.35	0.745	0.924	-1.06	0.516	0.952	-1.16	Kcnj12	potassium inwardly-rectifying channel, subfamily J, member 12 [Source:MGI Symbol;Acc:MGI:108495]
ENSMUSG00000060639	0.013	0.328	-2.33	0.254	0.963	1.35	0.0172	0.0672	-1.96	0.405	0.774	1.22	0.102	0.917	1.75	Hist1h4i	histone cluster 1, H4i [Source:MGI Symbol;Acc:MGI:2448432]
ENSMUSG00000032192	0.013	0.328	-1.94	0.735	0.998	-1.09	0.026	0.0894	-1.67	0.815	0.95	-1.05	0.795	0.984	1.08	Gnb5	guanine nucleotide binding protein (G protein), beta 5 [Source:MGI Symbol;Acc:MGI:101848]
ENSMUSG00000025271	0.000354	0.109	-2.05	0.617	0.996	-1.09	9.33e-06	0.0004	-2.34	0.0174	0.226	-1.49	0.0723	0.917	-1.44	Pfkfb1	6-phosphofructo-2-kinase/fructose-2,6-biphosphatase 1 [Source:MGI Symbol;Acc:MGI:107816]
ENSMUSG00000018906	0.0209	0.356	-1.57	0.00803	0.416	-1.6	5.82e-06	0.000281	-2.34	0.0406	0.318	-1.38	0.483	0.95	-1.15	P4ha2	procollagen-proline, 2-oxoglutarate 4-dioxygenase (proline 4-hydroxylase), alpha II polypeptide [Source:MGI Symbol;Acc:MGI:894286]
ENSMUSG00000045281	0.0131	0.328	-3.73	0.542	0.994	1.33	0.0313	0.101	3.04	0.442	0.797	1.42	0.116	0.917	-2.34	Gpr20	G protein-coupled receptor 20 [Source:MGI Symbol;Acc:MGI:2441803]
ENSMUSG00000065990	0.0131	0.328	-2.25	0.509	0.994	-1.21	0.0385	0.117	-1.82	0.624	0.881	-1.14	0.307	0.934	1.47	Aurkaip1	aurora kinase A interacting protein 1 [Source:MGI Symbol;Acc:MGI:1913327]
ENSMUSG00000051747	0.134	0.567	-1.3	0.769	0.998	1.05	3.32e-06	0.000186	-2.34	0.00937	0.171	-1.49	0.82	0.987	1.04	Ttn	titin [Source:MGI Symbol;Acc:MGI:98864]
ENSMUSG00000023826	0.405	0.775	-1.25	0.0102	0.467	-1.72	0.000352	0.00484	-2.34	0.399	0.772	-1.2	0.321	0.936	1.33	Park2	Parkinson disease (autosomal recessive, juvenile) 2, parkin [Source:MGI Symbol;Acc:MGI:1355296]
ENSMUSG00000028572	0.471	0.811	-1.18	0.142	0.888	1.34	0.000158	0.00278	-2.34	0.462	0.808	-1.15	0.799	0.984	1.06	Hook1	hook homolog 1 (Drosophila) [Source:MGI Symbol;Acc:MGI:1925213]
ENSMUSG00000021090	0.0132	0.329	3.58	0.0137	0.51	2.9	0.0209	0.077	2.68	0.29	0.689	1.55	0.311	0.935	1.76	Lrrc9	leucine rich repeat containing 9 [Source:MGI Symbol;Acc:MGI:1925507]
ENSMUSG00000037493	0.0333	0.406	-1.68	0.119	0.861	-1.39	0.000354	0.00486	-2.33	0.276	0.677	-1.25	0.97	0.998	1.01	Cib2	calcium and integrin binding family member 2 [Source:MGI Symbol;Acc:MGI:1929293]
ENSMUSG00000004319	0.0572	0.464	-1.44	0.0967	0.818	-1.32	1.11e-05	0.000456	-2.33	0.00245	0.0907	-1.66	0.0581	0.917	-1.47	Clcn3	chloride channel, voltage-sensitive 3 [Source:MGI Symbol;Acc:MGI:103555]
ENSMUSG00000087221	0.202	0.638	-1.47	0.473	0.992	-1.19	0.00406	0.0244	-2.17	0.000419	0.035	-3.18	0.588	0.955	-1.21	BC037032	cDNA Sequence BC037032 [Source:MGI Symbol;Acc:MGI:3040924]
ENSMUSG00000086610	0.127	0.559	-1.52	0.0233	0.604	-1.7	0.000555	0.00656	-2.33	0.886	0.969	-1.03	0.505	0.952	-1.24	Gm15408	predicted gene 15408 [Source:MGI Symbol;Acc:MGI:3705101]
ENSMUSG00000028766	0.165	0.602	-1.37	0.0111	0.467	-1.69	6.01e-05	0.00142	-2.33	0.817	0.95	1.04	0.955	0.997	-1.01	Alpl	alkaline phosphatase, liver/bone/kidney [Source:MGI Symbol;Acc:MGI:87983]
ENSMUSG00000032495	0.0689	0.49	1.44	0.951	0.998	-1.01	0.0985	0.222	1.36	1.2e-08	1.6e-05	-3.13	7.79e-06	0.00888	-2.82	Lrrc2	leucine rich repeat containing 2 [Source:MGI Symbol;Acc:MGI:1921499]
ENSMUSG00000055368	0.0134	0.329	2.95	0.0998	0.822	1.79	0.56	0.711	1.2	0.167	0.563	-1.62	0.907	0.994	-1.05	Slc6a2	solute carrier family 6 (neurotransmitter transporter, noradrenalin), member 2 [Source:MGI Symbol;Acc:MGI:1270850]
ENSMUSG00000037685	0.171	0.609	-1.35	0.213	0.942	-1.27	0.000124	0.00235	-2.33	0.0014	0.0667	-1.87	0.544	0.955	-1.15	Atp8a1	ATPase, aminophospholipid transporter (APLT), class I, type 8A, member 1 [Source:MGI Symbol;Acc:MGI:1330848]
ENSMUSG00000032171	0.0135	0.329	-1.61	0.767	0.998	-1.05	0.0206	0.0763	-1.5	0.558	0.855	-1.1	0.67	0.964	1.09	Pin1	protein (peptidyl-prolyl cis/trans isomerase) NIMA-interacting 1 [Source:MGI Symbol;Acc:MGI:1346036]
ENSMUSG00000024726	0.321	0.725	-1.29	0.678	0.998	-1.09	0.000559	0.0066	-2.33	0.956	0.989	1.01	0.733	0.976	-1.09	Carnmt1	carnosine N-methyltransferase 1 [Source:MGI Symbol;Acc:MGI:1914633]
ENSMUSG00000101086	0.354	0.746	-1.35	0.295	0.981	-1.33	0.00175	0.014	-2.33	0.000984	0.0569	-2.61	0.207	0.918	-1.5	Gm28651	predicted gene 28651 [Source:MGI Symbol;Acc:MGI:5579357]
ENSMUSG00000045466	0.721	0.917	-1.08	0.805	0.998	-1.05	1.95e-05	0.000686	-2.33	0.115	0.485	-1.33	0.0036	0.407	-2.05	Zfp956	zinc finger protein 956 [Source:MGI Symbol;Acc:MGI:2141515]
ENSMUSG00000027384	0.021	0.356	-1.68	0.884	0.998	-1.03	9.09e-05	0.00187	-2.32	0.203	0.604	-1.26	0.365	0.94	-1.23	Ndufaf5	NADH dehydrogenase (ubiquinone) complex I, assembly factor 5 [Source:MGI Symbol;Acc:MGI:1916737]
ENSMUSG00000036880	0.0136	0.329	-1.47	0.741	0.998	-1.04	0.0134	0.0564	-1.43	0.971	0.993	1	0.582	0.955	1.09	Acaa2	acetyl-Coenzyme A acyltransferase 2 (mitochondrial 3-oxoacyl-Coenzyme A thiolase) [Source:MGI Symbol;Acc:MGI:1098623]
ENSMUSG00000017009	0.0136	0.329	1.7	0.928	0.998	1.02	0.0122	0.0527	1.62	0.669	0.897	-1.08	0.61	0.956	-1.12	Sdc4	syndecan 4 [Source:MGI Symbol;Acc:MGI:1349164]
ENSMUSG00000067851	0.034	0.409	-1.51	0.882	0.998	-1.03	1.58e-05	0.000596	-2.32	0.285	0.684	-1.19	0.848	0.988	-1.04	Arfgef1	ADP-ribosylation factor guanine nucleotide-exchange factor 1(brefeldin A-inhibited) [Source:MGI Symbol;Acc:MGI:2442988]
ENSMUSG00000032294	0.0386	0.419	-1.58	0.582	0.994	-1.11	0.000126	0.00236	-2.32	0.556	0.855	1.12	0.88	0.992	1.03	Pkm	pyruvate kinase, muscle [Source:MGI Symbol;Acc:MGI:97591]
ENSMUSG00000026627	0.0136	0.329	2.5	0.449	0.992	1.27	0.0707	0.177	1.77	0.0668	0.39	1.76	0.161	0.918	1.9	Tmem206	transmembrane protein 206 [Source:MGI Symbol;Acc:MGI:1914200]
ENSMUSG00000068587	0.0136	0.329	4.41	0.0473	0.711	2.87	0.045	0.13	2.52	0.00924	0.17	3.7	0.875	0.992	1.09	Mgam	maltase-glucoamylase [Source:MGI Symbol;Acc:MGI:1203495]
ENSMUSG00000036957	0.082	0.504	-1.47	0.203	0.937	-1.29	5.96e-05	0.00141	-2.32	0.156	0.55	-1.3	0.676	0.965	-1.12	Lrfn3	leucine rich repeat and fibronectin type III domain containing 3 [Source:MGI Symbol;Acc:MGI:2442512]
ENSMUSG00000074818	0.146	0.585	-1.53	0.792	0.998	-1.07	0.00207	0.0155	-2.32	0.309	0.703	-1.29	0.418	0.946	-1.3	Pdzd7	PDZ domain containing 7 [Source:MGI Symbol;Acc:MGI:3608325]
ENSMUSG00000026062	0.00246	0.199	-1.73	0.992	1	-1	2.48e-06	0.000156	-2.31	0.0616	0.376	-1.32	0.711	0.971	1.07	Slc9a2	solute carrier family 9 (sodium/hydrogen exchanger), member 2 [Source:MGI Symbol;Acc:MGI:105075]
ENSMUSG00000042476	0.0032	0.218	-1.73	0.0205	0.581	-1.45	5.13e-06	0.000258	-2.31	0.00629	0.142	-1.53	0.264	0.925	-1.23	Abcb4	ATP-binding cassette, sub-family B (MDR/TAP), member 4 [Source:MGI Symbol;Acc:MGI:97569]
ENSMUSG00000027820	0.0137	0.329	1.79	0.644	0.997	1.09	0.014	0.0582	1.68	0.53	0.842	1.13	0.913	0.994	1.03	Mme	membrane metallo endopeptidase [Source:MGI Symbol;Acc:MGI:97004]
ENSMUSG00000035095	0.0138	0.329	-2.29	0.609	0.995	-1.2	0.595	0.739	1.19	0.597	0.872	1.19	0.891	0.992	1.06	Fam167a	family with sequence similarity 167, member A [Source:MGI Symbol;Acc:MGI:3606565]
ENSMUSG00000031782	0.0047	0.238	-1.6	0.987	0.999	1	7.92e-07	7.53e-05	-2.31	0.256	0.66	-1.17	0.962	0.998	-1.01	Coq9	coenzyme Q9 homolog (yeast) [Source:MGI Symbol;Acc:MGI:1915164]
ENSMUSG00000083567	0.00669	0.266	-2.43	0.969	0.999	1.01	0.00454	0.0264	-2.31	0.154	0.546	-1.45	0.266	0.925	1.53	Gm11451	predicted gene 11451 [Source:MGI Symbol;Acc:MGI:3705412]
ENSMUSG00000024914	0.052	0.453	-1.57	0.207	0.938	-1.29	0.000241	0.00374	-2.31	0.41	0.777	-1.17	0.912	0.994	1.03	Drap1	Dr1 associated protein 1 (negative cofactor 2 alpha) [Source:MGI Symbol;Acc:MGI:1913806]
ENSMUSG00000002908	0.0538	0.456	-1.78	0.702	0.998	1.1	0.00287	0.0192	-2.31	0.869	0.963	-1.04	0.817	0.987	1.08	Kcnn1	potassium intermediate/small conductance calcium-activated channel, subfamily N, member 1 [Source:MGI Symbol;Acc:MGI:1933993]
ENSMUSG00000016833	0.0139	0.329	-2.93	0.967	0.999	1.02	0.56	0.711	-1.26	0.874	0.965	-1.06	0.617	0.957	1.32	Mrps18c	mitochondrial ribosomal protein S18C [Source:MGI Symbol;Acc:MGI:1915985]
ENSMUSG00000037098	0.0748	0.496	-1.33	0.084	0.803	-1.28	6.26e-07	6.53e-05	-2.31	0.179	0.576	-1.2	0.0433	0.91	-1.41	Rab11fip3	RAB11 family interacting protein 3 (class II) [Source:MGI Symbol;Acc:MGI:2444431]
ENSMUSG00000003153	0.27	0.694	-1.48	0.0149	0.523	-2.22	0.00582	0.0314	-2.31	0.392	0.768	1.27	0.358	0.94	-1.37	Slc2a3	solute carrier family 2 (facilitated glucose transporter), member 3 [Source:MGI Symbol;Acc:MGI:95757]
ENSMUSG00000025899	0.779	0.94	-1.06	0.288	0.976	-1.21	3.86e-05	0.00108	-2.31	0.04	0.316	-1.45	0.911	0.994	1.03	Alkbh8	alkB, alkylation repair homolog 8 (E. coli) [Source:MGI Symbol;Acc:MGI:1914917]
ENSMUSG00000034509	0.0139	0.329	-1.68	0.604	0.995	1.1	0.0591	0.157	-1.41	0.657	0.893	-1.08	0.176	0.918	1.42	Mad2l1bp	MAD2L1 binding protein [Source:MGI Symbol;Acc:MGI:1913841]
ENSMUSG00000031214	0.0139	0.329	1.46	0.639	0.997	-1.07	0.0208	0.0769	1.38	0.999	1	-1	0.694	0.968	1.07	Ophn1	oligophrenin 1 [Source:MGI Symbol;Acc:MGI:2151070]
ENSMUSG00000020629	0.0148	0.331	-1.45	0.0756	0.777	-1.26	9.65e-08	1.67e-05	-2.3	0.0176	0.227	-1.35	0.255	0.923	-1.19	Adi1	acireductone dioxygenase 1 [Source:MGI Symbol;Acc:MGI:2144929]
ENSMUSG00000020185	0.014	0.329	3.21	0.692	0.998	-1.18	0.0779	0.189	1.98	0.294	0.692	1.47	0.569	0.955	1.33	E2f7	E2F transcription factor 7 [Source:MGI Symbol;Acc:MGI:1289147]
ENSMUSG00000047454	0.018	0.339	-1.63	0.0727	0.772	-1.38	3.8e-05	0.00107	-2.3	0.0208	0.244	-1.5	0.122	0.917	-1.39	Gphn	gephyrin [Source:MGI Symbol;Acc:MGI:109602]
ENSMUSG00000073535	0.088	0.512	-1.72	0.67	0.998	-1.11	0.00194	0.0149	-2.3	0.21	0.614	-1.32	0.631	0.959	-1.16	Gm5532	predicted gene 5532 [Source:MGI Symbol;Acc:MGI:3646828]
ENSMUSG00000040666	0.206	0.641	-1.39	0.196	0.934	-1.35	0.00109	0.0102	-2.3	0.388	0.765	-1.21	0.193	0.918	-1.43	Sh3bgr	SH3-binding domain glutamic acid-rich protein [Source:MGI Symbol;Acc:MGI:1354740]
ENSMUSG00000089075	0.278	0.699	1.54	0.0603	0.743	1.94	0.00828	0.0404	-2.3	0.471	0.812	1.25	0.289	0.928	1.56	Gm23820	predicted gene, 23820 [Source:MGI Symbol;Acc:MGI:5453597]
ENSMUSG00000030956	0.0176	0.339	-1.33	0.0637	0.753	-1.21	1.43e-10	2.96e-07	-2.29	0.634	0.885	-1.05	0.0433	0.91	-1.29	Fam53b	family with sequence similarity 53, member B [Source:MGI Symbol;Acc:MGI:1925188]
ENSMUSG00000011305	0.104	0.53	-1.53	0.894	0.998	1.03	0.000926	0.00923	-2.29	0.113	0.481	-1.44	0.466	0.948	-1.23	Plin5	perilipin 5 [Source:MGI Symbol;Acc:MGI:1914218]
ENSMUSG00000106019	0.178	0.615	-1.44	0.268	0.967	1.29	0.00106	0.0101	-2.29	0.194	0.595	1.33	0.49	0.95	1.2	Gm43672	predicted gene 43672 [Source:MGI Symbol;Acc:MGI:5663809]
ENSMUSG00000019996	0.458	0.804	-1.23	0.349	0.99	-1.22	0.000468	0.00584	-2.29	0.713	0.911	-1.09	0.0458	0.91	-1.7	Map7	microtubule-associated protein 7 [Source:MGI Symbol;Acc:MGI:1328328]
ENSMUSG00000031533	0.0143	0.331	-1.53	0.853	0.998	1.03	0.391	0.566	-1.14	0.699	0.908	-1.06	0.845	0.988	1.04	Mrps31	mitochondrial ribosomal protein S31 [Source:MGI Symbol;Acc:MGI:1913153]
ENSMUSG00000019478	0.00733	0.272	-1.95	0.455	0.992	-1.21	0.00057	0.0067	-2.28	0.634	0.885	-1.1	0.889	0.992	-1.04	Rab4a	RAB4A, member RAS oncogene family [Source:MGI Symbol;Acc:MGI:105069]
ENSMUSG00000034334	0.0143	0.331	1.92	0.918	0.998	-1.02	0.122	0.257	1.43	0.26	0.664	1.29	0.307	0.934	-1.31	Fam151b	family with sequence similarity 151, member B [Source:MGI Symbol;Acc:MGI:1921192]
ENSMUSG00000019737	0.0143	0.331	2.84	0.544	0.994	-1.23	0.463	0.63	1.22	0.537	0.844	-1.2	0.793	0.983	-1.11	Syne4	spectrin repeat containing, nuclear envelope family member 4 [Source:MGI Symbol;Acc:MGI:2141950]
ENSMUSG00000026827	0.0298	0.392	-1.58	0.224	0.949	-1.25	6.44e-05	0.00148	-2.28	0.00203	0.0824	-1.75	0.079	0.917	-1.46	Gpd2	glycerol phosphate dehydrogenase 2, mitochondrial [Source:MGI Symbol;Acc:MGI:99778]
ENSMUSG00000032042	0.0323	0.403	-1.45	0.421	0.992	-1.13	3.05e-06	0.00018	-2.28	0.0335	0.294	-1.37	0.104	0.917	-1.34	Srpr	signal recognition particle receptor ('docking protein') [Source:MGI Symbol;Acc:MGI:1914648]
ENSMUSG00000036061	0.0144	0.331	-1.35	0.326	0.987	-1.11	0.518	0.677	-1.07	0.381	0.76	1.09	0.196	0.918	1.19	Smug1	single-strand selective monofunctional uracil DNA glycosylase [Source:MGI Symbol;Acc:MGI:1918976]
ENSMUSG00000023990	0.0373	0.414	-1.54	0.962	0.998	1.01	3.47e-05	0.00101	-2.28	0.989	0.998	1	0.791	0.983	1.06	Tfeb	transcription factor EB [Source:MGI Symbol;Acc:MGI:103270]
ENSMUSG00000025537	0.235	0.669	-1.45	0.911	0.998	-1.03	0.00609	0.0325	-2.28	0.589	0.869	-1.15	0.815	0.987	-1.08	Phkg1	phosphorylase kinase gamma 1 [Source:MGI Symbol;Acc:MGI:97579]
ENSMUSG00000050132	0.0144	0.331	3.38	0.92	0.998	-1.04	0.623	0.761	1.21	0.202	0.604	-1.68	0.0447	0.91	3.71	Sarm1	sterile alpha and HEAT/Armadillo motif containing 1 [Source:MGI Symbol;Acc:MGI:2136419]
ENSMUSG00000001983	0.00274	0.204	-1.66	0.662	0.998	-1.06	1.23e-06	9.71e-05	-2.27	0.192	0.593	-1.2	0.493	0.952	-1.12	Taco1	translational activator of mitochondrially encoded cytochrome c oxidase I [Source:MGI Symbol;Acc:MGI:1917457]
ENSMUSG00000028402	0.00685	0.267	-1.56	0.0662	0.76	-1.3	1.02e-06	9.01e-05	-2.27	0.0674	0.391	-1.29	0.428	0.946	-1.14	Mpdz	multiple PDZ domain protein [Source:MGI Symbol;Acc:MGI:1343489]
ENSMUSG00000024104	0.0145	0.331	1.42	0.198	0.934	1.17	0.248	0.416	1.16	0.166	0.562	1.18	0.898	0.994	1.02	Fam21	family with sequence similarity 21 [Source:MGI Symbol;Acc:MGI:106463]
ENSMUSG00000028278	0.00881	0.288	-1.54	0.0665	0.761	-1.3	1.14e-06	9.45e-05	-2.27	0.165	0.561	-1.21	0.574	0.955	-1.1	Rragd	Ras-related GTP binding D [Source:MGI Symbol;Acc:MGI:1098604]
ENSMUSG00000028878	0.0146	0.331	-1.62	0.0994	0.822	-1.33	0.0163	0.0647	-1.54	0.206	0.609	-1.23	0.685	0.967	-1.09	Fam76a	family with sequence similarity 76, member A [Source:MGI Symbol;Acc:MGI:2385211]
ENSMUSG00000005628	0.0239	0.371	-1.96	0.893	0.998	-1.03	0.0037	0.0229	-2.27	0.813	0.949	1.06	0.783	0.982	1.09	Tmod4	tropomodulin 4 [Source:MGI Symbol;Acc:MGI:1355285]
ENSMUSG00000021258	0.0587	0.468	-1.46	0.603	0.995	-1.09	3.47e-05	0.00101	-2.27	0.629	0.883	-1.08	0.276	0.926	-1.25	Ccnk	cyclin K [Source:MGI Symbol;Acc:MGI:1276106]
ENSMUSG00000022092	0.0692	0.491	-1.42	0.876	0.998	-1.03	1.88e-05	0.000669	-2.27	0.171	0.567	-1.25	0.963	0.998	-1.01	Ppp3cc	protein phosphatase 3, catalytic subunit, gamma isoform [Source:MGI Symbol;Acc:MGI:107162]
ENSMUSG00000038239	0.0855	0.509	-1.45	0.865	0.998	1.03	0.000121	0.0023	-2.27	0.609	0.877	1.1	0.925	0.995	1.02	Hrc	histidine rich calcium binding protein [Source:MGI Symbol;Acc:MGI:96226]
ENSMUSG00000038370	0.00737	0.272	-2.4	0.248	0.959	-1.4	2.83e-05	0.000898	-3.6	0.000125	0.0173	-3.07	0.00149	0.286	-3.15	Pcp4l1	Purkinje cell protein 4-like 1 [Source:MGI Symbol;Acc:MGI:1913675]
ENSMUSG00000036057	0.0147	0.331	1.58	0.562	0.994	-1.1	0.0352	0.11	1.41	0.566	0.86	-1.09	0.181	0.918	-1.29	Ptpn23	protein tyrosine phosphatase, non-receptor type 23 [Source:MGI Symbol;Acc:MGI:2144837]
ENSMUSG00000007080	0.0147	0.331	2	0.328	0.987	1.29	0.206	0.368	1.33	0.416	0.781	1.19	0.452	0.948	1.24	Pole	polymerase (DNA directed), epsilon [Source:MGI Symbol;Acc:MGI:1196391]
ENSMUSG00000027368	0.0147	0.331	3.52	0.193	0.931	1.85	0.0793	0.191	1.98	0.0176	0.227	2.6	0.0974	0.917	2.65	Dusp2	dual specificity phosphatase 2 [Source:MGI Symbol;Acc:MGI:101911]
ENSMUSG00000030934	0.00289	0.204	-1.8	0.027	0.625	-1.45	2.15e-05	0.000731	-2.26	0.171	0.566	-1.25	0.644	0.96	-1.1	Oat	ornithine aminotransferase [Source:MGI Symbol;Acc:MGI:97394]
ENSMUSG00000000295	0.00671	0.266	-2.53	0.071	0.768	1.73	0.00333	0.0213	-2.26	0.197	0.598	1.37	0.0733	0.917	1.9	Hddc2	HD domain containing 2 [Source:MGI Symbol;Acc:MGI:1916942]
ENSMUSG00000055022	0.0148	0.331	4.59	0.667	0.998	-1.23	0.753	0.853	1.17	0.63	0.883	1.29	0.00479	0.459	-4.26	Cntn1	contactin 1 [Source:MGI Symbol;Acc:MGI:105980]
ENSMUSG00000018659	0.0128	0.326	-1.79	0.409	0.992	-1.17	0.000117	0.00224	-2.26	0.499	0.828	1.13	0.603	0.956	-1.13	Pnpo	pyridoxine 5'-phosphate oxidase [Source:MGI Symbol;Acc:MGI:2144151]
ENSMUSG00000046230	0.0456	0.439	-1.52	0.49	0.993	-1.13	7.33e-05	0.00161	-2.26	0.46	0.807	-1.14	0.447	0.948	1.19	Vps13a	vacuolar protein sorting 13A (yeast) [Source:MGI Symbol;Acc:MGI:2444304]
ENSMUSG00000019822	0.015	0.334	-1.49	0.0206	0.581	-1.42	0.288	0.461	-1.16	0.44	0.796	1.11	0.627	0.959	1.09	Smpd2	sphingomyelin phosphodiesterase 2, neutral [Source:MGI Symbol;Acc:MGI:1278330]
ENSMUSG00000083240	0.0151	0.334	-2.69	0.768	0.998	-1.16	0.233	0.398	-1.57	0.0163	0.22	-2.82	0.239	0.921	-1.86	Gm13453	predicted gene 13453 [Source:MGI Symbol;Acc:MGI:3651618]
ENSMUSG00000059970	0.0151	0.334	-1.79	0.00418	0.337	-1.89	0.166	0.317	-1.35	0.00597	0.138	1.75	0.664	0.963	-1.11	Hspa2	heat shock protein 2 [Source:MGI Symbol;Acc:MGI:96243]
ENSMUSG00000090150	0.0613	0.472	-1.33	0.0759	0.778	-1.27	2.88e-07	3.9e-05	-2.26	0.00562	0.134	-1.44	0.108	0.917	-1.29	Acad11	acyl-Coenzyme A dehydrogenase family, member 11 [Source:MGI Symbol;Acc:MGI:2143169]
ENSMUSG00000041180	0.675	0.9	-1.14	0.679	0.998	-1.12	0.00526	0.0293	-2.26	0.0878	0.436	-1.58	0.75	0.978	-1.11	Hectd2	HECT domain containing 2 [Source:MGI Symbol;Acc:MGI:2442663]
ENSMUSG00000030996	0.0139	0.329	-1.99	0.749	0.998	1.08	0.00226	0.0164	-2.25	0.847	0.958	-1.05	0.899	0.994	1.04	Art1	ADP-ribosyltransferase 1 [Source:MGI Symbol;Acc:MGI:107511]
ENSMUSG00000064264	0.0152	0.334	-3.2	0.777	0.998	-1.12	0.205	0.367	-1.64	0.211	0.615	1.63	0.849	0.988	1.11	Zfp428	zinc finger protein 428 [Source:MGI Symbol;Acc:MGI:1916463]
ENSMUSG00000034771	0.0152	0.334	-1.9	0.666	0.998	-1.11	0.0412	0.123	-1.56	0.557	0.855	1.13	0.41	0.945	-1.26	Tle2	transducin-like enhancer of split 2, homolog of Drosophila E(spl) [Source:MGI Symbol;Acc:MGI:104635]
ENSMUSG00000000399	0.0152	0.334	-1.72	0.245	0.957	1.25	0.0434	0.127	-1.51	0.882	0.968	-1.03	0.63	0.959	1.12	Ndufa9	NADH dehydrogenase (ubiquinone) 1 alpha subcomplex, 9 [Source:MGI Symbol;Acc:MGI:1913358]
ENSMUSG00000022463	0.0152	0.334	1.57	0.878	0.998	1.02	0.0149	0.0606	1.49	0.215	0.62	1.21	0.871	0.99	1.03	Srebf2	sterol regulatory element binding factor 2 [Source:MGI Symbol;Acc:MGI:107585]
ENSMUSG00000090799	0.0694	0.491	-1.65	0.847	0.998	1.05	0.000984	0.00962	-2.38	1.57e-05	0.00425	-3.07	0.00025	0.148	-3.09	Klhl33	kelch-like 33 [Source:MGI Symbol;Acc:MGI:3644593]
ENSMUSG00000032845	0.495	0.824	-1.16	0.743	0.998	1.06	0.115	0.247	-1.37	4.3e-07	0.000299	-2.96	6.45e-05	0.0572	-2.7	Alpk2	alpha-kinase 2 [Source:MGI Symbol;Acc:MGI:2449492]
ENSMUSG00000050812	0.0517	0.453	-1.45	0.303	0.984	-1.18	2.15e-05	0.000731	-2.25	0.0209	0.244	-1.46	0.584	0.955	-1.11	AI314180	expressed sequence AI314180 [Source:MGI Symbol;Acc:MGI:2140220]
ENSMUSG00000049422	0.102	0.526	-1.57	0.874	0.998	1.04	0.0021	0.0156	-2.25	0.16	0.556	-1.39	0.398	0.944	1.28	Chchd10	coiled-coil-helix-coiled-coil-helix domain containing 10 [Source:MGI Symbol;Acc:MGI:2143558]
ENSMUSG00000050447	0.519	0.835	-1.26	0.618	0.996	1.17	0.00916	0.0432	-2.25	0.351	0.738	1.26	0.907	0.994	1.04	Lypd6	LY6/PLAUR domain containing 6 [Source:MGI Symbol;Acc:MGI:2443848]
ENSMUSG00000028328	0.0139	0.329	-1.82	0.355	0.991	-1.21	0.000573	0.00672	-2.24	0.189	0.589	-1.3	0.801	0.985	1.06	Tmod1	tropomodulin 1 [Source:MGI Symbol;Acc:MGI:98775]
ENSMUSG00000025216	0.0189	0.344	-1.57	0.0228	0.602	-1.47	1.45e-05	0.00056	-2.24	0.00246	0.0908	-1.64	0.151	0.918	-1.34	Lbx1	ladybird homeobox homolog 1 (Drosophila) [Source:MGI Symbol;Acc:MGI:104867]
ENSMUSG00000021619	0.0156	0.337	-1.58	0.91	0.998	1.02	0.075	0.184	-1.36	0.655	0.892	-1.07	0.383	0.942	1.19	Atg10	autophagy related 10 [Source:MGI Symbol;Acc:MGI:1914045]
ENSMUSG00000020990	0.0156	0.337	3.65	0.259	0.963	1.58	0.0712	0.178	2.02	0.032	0.289	-2.78	0.0463	0.91	-3.51	Cdkl1	cyclin-dependent kinase-like 1 (CDC2-related kinase) [Source:MGI Symbol;Acc:MGI:1918341]
ENSMUSG00000022696	0.0156	0.337	4.99	0.477	0.992	-1.58	0.013	0.0552	3.94	0.0788	0.416	2.7	0.567	0.955	-1.51	Sidt1	SID1 transmembrane family, member 1 [Source:MGI Symbol;Acc:MGI:2443155]
ENSMUSG00000027068	0.0156	0.337	10.9	0.496	0.993	1.79	0.101	0.225	3.88	0.0392	0.314	5.11	0.312	0.935	3	Dhrs9	dehydrogenase/reductase (SDR family) member 9 [Source:MGI Symbol;Acc:MGI:2442798]
ENSMUSG00000004952	0.0232	0.368	-1.59	0.871	0.998	-1.03	5.01e-05	0.00125	-2.24	0.0462	0.335	1.4	0.59	0.955	1.12	Rasa4	RAS p21 protein activator 4 [Source:MGI Symbol;Acc:MGI:1858600]
ENSMUSG00000104913	0.281	0.702	-1.33	0.534	0.994	1.15	0.000668	0.00743	-2.24	0.771	0.932	1.06	0.939	0.996	-1.02	Gm6560	predicted gene 6560 [Source:MGI Symbol;Acc:MGI:3646204]
ENSMUSG00000050014	0.0157	0.337	-2.21	0.865	0.998	-1.06	0.696	0.814	-1.11	0.982	0.996	-1.01	0.599	0.956	-1.24	Apol10b	apolipoprotein L 10B [Source:MGI Symbol;Acc:MGI:3043522]
ENSMUSG00000075569	0.0157	0.337	2.34	0.0481	0.711	1.7	0.127	0.263	1.54	0.0044	0.117	2.35	0.478	0.95	1.37	Rsph10b	radial spoke head 10 homolog B (Chlamydomonas) [Source:MGI Symbol;Acc:MGI:1922386]
ENSMUSG00000063694	0.0158	0.337	-2.06	0.63	0.997	1.13	0.0177	0.0685	-1.9	0.454	0.803	-1.2	0.538	0.955	1.22	Cycs	cytochrome c, somatic [Source:MGI Symbol;Acc:MGI:88578]
ENSMUSG00000030869	0.0158	0.337	-1.86	0.845	0.998	-1.04	0.0356	0.11	-1.64	0.705	0.91	-1.08	0.232	0.918	1.38	Ndufab1	NADH dehydrogenase (ubiquinone) 1, alpha/beta subcomplex, 1 [Source:MGI Symbol;Acc:MGI:1917566]
ENSMUSG00000095930	0.755	0.932	-1.09	0.656	0.998	-1.13	0.00411	0.0246	-2.24	0.00959	0.173	1.82	0.237	0.92	1.44	Nim1k	NIM1 serine/threonine protein kinase [Source:MGI Symbol;Acc:MGI:2442399]
ENSMUSG00000032180	0.00546	0.247	-1.5	0.325	0.987	-1.13	4.44e-08	1.05e-05	-2.23	0.876	0.965	-1.02	0.492	0.951	1.11	Tmed1	transmembrane emp24 domain containing 1 [Source:MGI Symbol;Acc:MGI:106201]
ENSMUSG00000027510	0.0109	0.309	-1.71	0.234	0.953	-1.24	7.72e-05	0.00167	-2.23	0.713	0.911	1.07	0.357	0.94	1.22	Rbm38	RNA binding motif protein 38 [Source:MGI Symbol;Acc:MGI:1889294]
ENSMUSG00000053825	0.0159	0.337	-3.52	0.388	0.991	1.51	0.291	0.463	1.71	0.213	0.616	-1.78	0.338	0.938	-1.6	Ppfia2	protein tyrosine phosphatase, receptor type, f polypeptide (PTPRF), interacting protein (liprin), alpha 2 [Source:MGI Symbol;Acc:MGI:2443834]
ENSMUSG00000037204	0.131	0.564	-1.65	0.511	0.994	-1.22	0.00651	0.0341	-2.23	0.722	0.915	1.1	0.517	0.952	1.27	Atg101	autophagy related 101 [Source:MGI Symbol;Acc:MGI:1915368]
ENSMUSG00000025932	0.192	0.628	-1.27	0.684	0.998	1.07	4.62e-06	0.00024	-2.23	0.0696	0.396	-1.31	0.354	0.94	-1.19	Eya1	eyes absent 1 homolog (Drosophila) [Source:MGI Symbol;Acc:MGI:109344]
ENSMUSG00000024922	0.318	0.724	-1.25	0.997	1	1	0.000168	0.00289	-2.23	0.193	0.594	-1.27	0.814	0.987	1.06	Ovol1	OVO homolog-like 1 (Drosophila) [Source:MGI Symbol;Acc:MGI:1330290]
ENSMUSG00000096146	0.429	0.789	-1.16	0.457	0.992	-1.13	1.05e-05	0.000441	-2.23	0.125	0.502	-1.26	0.666	0.963	-1.09	Kcnj11	potassium inwardly rectifying channel, subfamily J, member 11 [Source:MGI Symbol;Acc:MGI:107501]
ENSMUSG00000018727	0.016	0.338	3.52	0.0897	0.813	2.07	0.929	0.961	1.03	0.429	0.788	1.4	0.449	0.948	-1.49	Cpsf4l	cleavage and polyadenylation specific factor 4-like [Source:MGI Symbol;Acc:MGI:1277182]
ENSMUSG00000027456	0.0161	0.338	-3.01	0.289	0.977	-1.56	0.344	0.52	1.48	0.165	0.561	1.68	0.537	0.955	1.39	Sdcbp2	syndecan binding protein (syntenin) 2 [Source:MGI Symbol;Acc:MGI:2385156]
ENSMUSG00000036006	1.84e-05	0.0226	-2.24	3.88e-09	4.1e-05	-3.53	1.01e-05	0.000426	-2.09	9.71e-09	1.41e-05	-2.89	0.000771	0.202	-1.89	Fam65b	family with sequence similarity 65, member B [Source:MGI Symbol;Acc:MGI:2444879]
ENSMUSG00000060487	0.0161	0.338	-2.37	0.358	0.991	1.37	0.517	0.676	-1.27	0.282	0.68	-1.48	0.378	0.941	1.58	Samd5	sterile alpha motif domain containing 5 [Source:MGI Symbol;Acc:MGI:2444815]
ENSMUSG00000101335	0.511	0.831	-1.17	0.644	0.997	-1.13	0.00139	0.0121	-2.23	0.283	0.682	-1.28	0.438	0.946	-1.23	Gm28229	predicted gene 28229 [Source:MGI Symbol;Acc:MGI:5578935]
ENSMUSG00000032584	0.0161	0.338	2.22	0.284	0.974	-1.34	0.0345	0.108	1.78	0.106	0.467	1.55	0.647	0.961	1.17	Mst1r	macrophage stimulating 1 receptor (c-met-related tyrosine kinase) [Source:MGI Symbol;Acc:MGI:99614]
ENSMUSG00000051627	0.0157	0.337	-2.94	0.259	0.963	1.46	0.00743	0.0375	-2.22	0.627	0.883	-1.17	0.356	0.94	1.46	Hist1h1e	histone cluster 1, H1e [Source:MGI Symbol;Acc:MGI:1931527]
ENSMUSG00000046798	0.0162	0.338	-1.5	0.0881	0.81	-1.29	0.0516	0.143	-1.35	0.352	0.74	-1.14	0.333	0.938	-1.19	Cldn12	claudin 12 [Source:MGI Symbol;Acc:MGI:1929288]
ENSMUSG00000019194	0.0161	0.338	-1.74	0.715	0.998	-1.07	0.000356	0.00487	-2.22	0.907	0.975	1.02	0.671	0.964	1.11	Scn1b	sodium channel, voltage-gated, type I, beta [Source:MGI Symbol;Acc:MGI:98247]
ENSMUSG00000005474	0.0163	0.338	-2.46	0.768	0.998	1.11	0.464	0.631	-1.28	0.728	0.917	1.13	0.584	0.955	-1.28	Myl10	myosin, light chain 10, regulatory [Source:MGI Symbol;Acc:MGI:1891705]
ENSMUSG00000001175	0.0497	0.449	-1.47	0.0356	0.662	-1.44	4.76e-05	0.00122	-2.22	0.0209	0.244	-1.48	0.173	0.918	-1.32	Calm1	calmodulin 1 [Source:MGI Symbol;Acc:MGI:88251]
ENSMUSG00000026730	0.0671	0.487	-1.46	0.839	0.998	1.04	4.32e-05	0.00115	-2.22	0.818	0.95	-1.04	0.6	0.956	1.12	Pter	phosphotriesterase related [Source:MGI Symbol;Acc:MGI:107372]
ENSMUSG00000042293	0.0164	0.338	-4.89	0.193	0.931	2.41	0.294	0.467	1.92	0.518	0.837	-1.4	0.657	0.963	1.41	Gm5617	predicted gene 5617 [Source:MGI Symbol;Acc:MGI:3643566]
ENSMUSG00000011263	0.0164	0.338	-3.34	0.466	0.992	-1.31	0.6	0.743	-1.26	0.7	0.908	-1.14	0.625	0.959	1.32	Exoc3l2	exocyst complex component 3-like 2 [Source:MGI Symbol;Acc:MGI:1921713]
ENSMUSG00000041058	0.112	0.542	-1.36	0.72	0.998	1.06	3.67e-05	0.00104	-2.22	0.00822	0.16	-1.55	0.298	0.934	-1.23	Wwp1	WW domain containing E3 ubiquitin protein ligase 1 [Source:MGI Symbol;Acc:MGI:1861728]
ENSMUSG00000028132	0.282	0.702	-1.28	0.874	0.998	-1.03	0.000345	0.00478	-2.22	0.107	0.469	-1.37	0.197	0.918	1.36	Tmem56	transmembrane protein 56 [Source:MGI Symbol;Acc:MGI:1923195]
ENSMUSG00000030515	0.00719	0.27	-1.46	0.713	0.998	1.05	7.77e-08	1.44e-05	-2.21	0.814	0.95	-1.03	0.853	0.988	1.03	Tarsl2	threonyl-tRNA synthetase-like 2 [Source:MGI Symbol;Acc:MGI:2444486]
ENSMUSG00000024782	0.0164	0.338	-1.36	0.45	0.992	-1.09	0.0264	0.0902	-1.3	0.0121	0.19	-1.31	0.677	0.965	-1.06	Ak3	adenylate kinase 3 [Source:MGI Symbol;Acc:MGI:1860835]
ENSMUSG00000019528	0.00753	0.273	-1.81	0.108	0.841	-1.36	0.000216	0.00349	-2.21	0.0521	0.35	-1.43	0.775	0.98	-1.07	Gyg	glycogenin [Source:MGI Symbol;Acc:MGI:1351614]
ENSMUSG00000033735	0.0322	0.403	-1.63	0.093	0.813	-1.4	0.000248	0.00378	-2.21	0.265	0.667	-1.23	0.703	0.97	1.1	Spr	sepiapterin reductase [Source:MGI Symbol;Acc:MGI:103078]
ENSMUSG00000037887	0.128	0.56	-1.33	0.181	0.927	-1.24	5.63e-06	0.000275	-2.21	0.022	0.251	-1.42	0.283	0.928	-1.23	Dusp8	dual specificity phosphatase 8 [Source:MGI Symbol;Acc:MGI:106626]
ENSMUSG00000067547	0.0166	0.339	-3.74	0.896	0.998	-1.07	0.614	0.754	-1.29	0.384	0.761	-1.45	0.905	0.994	-1.08	Gm7666	predicted pseudogene 7666 [Source:MGI Symbol;Acc:MGI:3648907]
ENSMUSG00000081194	0.157	0.593	-1.44	0.25	0.961	-1.29	0.00105	0.01	-2.21	0.0571	0.364	-1.53	0.385	0.942	-1.27	Gm8424	predicted gene 8424 [Source:MGI Symbol;Acc:MGI:3646584]
ENSMUSG00000078813	0.0167	0.339	-2.31	0.662	0.998	1.16	0.36	0.536	-1.3	0.808	0.949	1.07	0.736	0.977	-1.15	Leng1	leukocyte receptor cluster (LRC) member 1 [Source:MGI Symbol;Acc:MGI:1917007]
ENSMUSG00000040875	0.734	0.924	-1.12	0.00414	0.335	-2.27	0.00723	0.0367	-2.21	0.197	0.598	1.33	0.117	0.917	-1.63	Osbpl10	oxysterol binding protein-like 10 [Source:MGI Symbol;Acc:MGI:1921736]
ENSMUSG00000029388	0.0167	0.339	-1.53	0.565	0.994	-1.09	0.0973	0.22	-1.3	0.844	0.957	1.03	0.606	0.956	1.1	Eif2b1	eukaryotic translation initiation factor 2B, subunit 1 (alpha) [Source:MGI Symbol;Acc:MGI:2384802]
ENSMUSG00000044022	0.0167	0.339	3.05	0.718	0.998	1.12	0.563	0.713	-1.21	0.164	0.559	-1.6	0.278	0.926	-1.54	Pcdhb21	protocadherin beta 21 [Source:MGI Symbol;Acc:MGI:2136759]
ENSMUSG00000051736	0.981	0.998	-1.01	0.154	0.9	1.52	0.00502	0.0284	-2.21	0.148	0.538	1.5	0.909	0.994	1.04	Fam229b	family with sequence similarity 229, member B [Source:MGI Symbol;Acc:MGI:1913587]
ENSMUSG00000025170	0.00709	0.269	-1.79	0.691	0.998	1.08	0.000206	0.00338	-2.2	0.028	0.273	1.5	0.561	0.955	1.15	Rab40b	Rab40B, member RAS oncogene family [Source:MGI Symbol;Acc:MGI:2183451]
ENSMUSG00000083796	0.0168	0.339	3.59	0.901	0.998	1.05	0.962	0.979	-1.02	0.372	0.755	-1.46	0.00248	0.366	-4.68	Gm13369	predicted gene 13369 [Source:MGI Symbol;Acc:MGI:3651010]
ENSMUSG00000039081	0.0169	0.339	-1.87	0.389	0.991	1.25	0.197	0.357	-1.39	0.74	0.922	1.09	0.161	0.918	1.67	Zfp503	zinc finger protein 503 [Source:MGI Symbol;Acc:MGI:1353644]
ENSMUSG00000066839	0.0151	0.334	-1.52	0.168	0.921	-1.22	3.06e-06	0.00018	-2.2	0.819	0.951	-1.03	0.973	0.999	1.01	Ecsit	ECSIT homolog (Drosophila) [Source:MGI Symbol;Acc:MGI:1349469]
ENSMUSG00000029862	0.207	0.643	-1.29	0.957	0.998	1.01	0.000103	0.00204	-2.2	0.755	0.928	-1.06	0.297	0.933	-1.25	Clcn1	chloride channel, voltage-sensitive 1 [Source:MGI Symbol;Acc:MGI:88417]
ENSMUSG00000054640	0.308	0.719	-1.27	0.0236	0.604	-1.65	0.000404	0.0053	-2.2	0.00398	0.111	-1.84	0.049	0.917	-1.68	Slc8a1	solute carrier family 8 (sodium/calcium exchanger), member 1 [Source:MGI Symbol;Acc:MGI:107956]
ENSMUSG00000055116	0.624	0.879	1.17	0.676	0.998	-1.12	0.00222	0.0161	-2.2	0.288	0.687	-1.3	0.945	0.996	-1.02	Arntl	aryl hydrocarbon receptor nuclear translocator-like [Source:MGI Symbol;Acc:MGI:1096381]
ENSMUSG00000025395	0.0169	0.339	3.06	0.455	0.992	1.37	0.032	0.102	2.2	0.0548	0.357	2.06	0.56	0.955	1.32	Prim1	DNA primase, p49 subunit [Source:MGI Symbol;Acc:MGI:97757]
ENSMUSG00000025813	0.00297	0.208	-1.81	0.533	0.994	-1.11	5.15e-05	0.00127	-2.19	0.22	0.626	-1.22	0.982	0.999	1	Homer2	homer homolog 2 (Drosophila) [Source:MGI Symbol;Acc:MGI:1347354]
ENSMUSG00000018740	0.017	0.339	-1.78	0.228	0.951	1.32	0.209	0.371	-1.3	0.0207	0.243	-1.64	0.211	0.918	-1.43	Slc25a35	solute carrier family 25, member 35 [Source:MGI Symbol;Acc:MGI:1919248]
ENSMUSG00000075595	0.175	0.611	-1.25	0.381	0.991	-1.13	3.64e-06	0.000199	-2.19	0.00967	0.174	-1.45	0.0809	0.917	-1.35	Zfp652	zinc finger protein 652 [Source:MGI Symbol;Acc:MGI:2442221]
ENSMUSG00000063229	0.248	0.675	-1.3	0.188	0.928	-1.3	0.000462	0.00579	-2.19	0.857	0.96	-1.04	0.859	0.99	1.04	Ldha	lactate dehydrogenase A [Source:MGI Symbol;Acc:MGI:96759]
ENSMUSG00000043795	0.0187	0.342	-1.54	0.1	0.822	-1.3	2.09e-05	0.000716	-2.18	0.349	0.737	-1.15	0.135	0.917	-1.33	Prr33	proline rich 33 [Source:MGI Symbol;Acc:MGI:3642289]
ENSMUSG00000032577	0.0371	0.414	-1.42	0.186	0.928	-1.21	3.13e-06	0.000181	-2.18	0.884	0.968	-1.02	0.371	0.94	1.17	Mapkapk3	mitogen-activated protein kinase-activated protein kinase 3 [Source:MGI Symbol;Acc:MGI:2143163]
ENSMUSG00000018415	0.0465	0.441	-1.38	0.145	0.891	-1.23	2.82e-06	0.000171	-2.18	0.0141	0.205	-1.41	0.256	0.923	-1.21	Gid4	GID complex subunit 4, VID24 homolog (S. cerevisiae) [Source:MGI Symbol;Acc:MGI:1914021]
ENSMUSG00000002500	0.0544	0.457	-1.72	0.854	0.998	1.05	0.00356	0.0223	-2.18	0.61	0.877	-1.13	0.829	0.987	1.06	Rpl3l	ribosomal protein L3-like [Source:MGI Symbol;Acc:MGI:1913461]
ENSMUSG00000024695	0.0605	0.47	-1.33	0.407	0.992	-1.12	1.01e-06	9.01e-05	-2.18	0.0416	0.321	-1.3	0.333	0.938	-1.17	Zfp91	zinc finger protein 91 [Source:MGI Symbol;Acc:MGI:104854]
ENSMUSG00000038170	0.0723	0.494	-1.42	0.0461	0.711	-1.41	7.4e-05	0.00162	-2.18	0.0834	0.426	-1.34	0.0801	0.917	-1.44	Pde4dip	phosphodiesterase 4D interacting protein (myomegalin) [Source:MGI Symbol;Acc:MGI:1891434]
ENSMUSG00000063296	0.127	0.558	-1.48	0.311	0.985	-1.26	0.00155	0.0129	-2.18	0.902	0.973	-1.03	0.488	0.95	-1.21	Tmem117	transmembrane protein 117 [Source:MGI Symbol;Acc:MGI:2444580]
ENSMUSG00000099398	0.0172	0.339	4.48	0.405	0.992	1.55	0.0143	0.0593	4.35	0.0885	0.438	2.4	0.0928	0.917	3.99	Ms4a14	membrane-spanning 4-domains, subfamily A, member 14 [Source:MGI Symbol;Acc:MGI:2686122]
ENSMUSG00000032125	0.0173	0.339	-1.55	0.563	0.994	-1.1	0.146	0.291	-1.27	0.449	0.802	-1.13	0.288	0.928	-1.23	Robo4	roundabout homolog 4 (Drosophila) [Source:MGI Symbol;Acc:MGI:1921394]
ENSMUSG00000021182	0.322	0.725	-1.21	0.306	0.984	-1.19	4.82e-05	0.00123	-2.18	0.572	0.862	-1.1	0.101	0.917	-1.4	Ccdc88c	coiled-coil domain containing 88C [Source:MGI Symbol;Acc:MGI:1915589]
ENSMUSG00000050368	0.391	0.766	-1.34	0.355	0.991	-1.33	0.00959	0.0447	-2.18	0.0012	0.063	-2.58	0.00267	0.372	-2.57	Hoxd10	homeobox D10 [Source:MGI Symbol;Acc:MGI:96202]
ENSMUSG00000020706	0.0173	0.339	1.39	0.304	0.984	1.13	0.0938	0.214	1.23	0.0409	0.319	1.26	0.987	0.999	-1	Ftsj3	FtsJ homolog 3 (E. coli) [Source:MGI Symbol;Acc:MGI:1860295]
ENSMUSG00000060923	0.0181	0.339	-2.15	0.708	0.998	1.11	0.00932	0.0438	-2.17	0.416	0.781	-1.24	0.823	0.987	1.08	Acyp2	acylphosphatase 2, muscle type [Source:MGI Symbol;Acc:MGI:1922822]
ENSMUSG00000040183	0.0303	0.393	-1.8	0.00234	0.254	-2.17	0.00208	0.0155	-2.17	0.442	0.797	1.2	0.742	0.977	-1.1	Ankrd6	ankyrin repeat domain 6 [Source:MGI Symbol;Acc:MGI:2154278]
ENSMUSG00000054099	0.0174	0.339	-1.51	0.675	0.998	-1.07	0.683	0.805	-1.07	0.095	0.451	-1.27	0.107	0.917	-1.37	Slc25a40	solute carrier family 25, member 40 [Source:MGI Symbol;Acc:MGI:2442486]
ENSMUSG00000066037	0.0174	0.339	1.36	0.0181	0.547	1.31	0.208	0.37	1.15	0.531	0.842	1.07	0.238	0.921	1.18	Hnrnpr	heterogeneous nuclear ribonucleoprotein R [Source:MGI Symbol;Acc:MGI:1891692]
ENSMUSG00000070462	0.0174	0.339	2.03	0.24	0.954	1.39	0.0209	0.0771	1.79	0.171	0.567	1.39	0.158	0.918	1.75	Mesdc1	mesoderm development candidate 1 [Source:MGI Symbol;Acc:MGI:1891420]
ENSMUSG00000037474	0.0174	0.339	4.74	0.455	0.992	-1.61	0.0334	0.106	3.78	0.0197	0.239	4.22	0.214	0.918	2.61	Dtl	denticleless homolog (Drosophila) [Source:MGI Symbol;Acc:MGI:1924093]
ENSMUSG00000015083	0.168	0.606	-1.44	0.6	0.995	1.13	0.000811	0.0084	-2.17	0.862	0.961	1.04	0.681	0.966	1.14	C8g	complement component 8, gamma polypeptide [Source:MGI Symbol;Acc:MGI:88237]
ENSMUSG00000031626	0.00433	0.23	-2.05	8.67e-05	0.0692	-2.48	6.89e-07	6.86e-05	-3.51	4.21e-06	0.00168	-2.87	0.000428	0.18	-2.58	Sorbs2	sorbin and SH3 domain containing 2 [Source:MGI Symbol;Acc:MGI:1924574]
ENSMUSG00000007122	0.279	0.701	-1.36	0.981	0.999	-1.01	0.00404	0.0243	-2.17	0.211	0.615	1.35	0.579	0.955	-1.18	Casq1	calsequestrin 1 [Source:MGI Symbol;Acc:MGI:1309468]
ENSMUSG00000042515	0.453	0.802	-1.26	0.492	0.993	1.24	0.00843	0.0409	-2.17	0.326	0.716	1.31	0.715	0.971	1.14	Mum1l1	melanoma associated antigen (mutated) 1-like 1 [Source:MGI Symbol;Acc:MGI:2445062]
ENSMUSG00000001829	0.00139	0.183	-1.62	0.0945	0.814	-1.24	3.63e-07	4.49e-05	-2.16	0.929	0.981	-1.01	0.971	0.998	-1.01	Clpb	ClpB caseinolytic peptidase B [Source:MGI Symbol;Acc:MGI:1100517]
ENSMUSG00000038506	0.0116	0.314	-1.51	0.186	0.928	-1.2	2.66e-06	0.000164	-2.16	0.0276	0.273	-1.35	0.329	0.938	-1.18	Dcun1d2	DCN1, defective in cullin neddylation 1, domain containing 2 (S. cerevisiae) [Source:MGI Symbol;Acc:MGI:2142792]
ENSMUSG00000041351	0.0123	0.32	-1.68	0.125	0.866	1.33	3.52e-05	0.00102	-2.16	0.926	0.98	-1.02	0.0077	0.556	-1.78	Rap1gap	Rap1 GTPase-activating protein [Source:MGI Symbol;Acc:MGI:109338]
ENSMUSG00000104324	0.0176	0.339	-3.61	0.161	0.907	-1.88	0.637	0.77	-1.26	0.705	0.91	1.16	0.542	0.955	-1.37	Gm37320	predicted gene, 37320 [Source:MGI Symbol;Acc:MGI:5610548]
ENSMUSG00000028973	0.0506	0.451	-1.5	0.528	0.994	-1.12	9.89e-05	0.00198	-2.16	0.309	0.703	-1.19	0.199	0.918	-1.32	Abcb8	ATP-binding cassette, sub-family B (MDR/TAP), member 8 [Source:MGI Symbol;Acc:MGI:1351667]
ENSMUSG00000025531	0.0511	0.453	-1.47	0.202	0.936	-1.24	8.34e-05	0.00176	-2.16	0.0289	0.277	-1.45	0.469	0.948	1.17	Chm	choroidermia (RAB escort protein 1) [Source:MGI Symbol;Acc:MGI:892979]
ENSMUSG00000031885	0.304	0.716	-1.19	0.00275	0.273	-1.58	0.032	0.103	-1.4	2.65e-09	5.28e-06	-2.8	4.36e-06	0.0058	-2.48	Cbfb	core binding factor beta [Source:MGI Symbol;Acc:MGI:99851]
ENSMUSG00000030499	0.124	0.555	-1.46	0.559	0.994	-1.13	0.00122	0.011	-2.16	0.549	0.851	-1.13	0.707	0.971	-1.1	Kctd15	potassium channel tetramerisation domain containing 15 [Source:MGI Symbol;Acc:MGI:2385276]
ENSMUSG00000026163	0.0176	0.339	4.98	0.427	0.992	1.48	0.0664	0.17	2.22	0.797	0.944	-1.13	0.981	0.999	-1.01	Sphkap	SPHK1 interactor, AKAP domain containing [Source:MGI Symbol;Acc:MGI:1924879]
ENSMUSG00000052031	0.0177	0.339	-1.6	0.942	0.998	1.01	0.18	0.336	-1.26	0.0608	0.375	-1.35	0.126	0.917	-1.35	Tagap1	T cell activation GTPase activating protein 1 [Source:MGI Symbol;Acc:MGI:1919786]
ENSMUSG00000025040	0.0177	0.339	-1.48	0.434	0.992	-1.12	0.0299	0.0977	-1.39	0.433	0.792	-1.11	0.661	0.963	-1.08	Fundc1	FUN14 domain containing 1 [Source:MGI Symbol;Acc:MGI:1919268]
ENSMUSG00000028017	0.032	0.402	-1.5	0.000414	0.125	-1.9	0.0472	0.135	-1.41	8.15e-08	6.99e-05	-2.76	0.000628	0.202	-2.06	Egf	epidermal growth factor [Source:MGI Symbol;Acc:MGI:95290]
ENSMUSG00000091586	0.101	0.526	-1.48	0.993	1	1	0.894	0.941	-1.03	0.000107	0.016	-2.69	0.118	0.917	-1.59	Cyp4f17	cytochrome P450, family 4, subfamily f, polypeptide 17 [Source:MGI Symbol;Acc:MGI:3646233]
ENSMUSG00000029158	0.0178	0.339	-1.53	0.158	0.906	-1.25	0.0141	0.0584	-1.5	0.00814	0.159	-1.5	0.861	0.99	1.03	Yipf7	Yip1 domain family, member 7 [Source:MGI Symbol;Acc:MGI:1922831]
ENSMUSG00000022095	0.186	0.624	-1.24	0.14	0.885	-1.23	2.45e-06	0.000156	-2.16	0.199	0.6	-1.19	0.0138	0.689	-1.52	Fam160b2	family with sequence similarity 160, member B2 [Source:MGI Symbol;Acc:MGI:3036290]
ENSMUSG00000006457	0.113	0.543	-1.44	0.276	0.968	-1.24	0.000707	0.00769	-2.15	0.173	0.569	-1.31	0.358	0.94	-1.25	Actn3	actinin alpha 3 [Source:MGI Symbol;Acc:MGI:99678]
ENSMUSG00000038515	0.0179	0.339	-1.81	0.0978	0.819	1.44	0.0564	0.152	-1.53	0.311	0.704	-1.22	0.371	0.94	1.29	Grtp1	GH regulated TBC protein 1 [Source:MGI Symbol;Acc:MGI:1914040]
ENSMUSG00000025035	0.239	0.672	-1.39	0.489	0.993	1.19	0.00341	0.0217	-2.15	0.652	0.892	-1.11	0.93	0.995	1.03	Arl3	ADP-ribosylation factor-like 3 [Source:MGI Symbol;Acc:MGI:1929699]
ENSMUSG00000040532	0.0179	0.339	-1.56	0.592	0.995	-1.09	0.0125	0.0538	-1.54	0.767	0.931	1.05	0.236	0.92	1.28	Abhd11	abhydrolase domain containing 11 [Source:MGI Symbol;Acc:MGI:1916008]
ENSMUSG00000026788	0.0179	0.339	1.41	0.6	0.995	1.06	0.213	0.376	1.17	0.953	0.989	-1.01	0.796	0.984	-1.04	Zbtb43	zinc finger and BTB domain containing 43 [Source:MGI Symbol;Acc:MGI:1919084]
ENSMUSG00000056228	0.324	0.725	-1.24	0.963	0.998	-1.01	9.79e-05	0.00196	-2.15	0.782	0.937	-1.05	0.156	0.918	1.47	Cars2	cysteinyl-tRNA synthetase 2 (mitochondrial)(putative) [Source:MGI Symbol;Acc:MGI:1919191]
ENSMUSG00000051166	0.344	0.739	-1.22	0.71	0.998	1.07	0.000237	0.0037	-2.15	0.0144	0.208	1.62	0.0431	0.91	1.76	Eml5	echinoderm microtubule associated protein like 5 [Source:MGI Symbol;Acc:MGI:2442513]
ENSMUSG00000096199	0.018	0.339	-1.61	0.497	0.993	-1.13	0.0189	0.0718	-1.51	0.293	0.692	-1.19	0.691	0.968	1.1	Ptrhd1	peptidyl-tRNA hydrolase domain containing 1 [Source:MGI Symbol;Acc:MGI:1916959]
ENSMUSG00000096954	0.355	0.747	-1.27	0.139	0.883	-1.36	0.00148	0.0125	-2.15	0.00861	0.165	-1.95	0.904	0.994	1.04	Gdap10	ganglioside-induced differentiation-associated-protein 10 [Source:MGI Symbol;Acc:MGI:1338008]
ENSMUSG00000078851	0.576	0.861	-1.17	0.783	0.998	-1.06	0.00208	0.0155	-2.15	0.807	0.948	1.06	0.46	0.948	1.27	Hist3h2a	histone cluster 3, H2a [Source:MGI Symbol;Acc:MGI:2448458]
ENSMUSG00000032402	0.797	0.944	-1.06	0.0397	0.679	-1.47	0.000242	0.00374	-2.15	0.66	0.893	-1.08	0.757	0.979	-1.07	Smad3	SMAD family member 3 [Source:MGI Symbol;Acc:MGI:1201674]
ENSMUSG00000070880	0.018	0.339	3.74	0.0363	0.666	-2.73	0.801	0.885	-1.14	0.708	0.91	1.21	0.411	0.945	-1.52	Gad1	glutamate decarboxylase 1 [Source:MGI Symbol;Acc:MGI:95632]
ENSMUSG00000037710	0.0378	0.415	-1.85	0.975	0.999	-1.01	0.00535	0.0296	-2.14	0.416	0.781	-1.22	0.453	0.948	1.26	Cisd1	CDGSH iron sulfur domain 1 [Source:MGI Symbol;Acc:MGI:1261855]
ENSMUSG00000040528	0.018	0.339	4.83	0.881	0.998	1.09	0.0173	0.0673	3.78	0.059	0.368	2.99	0.119	0.917	3.62	Milr1	mast cell immunoglobulin like receptor 1 [Source:MGI Symbol;Acc:MGI:2685731]
ENSMUSG00000028755	0.018	0.339	5.32	0.0153	0.523	4.24	0.0661	0.17	2.68	0.00317	0.102	6.59	0.0721	0.917	4.37	Cda	cytidine deaminase [Source:MGI Symbol;Acc:MGI:1919519]
ENSMUSG00000028906	0.091	0.519	-1.27	0.0289	0.627	-1.31	2.84e-07	3.88e-05	-2.14	0.0968	0.454	-1.22	0.0253	0.826	-1.4	Epb41	erythrocyte membrane protein band 4.1 [Source:MGI Symbol;Acc:MGI:95401]
ENSMUSG00000051169	0.0941	0.521	-1.43	0.224	0.949	-1.26	0.000153	0.00272	-2.14	0.116	0.486	-1.33	0.156	0.918	-1.39	Rpusd3	RNA pseudouridylate synthase domain containing 3 [Source:MGI Symbol;Acc:MGI:2141440]
ENSMUSG00000015711	0.506	0.829	-1.09	0.0273	0.626	-1.28	0.026	0.0892	-1.3	1.7e-12	9.03e-09	-2.67	1.83e-06	0.00365	-2.02	Prune	prune homolog (Drosophila) [Source:MGI Symbol;Acc:MGI:1925152]
ENSMUSG00000023965	0.000444	0.113	-1.62	0.4	0.992	1.1	5.02e-08	1.16e-05	-2.13	0.0781	0.416	-1.21	0.873	0.991	1.02	Fbxl17	F-box and leucine-rich repeat protein 17 [Source:MGI Symbol;Acc:MGI:1354704]
ENSMUSG00000013593	0.0035	0.221	-1.71	0.648	0.998	-1.07	2.98e-05	0.000929	-2.13	0.241	0.648	-1.19	0.756	0.979	-1.06	Ndufs2	NADH dehydrogenase (ubiquinone) Fe-S protein 2 [Source:MGI Symbol;Acc:MGI:2385112]
ENSMUSG00000030802	0.0112	0.313	-1.66	0.52	0.994	1.12	9.66e-05	0.00195	-2.13	0.595	0.871	-1.09	0.993	0.999	-1	Bckdk	branched chain ketoacid dehydrogenase kinase [Source:MGI Symbol;Acc:MGI:1276121]
ENSMUSG00000025314	0.0182	0.339	2.22	0.983	0.999	-1.01	0.0144	0.0594	2.14	0.141	0.528	1.53	0.444	0.948	1.34	Ptprj	protein tyrosine phosphatase, receptor type, J [Source:MGI Symbol;Acc:MGI:104574]
ENSMUSG00000099137	0.0182	0.339	2.27	0.453	0.992	1.23	0.28	0.452	1.33	0.553	0.854	1.16	0.323	0.937	-1.34	Gm10603	predicted gene 10603 [Source:MGI Symbol;Acc:MGI:3642592]
ENSMUSG00000038058	0.0183	0.34	-1.42	0.283	0.974	-1.15	0.382	0.558	-1.12	0.995	0.999	-1	0.687	0.967	-1.07	Nod1	nucleotide-binding oligomerization domain containing 1 [Source:MGI Symbol;Acc:MGI:1341839]
ENSMUSG00000074657	0.0183	0.34	2.35	0.128	0.869	-1.61	0.0453	0.13	1.89	0.706	0.91	1.12	0.735	0.977	-1.12	Kif5a	kinesin family member 5A [Source:MGI Symbol;Acc:MGI:109564]
ENSMUSG00000028229	0.043	0.429	-1.49	0.423	0.992	1.15	8.07e-05	0.00172	-2.13	0.00173	0.0751	-1.72	0.112	0.917	-1.39	Rmdn1	regulator of microtubule dynamics 1 [Source:MGI Symbol;Acc:MGI:1913552]
ENSMUSG00000034639	0.0607	0.47	-1.75	0.461	0.992	1.19	0.00269	0.0185	-2.13	0.782	0.937	-1.06	0.95	0.996	1.02	Setmar	SET domain without mariner transposase fusion [Source:MGI Symbol;Acc:MGI:1921979]
ENSMUSG00000032267	0.0184	0.341	1.64	0.172	0.923	1.28	0.0218	0.0792	1.55	0.78	0.936	1.05	0.42	0.946	1.19	Usp28	ubiquitin specific peptidase 28 [Source:MGI Symbol;Acc:MGI:2442293]
ENSMUSG00000035934	0.104	0.53	-1.35	0.241	0.954	-1.22	2.89e-05	0.000914	-2.13	0.673	0.898	-1.07	0.995	1	1	Pknox2	Pbx/knotted 1 homeobox 2 [Source:MGI Symbol;Acc:MGI:2445415]
ENSMUSG00000032177	0.148	0.586	-1.57	0.663	0.998	-1.13	0.0107	0.0486	-2.13	0.137	0.522	-1.48	0.354	0.94	-1.35	Pde4a	phosphodiesterase 4A, cAMP specific [Source:MGI Symbol;Acc:MGI:99558]
ENSMUSG00000042717	0.246	0.674	-1.38	0.943	0.998	-1.02	0.00458	0.0266	-2.13	0.0106	0.18	-1.85	0.684	0.967	-1.12	Ppp1r3a	protein phosphatase 1, regulatory (inhibitor) subunit 3A [Source:MGI Symbol;Acc:MGI:2153588]
ENSMUSG00000061436	0.418	0.783	-1.2	0.322	0.986	-1.22	0.000805	0.00837	-2.13	0.00767	0.156	-1.71	0.0805	0.917	-1.53	Hipk2	homeodomain interacting protein kinase 2 [Source:MGI Symbol;Acc:MGI:1314872]
ENSMUSG00000066235	0.0245	0.373	-1.75	0.595	0.995	-1.12	0.000345	0.00477	-2.12	0.578	0.864	-1.11	0.48	0.95	1.2	Pomgnt2	protein O-linked mannose beta 1,4-N-acetylglucosaminyltransferase 2 [Source:MGI Symbol;Acc:MGI:2143424]
ENSMUSG00000079508	0.0354	0.409	-1.85	0.751	0.998	1.09	0.00355	0.0222	-2.12	0.0432	0.326	-1.63	0.682	0.967	-1.14	Apoo	apolipoprotein O [Source:MGI Symbol;Acc:MGI:1915566]
ENSMUSG00000046572	0.0186	0.342	-1.48	0.895	0.998	-1.02	0.724	0.834	-1.05	0.454	0.803	-1.11	0.365	0.94	-1.18	Zfp518b	zinc finger protein 518B [Source:MGI Symbol;Acc:MGI:2140750]
ENSMUSG00000028868	0.0186	0.342	1.54	0.367	0.991	-1.15	0.073	0.181	1.34	0.274	0.674	-1.18	0.119	0.917	-1.34	Wasf2	WAS protein family, member 2 [Source:MGI Symbol;Acc:MGI:1098641]
ENSMUSG00000047215	0.0186	0.342	1.55	0.928	0.998	1.01	0.0862	0.202	1.34	0.615	0.879	1.08	0.523	0.953	1.13	Rpl9	ribosomal protein L9 [Source:MGI Symbol;Acc:MGI:1298373]
ENSMUSG00000100181	0.0187	0.342	-3.87	0.571	0.994	-1.34	0.164	0.315	-2.09	0.0813	0.423	-2.56	0.224	0.918	-2.17	Gm29096	predicted gene 29096 [Source:MGI Symbol;Acc:MGI:5579802]
ENSMUSG00000055493	0.183	0.621	-1.29	0.601	0.995	-1.09	7.71e-05	0.00167	-2.12	0.0291	0.278	-1.43	0.136	0.917	-1.35	Epm2a	epilepsy, progressive myoclonic epilepsy, type 2 gene alpha [Source:MGI Symbol;Acc:MGI:1341085]
ENSMUSG00000039478	0.246	0.674	-1.38	0.297	0.983	-1.28	0.00391	0.0238	-2.12	0.0314	0.288	-1.66	0.617	0.957	-1.16	Micu3	mitochondrial calcium uptake family, member 3 [Source:MGI Symbol;Acc:MGI:1925756]
ENSMUSG00000013701	0.00794	0.279	-1.81	0.987	0.999	-1	0.000188	0.00314	-2.11	0.34	0.728	-1.18	0.969	0.998	-1.01	Timm23	translocase of inner mitochondrial membrane 23 [Source:MGI Symbol;Acc:MGI:1858317]
ENSMUSG00000022016	0.0188	0.343	1.62	0.109	0.842	1.33	0.0244	0.0855	1.52	0.228	0.635	-1.23	0.447	0.948	1.18	Akap11	A kinase (PRKA) anchor protein 11 [Source:MGI Symbol;Acc:MGI:2684060]
ENSMUSG00000083626	0.0189	0.344	-3.14	0.557	0.994	-1.32	0.0954	0.217	-2.1	0.573	0.862	-1.26	0.0748	0.917	3.35	Gm4459	predicted gene 4459 [Source:MGI Symbol;Acc:MGI:3782643]
ENSMUSG00000038342	0.119	0.547	-1.28	0.138	0.879	-1.23	4.89e-06	0.000248	-2.11	0.0637	0.381	-1.29	0.00033	0.165	-1.89	Mlxip	MLX interacting protein [Source:MGI Symbol;Acc:MGI:2141183]
ENSMUSG00000053192	0.000397	0.112	-1.89	0.0155	0.523	-1.46	1.25e-05	0.000502	-2.1	0.546	0.848	-1.09	0.234	0.918	-1.24	Mllt11	myeloid/lymphoid or mixed-lineage leukemia (trithorax homolog, Drosophila); translocated to, 11 [Source:MGI Symbol;Acc:MGI:1929671]
ENSMUSG00000048351	0.00502	0.243	-1.51	0.0531	0.726	-1.27	3.51e-07	4.4e-05	-2.1	0.381	0.76	-1.11	0.303	0.934	-1.17	Coa7	cytochrome c oxidase assembly factor 7 [Source:MGI Symbol;Acc:MGI:1917143]
ENSMUSG00000036745	0.00773	0.274	-2.12	0.00261	0.269	-2.14	5.15e-07	5.75e-05	-4.3	0.000104	0.0159	-2.64	0.228	0.918	-1.41	Ttll7	tubulin tyrosine ligase-like family, member 7 [Source:MGI Symbol;Acc:MGI:1918142]
ENSMUSG00000089679	0.0192	0.348	2.65	0.887	0.998	-1.05	0.101	0.226	1.64	0.383	0.761	-1.31	0.81	0.987	1.12	Gm16299	predicted gene 16299 [Source:MGI Symbol;Acc:MGI:3826539]
ENSMUSG00000083907	0.0192	0.348	3.84	0.864	0.998	1.09	0.464	0.631	1.45	0.973	0.994	1.02	0.372	0.94	-1.68	Plk-ps1	polo-like kinase, pseudogene 1 [Source:MGI Symbol;Acc:MGI:103247]
ENSMUSG00000060275	0.0194	0.349	-4.06	0.468	0.992	1.46	0.487	0.65	1.37	0.613	0.878	-1.29	0.53	0.955	-1.46	Nrg2	neuregulin 2 [Source:MGI Symbol;Acc:MGI:1098246]
ENSMUSG00000042787	0.0194	0.35	-1.65	0.658	0.998	-1.1	0.609	0.749	1.11	0.464	0.808	1.16	0.107	0.917	1.57	Exog	endo/exonuclease (5'-3'), endonuclease G-like [Source:MGI Symbol;Acc:MGI:2143333]
ENSMUSG00000014551	0.0194	0.349	-1.55	0.178	0.926	-1.24	0.0302	0.0986	-1.43	0.788	0.939	1.04	0.586	0.955	-1.12	Mrps25	mitochondrial ribosomal protein S25 [Source:MGI Symbol;Acc:MGI:1928140]
ENSMUSG00000021044	0.0173	0.339	-1.47	0.144	0.891	-1.23	3.36e-06	0.000187	-2.1	0.281	0.679	1.16	0.95	0.996	-1.01	Adck1	aarF domain containing kinase 1 [Source:MGI Symbol;Acc:MGI:1919363]
ENSMUSG00000030137	0.0306	0.394	-1.67	0.733	0.998	-1.07	0.00105	0.01	-2.1	0.997	0.999	-1	0.506	0.952	1.18	Tuba8	tubulin, alpha 8 [Source:MGI Symbol;Acc:MGI:1858225]
ENSMUSG00000058997	0.0195	0.35	-1.37	0.646	0.998	1.05	0.0283	0.0943	-1.31	0.765	0.931	-1.03	0.878	0.992	-1.02	Vwa8	von Willebrand factor A domain containing 8 [Source:MGI Symbol;Acc:MGI:1919008]
ENSMUSG00000001027	0.155	0.592	-1.28	0.91	0.998	-1.02	2.68e-05	0.000859	-2.1	0.108	0.471	-1.27	0.122	0.917	-1.33	Scn4a	sodium channel, voltage-gated, type IV, alpha [Source:MGI Symbol;Acc:MGI:98250]
ENSMUSG00000025525	0.0196	0.35	-1.52	0.869	0.998	-1.03	0.0344	0.108	-1.4	0.687	0.903	-1.06	0.846	0.988	-1.04	Apool	apolipoprotein O-like [Source:MGI Symbol;Acc:MGI:1915367]
ENSMUSG00000025432	0.105	0.532	1.66	0.927	0.998	1.02	0.768	0.864	1.07	0.000379	0.0333	-2.62	0.468	0.948	-1.32	Avil	advillin [Source:MGI Symbol;Acc:MGI:1333798]
ENSMUSG00000024924	0.308	0.72	-1.26	0.795	0.998	-1.05	0.00103	0.00994	-2.1	0.0357	0.302	-1.52	0.652	0.962	-1.11	Vldlr	very low density lipoprotein receptor [Source:MGI Symbol;Acc:MGI:98935]
ENSMUSG00000028277	0.0196	0.35	1.45	0.66	0.998	1.06	0.31	0.484	1.15	0.493	0.826	1.09	0.519	0.952	-1.11	Ube2j1	ubiquitin-conjugating enzyme E2J 1 [Source:MGI Symbol;Acc:MGI:1926245]
ENSMUSG00000064030	0.0196	0.35	1.63	0.63	0.997	-1.09	0.29	0.463	-1.18	0.604	0.875	-1.09	0.797	0.984	1.06	Pym1	PYM homolog 1, exon junction complex associated factor [Source:MGI Symbol;Acc:MGI:1925678]
ENSMUSG00000047371	0.311	0.72	-1.19	0.886	0.998	1.02	5.03e-06	0.000254	-2.1	0.183	0.582	-1.2	0.277	0.926	-1.21	Zfp768	zinc finger protein 768 [Source:MGI Symbol;Acc:MGI:2384582]
ENSMUSG00000043342	0.599	0.87	-1.16	0.658	0.998	-1.11	0.00231	0.0166	-2.1	0.321	0.712	-1.23	0.346	0.939	-1.3	Hoxd9	homeobox D9 [Source:MGI Symbol;Acc:MGI:96210]
ENSMUSG00000023809	0.000556	0.127	-2.79	0.0055	0.373	-2.03	2.1e-06	0.000143	-3.99	0.000174	0.0208	-2.61	0.0251	0.824	-1.96	Rps6ka2	ribosomal protein S6 kinase, polypeptide 2 [Source:MGI Symbol;Acc:MGI:1342290]
ENSMUSG00000034105	0.0197	0.35	-1.51	0.63	0.997	-1.08	0.855	0.919	-1.03	0.309	0.703	1.16	0.638	0.96	1.1	Tldc1	TBC/LysM associated domain containing 1 [Source:MGI Symbol;Acc:MGI:1921597]
ENSMUSG00000024213	0.00599	0.258	-1.87	0.247	0.959	-1.25	0.000625	0.00714	-2.09	0.6	0.873	-1.1	0.69	0.968	-1.1	Nudt3	nudix (nucleotide diphosphate linked moiety X)-type motif 3 [Source:MGI Symbol;Acc:MGI:1928484]
ENSMUSG00000037111	0.813	0.95	-1.04	0.637	0.997	1.07	0.00995	0.0459	-1.5	6.01e-09	1.07e-05	-2.61	2.39e-05	0.0254	-2.21	Setd7	SET domain containing (lysine methyltransferase) 7 [Source:MGI Symbol;Acc:MGI:1920501]
ENSMUSG00000018648	0.0414	0.424	-1.76	0.0327	0.648	-1.67	0.00325	0.021	-2.09	0.727	0.917	1.07	0.522	0.952	-1.19	Dusp14	dual specificity phosphatase 14 [Source:MGI Symbol;Acc:MGI:1927168]
ENSMUSG00000060181	0.02	0.354	1.41	0.802	0.998	1.03	0.013	0.0553	1.38	0.787	0.939	1.03	0.154	0.918	1.28	Slc35e3	solute carrier family 35, member E3 [Source:MGI Symbol;Acc:MGI:2448489]
ENSMUSG00000000934	0.0584	0.467	-1.39	0.82	0.998	1.03	9.54e-06	0.000407	-2.09	0.927	0.981	-1.01	0.371	0.94	1.19	Top1mt	DNA topoisomerase 1, mitochondrial [Source:MGI Symbol;Acc:MGI:1920210]
ENSMUSG00000078495	0.0201	0.355	2.67	0.276	0.968	1.54	0.426	0.597	1.31	0.227	0.635	1.54	0.575	0.955	-1.26	Gm13157	predicted gene 13157 [Source:MGI Symbol;Acc:MGI:3651978]
ENSMUSG00000038949	0.154	0.59	-1.29	0.0166	0.526	-1.47	4.51e-05	0.00119	-2.09	0.396	0.771	-1.14	0.478	0.95	-1.14	Cnst	consortin, connexin sorting protein [Source:MGI Symbol;Acc:MGI:2445141]
ENSMUSG00000042404	0.244	0.674	-1.22	0.267	0.967	-1.18	2.14e-05	0.000731	-2.09	0.0776	0.415	-1.29	0.282	0.927	-1.21	Dennd4b	DENN/MADD domain containing 4B [Source:MGI Symbol;Acc:MGI:2446201]
ENSMUSG00000013160	0.0202	0.355	1.33	0.453	0.992	1.08	0.0114	0.0505	1.33	0.705	0.91	1.04	0.542	0.955	1.08	Atp6v0d1	ATPase, H+ transporting, lysosomal V0 subunit D1 [Source:MGI Symbol;Acc:MGI:1201778]
ENSMUSG00000020961	0.293	0.711	-1.27	0.689	0.998	-1.08	0.000757	0.00804	-2.09	0.000966	0.0567	-1.97	0.0554	0.917	-1.59	Ston2	stonin 2 [Source:MGI Symbol;Acc:MGI:1918272]
ENSMUSG00000028630	0.927	0.984	-1.02	0.648	0.998	-1.11	0.00175	0.014	-2.09	0.0621	0.378	-1.5	0.621	0.957	1.15	Dyrk2	dual-specificity tyrosine-(Y)-phosphorylation regulated kinase 2 [Source:MGI Symbol;Acc:MGI:1330301]
ENSMUSG00000021820	0.0074	0.272	-1.45	0.208	0.939	-1.16	2.92e-07	3.91e-05	-2.08	0.0565	0.364	-1.25	0.224	0.918	-1.19	Camk2g	calcium/calmodulin-dependent protein kinase II gamma [Source:MGI Symbol;Acc:MGI:88259]
ENSMUSG00000020826	0.0204	0.356	-1.97	0.719	0.998	1.11	0.126	0.262	-1.46	0.464	0.808	-1.23	0.303	0.934	-1.45	Nos2	nitric oxide synthase 2, inducible [Source:MGI Symbol;Acc:MGI:97361]
ENSMUSG00000079428	0.0204	0.356	-1.94	0.142	0.888	-1.6	0.357	0.534	1.28	0.0965	0.454	-1.5	0.792	0.983	1.09	Tceal7	transcription elongation factor A (SII)-like 7 [Source:MGI Symbol;Acc:MGI:1915746]
ENSMUSG00000029833	0.00869	0.287	-1.56	0.189	0.928	-1.21	9.73e-06	0.000414	-2.08	0.29	0.689	-1.16	0.748	0.978	-1.06	Trim24	tripartite motif-containing 24 [Source:MGI Symbol;Acc:MGI:109275]
ENSMUSG00000021764	0.00889	0.288	-2.02	0.732	0.998	-1.08	0.00319	0.0207	-2.08	0.293	0.692	-1.26	0.392	0.944	1.27	Ndufs4	NADH dehydrogenase (ubiquinone) Fe-S protein 4 [Source:MGI Symbol;Acc:MGI:1343135]
ENSMUSG00000021573	0.0205	0.356	-1.7	0.514	0.994	1.14	0.0812	0.194	-1.42	0.00766	0.156	-1.75	0.338	0.938	-1.27	Tppp	tubulin polymerization promoting protein [Source:MGI Symbol;Acc:MGI:1920198]
ENSMUSG00000013622	0.0205	0.356	-1.47	0.573	0.994	-1.09	0.342	0.518	-1.15	0.915	0.976	-1.01	0.541	0.955	1.12	Atraid	all-trans retinoic acid induced differentiation factor [Source:MGI Symbol;Acc:MGI:1918918]
ENSMUSG00000011382	0.0737	0.494	-1.33	0.799	0.998	1.04	3.87e-06	0.000207	-2.08	0.000959	0.0567	-1.58	0.224	0.918	-1.22	Dhdh	dihydrodiol dehydrogenase (dimeric) [Source:MGI Symbol;Acc:MGI:1919005]
ENSMUSG00000047787	0.474	0.813	1.3	0.714	0.998	1.11	2.06e-06	0.000141	-4.46	0.000349	0.032	-2.59	0.274	0.926	-1.51	Flrt1	fibronectin leucine rich transmembrane protein 1 [Source:MGI Symbol;Acc:MGI:3026647]
ENSMUSG00000026407	0.172	0.611	-1.33	0.351	0.99	-1.19	0.000455	0.00572	-2.08	0.861	0.961	-1.03	0.846	0.988	-1.04	Cacna1s	calcium channel, voltage-dependent, L type, alpha 1S subunit [Source:MGI Symbol;Acc:MGI:88294]
ENSMUSG00000008035	0.0207	0.356	-2.07	0.351	0.99	-1.29	0.152	0.299	-1.49	0.195	0.596	1.38	0.317	0.936	-1.38	Mid1ip1	Mid1 interacting protein 1 (gastrulation specific G12-like (zebrafish)) [Source:MGI Symbol;Acc:MGI:1915291]
ENSMUSG00000079036	0.0207	0.356	1.43	0.932	0.998	-1.01	0.0676	0.172	1.27	0.324	0.714	1.13	0.578	0.955	1.09	Alkbh1	alkB, alkylation repair homolog 1 (E. coli) [Source:MGI Symbol;Acc:MGI:2384034]
ENSMUSG00000034751	0.943	0.989	1.01	0.351	0.99	-1.19	0.000348	0.0048	-2.08	0.0277	0.273	-1.49	0.0566	0.917	-1.53	Mast4	microtubule associated serine/threonine kinase family member 4 [Source:MGI Symbol;Acc:MGI:1918885]
ENSMUSG00000044894	0.0208	0.356	-2.46	0.91	0.998	1.04	0.0265	0.0903	-2.2	0.341	0.73	-1.35	0.127	0.917	1.91	Uqcrq	ubiquinol-cytochrome c reductase, complex III subunit VII [Source:MGI Symbol;Acc:MGI:107807]
ENSMUSG00000026664	0.0059	0.258	-1.64	0.485	0.993	-1.11	3.34e-05	0.00099	-2.07	0.105	0.467	-1.27	0.539	0.955	-1.12	Phyh	phytanoyl-CoA hydroxylase [Source:MGI Symbol;Acc:MGI:891978]
ENSMUSG00000061360	0.0208	0.356	-1.36	0.181	0.927	1.17	0.0179	0.0688	-1.33	0.452	0.803	-1.08	0.734	0.977	1.05	Phf5a	PHD finger protein 5A [Source:MGI Symbol;Acc:MGI:2156864]
ENSMUSG00000039345	0.025	0.375	-1.73	0.992	1	1	0.00158	0.013	-2.07	0.438	0.796	-1.17	0.879	0.992	1.04	Mettl22	methyltransferase like 22 [Source:MGI Symbol;Acc:MGI:2384301]
ENSMUSG00000030647	0.0209	0.356	-2.1	0.641	0.997	-1.14	0.0139	0.058	-2.06	0.124	0.501	-1.51	0.0228	0.802	2.28	Ndufc2	NADH dehydrogenase (ubiquinone) 1, subcomplex unknown, 2 [Source:MGI Symbol;Acc:MGI:1344370]
ENSMUSG00000039652	0.0363	0.412	-1.43	0.261	0.963	-1.18	2.04e-05	0.000703	-2.07	0.0789	0.417	1.29	0.242	0.921	1.23	Cpeb3	cytoplasmic polyadenylation element binding protein 3 [Source:MGI Symbol;Acc:MGI:2443075]
ENSMUSG00000041161	0.0518	0.453	-1.34	0.0652	0.755	-1.28	1.01e-06	9.01e-05	-2.07	0.0395	0.314	-1.3	0.677	0.965	-1.07	Otud3	OTU domain containing 3 [Source:MGI Symbol;Acc:MGI:1920412]
ENSMUSG00000030554	0.119	0.547	-1.28	0.864	0.998	1.02	1.07e-05	0.000445	-2.07	0.128	0.507	-1.23	0.723	0.973	-1.06	Synm	synemin, intermediate filament protein [Source:MGI Symbol;Acc:MGI:2661187]
ENSMUSG00000047036	0.211	0.646	-1.26	0.676	0.998	1.07	0.000111	0.00216	-2.07	0.181	0.58	-1.24	0.305	0.934	1.25	Zfp445	zinc finger protein 445 [Source:MGI Symbol;Acc:MGI:2143340]
ENSMUSG00000019865	0.021	0.356	-3.56	0.582	0.994	1.28	0.468	0.634	-1.42	0.757	0.929	-1.16	0.021	0.782	-3.32	Nmbr	neuromedin B receptor [Source:MGI Symbol;Acc:MGI:1100525]
ENSMUSG00000032528	0.269	0.693	-1.39	0.145	0.891	-1.5	0.00558	0.0305	-2.07	0.1	0.461	-1.62	0.0372	0.9	-1.91	Vipr1	vasoactive intestinal peptide receptor 1 [Source:MGI Symbol;Acc:MGI:109272]
ENSMUSG00000026471	0.946	0.989	-1.01	0.175	0.923	-1.21	0.27	0.442	1.17	2.46e-08	3.02e-05	-2.56	0.00235	0.361	-1.72	Mr1	major histocompatibility complex, class I-related [Source:MGI Symbol;Acc:MGI:1195463]
ENSMUSG00000050199	0.00469	0.238	-1.62	0.487	0.993	-1.1	1.34e-05	0.000533	-2.06	0.00347	0.105	-1.53	0.418	0.946	-1.15	Lgr4	leucine-rich repeat-containing G protein-coupled receptor 4 [Source:MGI Symbol;Acc:MGI:1891468]
ENSMUSG00000004798	0.0131	0.329	-1.45	0.37	0.991	-1.12	1.92e-06	0.000135	-2.06	0.0312	0.287	-1.31	0.752	0.979	-1.05	Ulk2	unc-51 like kinase 2 [Source:MGI Symbol;Acc:MGI:1352758]
ENSMUSG00000021694	0.021	0.356	-1.48	0.117	0.86	1.29	0.758	0.858	-1.05	0.649	0.891	-1.07	0.191	0.918	-1.28	Ercc8	excision repaiross-complementing rodent repair deficiency, complementation group 8 [Source:MGI Symbol;Acc:MGI:1919241]
ENSMUSG00000014850	0.0326	0.403	-1.45	0.995	1	-1	1.38e-05	0.000542	-2.06	0.13	0.51	-1.24	0.613	0.957	1.1	Msh3	mutS homolog 3 (E. coli) [Source:MGI Symbol;Acc:MGI:109519]
ENSMUSG00000020359	0.021	0.356	-1.35	0.959	0.998	-1.01	0.161	0.312	-1.18	0.958	0.99	1.01	0.118	0.917	1.25	Phykpl	5-phosphohydroxy-L-lysine phospholyase [Source:MGI Symbol;Acc:MGI:1920197]
ENSMUSG00000015702	0.021	0.356	2.32	0.57	0.994	-1.19	0.0134	0.0564	2.24	0.0868	0.435	1.62	0.667	0.963	1.19	Anxa9	annexin A9 [Source:MGI Symbol;Acc:MGI:1923711]
ENSMUSG00000027832	0.0363	0.412	-1.74	0.249	0.961	-1.3	0.00266	0.0183	-2.06	0.307	0.702	1.24	0.0201	0.782	2.13	Ptx3	pentraxin related gene [Source:MGI Symbol;Acc:MGI:104641]
ENSMUSG00000024038	0.0211	0.356	-1.92	0.868	0.998	1.04	0.0185	0.0706	-1.83	0.597	0.872	-1.13	0.303	0.934	1.36	Ndufv3	NADH dehydrogenase (ubiquinone) flavoprotein 3 [Source:MGI Symbol;Acc:MGI:1890894]
ENSMUSG00000028420	0.0579	0.466	-1.54	0.0994	0.822	-1.39	0.000931	0.00926	-2.06	0.794	0.942	1.05	0.987	0.999	1	Tmem38b	transmembrane protein 38B [Source:MGI Symbol;Acc:MGI:1098718]
ENSMUSG00000040390	0.0756	0.497	-1.39	0.0221	0.597	-1.45	5.49e-05	0.00133	-2.06	0.399	0.772	-1.14	0.0975	0.917	-1.37	Map3k10	mitogen-activated protein kinase kinase kinase 10 [Source:MGI Symbol;Acc:MGI:1346879]
ENSMUSG00000028773	0.0214	0.36	-2.48	0.88	0.998	-1.05	0.113	0.245	-1.77	0.309	0.703	-1.39	0.545	0.955	1.28	Fabp3	fatty acid binding protein 3, muscle and heart [Source:MGI Symbol;Acc:MGI:95476]
ENSMUSG00000030730	0.0982	0.525	-1.35	0.452	0.992	-1.12	6.43e-05	0.00148	-2.06	0.371	0.754	-1.15	0.463	0.948	-1.15	Atp2a1	ATPase, Ca++ transporting, cardiac muscle, fast twitch 1 [Source:MGI Symbol;Acc:MGI:105058]
ENSMUSG00000024905	0.0214	0.359	2.46	0.0752	0.776	2.07	0.246	0.414	1.45	0.414	0.779	-1.31	0.954	0.997	-1.03	Mtl5	metallothionein-like 5, testis-specific (tesmin) [Source:MGI Symbol;Acc:MGI:1340029]
ENSMUSG00000038403	0.109	0.539	-1.44	0.856	0.998	-1.04	0.00126	0.0112	-2.06	0.31	0.703	-1.22	0.799	0.984	-1.06	Hfe2	hemochromatosis type 2 (juvenile) (human homolog) [Source:MGI Symbol;Acc:MGI:1916835]
ENSMUSG00000055538	0.0215	0.36	1.33	0.905	0.998	1.01	0.411	0.584	1.1	0.00135	0.0652	-1.41	0.00259	0.37	-1.49	Zcchc24	zinc finger, CCHC domain containing 24 [Source:MGI Symbol;Acc:MGI:1919168]
ENSMUSG00000020312	0.11	0.539	-1.51	0.00294	0.287	-2.06	0.000438	0.00559	-2.06	0.0869	0.435	1.37	0.244	0.923	-1.31	Shc2	SHC (Src homology 2 domain containing) transforming protein 2 [Source:MGI Symbol;Acc:MGI:106180]
ENSMUSG00000066324	0.131	0.565	-1.34	0.953	0.998	-1.01	0.000161	0.00282	-2.06	0.00927	0.17	-1.55	0.843	0.988	-1.04	Impad1	inositol monophosphatase domain containing 1 [Source:MGI Symbol;Acc:MGI:1915720]
ENSMUSG00000031543	0.145	0.583	-1.36	0.516	0.994	-1.13	0.000474	0.00588	-2.06	0.794	0.942	-1.05	0.785	0.982	-1.06	Ank1	ankyrin 1, erythroid [Source:MGI Symbol;Acc:MGI:88024]
ENSMUSG00000028407	0.0217	0.361	-5.34	0.464	0.992	1.56	0.158	0.307	-2.24	0.424	0.785	-1.48	0.241	0.921	3.14	Toporsos	topoisomerase I binding, arginine/serine-rich, opposite strand [Source:MGI Symbol;Acc:MGI:1913684]
ENSMUSG00000020658	0.458	0.804	-1.17	0.384	0.991	-1.18	0.000268	0.00398	-2.06	0.226	0.634	-1.24	0.00473	0.459	-1.94	Efr3b	EFR3 homolog B (S. cerevisiae) [Source:MGI Symbol;Acc:MGI:2444851]
ENSMUSG00000054659	0.586	0.864	-1.17	0.663	0.998	1.11	0.00787	0.0389	-2.06	0.888	0.969	1.03	0.523	0.953	1.22	Pm20d2	peptidase M20 domain containing 2 [Source:MGI Symbol;Acc:MGI:2685270]
ENSMUSG00000027488	0.884	0.972	-1.02	0.00363	0.321	-1.55	1.54e-05	0.000589	-2.06	0.49	0.824	1.1	0.848	0.988	-1.03	Snta1	syntrophin, acidic 1 [Source:MGI Symbol;Acc:MGI:101772]
ENSMUSG00000040025	0.0217	0.361	1.41	0.133	0.875	1.22	0.116	0.249	1.23	0.956	0.989	1.01	0.766	0.979	-1.05	Ythdf2	YTH domain family 2 [Source:MGI Symbol;Acc:MGI:2444233]
ENSMUSG00000013033	0.000676	0.141	-1.76	0.577	0.994	1.08	6.01e-06	0.000286	-2.05	0.653	0.892	1.06	0.834	0.987	-1.04	Adgrl1	adhesion G protein-coupled receptor L1 [Source:MGI Symbol;Acc:MGI:1929461]
ENSMUSG00000019734	0.0217	0.361	2.57	0.674	0.998	-1.16	0.0814	0.194	1.74	0.451	0.803	1.28	0.178	0.918	1.97	Tmc4	transmembrane channel-like gene family 4 [Source:MGI Symbol;Acc:MGI:2669035]
ENSMUSG00000010914	0.000984	0.169	-1.68	0.538	0.994	-1.08	3.04e-06	0.00018	-2.05	0.55	0.851	-1.08	0.694	0.968	-1.06	Pdhx	pyruvate dehydrogenase complex, component X [Source:MGI Symbol;Acc:MGI:1351627]
ENSMUSG00000021811	0.0219	0.362	1.38	0.531	0.994	1.08	0.352	0.528	1.12	0.739	0.922	1.04	0.331	0.938	-1.15	Dnajc9	DnaJ (Hsp40) homolog, subfamily C, member 9 [Source:MGI Symbol;Acc:MGI:1915326]
ENSMUSG00000026480	0.0219	0.362	4.01	0.515	0.994	1.43	0.0246	0.0861	3.12	0.016	0.218	3.24	0.104	0.917	3.44	Ncf2	neutrophil cytosolic factor 2 [Source:MGI Symbol;Acc:MGI:97284]
ENSMUSG00000064363	0.0166	0.339	-1.63	0.311	0.985	1.19	0.000287	0.00419	-2.05	0.634	0.885	-1.08	0.949	0.996	-1.01	mt-Nd4	mitochondrially encoded NADH dehydrogenase 4 [Source:MGI Symbol;Acc:MGI:102498]
ENSMUSG00000031791	0.0266	0.383	-1.4	0.213	0.942	-1.18	3.95e-06	0.000211	-2.05	0.108	0.472	-1.23	0.402	0.945	-1.14	Tmem38a	transmembrane protein 38A [Source:MGI Symbol;Acc:MGI:1921416]
ENSMUSG00000035983	0.022	0.362	3.54	0.233	0.951	1.69	0.36	0.536	-1.51	0.953	0.989	1.02	0.0997	0.917	2.75	Gm7008	predicted gene 7008 [Source:MGI Symbol;Acc:MGI:3647211]
ENSMUSG00000024955	0.0548	0.457	-1.46	0.776	0.998	-1.05	0.000138	0.00251	-2.05	0.602	0.874	-1.09	0.552	0.955	-1.13	Esrra	estrogen related receptor, alpha [Source:MGI Symbol;Acc:MGI:1346831]
ENSMUSG00000103409	0.0889	0.513	-1.77	0.107	0.838	-1.59	0.00285	0.0191	-2.05	0.747	0.925	-1.08	0.207	0.918	-1.5	Lsmem2	leucine-rich single-pass membrane protein 2 [Source:MGI Symbol;Acc:MGI:3612240]
ENSMUSG00000021816	0.093	0.52	-1.34	0.524	0.994	-1.1	4.68e-05	0.00121	-2.05	0.0117	0.188	-1.47	0.563	0.955	-1.11	Ppp3cb	protein phosphatase 3, catalytic subunit, beta isoform [Source:MGI Symbol;Acc:MGI:107163]
ENSMUSG00000022013	0.0222	0.362	-2.11	0.524	0.994	-1.2	0.114	0.247	-1.6	0.778	0.935	-1.08	0.417	0.946	1.32	Dnajc15	DnaJ (Hsp40) homolog, subfamily C, member 15 [Source:MGI Symbol;Acc:MGI:1913398]
ENSMUSG00000032251	0.0222	0.362	-1.93	0.785	0.998	-1.07	0.513	0.673	-1.18	0.991	0.998	-1	0.263	0.924	-1.41	Irak1bp1	interleukin-1 receptor-associated kinase 1 binding protein 1 [Source:MGI Symbol;Acc:MGI:1929475]
ENSMUSG00000060180	0.0222	0.362	-1.65	0.604	0.995	1.12	0.0524	0.145	-1.46	0.666	0.896	1.09	0.208	0.918	1.44	Myh13	myosin, heavy polypeptide 13, skeletal muscle [Source:MGI Symbol;Acc:MGI:1339967]
ENSMUSG00000039220	0.0222	0.362	1.51	0.0235	0.604	-1.41	0.469	0.635	-1.11	0.854	0.959	1.03	0.499	0.952	1.13	Ppp1r10	protein phosphatase 1, regulatory subunit 10 [Source:MGI Symbol;Acc:MGI:1289273]
ENSMUSG00000030317	0.2	0.635	-1.43	0.667	0.998	-1.11	0.00311	0.0203	-2.05	0.0755	0.409	-1.49	0.209	0.918	-1.43	Timp4	tissue inhibitor of metalloproteinase 4 [Source:MGI Symbol;Acc:MGI:109125]
ENSMUSG00000106840	0.321	0.725	1.37	0.47	0.992	1.23	0.00832	0.0405	-2.05	0.869	0.963	-1.04	0.838	0.987	-1.08	Gm42790	predicted gene 42790 [Source:MGI Symbol;Acc:MGI:5662927]
ENSMUSG00000047875	0.458	0.804	-1.15	0.0449	0.704	-1.4	0.000105	0.00206	-2.05	0.183	0.583	-1.23	0.0551	0.917	-1.46	Gpr157	G protein-coupled receptor 157 [Source:MGI Symbol;Acc:MGI:2442046]
ENSMUSG00000022788	0.0175	0.339	-1.79	0.184	0.928	-1.31	0.000613	0.00705	-2.25	0.000246	0.0258	-2.51	0.27	0.925	-1.36	Fgd4	FYVE, RhoGEF and PH domain containing 4 [Source:MGI Symbol;Acc:MGI:2183747]
ENSMUSG00000025486	0.000137	0.0682	-2.36	0.473	0.992	1.15	0.000307	0.00443	-2.04	0.817	0.95	1.04	0.848	0.988	1.05	Sirt3	sirtuin 3 [Source:MGI Symbol;Acc:MGI:1927665]
ENSMUSG00000000056	0.00109	0.173	-1.64	0.376	0.991	-1.12	1.91e-06	0.000135	-2.04	0.0103	0.178	-1.38	0.418	0.946	-1.13	Narf	nuclear prelamin A recognition factor [Source:MGI Symbol;Acc:MGI:1914858]
ENSMUSG00000045160	0.0133	0.329	-1.85	0.912	0.998	-1.02	0.00194	0.0149	-2.04	0.396	0.771	-1.19	0.446	0.948	1.22	Bola3	bolA-like 3 (E. coli) [Source:MGI Symbol;Acc:MGI:1925903]
ENSMUSG00000027985	0.0225	0.364	3.35	0.701	0.998	-1.19	0.154	0.302	1.78	0.11	0.475	2.01	0.016	0.723	4.13	Lef1	lymphoid enhancer binding factor 1 [Source:MGI Symbol;Acc:MGI:96770]
ENSMUSG00000026950	0.0437	0.43	-1.42	0.96	0.998	1.01	3.34e-05	0.00099	-2.04	0.00744	0.153	-1.48	0.753	0.979	1.06	Neb	nebulin [Source:MGI Symbol;Acc:MGI:97292]
ENSMUSG00000071711	0.164	0.601	-1.49	0.237	0.953	1.36	0.00612	0.0326	-2.04	0.676	0.898	-1.1	0.993	1	-1	Mpst	mercaptopyruvate sulfurtransferase [Source:MGI Symbol;Acc:MGI:2179733]
ENSMUSG00000014543	0.0226	0.365	4.29	0.465	0.992	1.49	0.246	0.414	1.78	0.441	0.797	1.57	0.101	0.917	3.4	Klra17	killer cell lectin-like receptor, subfamily A, member 17 [Source:MGI Symbol;Acc:MGI:2180674]
ENSMUSG00000061758	0.181	0.619	-1.32	0.941	0.998	1.01	0.00028	0.00412	-2.04	0.0104	0.178	-1.61	0.125	0.917	-1.41	Akr1b10	aldo-keto reductase family 1, member B10 (aldose reductase) [Source:MGI Symbol;Acc:MGI:1915111]
ENSMUSG00000041426	0.0227	0.365	-1.37	0.347	0.99	1.12	0.0192	0.0726	-1.34	0.0647	0.384	-1.24	0.749	0.978	1.05	Hibch	3-hydroxyisobutyryl-Coenzyme A hydrolase [Source:MGI Symbol;Acc:MGI:1923792]
ENSMUSG00000029059	0.189	0.624	-1.38	0.864	0.998	-1.04	0.00215	0.0158	-2.04	0.569	0.86	1.12	0.901	0.994	1.03	Fam213b	family with sequence similarity 213, member B [Source:MGI Symbol;Acc:MGI:1913719]
ENSMUSG00000022003	0.949	0.99	-1.02	5.94e-05	0.0615	-2.69	0.00309	0.0202	-2.04	0.0414	0.32	1.66	0.186	0.918	1.49	Slc25a30	solute carrier family 25, member 30 [Source:MGI Symbol;Acc:MGI:1914804]
ENSMUSG00000032051	0.0228	0.365	-1.73	0.304	0.984	1.24	0.0769	0.187	-1.47	0.0659	0.388	-1.46	0.77	0.98	1.08	Fdx1	ferredoxin 1 [Source:MGI Symbol;Acc:MGI:103224]
ENSMUSG00000002781	0.0371	0.414	-1.49	0.528	0.994	-1.11	0.000114	0.00221	-2.03	0.0876	0.436	-1.31	0.944	0.996	-1.01	Tmem143	transmembrane protein 143 [Source:MGI Symbol;Acc:MGI:1917459]
ENSMUSG00000004931	0.039	0.419	-1.52	0.852	0.998	1.03	0.000159	0.0028	-2.03	0.13	0.512	-1.28	0.656	0.963	1.1	Apba3	amyloid beta (A4) precursor protein-binding, family A, member 3 [Source:MGI Symbol;Acc:MGI:1888527]
ENSMUSG00000061535	0.0228	0.365	2.83	0.539	0.994	1.29	0.592	0.737	1.23	0.0529	0.353	2.38	0.557	0.955	1.33	C1qtnf7	C1q and tumor necrosis factor related protein 7 [Source:MGI Symbol;Acc:MGI:1925911]
ENSMUSG00000025579	0.0765	0.498	-1.37	0.0635	0.752	-1.34	7.68e-05	0.00166	-2.03	0.0135	0.202	-1.47	0.181	0.918	-1.28	Gaa	glucosidase, alpha, acid [Source:MGI Symbol;Acc:MGI:95609]
ENSMUSG00000078486	0.1	0.526	-1.34	0.823	0.998	-1.04	7.24e-05	0.0016	-2.03	0.0737	0.405	-1.31	0.684	0.967	-1.08	Perm1	PPARGC1 and ESRR induced regulator, muscle 1 [Source:MGI Symbol;Acc:MGI:1921433]
ENSMUSG00000071454	0.219	0.654	-1.45	0.437	0.992	-1.23	0.00672	0.0349	-2.03	0.707	0.91	1.11	0.13	0.917	1.88	Dtnb	dystrobrevin, beta [Source:MGI Symbol;Acc:MGI:1203728]
ENSMUSG00000030401	0.237	0.671	-1.21	0.539	0.994	-1.09	1.62e-05	0.000608	-2.03	0.261	0.664	-1.17	0.186	0.918	-1.25	Rtn2	reticulon 2 (Z-band associated protein) [Source:MGI Symbol;Acc:MGI:107612]
ENSMUSG00000050947	0.023	0.367	1.33	0.703	0.998	-1.04	0.411	0.583	1.1	0.725	0.916	-1.04	0.639	0.96	1.06	Amigo1	adhesion molecule with Ig like domain 1 [Source:MGI Symbol;Acc:MGI:2653612]
ENSMUSG00000042607	0.0554	0.46	-1.68	0.44	0.992	-1.2	5.21e-06	0.000261	-3.38	0.000233	0.0258	-2.5	0.22	0.918	-1.42	Asb4	ankyrin repeat and SOCS box-containing 4 [Source:MGI Symbol;Acc:MGI:1929751]
ENSMUSG00000035455	0.0231	0.367	4.96	0.19	0.929	2.38	0.107	0.235	2.7	0.512	0.834	1.49	0.087	0.917	5.1	Fignl1	fidgetin-like 1 [Source:MGI Symbol;Acc:MGI:1890648]
ENSMUSG00000041075	0.309	0.72	-1.25	0.214	0.942	-1.27	0.00081	0.0084	-2.03	0.00176	0.0755	-1.85	0.22	0.918	-1.34	Fzd7	frizzled homolog 7 (Drosophila) [Source:MGI Symbol;Acc:MGI:108570]
ENSMUSG00000056665	0.995	0.999	-1	0.0261	0.619	-1.56	0.000411	0.00535	-2.03	0.00598	0.138	-1.68	0.32	0.936	-1.24	Them6	thioesterase superfamily member 6 [Source:MGI Symbol;Acc:MGI:1925301]
ENSMUSG00000098184	0.0232	0.368	4	0.0129	0.496	3.7	0.0648	0.167	2.84	0.724	0.916	1.19	0.621	0.957	1.37	Gm27011	predicted gene, 27011 [Source:MGI Symbol;Acc:MGI:5504126]
ENSMUSG00000072324	0.0232	0.368	4.74	0.367	0.991	1.61	0.517	0.676	1.48	0.786	0.939	1.21	0.882	0.992	1.14	Gm8420	predicted gene 8420 [Source:MGI Symbol;Acc:MGI:3645594]
ENSMUSG00000038280	0.00615	0.263	-1.66	0.184	0.928	-1.23	7.79e-05	0.00167	-2.02	0.0546	0.357	-1.34	0.298	0.934	-1.22	Ostm1	osteopetrosis associated transmembrane protein 1 [Source:MGI Symbol;Acc:MGI:2655574]
ENSMUSG00000103047	0.0234	0.369	-3.48	0.348	0.99	1.59	0.69	0.81	1.26	0.757	0.928	1.21	0.85	0.988	1.14	Gm37310	predicted gene, 37310 [Source:MGI Symbol;Acc:MGI:5610538]
ENSMUSG00000020357	0.0234	0.369	-1.5	0.113	0.852	-1.29	0.0324	0.103	-1.39	0.105	0.467	-1.28	0.233	0.918	-1.27	Flt4	FMS-like tyrosine kinase 4 [Source:MGI Symbol;Acc:MGI:95561]
ENSMUSG00000005583	0.018	0.339	-1.45	0.877	0.998	-1.02	8.7e-06	0.000378	-2.02	0.717	0.913	1.05	0.441	0.947	1.13	Mef2c	myocyte enhancer factor 2C [Source:MGI Symbol;Acc:MGI:99458]
ENSMUSG00000029480	0.0234	0.369	1.53	0.96	0.998	1.01	0.47	0.636	1.12	0.46	0.807	1.12	0.762	0.979	1.06	Dhx37	DEAH (Asp-Glu-Ala-His) box polypeptide 37 [Source:MGI Symbol;Acc:MGI:3028576]
ENSMUSG00000026893	0.0775	0.498	-1.61	0.551	0.994	1.17	0.00294	0.0195	-2.02	0.0232	0.254	-1.81	0.269	0.925	-1.39	Gca	grancalcin [Source:MGI Symbol;Acc:MGI:1918521]
ENSMUSG00000074652	0.185	0.623	-1.38	0.367	0.991	-1.28	0.00207	0.0155	-2.02	0.0855	0.432	1.46	0.216	0.918	1.44	Myh7b	myosin, heavy chain 7B, cardiac muscle, beta [Source:MGI Symbol;Acc:MGI:3710243]
ENSMUSG00000017697	0.0235	0.369	4.16	0.158	0.906	2.37	0.0162	0.0647	4.05	0.1	0.461	2.34	0.399	0.944	1.78	Ada	adenosine deaminase [Source:MGI Symbol;Acc:MGI:87916]
ENSMUSG00000057137	0.115	0.545	1.52	0.162	0.908	1.39	0.316	0.491	1.23	0.000253	0.0261	-2.48	0.0747	0.917	-1.72	Tmem140	transmembrane protein 140 [Source:MGI Symbol;Acc:MGI:1915737]
ENSMUSG00000056899	0.000682	0.141	-2.58	0.13	0.871	-1.39	0.00252	0.0177	-2.01	0.242	0.649	-1.25	0.481	0.95	-1.21	Immp2l	IMP2 inner mitochondrial membrane peptidase-like (S. cerevisiae) [Source:MGI Symbol;Acc:MGI:2135611]
ENSMUSG00000022890	0.0236	0.37	-1.93	0.946	0.998	-1.02	0.022	0.0798	-1.85	0.295	0.694	-1.29	0.498	0.952	1.22	Atp5j	ATP synthase, H+ transporting, mitochondrial F0 complex, subunit F [Source:MGI Symbol;Acc:MGI:107777]
ENSMUSG00000042155	0.00512	0.244	-1.84	0.696	0.998	1.07	0.000648	0.00728	-2.01	0.123	0.497	1.31	0.759	0.979	1.07	Klhl23	kelch-like 23 [Source:MGI Symbol;Acc:MGI:2683536]
ENSMUSG00000033423	0.0115	0.314	-1.44	0.0519	0.722	-1.28	1.32e-06	0.000101	-2.01	0.328	0.717	-1.12	0.649	0.962	-1.07	Eri3	exoribonuclease 3 [Source:MGI Symbol;Acc:MGI:2153887]
ENSMUSG00000025507	0.0237	0.37	2.26	0.0285	0.626	2.01	0.0596	0.158	1.67	0.993	0.999	-1	0.179	0.918	1.77	Pidd1	p53 induced death domain protein 1 [Source:MGI Symbol;Acc:MGI:1889507]
ENSMUSG00000021622	0.0147	0.331	-1.84	0.678	0.998	-1.09	0.00315	0.0205	-2.01	0.531	0.842	-1.14	0.578	0.955	1.15	Ckmt2	creatine kinase, mitochondrial 2 [Source:MGI Symbol;Acc:MGI:1923972]
ENSMUSG00000033152	0.0941	0.521	-1.57	0.632	0.997	-1.12	0.00411	0.0246	-2.01	0.632	0.884	-1.11	0.627	0.959	-1.15	Podxl2	podocalyxin-like 2 [Source:MGI Symbol;Acc:MGI:2442488]
ENSMUSG00000020225	0.0239	0.371	-1.68	0.161	0.907	-1.34	0.321	0.497	-1.22	0.578	0.864	-1.11	0.309	0.934	1.29	Tmbim4	transmembrane BAX inhibitor motif containing 4 [Source:MGI Symbol;Acc:MGI:1915462]
ENSMUSG00000052139	0.0239	0.371	-1.5	0.24	0.954	1.21	0.213	0.376	-1.21	0.673	0.898	-1.06	0.137	0.917	1.35	Bre	brain and reproductive organ-expressed protein [Source:MGI Symbol;Acc:MGI:1333875]
ENSMUSG00000005674	0.129	0.56	-1.52	0.72	0.998	-1.1	0.00316	0.0205	-2.01	0.308	0.703	-1.26	0.955	0.997	-1.02	Tomm40l	translocase of outer mitochondrial membrane 40 homolog-like (yeast) [Source:MGI Symbol;Acc:MGI:3589112]
ENSMUSG00000007030	0.298	0.713	-1.2	0.234	0.953	-1.19	2.52e-05	0.000821	-2.01	0.391	0.767	1.13	0.0684	0.917	-1.38	Vwa7	von Willebrand factor A domain containing 7 [Source:MGI Symbol;Acc:MGI:1306798]
ENSMUSG00000072623	0.781	0.941	-1.07	0.148	0.893	-1.35	0.00132	0.0116	-2.01	0.152	0.543	-1.33	0.867	0.99	1.04	Zfp9	zinc finger protein 9 [Source:MGI Symbol;Acc:MGI:99210]
ENSMUSG00000014633	0.000417	0.113	-2.19	0.311	0.985	-1.21	0.000361	0.00492	-2	0.752	0.926	-1.05	0.327	0.938	1.26	Cmc2	COX assembly mitochondrial protein 2 [Source:MGI Symbol;Acc:MGI:1913781]
ENSMUSG00000019916	0.024	0.371	-1.41	0.0487	0.711	-1.3	0.0441	0.128	-1.33	0.0119	0.188	-1.39	0.773	0.98	-1.05	P4ha1	procollagen-proline, 2-oxoglutarate 4-dioxygenase (proline 4-hydroxylase), alpha 1 polypeptide [Source:MGI Symbol;Acc:MGI:97463]
ENSMUSG00000030650	0.0241	0.371	-4.37	0.443	0.992	1.61	0.791	0.879	-1.17	0.692	0.905	1.24	0.36	0.94	-1.87	Tmc5	transmembrane channel-like gene family 5 [Source:MGI Symbol;Acc:MGI:1921674]
ENSMUSG00000047867	0.0241	0.371	-1.56	0.916	0.998	-1.02	0.0791	0.191	-1.36	0.00336	0.104	-1.66	0.312	0.935	1.26	Gimap6	GTPase, IMAP family member 6 [Source:MGI Symbol;Acc:MGI:1918876]
ENSMUSG00000019179	0.00224	0.199	-1.71	0.533	0.994	-1.1	4.24e-05	0.00114	-2	0.948	0.987	1.01	0.799	0.984	1.05	Mdh2	malate dehydrogenase 2, NAD (mitochondrial) [Source:MGI Symbol;Acc:MGI:97050]
ENSMUSG00000029270	0.0168	0.339	-1.63	0.0988	0.821	-1.33	0.000312	0.00448	-2	0.184	0.584	-1.25	0.429	0.946	-1.18	Fam69a	family with sequence similarity 69, member A [Source:MGI Symbol;Acc:MGI:1914516]
ENSMUSG00000038084	0.0458	0.44	-1.33	0.489	0.993	-1.09	2.52e-06	0.000158	-2	0.052	0.349	-1.27	0.765	0.979	-1.05	Opa1	optic atrophy 1 [Source:MGI Symbol;Acc:MGI:1921393]
ENSMUSG00000009575	0.0241	0.371	1.35	0.257	0.963	-1.14	0.847	0.914	1.02	0.897	0.972	1.01	0.717	0.971	-1.05	Cbx5	chromobox 5 [Source:MGI Symbol;Acc:MGI:109372]
ENSMUSG00000022347	0.0242	0.371	-3.29	0.549	0.994	-1.35	0.994	0.996	-1	0.0464	0.336	-2.57	0.772	0.98	1.22	A1bg	alpha-1-B glycoprotein [Source:MGI Symbol;Acc:MGI:2152878]
ENSMUSG00000026187	0.0485	0.447	-1.4	0.937	0.998	1.01	3.53e-05	0.00102	-2	0.0364	0.305	-1.35	0.114	0.917	-1.33	Xrcc5	X-ray repair complementing defective repair in Chinese hamster cells 5 [Source:MGI Symbol;Acc:MGI:104517]
ENSMUSG00000042686	0.0792	0.501	-1.33	0.351	0.99	-1.14	2.13e-05	0.000729	-2	0.0247	0.262	-1.37	0.409	0.945	-1.15	Jph1	junctophilin 1 [Source:MGI Symbol;Acc:MGI:1891495]
ENSMUSG00000020311	0.0242	0.371	-1.3	0.205	0.937	1.14	0.132	0.27	-1.17	0.182	0.581	-1.14	0.968	0.998	-1	Erlec1	endoplasmic reticulum lectin 1 [Source:MGI Symbol;Acc:MGI:1914003]
ENSMUSG00000000317	0.0243	0.372	-2.04	0.512	0.994	1.24	0.137	0.277	-1.51	0.17	0.565	1.52	0.392	0.944	1.49	Bcl6b	B cell CLL/lymphoma 6, member B [Source:MGI Symbol;Acc:MGI:1278332]
ENSMUSG00000083072	0.0244	0.372	-2.78	0.726	0.998	-1.14	0.112	0.243	2.01	0.455	0.804	-1.31	0.132	0.917	2.42	Gm13668	predicted gene 13668 [Source:MGI Symbol;Acc:MGI:3650878]
ENSMUSG00000002846	0.0244	0.372	-1.52	0.849	0.998	-1.03	0.012	0.0523	-1.52	0.027	0.27	-1.42	0.495	0.952	-1.15	Timmdc1	translocase of inner mitochondrial membrane domain containing 1 [Source:MGI Symbol;Acc:MGI:1922139]
ENSMUSG00000020390	0.0843	0.508	-1.32	0.247	0.959	-1.18	2.01e-05	0.000697	-2	0.00263	0.094	-1.53	0.147	0.918	-1.28	Ube2b	ubiquitin-conjugating enzyme E2B [Source:MGI Symbol;Acc:MGI:102944]
ENSMUSG00000028949	0.101	0.526	-1.38	0.859	0.998	1.03	0.00023	0.00363	-2	0.901	0.973	-1.02	0.986	0.999	1	Smarcd3	SWI/SNF related, matrix associated, actin dependent regulator of chromatin, subfamily d, member 3 [Source:MGI Symbol;Acc:MGI:1914243]
ENSMUSG00000042810	0.225	0.659	-1.22	0.464	0.992	-1.11	2.45e-05	0.000807	-2	0.0811	0.422	-1.28	0.0114	0.633	-1.57	Krba1	KRAB-A domain containing 1 [Source:MGI Symbol;Acc:MGI:1925077]
ENSMUSG00000024790	0.234	0.667	-1.35	0.967	0.999	1.01	0.0015	0.0126	-2	0.766	0.931	1.06	0.611	0.956	1.15	Sac3d1	SAC3 domain containing 1 [Source:MGI Symbol;Acc:MGI:1913656]
ENSMUSG00000078651	0.0247	0.374	2.23	0.803	0.998	-1.09	0.582	0.729	1.17	0.424	0.785	-1.29	0.606	0.956	1.24	Aoc2	amine oxidase, copper containing 2 (retina-specific) [Source:MGI Symbol;Acc:MGI:2668431]
ENSMUSG00000035228	0.0247	0.374	2.94	0.656	0.998	-1.2	0.0117	0.0515	3.5	0.00809	0.159	2.69	0.614	0.957	1.32	Ccdc106	coiled-coil domain containing 106 [Source:MGI Symbol;Acc:MGI:2385900]
ENSMUSG00000040121	0.0247	0.374	3.34	0.853	0.998	-1.1	0.846	0.913	1.09	0.317	0.708	1.64	0.033	0.861	-3.11	Rep15	RAB15 effector protein [Source:MGI Symbol;Acc:MGI:1913782]
ENSMUSG00000003346	0.00581	0.257	-2.03	0.568	0.994	-1.13	0.00317	0.0206	-1.99	0.521	0.839	-1.14	0.36	0.94	1.28	Abhd17a	abhydrolase domain containing 17A [Source:MGI Symbol;Acc:MGI:106388]
ENSMUSG00000047485	0.721	0.917	-1.1	0.536	0.994	-1.16	0.0118	0.0518	-1.79	0.000266	0.0264	-2.46	0.504	0.952	-1.22	Klhl34	kelch-like 34 [Source:MGI Symbol;Acc:MGI:2685234]
ENSMUSG00000026755	0.0227	0.365	-1.56	0.534	0.994	1.11	0.000229	0.00362	-1.99	0.241	0.648	-1.21	0.86	0.99	1.04	Arpc5l	actin related protein 2/3 complex, subunit 5-like [Source:MGI Symbol;Acc:MGI:1921442]
ENSMUSG00000001018	0.0249	0.375	-1.33	0.737	0.998	1.04	0.0306	0.0996	-1.29	0.0987	0.458	-1.19	0.775	0.98	-1.04	Snapin	SNAP-associated protein [Source:MGI Symbol;Acc:MGI:1333745]
ENSMUSG00000060376	0.0377	0.415	-1.42	0.0624	0.75	-1.32	3.46e-05	0.00101	-1.99	0.121	0.495	-1.25	0.307	0.934	-1.2	Bckdha	branched chain ketoacid dehydrogenase E1, alpha polypeptide [Source:MGI Symbol;Acc:MGI:107701]
ENSMUSG00000048240	0.0494	0.449	-1.74	0.0918	0.813	-1.54	0.00709	0.0362	-1.99	0.499	0.828	1.16	0.461	0.948	-1.25	Gng7	guanine nucleotide binding protein (G protein), gamma 7 [Source:MGI Symbol;Acc:MGI:95787]
ENSMUSG00000035637	0.0535	0.455	-1.55	0.687	0.998	-1.08	0.00108	0.0102	-1.99	0.411	0.777	-1.16	0.553	0.955	1.16	Grhpr	glyoxylate reductase/hydroxypyruvate reductase [Source:MGI Symbol;Acc:MGI:1923488]
ENSMUSG00000031958	0.236	0.671	-1.27	0.995	1	-1	0.000421	0.00545	-1.99	0.477	0.816	-1.13	0.853	0.988	-1.04	Ldhd	lactate dehydrogenase D [Source:MGI Symbol;Acc:MGI:106428]
ENSMUSG00000022194	0.025	0.375	1.62	0.786	0.998	-1.05	0.27	0.441	1.21	0.135	0.519	1.29	0.76	0.979	-1.07	Pabpn1	poly(A) binding protein, nuclear 1 [Source:MGI Symbol;Acc:MGI:1859158]
ENSMUSG00000008892	0.535	0.843	-1.11	0.339	0.99	-1.16	8.32e-05	0.00176	-1.99	0.0823	0.424	-1.3	0.182	0.918	-1.28	Vdac3	voltage-dependent anion channel 3 [Source:MGI Symbol;Acc:MGI:106922]
ENSMUSG00000040464	0.0251	0.375	-1.37	0.89	0.998	1.02	0.0256	0.0883	-1.33	0.913	0.976	1.01	0.695	0.968	-1.06	Gtpbp10	GTP-binding protein 10 (putative) [Source:MGI Symbol;Acc:MGI:2385599]
ENSMUSG00000027018	0.0251	0.375	-1.34	0.486	0.993	1.08	0.852	0.917	-1.02	0.501	0.829	1.08	0.34	0.938	1.15	Hat1	histone aminotransferase 1 [Source:MGI Symbol;Acc:MGI:96013]
ENSMUSG00000000078	0.0251	0.375	1.6	0.427	0.992	-1.16	0.0132	0.0558	1.62	0.313	0.706	-1.19	0.751	0.978	1.07	Klf6	Kruppel-like factor 6 [Source:MGI Symbol;Acc:MGI:1346318]
ENSMUSG00000041040	0.0251	0.375	1.86	0.398	0.992	-1.2	0.226	0.391	1.31	0.3	0.696	-1.25	0.00954	0.595	-1.96	Fam117b	family with sequence similarity 117, member B [Source:MGI Symbol;Acc:MGI:1920000]
ENSMUSG00000031661	0.0252	0.376	-2.1	0.749	0.998	1.12	0.553	0.705	-1.2	0.43	0.789	-1.29	0.00378	0.416	-3.28	Nkd1	naked cuticle 1 homolog (Drosophila) [Source:MGI Symbol;Acc:MGI:2135954]
ENSMUSG00000020544	0.646	0.888	-1.12	0.914	0.998	1.03	0.00191	0.0148	-1.99	0.132	0.515	-1.35	0.894	0.993	-1.04	Cox11	cytochrome c oxidase assembly protein 11 [Source:MGI Symbol;Acc:MGI:1917052]
ENSMUSG00000060548	0.259	0.685	1.34	0.0947	0.814	1.47	0.065	0.168	1.54	0.000608	0.0428	-2.43	0.0376	0.903	-1.94	Tnfrsf19	tumor necrosis factor receptor superfamily, member 19 [Source:MGI Symbol;Acc:MGI:1352474]
ENSMUSG00000049969	0.0252	0.376	1.5	0.937	0.998	-1.01	0.0714	0.178	1.33	0.794	0.942	-1.04	0.238	0.921	1.24	Plekhf2	pleckstrin homology domain containing, family F (with FYVE domain) member 2 [Source:MGI Symbol;Acc:MGI:1919051]
ENSMUSG00000021493	0.0159	0.337	-1.93	0.417	0.992	-1.21	0.00716	0.0365	-1.98	0.495	0.827	-1.17	0.816	0.987	1.07	Pdlim7	PDZ and LIM domain 7 [Source:MGI Symbol;Acc:MGI:1914649]
ENSMUSG00000024160	0.0313	0.398	-1.69	0.916	0.998	1.02	0.00127	0.0113	-1.98	0.195	0.596	-1.27	0.696	0.968	-1.11	Spsb3	splA/ryanodine receptor domain and SOCS box containing 3 [Source:MGI Symbol;Acc:MGI:1891471]
ENSMUSG00000019990	0.0667	0.486	-1.46	0.131	0.871	-1.31	0.000603	0.00697	-1.98	0.0217	0.249	-1.52	0.388	0.943	-1.21	Pde7b	phosphodiesterase 7B [Source:MGI Symbol;Acc:MGI:1352752]
ENSMUSG00000044229	0.0254	0.376	-1.51	0.141	0.886	-1.3	0.0786	0.19	-1.35	0.295	0.694	-1.19	0.542	0.955	1.15	Nxpe4	neurexophilin and PC-esterase domain family, member 4 [Source:MGI Symbol;Acc:MGI:1924792]
ENSMUSG00000045896	0.0934	0.521	-1.29	0.0397	0.679	-1.32	1.01e-05	0.000426	-1.98	0.0106	0.18	-1.4	0.0061	0.53	-1.57	Paip2b	poly(A) binding protein interacting protein 2B [Source:MGI Symbol;Acc:MGI:2386865]
ENSMUSG00000015846	0.166	0.603	-1.24	0.391	0.991	-1.12	1.37e-05	0.000542	-1.98	0.0804	0.42	-1.26	0.223	0.918	-1.22	Rxra	retinoid X receptor alpha [Source:MGI Symbol;Acc:MGI:98214]
ENSMUSG00000024525	0.0255	0.377	-2.06	0.636	0.997	-1.16	0.703	0.82	-1.13	0.165	0.561	1.49	0.489	0.95	1.33	Impa2	inositol (myo)-1(or 4)-monophosphatase 2 [Source:MGI Symbol;Acc:MGI:2149728]
ENSMUSG00000040276	0.0256	0.378	-3.06	0.196	0.934	1.98	0.305	0.479	-1.75	0.0168	0.223	3.57	0.199	0.918	-1.98	Pacsin1	protein kinase C and casein kinase substrate in neurons 1 [Source:MGI Symbol;Acc:MGI:1345181]
ENSMUSG00000029512	0.203	0.638	-1.27	0.426	0.992	-1.14	0.000257	0.00387	-1.98	0.00122	0.0633	-1.73	0.0276	0.842	-1.57	Ulk1	unc-51 like kinase 1 [Source:MGI Symbol;Acc:MGI:1270126]
ENSMUSG00000024617	0.23	0.663	-1.27	0.356	0.991	-1.18	0.000511	0.00622	-1.98	0.213	0.616	-1.24	0.433	0.946	-1.18	Camk2a	calcium/calmodulin-dependent protein kinase II alpha [Source:MGI Symbol;Acc:MGI:88256]
ENSMUSG00000065530	0.0257	0.378	4	0.207	0.938	1.9	0.278	0.45	1.74	0.927	0.981	1.05	0.864	0.99	-1.11	Mir99a	microRNA 99a [Source:MGI Symbol;Acc:MGI:2676912]
ENSMUSG00000083863	0.0258	0.378	-1.8	0.757	0.998	1.07	0.0256	0.0885	-1.67	0.299	0.695	-1.25	0.209	0.918	1.46	Gm13341	predicted gene 13341 [Source:MGI Symbol;Acc:MGI:3650228]
ENSMUSG00000030539	0.0258	0.378	1.8	0.948	0.998	1.01	0.449	0.618	1.16	0.105	0.467	1.44	0.445	0.948	1.24	Sema4b	sema domain, immunoglobulin domain (Ig), transmembrane domain (TM) and short cytoplasmic domain, (semaphorin) 4B [Source:MGI Symbol;Acc:MGI:107559]
ENSMUSG00000092260	0.0258	0.378	1.9	0.0876	0.809	-1.52	0.613	0.753	1.11	0.72	0.914	1.07	0.0992	0.917	1.62	Zfp963	zinc finger protein 963 [Source:MGI Symbol;Acc:MGI:4867078]
ENSMUSG00000035890	0.282	0.702	-1.26	0.0257	0.619	-1.56	0.000656	0.00732	-1.98	0.165	0.561	-1.28	0.268	0.925	-1.28	Rnf126	ring finger protein 126 [Source:MGI Symbol;Acc:MGI:1917544]
ENSMUSG00000039156	0.314	0.722	-1.19	0.173	0.923	-1.23	7.77e-05	0.00167	-1.98	0.258	0.662	-1.18	0.235	0.919	-1.24	Stim2	stromal interaction molecule 2 [Source:MGI Symbol;Acc:MGI:2151156]
ENSMUSG00000027102	0.468	0.81	-1.13	0.542	0.994	-1.1	2.04e-05	0.000702	-1.98	0.253	0.658	-1.16	0.0553	0.917	-1.39	Hoxd8	homeobox D8 [Source:MGI Symbol;Acc:MGI:96209]
ENSMUSG00000042148	0.00671	0.266	-1.64	0.286	0.974	-1.18	8.63e-05	0.00181	-1.97	0.0724	0.401	-1.31	0.439	0.946	-1.16	Cox10	cytochrome c oxidase assembly protein 10 [Source:MGI Symbol;Acc:MGI:1917633]
ENSMUSG00000031861	0.0259	0.378	3.47	0.997	1	1	0.187	0.345	1.66	0.175	0.571	1.91	0.327	0.938	-1.72	Lpar2	lysophosphatidic acid receptor 2 [Source:MGI Symbol;Acc:MGI:1858422]
ENSMUSG00000021294	0.026	0.378	-1.68	0.674	0.998	1.1	0.0526	0.145	-1.47	0.19	0.59	-1.3	0.67	0.964	1.13	Kif26a	kinesin family member 26A [Source:MGI Symbol;Acc:MGI:2447072]
ENSMUSG00000032135	0.026	0.378	-1.38	0.878	0.998	-1.02	0.817	0.895	1.03	0.0409	0.319	1.29	0.83	0.987	1.03	Mcam	melanoma cell adhesion molecule [Source:MGI Symbol;Acc:MGI:1933966]
ENSMUSG00000034795	0.026	0.378	2.27	0.488	0.993	1.2	0.871	0.928	-1.05	0.629	0.883	1.15	0.0531	0.917	-1.97	Ccdc122	coiled-coil domain containing 122 [Source:MGI Symbol;Acc:MGI:1918358]
ENSMUSG00000015755	0.0202	0.356	-1.37	0.322	0.986	-1.12	1.09e-06	9.28e-05	-1.97	0.016	0.218	-1.32	0.0722	0.917	-1.29	Tab2	TGF-beta activated kinase 1/MAP3K7 binding protein 2 [Source:MGI Symbol;Acc:MGI:1915902]
ENSMUSG00000029924	0.0261	0.38	1.3	0.627	0.997	-1.05	0.0615	0.162	1.21	0.624	0.882	1.05	0.364	0.94	-1.12	Slc37a3	solute carrier family 37 (glycerol-3-phosphate transporter), member 3 [Source:MGI Symbol;Acc:MGI:1919394]
ENSMUSG00000022546	0.0262	0.38	-1.7	0.677	0.998	-1.09	0.0609	0.161	-1.51	0.152	0.544	1.33	0.567	0.955	1.16	Gpt	glutamic pyruvic transaminase, soluble [Source:MGI Symbol;Acc:MGI:95802]
ENSMUSG00000041769	0.0262	0.38	-1.55	0.936	0.998	-1.01	0.0172	0.0672	-1.51	0.0205	0.243	-1.46	0.542	0.955	-1.14	Ppp2r2d	protein phosphatase 2, regulatory subunit B, delta [Source:MGI Symbol;Acc:MGI:1289252]
ENSMUSG00000097487	0.0345	0.409	-1.81	0.413	0.992	-1.22	0.00968	0.045	-1.97	0.467	0.81	1.18	0.945	0.996	1.02	Ptges3l	prostaglandin E synthase 3 (cytosolic)-like [Source:MGI Symbol;Acc:MGI:1916146]
ENSMUSG00000020089	0.0263	0.38	-1.33	0.0092	0.45	1.36	0.294	0.467	1.13	0.772	0.933	-1.03	0.938	0.996	1.01	Ppa1	pyrophosphatase (inorganic) 1 [Source:MGI Symbol;Acc:MGI:97831]
ENSMUSG00000028337	0.0264	0.382	3.06	0.698	0.998	1.22	0.0126	0.0541	3.41	0.189	0.59	1.86	0.637	0.96	1.3	Coro2a	coronin, actin binding protein 2A [Source:MGI Symbol;Acc:MGI:1345966]
ENSMUSG00000034981	0.078	0.499	-1.42	0.494	0.993	1.12	0.000422	0.00546	-1.97	0.205	0.607	1.23	0.49	0.951	1.15	Parm1	prostate androgen-regulated mucin-like protein 1 [Source:MGI Symbol;Acc:MGI:2443349]
ENSMUSG00000024817	0.0265	0.383	1.36	0.312	0.986	1.13	0.0514	0.143	1.27	0.945	0.986	1.01	0.924	0.995	-1.01	Uhrf2	ubiquitin-like, containing PHD and RING finger domains 2 [Source:MGI Symbol;Acc:MGI:1923718]
ENSMUSG00000081944	0.3	0.714	-1.35	0.555	0.994	1.16	0.00686	0.0354	-1.97	0.509	0.833	-1.16	0.841	0.988	1.07	Gm12276	predicted gene 12276 [Source:MGI Symbol;Acc:MGI:3649700]
ENSMUSG00000105176	0.325	0.726	-1.24	0.924	0.998	1.02	0.00139	0.0121	-1.97	0.998	1	-1	0.915	0.994	-1.03	Gm43668	predicted gene 43668 [Source:MGI Symbol;Acc:MGI:5663805]
ENSMUSG00000029553	0.0267	0.384	3.71	0.491	0.993	1.53	0.0148	0.0604	4.11	0.00213	0.0846	5.31	0.0625	0.917	4	Tfec	transcription factor EC [Source:MGI Symbol;Acc:MGI:1333760]
ENSMUSG00000029402	0.42	0.784	-1.26	0.707	0.998	-1.11	0.00676	0.035	-1.97	0.383	0.761	-1.22	0.837	0.987	1.07	Snrnp35	small nuclear ribonucleoprotein 35 (U11/U12) [Source:MGI Symbol;Acc:MGI:1923417]
ENSMUSG00000038872	0.426	0.787	-1.18	0.379	0.991	-1.18	0.000828	0.00854	-1.97	0.118	0.491	-1.32	0.29	0.928	-1.26	Zfhx3	zinc finger homeobox 3 [Source:MGI Symbol;Acc:MGI:99948]
ENSMUSG00000026675	0.875	0.97	-1.04	0.324	0.986	-1.26	0.00414	0.0247	-1.97	0.102	0.464	-1.41	0.109	0.917	-1.54	Hsd17b7	hydroxysteroid (17-beta) dehydrogenase 7 [Source:MGI Symbol;Acc:MGI:1330808]
ENSMUSG00000020838	0.0269	0.385	4.01	0.0346	0.655	-2.89	0.856	0.92	1.07	0.747	0.925	1.13	0.408	0.945	-1.52	Slc6a4	solute carrier family 6 (neurotransmitter transporter, serotonin), member 4 [Source:MGI Symbol;Acc:MGI:96285]
ENSMUSG00000029001	0.00113	0.173	-1.95	0.214	0.942	-1.23	0.000189	0.00315	-1.96	0.267	0.669	-1.19	0.127	0.917	-1.37	Fbxo44	F-box protein 44 [Source:MGI Symbol;Acc:MGI:1354744]
ENSMUSG00000022598	0.027	0.386	-4.27	0.447	0.992	-1.56	0.444	0.614	-1.54	0.976	0.994	-1.02	0.898	0.994	-1.11	Psca	prostate stem cell antigen [Source:MGI Symbol;Acc:MGI:1919623]
ENSMUSG00000034101	0.027	0.386	1.52	0.843	0.998	-1.03	0.166	0.318	1.24	0.101	0.462	1.28	0.789	0.982	-1.05	Ctnnd1	catenin (cadherin associated protein), delta 1 [Source:MGI Symbol;Acc:MGI:105100]
ENSMUSG00000030701	0.428	0.789	-1.17	0.0042	0.337	-1.68	0.0152	0.0614	-1.56	2.66e-06	0.00123	-2.43	0.0578	0.917	-1.51	Plekhb1	pleckstrin homology domain containing, family B (evectins) member 1 [Source:MGI Symbol;Acc:MGI:1351469]
ENSMUSG00000101102	0.00117	0.173	-2.16	0.492	0.993	1.15	0.00193	0.0149	-1.96	0.321	0.712	-1.23	0.622	0.957	1.13	Gm28609	predicted gene 28609 [Source:MGI Symbol;Acc:MGI:5579315]
ENSMUSG00000034295	0.0026	0.199	-1.54	0.0731	0.772	-1.25	2.28e-06	0.00015	-1.96	0.708	0.91	-1.04	0.545	0.955	-1.09	Fhod3	formin homology 2 domain containing 3 [Source:MGI Symbol;Acc:MGI:1925847]
ENSMUSG00000098240	0.0271	0.386	-2.5	0.0591	0.74	2.34	0.087	0.204	-1.92	0.719	0.914	-1.14	0.611	0.956	-1.26	Gm4575	predicted gene 4575 [Source:MGI Symbol;Acc:MGI:3782758]
ENSMUSG00000091803	0.0271	0.386	-1.74	0.313	0.986	1.25	0.155	0.303	-1.36	0.183	0.583	-1.32	0.134	0.917	1.53	Cox16	cytochrome c oxidase assembly protein 16 [Source:MGI Symbol;Acc:MGI:1913522]
ENSMUSG00000022462	0.0271	0.386	1.59	0.579	0.994	-1.1	0.766	0.862	1.06	0.927	0.981	-1.02	0.166	0.918	1.35	Slc38a2	solute carrier family 38, member 2 [Source:MGI Symbol;Acc:MGI:1915010]
ENSMUSG00000020027	0.0272	0.386	-2.04	0.84	0.998	-1.06	0.486	0.649	-1.22	0.755	0.928	1.11	0.436	0.946	1.36	Socs2	suppressor of cytokine signaling 2 [Source:MGI Symbol;Acc:MGI:1201787]
ENSMUSG00000032657	0.00868	0.287	-1.78	0.278	0.97	-1.23	0.000754	0.00802	-1.96	0.489	0.824	-1.13	0.277	0.926	-1.28	Fam189b	family with sequence similarity 189, member B [Source:MGI Symbol;Acc:MGI:1915771]
ENSMUSG00000107200	0.0272	0.386	2.84	0.743	0.998	1.13	0.0822	0.196	2.06	0.536	0.844	1.31	0.0506	0.917	-2.61	Gm43039	predicted gene 43039 [Source:MGI Symbol;Acc:MGI:5663176]
ENSMUSG00000018770	0.0273	0.386	-1.39	0.434	0.992	-1.11	0.0247	0.0863	-1.37	0.858	0.96	1.02	0.499	0.952	1.11	Atp5g3	ATP synthase, H+ transporting, mitochondrial F0 complex, subunit C3 (subunit 9) [Source:MGI Symbol;Acc:MGI:2442035]
ENSMUSG00000028849	0.0528	0.454	-1.36	0.734	0.998	-1.05	2.02e-05	0.0007	-1.96	0.793	0.941	1.04	0.997	1	-1	Map7d1	MAP7 domain containing 1 [Source:MGI Symbol;Acc:MGI:2384297]
ENSMUSG00000003810	0.0911	0.519	-1.28	0.0107	0.467	-1.4	6.23e-06	0.000294	-1.96	0.0079	0.157	-1.4	0.00132	0.281	-1.68	Mast2	microtubule associated serine/threonine kinase 2 [Source:MGI Symbol;Acc:MGI:894676]
ENSMUSG00000099583	0.0273	0.386	4	0.114	0.854	2.23	0.224	0.389	1.73	0.0659	0.388	2.7	0.223	0.918	2.2	Hist1h3d	histone cluster 1, H3d [Source:MGI Symbol;Acc:MGI:2448322]
ENSMUSG00000050323	0.0972	0.524	-1.42	0.96	0.998	-1.01	0.000804	0.00836	-1.96	0.0363	0.304	-1.46	0.342	0.938	-1.24	Ndufaf6	NADH dehydrogenase (ubiquinone) complex I, assembly factor 6 [Source:MGI Symbol;Acc:MGI:1924197]
ENSMUSG00000019787	0.177	0.613	-1.3	0.978	0.999	1	0.000443	0.00562	-1.96	0.459	0.806	-1.13	0.876	0.992	-1.03	Trdn	triadin [Source:MGI Symbol;Acc:MGI:1924007]
ENSMUSG00000042632	0.203	0.638	-1.3	0.742	0.998	-1.06	0.000596	0.00691	-1.96	0.975	0.994	-1.01	0.325	0.938	-1.25	Pla2g6	phospholipase A2, group VI [Source:MGI Symbol;Acc:MGI:1859152]
ENSMUSG00000021213	0.0276	0.389	3.66	0.829	0.998	1.12	0.0992	0.223	2.48	0.00783	0.157	4.97	0.987	0.999	1.01	Akr1c13	aldo-keto reductase family 1, member C13 [Source:MGI Symbol;Acc:MGI:1351662]
ENSMUSG00000036856	0.989	0.999	-1	0.0977	0.819	1.4	0.00137	0.0119	-1.96	0.684	0.902	-1.08	0.51	0.952	1.17	Wnt4	wingless-type MMTV integration site family, member 4 [Source:MGI Symbol;Acc:MGI:98957]
ENSMUSG00000025920	0.000406	0.112	-1.85	0.0717	0.768	-1.3	4.81e-05	0.00123	-1.95	0.116	0.486	-1.24	0.914	0.994	-1.02	Stau2	staufen (RNA binding protein) homolog 2 (Drosophila) [Source:MGI Symbol;Acc:MGI:1352508]
ENSMUSG00000030555	0.00757	0.273	-1.68	0.00757	0.408	-1.61	0.000396	0.00524	-1.95	0.433	0.792	-1.14	0.825	0.987	-1.05	Ttc23	tetratricopeptide repeat domain 23 [Source:MGI Symbol;Acc:MGI:1914259]
ENSMUSG00000096171	0.0278	0.389	-2.69	0.742	0.998	1.14	0.154	0.301	-1.78	0.157	0.551	1.74	0.193	0.918	2.1	Gm8055	predicted pseudogene 8055 [Source:MGI Symbol;Acc:MGI:3643695]
ENSMUSG00000045867	0.0113	0.314	-1.79	0.898	0.998	1.03	0.000882	0.00893	-1.95	0.537	0.844	-1.12	0.971	0.998	-1.01	Cradd	CASP2 and RIPK1 domain containing adaptor with death domain [Source:MGI Symbol;Acc:MGI:1336168]
ENSMUSG00000020770	0.0278	0.389	1.47	0.238	0.953	-1.2	0.0911	0.21	1.27	0.696	0.906	1.06	0.306	0.934	-1.21	Unk	unkempt homolog (Drosophila) [Source:MGI Symbol;Acc:MGI:2442456]
ENSMUSG00000041912	0.0278	0.389	1.9	0.0763	0.781	1.46	0.982	0.99	-1	0.305	0.701	1.25	0.123	0.917	-1.5	Tdrkh	tudor and KH domain containing protein [Source:MGI Symbol;Acc:MGI:1919884]
ENSMUSG00000064368	0.0472	0.444	-1.48	0.874	0.998	-1.03	0.000541	0.00646	-1.95	0.885	0.969	1.02	0.705	0.97	1.08	mt-Nd6	mitochondrially encoded NADH dehydrogenase 6 [Source:MGI Symbol;Acc:MGI:102495]
ENSMUSG00000056692	0.0532	0.454	-1.3	0.146	0.892	-1.19	2.46e-06	0.000156	-1.95	0.307	0.702	-1.13	0.256	0.923	-1.18	D17Wsu92e	DNA segment, Chr 17, Wayne State University 92, expressed [Source:MGI Symbol;Acc:MGI:106281]
ENSMUSG00000054708	0.0279	0.389	-1.65	0.259	0.963	-1.26	0.0513	0.142	-1.47	0.417	0.781	-1.16	0.565	0.955	-1.15	Ankrd24	ankyrin repeat domain 24 [Source:MGI Symbol;Acc:MGI:1890394]
ENSMUSG00000073139	0.0677	0.489	-1.36	0.276	0.968	-1.17	3.74e-05	0.00106	-1.95	0.0234	0.255	-1.38	0.947	0.996	1.01	BC023829	cDNA sequence BC023829 [Source:MGI Symbol;Acc:MGI:2448555]
ENSMUSG00000015605	0.0854	0.509	-1.34	0.123	0.863	-1.26	5.86e-05	0.0014	-1.95	0.212	0.615	-1.19	0.777	0.98	1.05	Srf	serum response factor [Source:MGI Symbol;Acc:MGI:106658]
ENSMUSG00000030695	0.0986	0.525	-1.38	0.23	0.951	-1.22	0.000439	0.00559	-1.95	0.679	0.9	-1.07	0.398	0.944	-1.19	Aldoa	aldolase A, fructose-bisphosphate [Source:MGI Symbol;Acc:MGI:87994]
ENSMUSG00000027099	0.028	0.389	-1.53	0.793	0.998	-1.04	0.986	0.992	-1	0.924	0.98	1.02	0.502	0.952	1.15	Mtx2	metaxin 2 [Source:MGI Symbol;Acc:MGI:1859652]
ENSMUSG00000034793	0.141	0.577	-1.3	0.665	0.998	1.07	5.56e-05	0.00134	-1.95	0.195	0.597	-1.2	0.927	0.995	-1.02	G6pc3	glucose 6 phosphatase, catalytic, 3 [Source:MGI Symbol;Acc:MGI:1915651]
ENSMUSG00000040264	0.028	0.389	19.1	0.824	0.998	-1.14	0.115	0.247	3.92	0.768	0.932	-1.5	0.765	0.979	2.05	Gbp2b	guanylate binding protein 2b [Source:MGI Symbol;Acc:MGI:95666]
ENSMUSG00000031388	0.0281	0.389	-1.85	0.343	0.99	-1.29	0.491	0.654	-1.18	0.723	0.916	-1.08	0.443	0.948	-1.26	Naa10	N(alpha)-acetyltransferase 10, NatA catalytic subunit [Source:MGI Symbol;Acc:MGI:1915255]
ENSMUSG00000034853	0.142	0.58	-1.31	0.0118	0.475	-1.52	6.72e-05	0.00153	-1.95	0.252	0.658	-1.21	0.114	0.917	-1.37	Acot11	acyl-CoA thioesterase 11 [Source:MGI Symbol;Acc:MGI:1913736]
ENSMUSG00000018334	0.421	0.784	-1.14	0.648	0.998	-1.07	4.95e-05	0.00125	-1.95	0.422	0.783	-1.12	0.261	0.924	-1.21	Ksr1	kinase suppressor of ras 1 [Source:MGI Symbol;Acc:MGI:105051]
ENSMUSG00000038024	0.481	0.817	-1.14	0.182	0.927	-1.24	0.000187	0.00314	-1.95	0.048	0.339	-1.36	0.711	0.971	-1.07	Dennd4c	DENN/MADD domain containing 4C [Source:MGI Symbol;Acc:MGI:1914769]
ENSMUSG00000022477	0.00628	0.264	-1.46	0.243	0.955	-1.15	2.32e-06	0.000151	-1.94	0.318	0.709	-1.12	0.283	0.928	-1.16	Aco2	aconitase 2, mitochondrial [Source:MGI Symbol;Acc:MGI:87880]
ENSMUSG00000070953	0.0282	0.39	-1.38	0.546	0.994	1.09	0.67	0.796	-1.06	0.427	0.787	1.11	0.703	0.97	-1.07	Rabepk	Rab9 effector protein with kelch motifs [Source:MGI Symbol;Acc:MGI:2139530]
ENSMUSG00000037855	0.0283	0.39	4.41	0.497	0.993	-1.47	0.259	0.43	1.8	0.273	0.673	1.72	0.987	0.999	1.01	Zfp365	zinc finger protein 365 [Source:MGI Symbol;Acc:MGI:2143676]
ENSMUSG00000029106	0.0284	0.39	1.26	0.414	0.992	1.08	0.0479	0.136	1.21	0.28	0.679	1.1	0.275	0.926	-1.13	Add1	adducin 1 (alpha) [Source:MGI Symbol;Acc:MGI:87918]
ENSMUSG00000083044	0.0285	0.39	-2.52	0.485	0.993	-1.27	0.455	0.623	1.34	0.91	0.975	1.04	0.756	0.979	-1.14	Gm12416	predicted gene 12416 [Source:MGI Symbol;Acc:MGI:3650588]
ENSMUSG00000019966	0.0285	0.39	-1.45	0.678	0.998	1.06	0.224	0.389	-1.2	0.00486	0.123	-1.53	0.918	0.994	1.02	Kitl	kit ligand [Source:MGI Symbol;Acc:MGI:96974]
ENSMUSG00000026568	0.0179	0.339	-1.6	0.544	0.994	1.11	0.000506	0.00617	-1.94	0.41	0.777	-1.14	0.758	0.979	-1.06	Mpc2	mitochondrial pyruvate carrier 2 [Source:MGI Symbol;Acc:MGI:1917706]
ENSMUSG00000014158	0.0285	0.39	1.91	0.0109	0.467	-1.82	0.41	0.583	1.2	0.584	0.867	1.13	0.341	0.938	-1.32	Trpv4	transient receptor potential cation channel, subfamily V, member 4 [Source:MGI Symbol;Acc:MGI:1926945]
ENSMUSG00000032601	0.0208	0.356	-1.42	0.168	0.921	-1.2	1.4e-05	0.000548	-1.94	0.127	0.505	-1.22	0.808	0.986	-1.04	Prkar2a	protein kinase, cAMP dependent regulatory, type II alpha [Source:MGI Symbol;Acc:MGI:108025]
ENSMUSG00000025911	0.933	0.986	1.02	0.267	0.967	1.22	0.189	0.347	-1.27	1.05e-05	0.00341	-2.41	0.0144	0.698	-1.73	Adhfe1	alcohol dehydrogenase, iron containing, 1 [Source:MGI Symbol;Acc:MGI:1923437]
ENSMUSG00000033065	0.27	0.694	-1.31	0.465	0.992	-1.17	0.00497	0.0282	-1.94	0.334	0.723	-1.22	0.423	0.946	-1.23	Pfkm	phosphofructokinase, muscle [Source:MGI Symbol;Acc:MGI:97548]
ENSMUSG00000034768	0.3	0.714	-1.19	0.311	0.985	-1.16	0.000116	0.00223	-1.94	0.00274	0.0952	-1.58	0.00611	0.53	-1.67	Asb16	ankyrin repeat and SOCS box-containing 16 [Source:MGI Symbol;Acc:MGI:2654437]
ENSMUSG00000099478	0.0287	0.39	-1.51	0.805	0.998	1.04	0.674	0.798	-1.07	0.322	0.712	1.18	0.872	0.991	1.04	Gm28370	predicted gene 28370 [Source:MGI Symbol;Acc:MGI:5579076]
ENSMUSG00000050310	0.39	0.766	-1.2	0.578	0.994	-1.11	0.000932	0.00926	-1.94	0.00122	0.0633	-1.87	0.589	0.955	1.14	Rictor	RPTOR independent companion of MTOR, complex 2 [Source:MGI Symbol;Acc:MGI:1926007]
ENSMUSG00000044477	0.00422	0.23	-1.61	0.0244	0.608	-1.38	5.07e-05	0.00126	-1.93	0.183	0.583	-1.2	0.799	0.984	-1.04	Zfand3	zinc finger, AN1-type domain 3 [Source:MGI Symbol;Acc:MGI:1096572]
ENSMUSG00000058835	0.0287	0.39	1.4	0.759	0.998	1.04	0.0127	0.0543	1.43	0.925	0.98	1.01	0.316	0.936	1.18	Abi1	abl-interactor 1 [Source:MGI Symbol;Acc:MGI:104913]
ENSMUSG00000102550	0.0287	0.39	3.71	0.55	0.994	-1.34	0.0272	0.0917	3.12	0.601	0.874	-1.27	0.308	0.934	1.88	Gm8276	predicted gene 8276 [Source:MGI Symbol;Acc:MGI:3648019]
ENSMUSG00000037341	0.0288	0.39	-2.04	0.694	0.998	1.11	0.111	0.242	-1.63	0.912	0.976	1.03	0.211	0.918	1.7	Slc9a7	solute carrier family 9 (sodium/hydrogen exchanger), member 7 [Source:MGI Symbol;Acc:MGI:2444530]
ENSMUSG00000102573	0.675	0.9	1.1	0.874	0.998	1.03	0.241	0.408	-1.28	9.43e-05	0.0149	-2.4	0.0328	0.861	-1.74	Gm7265	predicted gene 7265 [Source:MGI Symbol;Acc:MGI:3648991]
ENSMUSG00000021224	0.0288	0.39	1.38	0.00935	0.451	1.41	0.751	0.852	1.04	0.325	0.715	-1.12	0.486	0.95	-1.12	Numb	numb gene homolog (Drosophila) [Source:MGI Symbol;Acc:MGI:107423]
ENSMUSG00000057672	0.0288	0.39	1.41	0.18	0.926	1.21	0.031	0.1	1.35	0.282	0.681	1.15	0.946	0.996	-1.01	Pkn1	protein kinase N1 [Source:MGI Symbol;Acc:MGI:108022]
ENSMUSG00000026189	0.032	0.402	-1.79	0.638	0.997	-1.13	0.00544	0.03	-1.93	0.761	0.93	-1.07	0.842	0.988	1.06	Pecr	peroxisomal trans-2-enoyl-CoA reductase [Source:MGI Symbol;Acc:MGI:2148199]
ENSMUSG00000011148	0.0466	0.441	-1.48	0.801	0.998	1.04	0.000602	0.00697	-1.93	0.417	0.781	-1.14	0.296	0.933	-1.23	Adssl1	adenylosuccinate synthetase like 1 [Source:MGI Symbol;Acc:MGI:87947]
ENSMUSG00000057897	0.0625	0.477	-1.41	0.706	0.998	-1.06	0.000283	0.00416	-1.93	0.0238	0.257	1.43	0.255	0.923	1.25	Camk2b	calcium/calmodulin-dependent protein kinase II, beta [Source:MGI Symbol;Acc:MGI:88257]
ENSMUSG00000058444	0.0289	0.39	-1.45	0.697	0.998	1.06	0.0122	0.0527	-1.47	0.811	0.949	-1.03	0.421	0.946	1.16	Map2k5	mitogen-activated protein kinase kinase 5 [Source:MGI Symbol;Acc:MGI:1346345]
ENSMUSG00000048096	0.117	0.546	-1.44	0.112	0.85	-1.43	0.00569	0.0309	-1.93	0.238	0.644	-1.35	0.0302	0.857	-1.79	Lmod1	leiomodin 1 (smooth muscle) [Source:MGI Symbol;Acc:MGI:2135671]
ENSMUSG00000029392	0.307	0.718	-1.23	0.189	0.928	-1.27	0.00117	0.0107	-1.93	0.268	0.669	-1.22	0.164	0.918	-1.35	Rilpl1	Rab interacting lysosomal protein-like 1 [Source:MGI Symbol;Acc:MGI:1922945]
ENSMUSG00000027347	0.0289	0.39	3.95	0.924	0.998	-1.06	0.0253	0.0878	3.47	0.0795	0.418	2.72	0.377	0.941	1.9	Rasgrp1	RAS guanyl releasing protein 1 [Source:MGI Symbol;Acc:MGI:1314635]
ENSMUSG00000043099	0.029	0.39	-1.96	0.522	0.994	1.2	0.164	0.315	-1.46	0.976	0.994	-1.01	0.441	0.948	1.38	Hic1	hypermethylated in cancer 1 [Source:MGI Symbol;Acc:MGI:1338010]
ENSMUSG00000041695	0.029	0.39	-1.61	0.295	0.981	1.22	0.0684	0.174	-1.44	0.58	0.866	-1.11	0.611	0.956	1.12	Kcnj2	potassium inwardly-rectifying channel, subfamily J, member 2 [Source:MGI Symbol;Acc:MGI:104744]
ENSMUSG00000032204	0.029	0.39	3.58	0.0796	0.792	2.1	0.0834	0.198	2.17	0.0511	0.347	2.79	0.35	0.939	-1.69	Aqp9	aquaporin 9 [Source:MGI Symbol;Acc:MGI:1891066]
ENSMUSG00000074622	0.359	0.752	-1.29	0.00792	0.415	-1.96	0.0108	0.0489	-1.93	0.924	0.979	1.02	0.57	0.955	-1.17	Mafb	v-maf musculoaponeurotic fibrosarcoma oncogene family, protein B (avian) [Source:MGI Symbol;Acc:MGI:104555]
ENSMUSG00000014704	0.0292	0.392	-3.63	0.132	0.872	2.41	0.982	0.99	1.01	0.25	0.656	1.8	0.0777	0.917	-2.59	Hoxa2	homeobox A2 [Source:MGI Symbol;Acc:MGI:96174]
ENSMUSG00000037905	0.0292	0.392	1.63	0.949	0.998	-1.01	0.0871	0.204	1.38	0.0869	0.435	1.38	0.63	0.959	1.13	Bri3bp	Bri3 binding protein [Source:MGI Symbol;Acc:MGI:1924059]
ENSMUSG00000045106	0.758	0.932	-1.09	0.772	0.998	1.07	0.00369	0.0229	-1.93	0.307	0.702	-1.27	0.64	0.96	-1.14	Ccdc73	coiled-coil domain containing 73 [Source:MGI Symbol;Acc:MGI:3606488]
ENSMUSG00000087598	0.0293	0.392	1.6	0.912	0.998	-1.02	0.719	0.831	1.07	0.109	0.472	-1.34	0.523	0.953	1.18	Zfp111	zinc finger protein 111 [Source:MGI Symbol;Acc:MGI:1929114]
ENSMUSG00000036199	0.0294	0.392	-1.85	0.219	0.945	-1.35	0.0138	0.0577	-1.91	0.866	0.962	-1.04	0.474	0.949	1.23	Ndufa13	NADH dehydrogenase (ubiquinone) 1 alpha subcomplex, 13 [Source:MGI Symbol;Acc:MGI:1914434]
ENSMUSG00000025938	0.00171	0.188	-1.62	0.356	0.991	-1.13	1.15e-05	0.000473	-1.92	0.796	0.943	1.03	0.0899	0.917	1.31	Slco5a1	solute carrier organic anion transporter family, member 5A1 [Source:MGI Symbol;Acc:MGI:2443431]
ENSMUSG00000030256	0.00187	0.193	-1.97	0.549	0.994	-1.12	0.00135	0.0119	-1.92	0.891	0.97	1.02	0.688	0.968	-1.09	Bhlhe41	basic helix-loop-helix family, member e41 [Source:MGI Symbol;Acc:MGI:1930704]
ENSMUSG00000070305	0.00448	0.233	-2.14	0.0178	0.542	-1.79	0.00706	0.0361	-1.92	0.0489	0.341	-1.59	0.136	0.917	-1.51	Mpzl3	myelin protein zero-like 3 [Source:MGI Symbol;Acc:MGI:2442647]
ENSMUSG00000004837	0.0295	0.392	-1.7	0.744	0.998	1.08	0.627	0.765	-1.11	0.0656	0.387	-1.53	0.662	0.963	-1.13	Grap	GRB2-related adaptor protein [Source:MGI Symbol;Acc:MGI:1918770]
ENSMUSG00000025428	0.00991	0.295	-1.51	0.968	0.999	1.01	3.85e-05	0.00108	-1.92	0.16	0.556	-1.2	0.918	0.995	1.02	Atp5a1	ATP synthase, H+ transporting, mitochondrial F1 complex, alpha subunit 1 [Source:MGI Symbol;Acc:MGI:88115]
ENSMUSG00000021993	0.0163	0.338	-1.48	0.26	0.963	-1.17	3.84e-05	0.00107	-1.92	0.852	0.959	-1.03	0.358	0.94	-1.17	Mipep	mitochondrial intermediate peptidase [Source:MGI Symbol;Acc:MGI:1917728]
ENSMUSG00000002031	0.0296	0.392	-1.32	0.115	0.857	1.21	0.604	0.745	1.06	0.877	0.965	1.02	0.802	0.985	-1.04	Ift46	intraflagellar transport 46 [Source:MGI Symbol;Acc:MGI:1923818]
ENSMUSG00000032380	0.0238	0.371	-1.43	0.549	0.994	1.09	1.89e-05	0.000669	-1.92	0.00455	0.118	1.45	0.493	0.952	1.12	Dapk2	death-associated protein kinase 2 [Source:MGI Symbol;Acc:MGI:1341297]
ENSMUSG00000030986	0.0272	0.386	-1.37	0.105	0.831	-1.23	4.4e-06	0.00023	-1.92	0.325	0.715	-1.12	0.679	0.966	-1.06	Dhx32	DEAH (Asp-Glu-Ala-His) box polypeptide 32 [Source:MGI Symbol;Acc:MGI:2141813]
ENSMUSG00000040888	0.0297	0.392	-1.53	0.815	0.998	-1.04	0.0121	0.0526	-1.56	0.938	0.983	-1.01	0.351	0.94	-1.22	Gfer	growth factor, erv1 (S. cerevisiae)-like (augmenter of liver regeneration) [Source:MGI Symbol;Acc:MGI:107757]
ENSMUSG00000079104	0.0297	0.392	-1.37	0.994	1	1	0.0114	0.0505	-1.4	0.00228	0.0878	-1.47	0.579	0.955	1.1	Prps1l3	phosphoribosyl pyrophosphate synthetase 1-like 3 [Source:MGI Symbol;Acc:MGI:3779453]
ENSMUSG00000038777	0.0606	0.47	-1.51	0.803	0.998	-1.05	0.00144	0.0123	-1.92	0.298	0.695	1.21	0.498	0.952	-1.17	Sema6c	sema domain, transmembrane domain (TM), and cytoplasmic domain, (semaphorin) 6C [Source:MGI Symbol;Acc:MGI:1338032]
ENSMUSG00000105728	0.0297	0.392	4.04	0.456	0.992	1.57	0.0303	0.0988	3.47	0.948	0.987	-1.04	0.548	0.955	-1.46	Gm42819	predicted gene 42819 [Source:MGI Symbol;Acc:MGI:5662956]
ENSMUSG00000047141	0.0719	0.494	-1.47	0.749	0.998	1.06	0.00123	0.011	-1.92	0.0224	0.252	-1.53	0.866	0.99	1.04	Zfp654	zinc finger protein 654 [Source:MGI Symbol;Acc:MGI:1919270]
ENSMUSG00000017692	0.293	0.711	-1.22	0.000102	0.0696	-2.13	0.00034	0.00473	-1.92	0.0567	0.364	1.36	0.19	0.918	1.3	Rhbdl3	rhomboid, veinlet-like 3 (Drosophila) [Source:MGI Symbol;Acc:MGI:2179276]
ENSMUSG00000004945	0.397	0.771	-1.18	0.618	0.996	-1.09	0.00042	0.00544	-1.92	0.245	0.651	-1.21	0.464	0.948	1.17	Tmem242	transmembrane protein 242 [Source:MGI Symbol;Acc:MGI:1917794]
ENSMUSG00000044768	0.419	0.784	-1.18	0.71	0.998	-1.07	0.00139	0.0121	-1.92	0.379	0.759	-1.17	0.869	0.99	1.04	D1Ertd622e	DNA segment, Chr 1, ERATO Doi 622, expressed [Source:MGI Symbol;Acc:MGI:1277184]
ENSMUSG00000037280	0.0298	0.392	9.16	0.335	0.987	2.51	0.118	0.252	3.57	0.00124	0.0633	16.2	0.0929	0.917	7.24	Galnt6	UDP-N-acetyl-alpha-D-galactosamine:polypeptide N-acetylgalactosaminyltransferase 6 [Source:MGI Symbol;Acc:MGI:1891640]
ENSMUSG00000043190	0.0299	0.392	-1.63	0.0162	0.523	-1.56	0.0262	0.0898	-1.54	0.456	0.804	-1.14	0.431	0.946	1.2	Rfesd	Rieske (Fe-S) domain containing [Source:MGI Symbol;Acc:MGI:2145198]
ENSMUSG00000005981	0.00157	0.187	-1.43	0.0714	0.768	-1.19	3.32e-08	8.88e-06	-1.91	0.0104	0.178	-1.27	0.224	0.918	-1.15	Trap1	TNF receptor-associated protein 1 [Source:MGI Symbol;Acc:MGI:1915265]
ENSMUSG00000060913	0.00207	0.198	-1.66	0.854	0.998	-1.03	4.03e-05	0.00111	-1.91	0.4	0.772	-1.12	0.0396	0.91	-1.41	Trim55	tripartite motif-containing 55 [Source:MGI Symbol;Acc:MGI:3036269]
ENSMUSG00000033918	0.03	0.392	-1.5	0.236	0.953	1.22	0.263	0.433	-1.2	0.478	0.817	-1.12	0.321	0.936	1.23	Parl	presenilin associated, rhomboid-like [Source:MGI Symbol;Acc:MGI:1277152]
ENSMUSG00000030087	0.457	0.804	1.18	0.559	0.994	-1.12	0.299	0.472	-1.22	1.53e-05	0.00425	-2.38	0.000475	0.194	-2.3	Klf15	Kruppel-like factor 15 [Source:MGI Symbol;Acc:MGI:1929988]
ENSMUSG00000056091	0.0362	0.412	-1.49	0.0477	0.711	-1.39	0.000401	0.00527	-1.91	0.163	0.558	-1.25	0.278	0.926	-1.24	St3gal5	ST3 beta-galactoside alpha-2,3-sialyltransferase 5 [Source:MGI Symbol;Acc:MGI:1339963]
ENSMUSG00000022489	0.03	0.392	2.57	0.689	0.998	1.19	0.0134	0.0565	2.8	0.114	0.482	1.81	0.857	0.989	1.1	Pde1b	phosphodiesterase 1B, Ca2+-calmodulin dependent [Source:MGI Symbol;Acc:MGI:97523]
ENSMUSG00000031987	0.0424	0.428	-1.31	0.832	0.998	-1.02	3.02e-06	0.00018	-1.91	0.0155	0.215	-1.32	0.365	0.94	-1.13	Egln1	egl-9 family hypoxia-inducible factor 1 [Source:MGI Symbol;Acc:MGI:1932286]
ENSMUSG00000027649	0.0301	0.392	1.38	0.548	0.994	-1.08	0.178	0.334	1.19	0.797	0.943	1.03	0.477	0.949	1.12	Ctnnbl1	catenin, beta like 1 [Source:MGI Symbol;Acc:MGI:1913892]
ENSMUSG00000035642	0.1	0.526	-1.51	0.302	0.984	-1.25	0.00524	0.0292	-1.91	0.996	0.999	-1	0.231	0.918	1.38	Aamdc	adipogenesis associated Mth938 domain containing [Source:MGI Symbol;Acc:MGI:1913523]
ENSMUSG00000027845	0.0301	0.392	1.67	0.0073	0.407	-1.77	0.616	0.756	1.1	0.888	0.969	-1.03	0.999	1	-1	Dclre1b	DNA cross-link repair 1B, PSO2 homolog (S. cerevisiae) [Source:MGI Symbol;Acc:MGI:2156057]
ENSMUSG00000103567	0.0301	0.392	2.55	0.606	0.995	-1.2	0.988	0.994	1	0.589	0.869	1.2	0.563	0.955	1.29	Pcdhga5	protocadherin gamma subfamily A, 5 [Source:MGI Symbol;Acc:MGI:1935217]
ENSMUSG00000097337	0.0301	0.392	2.83	0.0332	0.648	2.49	0.914	0.952	1.04	0.311	0.703	1.53	0.63	0.959	-1.29	Gm26606	predicted gene, 26606 [Source:MGI Symbol;Acc:MGI:5477100]
ENSMUSG00000040560	0.18	0.617	-1.23	0.731	0.998	-1.05	2.98e-05	0.000929	-1.91	0.0286	0.276	-1.34	0.229	0.918	-1.22	Wdr7	WD repeat domain 7 [Source:MGI Symbol;Acc:MGI:1860197]
ENSMUSG00000041915	0.0302	0.393	1.54	0.925	0.998	-1.02	0.0467	0.134	1.4	0.609	0.877	1.09	0.787	0.982	-1.06	Ammecr1l	AMME chromosomal region gene 1-like [Source:MGI Symbol;Acc:MGI:2442711]
ENSMUSG00000020483	0.195	0.631	-1.26	0.575	0.994	-1.09	0.000355	0.00486	-1.91	0.97	0.992	-1.01	0.548	0.955	-1.12	Dynll2	dynein light chain LC8-type 2 [Source:MGI Symbol;Acc:MGI:1915347]
ENSMUSG00000028861	0.0303	0.393	-1.6	0.641	0.997	1.09	0.0394	0.118	-1.5	0.399	0.772	-1.16	0.621	0.957	1.12	Mrps15	mitochondrial ribosomal protein S15 [Source:MGI Symbol;Acc:MGI:1913657]
ENSMUSG00000078941	0.245	0.674	-1.35	0.289	0.977	-1.27	0.00317	0.0206	-1.91	0.0453	0.333	-1.48	0.629	0.959	1.14	Ak6	adenylate kinase 6 [Source:MGI Symbol;Acc:MGI:5510732]
ENSMUSG00000027257	0.261	0.686	-1.19	0.00399	0.332	-1.5	3.43e-05	0.001	-1.91	0.676	0.898	-1.06	0.619	0.957	-1.08	Pacsin3	protein kinase C and casein kinase substrate in neurons 3 [Source:MGI Symbol;Acc:MGI:1891410]
ENSMUSG00000009566	0.0303	0.393	1.52	0.877	0.998	-1.03	0.0952	0.217	1.32	0.0188	0.234	1.44	0.518	0.952	1.14	Fpgs	folylpolyglutamyl synthetase [Source:MGI Symbol;Acc:MGI:95576]
ENSMUSG00000024181	0.0304	0.393	-1.5	0.54	0.994	1.1	0.049	0.138	-1.4	0.602	0.874	1.08	0.349	0.939	1.21	Mrpl28	mitochondrial ribosomal protein L28 [Source:MGI Symbol;Acc:MGI:1915861]
ENSMUSG00000042066	0.386	0.762	-1.18	0.427	0.992	-1.14	0.00056	0.0066	-1.91	0.335	0.724	-1.17	0.157	0.918	-1.34	Tmcc2	transmembrane and coiled-coil domains 2 [Source:MGI Symbol;Acc:MGI:1916125]
ENSMUSG00000045875	0.654	0.891	-1.15	0.343	0.99	1.27	0.01	0.0463	-1.91	0.00247	0.0911	2	0.245	0.923	1.45	Adra1a	adrenergic receptor, alpha 1a [Source:MGI Symbol;Acc:MGI:104773]
ENSMUSG00000106317	0.0305	0.393	-2.24	0.737	0.998	-1.1	0.0632	0.165	-1.95	0.731	0.918	1.11	0.989	0.999	-1.01	Gm43848	predicted gene 43848 [Source:MGI Symbol;Acc:MGI:5663985]
ENSMUSG00000052962	0.0305	0.393	-1.45	0.375	0.991	1.14	0.0121	0.0526	-1.48	0.729	0.918	-1.05	0.617	0.957	1.09	Mrpl35	mitochondrial ribosomal protein L35 [Source:MGI Symbol;Acc:MGI:1913473]
ENSMUSG00000040265	0.374	0.76	-1.18	0.152	0.9	-1.26	0.423	0.595	-1.14	8.24e-06	0.00299	-2.37	0.00138	0.282	-2.04	Dnm3	dynamin 3 [Source:MGI Symbol;Acc:MGI:1341299]
ENSMUSG00000024811	0.013	0.328	-1.44	0.227	0.951	-1.16	9.95e-06	0.000422	-1.9	0.00723	0.151	-1.4	0.98	0.999	-1	Tnks2	tankyrase, TRF1-interacting ankyrin-related ADP-ribose polymerase 2 [Source:MGI Symbol;Acc:MGI:1921743]
ENSMUSG00000072640	0.0234	0.369	-1.39	0.585	0.994	1.07	4.82e-06	0.000247	-1.9	0.753	0.927	-1.04	0.956	0.997	1.01	Lyrm9	LYR motif containing 9 [Source:MGI Symbol;Acc:MGI:1913524]
ENSMUSG00000043252	0.0347	0.409	-1.53	0.112	0.85	-1.32	0.000894	0.00901	-1.9	0.00859	0.164	-1.57	0.663	0.963	-1.09	Tmem64	transmembrane protein 64 [Source:MGI Symbol;Acc:MGI:2140359]
ENSMUSG00000013419	0.129	0.56	-1.29	0.434	0.992	-1.12	0.000135	0.00247	-1.9	0.441	0.796	-1.12	0.701	0.969	-1.07	Zfp651	zinc finger protein 651 [Source:MGI Symbol;Acc:MGI:2670992]
ENSMUSG00000068697	0.134	0.567	-1.43	0.137	0.877	-1.37	0.00487	0.0278	-1.9	0.571	0.861	-1.12	0.537	0.955	-1.17	Myoz1	myozenin 1 [Source:MGI Symbol;Acc:MGI:1929471]
ENSMUSG00000026688	0.139	0.575	-1.38	0.82	0.998	1.04	0.00195	0.015	-1.9	0.0394	0.314	-1.48	0.203	0.918	-1.35	Mgst3	microsomal glutathione S-transferase 3 [Source:MGI Symbol;Acc:MGI:1913697]
ENSMUSG00000029632	0.0309	0.396	-1.82	0.788	0.998	-1.07	0.0342	0.108	-1.73	0.376	0.757	-1.23	0.224	0.918	1.41	Ndufa4	NADH dehydrogenase (ubiquinone) 1 alpha subcomplex, 4 [Source:MGI Symbol;Acc:MGI:107686]
ENSMUSG00000032523	0.208	0.644	-1.27	0.675	0.998	-1.07	0.000632	0.00717	-1.9	0.524	0.84	1.11	0.17	0.918	1.32	Hhatl	hedgehog acyltransferase-like [Source:MGI Symbol;Acc:MGI:1922020]
ENSMUSG00000057265	0.335	0.733	-1.29	0.263	0.964	1.31	0.00909	0.043	-1.9	0.182	0.581	-1.34	0.382	0.942	1.31	Ccdc176	coiled-coil domain containing 176 [Source:MGI Symbol;Acc:MGI:1920123]
ENSMUSG00000020716	0.031	0.397	1.33	0.34	0.99	1.11	0.759	0.858	-1.04	0.752	0.926	1.04	0.0829	0.917	1.28	Nf1	neurofibromatosis 1 [Source:MGI Symbol;Acc:MGI:97306]
ENSMUSG00000022861	0.031	0.396	2.87	0.93	0.998	1.03	0.278	0.449	-1.43	0.0291	0.278	-2.24	0.496	0.952	-1.34	Dgkg	diacylglycerol kinase, gamma [Source:MGI Symbol;Acc:MGI:105060]
ENSMUSG00000026895	0.00241	0.199	-1.69	0.866	0.998	-1.02	9.4e-05	0.0019	-1.89	0.293	0.692	-1.16	0.457	0.948	1.14	Ndufa8	NADH dehydrogenase (ubiquinone) 1 alpha subcomplex, 8 [Source:MGI Symbol;Acc:MGI:1915625]
ENSMUSG00000025280	0.0311	0.397	1.36	0.678	0.998	-1.05	0.285	0.456	-1.13	0.722	0.915	1.04	0.0154	0.718	-1.43	Polr3a	polymerase (RNA) III (DNA directed) polypeptide A [Source:MGI Symbol;Acc:MGI:2681836]
ENSMUSG00000032035	0.0312	0.397	-1.4	0.714	0.998	1.05	0.802	0.885	1.04	0.98	0.996	-1	0.36	0.94	1.17	Ets1	E26 avian leukemia oncogene 1, 5' domain [Source:MGI Symbol;Acc:MGI:95455]
ENSMUSG00000033632	0.0312	0.397	1.47	0.676	0.998	1.07	0.867	0.925	1.03	0.917	0.977	-1.02	0.261	0.924	-1.25	AW554918	expressed sequence AW554918 [Source:MGI Symbol;Acc:MGI:2147376]
ENSMUSG00000000088	0.00281	0.204	-1.8	0.283	0.974	-1.19	0.000553	0.00654	-1.89	0.508	0.833	-1.11	0.775	0.98	1.06	Cox5a	cytochrome c oxidase subunit Va [Source:MGI Symbol;Acc:MGI:88474]
ENSMUSG00000064367	0.0201	0.355	-1.53	0.564	0.994	1.1	0.000357	0.00487	-1.89	0.513	0.834	-1.1	0.946	0.996	1.01	mt-Nd5	mitochondrially encoded NADH dehydrogenase 5 [Source:MGI Symbol;Acc:MGI:102496]
ENSMUSG00000025545	0.0503	0.451	-1.62	0.321	0.986	1.24	0.00456	0.0265	-1.89	0.497	0.827	-1.14	0.455	0.948	1.23	Clybl	citrate lyase beta like [Source:MGI Symbol;Acc:MGI:1916884]
ENSMUSG00000024082	0.0313	0.398	-1.54	0.374	0.991	1.17	0.0845	0.2	-1.34	0.784	0.938	-1.04	0.64	0.96	-1.1	Ndufaf7	NADH dehydrogenase (ubiquinone) 1 alpha subcomplex assembly factor 7 [Source:MGI Symbol;Acc:MGI:1920944]
ENSMUSG00000009863	0.0314	0.398	-1.71	0.786	0.998	-1.06	0.0262	0.0898	-1.68	0.215	0.62	-1.3	0.229	0.918	1.36	Sdhb	succinate dehydrogenase complex, subunit B, iron sulfur (Ip) [Source:MGI Symbol;Acc:MGI:1914930]
ENSMUSG00000067869	0.0315	0.398	-3.41	0.332	0.987	-1.55	0.926	0.96	1.05	0.656	0.893	1.22	0.209	0.918	-1.9	Tcea1-ps1	transcription elongation factor A (SII) 1, pseudogene 1 [Source:MGI Symbol;Acc:MGI:1861432]
ENSMUSG00000028102	0.0315	0.398	-1.54	0.569	0.994	1.1	0.448	0.617	-1.13	0.803	0.947	-1.04	0.643	0.96	-1.1	Pex11b	peroxisomal biogenesis factor 11 beta [Source:MGI Symbol;Acc:MGI:1338882]
ENSMUSG00000036810	0.0315	0.398	-1.42	0.467	0.992	1.11	0.0331	0.105	-1.38	0.641	0.888	-1.07	0.653	0.962	1.08	Cnep1r1	CTD nuclear envelope phosphatase 1 regulatory subunit 1 [Source:MGI Symbol;Acc:MGI:1921981]
ENSMUSG00000013629	0.0315	0.398	1.52	0.981	0.999	1	0.214	0.377	1.22	0.383	0.761	1.15	0.83	0.987	-1.04	Cad	carbamoyl-phosphate synthetase 2, aspartate transcarbamylase, and dihydroorotase [Source:MGI Symbol;Acc:MGI:1916969]
ENSMUSG00000002808	0.0837	0.507	-1.44	0.944	0.998	1.01	0.00185	0.0145	-1.89	0.47	0.812	-1.14	0.681	0.966	-1.09	Epdr1	ependymin related protein 1 (zebrafish) [Source:MGI Symbol;Acc:MGI:2145369]
ENSMUSG00000023274	0.0316	0.398	-3.95	0.471	0.992	-1.53	0.575	0.724	1.34	0.0163	0.22	3.81	0.493	0.952	1.66	Cd4	CD4 antigen [Source:MGI Symbol;Acc:MGI:88335]
ENSMUSG00000039395	0.11	0.539	-1.4	0.132	0.872	-1.32	0.00146	0.0125	-1.89	0.0416	0.32	-1.44	0.226	0.918	-1.3	Mreg	melanoregulin [Source:MGI Symbol;Acc:MGI:2151839]
ENSMUSG00000022551	0.118	0.546	-1.27	0.975	0.999	1	4.72e-05	0.00122	-1.89	0.238	0.645	-1.17	0.837	0.987	1.03	Cyc1	cytochrome c-1 [Source:MGI Symbol;Acc:MGI:1913695]
ENSMUSG00000044177	0.159	0.595	1.4	0.871	0.998	1.03	0.233	0.399	1.26	0.000149	0.0191	-2.34	0.00627	0.535	-2.09	Wfikkn2	WAP, follistatin/kazal, immunoglobulin, kunitz and netrin domain containing 2 [Source:MGI Symbol;Acc:MGI:2669209]
ENSMUSG00000052430	0.0102	0.301	-1.86	0.00527	0.371	-1.87	0.0142	0.0586	-1.67	0.000281	0.027	-2.33	0.232	0.918	-1.37	Bmpr1b	bone morphogenetic protein receptor, type 1B [Source:MGI Symbol;Acc:MGI:107191]
ENSMUSG00000033209	0.204	0.64	-1.27	0.057	0.736	-1.38	0.000416	0.0054	-1.89	0.0425	0.324	-1.38	0.109	0.917	-1.37	Ttc28	tetratricopeptide repeat domain 28 [Source:MGI Symbol;Acc:MGI:2140873]
ENSMUSG00000020811	0.0321	0.402	-1.63	0.509	0.994	1.17	0.328	0.504	-1.22	0.265	0.667	-1.24	0.337	0.938	-1.29	Wscd1	WSC domain containing 1 [Source:MGI Symbol;Acc:MGI:2448493]
ENSMUSG00000074093	0.226	0.66	-1.29	0.612	0.995	1.1	0.00153	0.0128	-1.89	0.191	0.591	-1.26	0.498	0.952	-1.16	Svip	small VCP/p97-interacting protein [Source:MGI Symbol;Acc:MGI:1922994]
ENSMUSG00000049119	0.331	0.731	-1.26	0.877	0.998	1.04	0.00328	0.0211	-1.89	0.097	0.455	-1.42	0.194	0.918	-1.44	Fam110b	family with sequence similarity 110, member B [Source:MGI Symbol;Acc:MGI:1916593]
ENSMUSG00000033900	0.41	0.778	-1.2	0.376	0.991	-1.18	0.00105	0.01	-1.89	0.00251	0.0916	-1.75	0.256	0.924	-1.31	Map9	microtubule-associated protein 9 [Source:MGI Symbol;Acc:MGI:2442208]
ENSMUSG00000014361	0.0322	0.403	2.03	0.978	0.999	-1.01	0.0149	0.0606	2.09	0.612	0.877	1.15	0.887	0.992	-1.05	Mertk	c-mer proto-oncogene tyrosine kinase [Source:MGI Symbol;Acc:MGI:96965]
ENSMUSG00000038046	0.477	0.814	-1.21	0.191	0.93	-1.33	0.00523	0.0292	-1.89	0.39	0.767	-1.19	0.934	0.995	1.02	Rnmtl1	RNA methyltransferase like 1 [Source:MGI Symbol;Acc:MGI:1914640]
ENSMUSG00000040370	0.0323	0.403	-1.58	0.268	0.967	1.23	0.4	0.575	-1.17	0.902	0.973	1.02	0.939	0.996	1.02	Lyrm5	LYR motif containing 5 [Source:MGI Symbol;Acc:MGI:1914886]
ENSMUSG00000021061	0.511	0.831	-1.15	0.56	0.994	-1.11	0.00212	0.0156	-1.89	0.537	0.844	-1.12	0.165	0.918	-1.36	Sptb	spectrin beta, erythrocytic [Source:MGI Symbol;Acc:MGI:98387]
ENSMUSG00000009487	0.0324	0.403	-2.71	0.178	0.926	-1.75	0.0311	0.101	-2.04	0.00462	0.12	2.4	0.157	0.918	1.85	Otog	otogelin [Source:MGI Symbol;Acc:MGI:1202064]
ENSMUSG00000033576	0.0324	0.403	-1.55	0.0632	0.752	-1.4	0.129	0.266	-1.32	0.9	0.973	1.02	0.128	0.917	-1.39	Apol6	apolipoprotein L 6 [Source:MGI Symbol;Acc:MGI:1919189]
ENSMUSG00000021892	0.0324	0.403	1.33	0.0856	0.808	1.23	0.363	0.539	1.11	0.611	0.877	-1.06	0.454	0.948	-1.11	Sh3bp5	SH3-domain binding protein 5 (BTK-associated) [Source:MGI Symbol;Acc:MGI:1344391]
ENSMUSG00000003518	0.000353	0.109	-1.51	0.957	0.998	-1.01	7.14e-08	1.43e-05	-1.88	0.148	0.538	-1.14	0.832	0.987	-1.02	Dusp3	dual specificity phosphatase 3 (vaccinia virus phosphatase VH1-related) [Source:MGI Symbol;Acc:MGI:1919599]
ENSMUSG00000026579	0.0324	0.403	2.85	0.795	0.998	-1.11	0.114	0.246	1.85	0.663	0.895	-1.22	0.378	0.941	1.76	F5	coagulation factor V [Source:MGI Symbol;Acc:MGI:88382]
ENSMUSG00000032786	0.000373	0.11	-2.02	0.301	0.984	-1.18	0.000522	0.00631	-1.88	0.99	0.998	-1	0.87	0.99	1.03	Alas1	aminolevulinic acid synthase 1 [Source:MGI Symbol;Acc:MGI:87989]
ENSMUSG00000020021	0.0325	0.403	1.57	0.0808	0.798	1.39	0.064	0.166	1.38	0.222	0.629	-1.24	0.281	0.926	-1.29	Fgd6	FYVE, RhoGEF and PH domain containing 6 [Source:MGI Symbol;Acc:MGI:1261419]
ENSMUSG00000015337	0.0118	0.314	-1.85	0.39	0.991	1.21	0.00309	0.0202	-1.88	0.345	0.734	-1.2	0.838	0.987	1.06	Endog	endonuclease G [Source:MGI Symbol;Acc:MGI:1261433]
ENSMUSG00000023075	0.0141	0.329	-1.66	0.0818	0.801	-1.37	0.00104	0.01	-1.88	0.275	0.676	-1.21	0.845	0.988	-1.04	Akirin1	akirin 1 [Source:MGI Symbol;Acc:MGI:1915300]
ENSMUSG00000025968	0.0175	0.339	-1.47	0.944	0.998	-1.01	7.39e-05	0.00162	-1.88	0.369	0.753	-1.13	0.544	0.955	-1.11	Ndufs1	NADH dehydrogenase (ubiquinone) Fe-S protein 1 [Source:MGI Symbol;Acc:MGI:2443241]
ENSMUSG00000025582	0.0326	0.404	4.47	0.904	0.998	1.08	0.0751	0.185	2.88	0.0217	0.249	4.1	0.187	0.918	2.78	Nptx1	neuronal pentraxin 1 [Source:MGI Symbol;Acc:MGI:107811]
ENSMUSG00000027163	0.0327	0.404	-1.58	0.561	0.994	1.12	0.0492	0.139	-1.45	0.766	0.931	1.05	0.852	0.988	1.04	Commd9	COMM domain containing 9 [Source:MGI Symbol;Acc:MGI:1923751]
ENSMUSG00000006057	0.0206	0.356	-1.71	0.564	0.994	1.12	0.00347	0.0219	-1.88	0.335	0.724	-1.2	0.21	0.918	1.36	Atp5g1	ATP synthase, H+ transporting, mitochondrial F0 complex, subunit C1 (subunit 9) [Source:MGI Symbol;Acc:MGI:107653]
ENSMUSG00000044700	0.021	0.356	-1.44	0.213	0.942	-1.19	4.16e-05	0.00113	-1.88	0.696	0.906	-1.05	0.152	0.918	-1.27	Tmem201	transmembrane protein 201 [Source:MGI Symbol;Acc:MGI:1196277]
ENSMUSG00000004364	0.0239	0.371	-1.38	0.22	0.947	-1.16	9.12e-06	0.000394	-1.88	0.0845	0.43	-1.23	0.315	0.936	-1.16	Cul3	cullin 3 [Source:MGI Symbol;Acc:MGI:1347360]
ENSMUSG00000005413	0.0328	0.404	2.01	0.866	0.998	-1.05	0.0155	0.0624	2.05	0.1	0.461	1.59	0.117	0.917	1.84	Hmox1	heme oxygenase 1 [Source:MGI Symbol;Acc:MGI:96163]
ENSMUSG00000102459	0.0329	0.405	3.55	0.604	0.995	1.3	0.275	0.447	-1.8	0.457	0.805	-1.38	0.491	0.951	-1.45	Gm38352	predicted gene, 38352 [Source:MGI Symbol;Acc:MGI:5611580]
ENSMUSG00000079625	0.0329	0.405	8.33	0.725	0.998	1.42	0.159	0.309	4.02	0.0332	0.294	6.7	0.28	0.926	3.51	Tm4sf19	transmembrane 4 L six family member 19 [Source:MGI Symbol;Acc:MGI:3645933]
ENSMUSG00000061518	0.0443	0.433	-1.46	0.738	0.998	-1.06	0.000436	0.00557	-1.88	0.372	0.755	-1.15	0.553	0.955	1.12	Cox5b	cytochrome c oxidase subunit Vb [Source:MGI Symbol;Acc:MGI:88475]
ENSMUSG00000036278	0.0445	0.434	-1.63	0.744	0.998	-1.07	0.00587	0.0316	-1.88	0.81	0.949	1.05	0.883	0.992	-1.04	Macrod1	MACRO domain containing 1 [Source:MGI Symbol;Acc:MGI:2147583]
ENSMUSG00000027201	0.0331	0.406	1.89	0.277	0.969	1.31	0.397	0.572	1.21	0.176	0.573	1.38	0.657	0.963	1.16	Myef2	myelin basic protein expression factor 2, repressor [Source:MGI Symbol;Acc:MGI:104592]
ENSMUSG00000034290	0.0696	0.491	-1.26	0.257	0.963	-1.13	1.69e-06	0.000123	-1.88	0.00487	0.123	-1.37	0.0309	0.857	-1.34	Nek9	NIMA (never in mitosis gene a)-related expressed kinase 9 [Source:MGI Symbol;Acc:MGI:2387995]
ENSMUSG00000032527	0.0728	0.494	-1.38	0.971	0.999	-1.01	0.000234	0.00367	-1.88	0.0365	0.305	-1.37	0.699	0.969	1.08	Pccb	propionyl Coenzyme A carboxylase, beta polypeptide [Source:MGI Symbol;Acc:MGI:1914154]
ENSMUSG00000020925	0.266	0.691	-1.21	0.114	0.854	-1.28	0.000236	0.00368	-1.88	0.0606	0.375	-1.32	0.325	0.938	-1.2	Ccdc43	coiled-coil domain containing 43 [Source:MGI Symbol;Acc:MGI:1289318]
ENSMUSG00000045211	0.308	0.719	-1.21	0.275	0.968	-1.19	0.000105	0.00206	-1.88	0.647	0.89	-1.07	0.157	0.918	-1.3	Nudt18	nudix (nucleoside diphosphate linked moiety X)-type motif 18 [Source:MGI Symbol;Acc:MGI:2385853]
ENSMUSG00000079020	0.309	0.72	-1.24	0.0828	0.802	-1.38	0.00179	0.0142	-1.88	0.00179	0.0764	-1.82	0.000571	0.202	-2.31	Slc45a4	solute carrier family 45, member 4 [Source:MGI Symbol;Acc:MGI:2146236]
ENSMUSG00000030095	0.0333	0.406	1.43	0.332	0.987	-1.15	0.00874	0.0419	1.5	0.0276	0.273	1.37	0.328	0.938	1.19	Tmem43	transmembrane protein 43 [Source:MGI Symbol;Acc:MGI:1921372]
ENSMUSG00000044795	0.373	0.76	-1.27	0.813	0.998	1.06	0.00658	0.0344	-1.88	0.361	0.747	-1.21	0.108	0.917	-1.57	Cyb5d1	cytochrome b5 domain containing 1 [Source:MGI Symbol;Acc:MGI:2685586]
ENSMUSG00000017679	0.0333	0.406	1.5	0.394	0.992	-1.15	0.0525	0.145	1.37	0.649	0.891	1.07	0.762	0.979	-1.06	Ttpal	tocopherol (alpha) transfer protein-like [Source:MGI Symbol;Acc:MGI:1923330]
ENSMUSG00000063142	0.478	0.815	-1.15	0.278	0.97	-1.2	0.000712	0.00771	-1.88	0.00351	0.105	-1.66	0.303	0.934	-1.24	Kcnma1	potassium large conductance calcium-activated channel, subfamily M, alpha member 1 [Source:MGI Symbol;Acc:MGI:99923]
ENSMUSG00000082962	0.0333	0.406	2.7	0.77	0.998	-1.14	0.264	0.435	-1.48	0.663	0.895	1.21	0.995	1	-1	Gm10601	predicted pseudogene 10601 [Source:MGI Symbol;Acc:MGI:3708690]
ENSMUSG00000030246	0.000485	0.119	-1.87	0.692	0.998	-1.06	0.000181	0.00305	-1.87	0.278	0.678	-1.17	0.714	0.971	1.07	Ldhb	lactate dehydrogenase B [Source:MGI Symbol;Acc:MGI:96763]
ENSMUSG00000024413	0.877	0.97	-1.04	0.39	0.991	-1.22	0.00379	0.0233	-2.05	0.00033	0.031	-2.33	0.00134	0.281	-2.51	Npc1	Niemann-Pick type C1 [Source:MGI Symbol;Acc:MGI:1097712]
ENSMUSG00000058392	0.0334	0.406	1.49	0.182	0.927	-1.24	0.527	0.684	1.1	0.198	0.599	1.21	0.756	0.979	-1.06	Rrp1b	ribosomal RNA processing 1 homolog B (S. cerevisiae) [Source:MGI Symbol;Acc:MGI:1919712]
ENSMUSG00000026932	0.00276	0.204	-1.58	0.427	0.992	-1.11	1.99e-05	0.000695	-1.87	0.53	0.842	-1.08	0.547	0.955	-1.1	Nacc2	nucleus accumbens associated 2, BEN and BTB (POZ) domain containing [Source:MGI Symbol;Acc:MGI:1915241]
ENSMUSG00000021427	0.0337	0.409	1.3	0.999	1	-1	0.053	0.146	1.25	0.119	0.492	1.18	0.82	0.987	-1.03	Ssr1	signal sequence receptor, alpha [Source:MGI Symbol;Acc:MGI:105082]
ENSMUSG00000078716	0.00483	0.241	-1.78	0.462	0.992	-1.13	0.000712	0.00771	-1.87	0.887	0.969	1.02	0.612	0.956	-1.11	Tmem8b	transmembrane protein 8B [Source:MGI Symbol;Acc:MGI:2441680]
ENSMUSG00000032306	0.0118	0.314	-1.53	0.501	0.994	1.1	0.000115	0.00221	-1.87	0.0179	0.229	1.4	0.771	0.98	-1.05	Mpi	mannose phosphate isomerase [Source:MGI Symbol;Acc:MGI:97075]
ENSMUSG00000064341	0.0128	0.326	-1.69	0.951	0.998	-1.01	0.00174	0.0139	-1.87	0.831	0.954	1.04	0.693	0.968	-1.09	mt-Nd1	mitochondrially encoded NADH dehydrogenase 1 [Source:MGI Symbol;Acc:MGI:101787]
ENSMUSG00000010911	0.0199	0.352	-1.85	0.367	0.991	1.25	0.00853	0.0412	-1.87	0.399	0.772	-1.19	0.865	0.99	1.05	Apip	APAF1 interacting protein [Source:MGI Symbol;Acc:MGI:1926788]
ENSMUSG00000034566	0.0323	0.403	-1.71	0.402	0.992	1.2	0.00797	0.0392	-1.87	0.651	0.891	-1.1	0.571	0.955	1.16	Atp5h	ATP synthase, H+ transporting, mitochondrial F0 complex, subunit D [Source:MGI Symbol;Acc:MGI:1918929]
ENSMUSG00000007783	0.0339	0.409	1.84	0.512	0.994	-1.19	0.062	0.163	1.51	0.546	0.848	1.14	0.449	0.948	-1.25	Cpt1c	carnitine palmitoyltransferase 1c [Source:MGI Symbol;Acc:MGI:2446526]
ENSMUSG00000068551	0.0358	0.41	-1.56	0.328	0.987	-1.2	0.00159	0.0131	-1.87	0.73	0.918	-1.06	0.896	0.994	1.03	Zfp467	zinc finger protein 467 [Source:MGI Symbol;Acc:MGI:1916160]
ENSMUSG00000040713	0.0365	0.412	-1.4	0.00112	0.189	-1.6	6.39e-05	0.00148	-1.87	0.347	0.736	-1.13	0.129	0.917	-1.29	Creg1	cellular repressor of E1A-stimulated genes 1 [Source:MGI Symbol;Acc:MGI:1344382]
ENSMUSG00000051000	0.0365	0.412	-1.33	0.59	0.994	1.06	5.27e-06	0.000262	-1.87	0.43	0.789	1.09	0.851	0.988	-1.03	Fam160a1	family with sequence similarity 160, member A1 [Source:MGI Symbol;Acc:MGI:2444746]
ENSMUSG00000043183	0.034	0.409	1.56	0.0759	0.778	1.42	0.122	0.257	1.32	0.201	0.603	1.25	0.0564	0.917	1.61	Simc1	SUMO-interacting motifs containing 1 [Source:MGI Symbol;Acc:MGI:2442599]
ENSMUSG00000006315	0.0341	0.409	-1.78	0.754	0.998	1.08	0.0256	0.0883	-1.74	0.124	0.5	-1.41	0.253	0.923	1.4	Tmem147	transmembrane protein 147 [Source:MGI Symbol;Acc:MGI:1915011]
ENSMUSG00000064128	0.0341	0.409	1.46	0.857	0.998	1.03	0.0447	0.129	1.34	0.176	0.572	1.23	0.434	0.946	1.17	Cenpj	centromere protein J [Source:MGI Symbol;Acc:MGI:2684927]
ENSMUSG00000011752	0.0341	0.409	2.18	0.169	0.922	-1.59	0.0297	0.0974	1.96	0.291	0.69	1.38	0.824	0.987	1.09	Pgam1	phosphoglycerate mutase 1 [Source:MGI Symbol;Acc:MGI:97552]
ENSMUSG00000106988	0.0341	0.409	4.04	0.0452	0.708	3.05	0.191	0.349	-2.01	0.433	0.792	-1.47	0.155	0.918	2.98	Tsg101-ps	tumor susceptibility gene 101, pseudogene [Source:MGI Symbol;Acc:MGI:1335078]
ENSMUSG00000029128	0.0414	0.424	-1.36	0.442	0.992	-1.11	2.4e-05	0.000796	-1.87	0.194	0.595	-1.18	0.374	0.94	-1.15	Rab28	RAB28, member RAS oncogene family [Source:MGI Symbol;Acc:MGI:1917285]
ENSMUSG00000084384	0.0342	0.409	-2.25	0.955	0.998	1.02	0.77	0.865	-1.11	0.842	0.957	-1.06	0.141	0.917	2.09	Gm12251	predicted gene 12251 [Source:MGI Symbol;Acc:MGI:3652216]
ENSMUSG00000046157	0.0342	0.409	1.86	0.0945	0.814	1.56	0.0197	0.0737	1.88	0.0443	0.33	1.66	0.23	0.918	1.51	Tmem229b	transmembrane protein 229B [Source:MGI Symbol;Acc:MGI:2444389]
ENSMUSG00000032370	0.0477	0.445	-1.43	0.744	0.998	1.05	0.000252	0.00382	-1.87	0.249	0.655	-1.19	0.253	0.923	-1.24	Lactb	lactamase, beta [Source:MGI Symbol;Acc:MGI:1933395]
ENSMUSG00000086534	0.0343	0.409	-4.5	0.0559	0.734	2.92	0.0363	0.112	-3.4	0.0386	0.312	2.29	0.635	0.96	1.31	Gm16758	predicted gene, 16758 [Source:MGI Symbol;Acc:MGI:4439682]
ENSMUSG00000050856	0.0343	0.409	-2.35	0.956	0.998	1.02	0.186	0.344	-1.63	0.703	0.909	-1.14	0.136	0.917	1.89	Atp5k	ATP synthase, H+ transporting, mitochondrial F1F0 complex, subunit E [Source:MGI Symbol;Acc:MGI:106636]
ENSMUSG00000020268	0.0787	0.499	-1.38	0.641	0.997	-1.08	0.000211	0.00343	-1.87	0.282	0.68	1.18	0.978	0.999	1.01	Lyrm7	LYR motif containing 7 [Source:MGI Symbol;Acc:MGI:1922780]
ENSMUSG00000028838	0.0953	0.522	-1.3	0.329	0.987	-1.14	3.23e-05	0.000969	-1.87	0.939	0.984	-1.01	0.599	0.956	-1.09	Extl1	exostoses (multiple)-like 1 [Source:MGI Symbol;Acc:MGI:1888742]
ENSMUSG00000033377	0.0344	0.409	-1.45	0.94	0.998	-1.01	0.123	0.258	-1.27	0.0411	0.319	-1.37	0.979	0.999	1.01	Palmd	palmdelphin [Source:MGI Symbol;Acc:MGI:2148896]
ENSMUSG00000066319	0.0345	0.409	-3.57	0.742	0.998	1.19	0.606	0.747	1.33	0.943	0.985	1.04	0.945	0.996	-1.05	Rtp3	receptor transporter protein 3 [Source:MGI Symbol;Acc:MGI:2446841]
ENSMUSG00000048807	0.683	0.903	1.1	0.469	0.992	-1.16	0.00241	0.0171	-1.87	0.465	0.809	1.14	0.524	0.953	-1.16	Slc35e4	solute carrier family 35, member E4 [Source:MGI Symbol;Acc:MGI:2144150]
ENSMUSG00000032415	0.955	0.991	-1.02	0.767	0.998	-1.07	0.004	0.0242	-1.87	0.18	0.579	1.32	0.947	0.996	1.02	Ube2cbp	ubiquitin-conjugating enzyme E2C binding protein [Source:MGI Symbol;Acc:MGI:1917598]
ENSMUSG00000020061	0.0345	0.409	-1.35	0.0168	0.526	1.35	0.0934	0.214	-1.25	0.0378	0.309	1.28	0.392	0.944	1.13	Mybpc1	myosin binding protein C, slow-type [Source:MGI Symbol;Acc:MGI:1336213]
ENSMUSG00000020319	0.0345	0.409	1.71	0.341	0.99	1.21	0.161	0.312	1.32	0.928	0.981	1.02	0.371	0.94	1.25	Wdpcp	WD repeat containing planar cell polarity effector [Source:MGI Symbol;Acc:MGI:2144467]
ENSMUSG00000071528	0.0346	0.409	-2.84	0.701	0.998	1.18	0.0938	0.214	-2.06	0.353	0.74	-1.45	0.17	0.918	2.38	Usmg5	upregulated during skeletal muscle growth 5 [Source:MGI Symbol;Acc:MGI:1891435]
ENSMUSG00000035614	0.0346	0.409	-1.55	0.713	0.998	-1.07	0.0419	0.124	-1.47	0.246	0.652	-1.23	0.695	0.968	1.1	Fam179b	family with sequence similarity 179, member B [Source:MGI Symbol;Acc:MGI:2684313]
ENSMUSG00000024533	0.0346	0.409	1.5	0.727	0.998	1.06	0.0981	0.221	1.32	0.781	0.936	1.04	0.529	0.955	-1.14	Spire1	spire homolog 1 (Drosophila) [Source:MGI Symbol;Acc:MGI:1915416]
ENSMUSG00000031059	0.0347	0.409	-1.73	0.671	0.998	1.1	0.0316	0.102	-1.68	0.62	0.88	-1.11	0.323	0.937	1.3	Ndufb11	NADH dehydrogenase (ubiquinone) 1 beta subcomplex, 11 [Source:MGI Symbol;Acc:MGI:1349919]
ENSMUSG00000025147	0.0347	0.409	-1.6	0.593	0.995	1.11	0.023	0.0822	-1.59	0.959	0.99	1.01	0.965	0.998	1.01	Mob2	MOB kinase activator 2 [Source:MGI Symbol;Acc:MGI:1919891]
ENSMUSG00000033352	0.000744	0.147	-1.49	0.609	0.995	-1.05	2.33e-07	3.29e-05	-1.86	0.813	0.949	-1.02	0.209	0.918	-1.16	Map2k4	mitogen-activated protein kinase kinase 4 [Source:MGI Symbol;Acc:MGI:1346869]
ENSMUSG00000037965	0.0347	0.409	1.3	0.319	0.986	1.11	0.0143	0.0592	1.32	0.0195	0.239	1.28	0.062	0.917	1.29	Zc3h7a	zinc finger CCCH type containing 7 A [Source:MGI Symbol;Acc:MGI:2445044]
ENSMUSG00000053297	0.0348	0.409	-1.81	0.46	0.992	1.2	0.929	0.961	-1.02	0.278	0.678	-1.37	0.0851	0.917	-1.93	AI854703	expressed sequence AI854703 [Source:MGI Symbol;Acc:MGI:2141510]
ENSMUSG00000063576	0.00164	0.188	-1.75	0.494	0.993	-1.11	0.000228	0.00362	-1.86	0.312	0.704	1.16	0.566	0.955	1.11	Klhdc3	kelch domain containing 3 [Source:MGI Symbol;Acc:MGI:2651568]
ENSMUSG00000006717	0.0349	0.409	-2.03	0.531	0.994	1.2	0.0706	0.177	-1.72	0.381	0.76	-1.28	0.244	0.922	1.59	Acot13	acyl-CoA thioesterase 13 [Source:MGI Symbol;Acc:MGI:1914084]
ENSMUSG00000020657	0.00442	0.232	-1.44	0.747	0.998	-1.04	1.24e-06	9.71e-05	-1.86	0.00755	0.154	-1.33	0.00492	0.464	-1.46	Dnajc27	DnaJ (Hsp40) homolog, subfamily C, member 27 [Source:MGI Symbol;Acc:MGI:2443036]
ENSMUSG00000064254	0.00639	0.265	-2.15	0.474	0.992	-1.19	0.0105	0.048	-1.86	0.42	0.782	-1.2	0.55	0.955	1.21	Ethe1	ethylmalonic encephalopathy 1 [Source:MGI Symbol;Acc:MGI:1913321]
ENSMUSG00000031751	0.0106	0.304	-1.35	0.0495	0.714	-1.22	2.67e-07	3.67e-05	-1.86	0.326	0.716	-1.1	0.269	0.925	-1.14	Amfr	autocrine motility factor receptor [Source:MGI Symbol;Acc:MGI:1345634]
ENSMUSG00000058258	0.035	0.409	-2.75	0.603	0.995	1.25	0.632	0.767	1.23	0.166	0.562	-1.78	0.939	0.996	-1.04	Idi1	isopentenyl-diphosphate delta isomerase [Source:MGI Symbol;Acc:MGI:2442264]
ENSMUSG00000021930	0.035	0.409	-1.88	0.368	0.991	-1.26	0.054	0.148	-1.73	0.168	0.564	-1.41	0.433	0.946	-1.28	Spryd7	SPRY domain containing 7 [Source:MGI Symbol;Acc:MGI:1913924]
ENSMUSG00000030098	0.0154	0.335	-1.85	0.387	0.991	-1.23	0.00919	0.0433	-1.86	0.0735	0.404	1.5	0.17	0.918	1.54	Grip2	glutamate receptor interacting protein 2 [Source:MGI Symbol;Acc:MGI:2681173]
ENSMUSG00000026820	0.0169	0.339	-1.53	0.773	0.998	1.05	0.000178	0.00303	-1.86	0.458	0.806	-1.11	0.725	0.974	1.07	Ptges2	prostaglandin E synthase 2 [Source:MGI Symbol;Acc:MGI:1917592]
ENSMUSG00000015950	0.035	0.409	3.09	0.916	0.998	1.05	0.0127	0.0545	3.74	0.00996	0.176	3.73	0.328	0.938	1.89	Ncf1	neutrophil cytosolic factor 1 [Source:MGI Symbol;Acc:MGI:97283]
ENSMUSG00000107002	0.0352	0.409	-1.91	0.422	0.992	1.25	0.0133	0.0563	-1.94	0.506	0.832	-1.18	0.346	0.939	1.37		NCBP2 antisense RNA 2 (head to head) [Source:HGNC Symbol;Acc:HGNC:25121]
ENSMUSG00000059534	0.0352	0.409	-1.87	0.957	0.998	1.01	0.0427	0.126	-1.75	0.788	0.939	-1.07	0.171	0.918	1.54	Uqcr10	ubiquinol-cytochrome c reductase, complex III subunit X [Source:MGI Symbol;Acc:MGI:1913402]
ENSMUSG00000010607	0.0352	0.409	-1.75	0.961	0.998	1.01	0.0603	0.159	-1.57	0.786	0.939	1.06	0.989	0.999	-1	Pigyl	phosphatidylinositol glycan anchor biosynthesis, class Y-like [Source:MGI Symbol;Acc:MGI:1913518]
ENSMUSG00000059142	0.0352	0.409	-1.44	0.873	0.998	-1.02	0.0983	0.222	1.33	0.276	0.677	-1.2	0.381	0.942	-1.2	Zfp945	zinc finger protein 945 [Source:MGI Symbol;Acc:MGI:2445132]
ENSMUSG00000041650	0.0286	0.39	-1.49	0.126	0.867	-1.28	0.000298	0.00432	-1.86	0.0383	0.311	-1.38	0.291	0.929	-1.22	Pcca	propionyl-Coenzyme A carboxylase, alpha polypeptide [Source:MGI Symbol;Acc:MGI:97499]
ENSMUSG00000031134	0.0352	0.409	1.33	0.0406	0.682	1.28	0.0574	0.154	1.26	0.489	0.824	1.08	0.41	0.945	1.13	Rbmx	RNA binding motif protein, X chromosome [Source:MGI Symbol;Acc:MGI:1343044]
ENSMUSG00000034842	0.0372	0.414	-1.68	0.33	0.987	-1.23	0.00796	0.0392	-1.86	0.306	0.701	-1.24	0.383	0.942	-1.25	Art3	ADP-ribosyltransferase 3 [Source:MGI Symbol;Acc:MGI:1202729]
ENSMUSG00000028099	0.0353	0.409	-1.39	0.471	0.992	1.11	0.0742	0.183	-1.28	0.908	0.975	-1.01	0.474	0.949	1.13	Polr3c	polymerase (RNA) III (DNA directed) polypeptide C [Source:MGI Symbol;Acc:MGI:1921664]
ENSMUSG00000024597	0.0562	0.463	-1.43	0.108	0.841	-1.3	0.000601	0.00696	-1.86	0.00114	0.0607	-1.71	0.279	0.926	-1.24	Slc12a2	solute carrier family 12, member 2 [Source:MGI Symbol;Acc:MGI:101924]
ENSMUSG00000002963	0.0605	0.47	-1.41	0.764	0.998	1.05	0.000191	0.00318	-1.86	0.114	0.484	-1.26	0.654	0.962	-1.09	Pnkp	polynucleotide kinase 3'- phosphatase [Source:MGI Symbol;Acc:MGI:1891698]
ENSMUSG00000027782	0.0847	0.508	-1.41	0.0399	0.68	-1.44	0.00114	0.0106	-1.86	0.0774	0.414	-1.34	0.145	0.918	-1.35	Kpna4	karyopherin (importin) alpha 4 [Source:MGI Symbol;Acc:MGI:1100848]
ENSMUSG00000000301	0.0355	0.409	-2.57	0.834	0.998	-1.09	0.765	0.862	1.13	0.911	0.976	-1.04	0.842	0.988	-1.11	Pemt	phosphatidylethanolamine N-methyltransferase [Source:MGI Symbol;Acc:MGI:104535]
ENSMUSG00000000402	0.0355	0.409	-1.96	0.956	0.998	-1.02	0.0562	0.152	1.98	0.0165	0.221	-2.39	0.751	0.978	1.16	Egfl6	EGF-like-domain, multiple 6 [Source:MGI Symbol;Acc:MGI:1858599]
ENSMUSG00000026087	0.0355	0.409	-1.83	0.833	0.998	-1.05	0.0573	0.154	-1.64	0.697	0.906	-1.1	0.156	0.918	1.55	Mrpl30	mitochondrial ribosomal protein L30 [Source:MGI Symbol;Acc:MGI:1333820]
ENSMUSG00000001300	0.0355	0.409	-1.4	0.0258	0.619	1.44	0.561	0.712	-1.09	0.803	0.947	1.04	0.758	0.979	1.06	Efnb2	ephrin B2 [Source:MGI Symbol;Acc:MGI:105097]
ENSMUSG00000033953	0.0886	0.513	-1.34	0.0876	0.809	-1.29	0.000229	0.00362	-1.86	0.125	0.502	-1.25	0.548	0.955	-1.11	Ppp3r1	protein phosphatase 3, regulatory subunit B, alpha isoform (calcineurin B, type I) [Source:MGI Symbol;Acc:MGI:107172]
ENSMUSG00000015937	0.0355	0.409	-1.32	0.142	0.886	1.19	0.0437	0.127	-1.27	0.811	0.949	-1.03	0.665	0.963	1.06	H2afy	H2A histone family, member Y [Source:MGI Symbol;Acc:MGI:1349392]
ENSMUSG00000034898	0.0964	0.523	-1.38	0.424	0.992	-1.15	0.00102	0.00986	-1.86	0.0559	0.361	-1.37	0.598	0.956	-1.11	Filip1	filamin A interacting protein 1 [Source:MGI Symbol;Acc:MGI:1917848]
ENSMUSG00000029730	0.0355	0.409	1.58	0.333	0.987	1.22	0.0365	0.112	1.49	0.267	0.669	1.22	0.374	0.94	1.25	Mcm7	minichromosome maintenance deficient 7 (S. cerevisiae) [Source:MGI Symbol;Acc:MGI:1298398]
ENSMUSG00000031840	0.101	0.526	-1.38	0.44	0.992	-1.14	0.000632	0.00717	-1.86	0.289	0.688	1.18	0.178	0.918	1.34	Rab3a	RAB3A, member RAS oncogene family [Source:MGI Symbol;Acc:MGI:97843]
ENSMUSG00000063659	0.101	0.526	-1.27	0.42	0.992	-1.11	2.53e-05	0.000821	-1.86	0.158	0.554	-1.19	0.399	0.944	-1.14	Zbtb18	zinc finger and BTB domain containing 18 [Source:MGI Symbol;Acc:MGI:1353609]
ENSMUSG00000042599	0.116	0.545	-1.31	0.615	0.996	-1.08	0.000231	0.00364	-1.86	0.0347	0.298	-1.37	0.503	0.952	1.13	Kdm7a	lysine (K)-specific demethylase 7A [Source:MGI Symbol;Acc:MGI:2443388]
ENSMUSG00000027177	0.117	0.545	-1.35	0.13	0.871	-1.29	0.000867	0.00884	-1.86	0.0133	0.202	-1.5	0.877	0.992	1.03	Hipk3	homeodomain interacting protein kinase 3 [Source:MGI Symbol;Acc:MGI:1314882]
ENSMUSG00000091515	0.0356	0.409	-1.54	0.939	0.998	1.01	0.104	0.231	-1.35	0.752	0.926	1.06	0.0745	0.917	1.67	Zfp422-rs1	zinc finger protein 422, related sequence 1 [Source:MGI Symbol;Acc:MGI:3028594]
ENSMUSG00000025574	0.154	0.59	-1.3	0.224	0.949	-1.22	0.000251	0.0038	-1.86	0.338	0.726	1.14	0.649	0.962	-1.09	Tk1	thymidine kinase 1 [Source:MGI Symbol;Acc:MGI:98763]
ENSMUSG00000080486	0.0357	0.41	4.39	0.572	0.994	1.36	0.0807	0.193	2.89	0.16	0.556	2.14	0.695	0.968	-1.28	Snord100	small nucleolar RNA, C/D box 100 [Source:MGI Symbol;Acc:MGI:3819514]
ENSMUSG00000072849	0.0358	0.41	-4.11	0.338	0.989	-1.65	0.258	0.428	-1.91	0.971	0.993	1.02	0.259	0.924	2.66	Serpina1e	serine (or cysteine) peptidase inhibitor, clade A, member 1E [Source:MGI Symbol;Acc:MGI:891967]
ENSMUSG00000038121	0.325	0.726	-1.18	0.805	0.998	-1.04	0.000209	0.00342	-1.86	0.0265	0.268	-1.38	0.994	1	-1	Fam210a	family with sequence similarity 210, member A [Source:MGI Symbol;Acc:MGI:1914000]
ENSMUSG00000104156	0.383	0.761	-1.27	0.831	0.998	-1.06	0.00666	0.0347	-1.86	0.44	0.796	1.19	0.257	0.924	-1.4	Gm38102	predicted gene, 38102 [Source:MGI Symbol;Acc:MGI:5611330]
ENSMUSG00000074141	0.461	0.806	-1.19	0.603	0.995	-1.12	0.0017	0.0137	-1.86	0.25	0.656	-1.23	0.0335	0.863	-1.69	Il4i1	interleukin 4 induced 1 [Source:MGI Symbol;Acc:MGI:109552]
ENSMUSG00000020219	0.0359	0.41	-2.63	0.836	0.998	-1.09	0.0133	0.0563	-2.67	0.304	0.7	-1.43	0.221	0.918	1.96	Timm13	translocase of inner mitochondrial membrane 13 [Source:MGI Symbol;Acc:MGI:1353432]
ENSMUSG00000025158	0.0359	0.41	-1.41	0.347	0.99	-1.15	0.027	0.0914	-1.37	0.601	0.874	-1.07	0.585	0.955	1.1	Rfng	RFNG O-fucosylpeptide 3-beta-N-acetylglucosaminyltransferase [Source:MGI Symbol;Acc:MGI:894275]
ENSMUSG00000056342	0.594	0.868	-1.13	0.966	0.999	-1.01	0.00454	0.0264	-1.86	0.217	0.622	-1.27	0.545	0.955	1.16	Usp34	ubiquitin specific peptidase 34 [Source:MGI Symbol;Acc:MGI:109473]
ENSMUSG00000039232	0.0359	0.41	3.34	0.554	0.994	-1.35	0.0364	0.112	3.02	0.785	0.939	1.15	0.0123	0.647	7.93	Stx11	syntaxin 11 [Source:MGI Symbol;Acc:MGI:1921982]
ENSMUSG00000022303	0.0359	0.41	4.39	0.8	0.998	-1.18	0.0701	0.176	3.15	0.0685	0.394	3.16	0.4	0.944	1.96	Dcstamp	dentrocyte expressed seven transmembrane protein [Source:MGI Symbol;Acc:MGI:1923016]
ENSMUSG00000022024	0.036	0.411	1.43	0.853	0.998	1.03	0.215	0.378	1.21	0.00199	0.0816	-1.59	0.0309	0.857	-1.48	Sugt1	SGT1, suppressor of G2 allele of SKP1 (S. cerevisiae) [Source:MGI Symbol;Acc:MGI:1915205]
ENSMUSG00000037731	0.0361	0.411	2.39	0.305	0.984	1.52	0.0442	0.128	2.03	0.0744	0.407	1.97	0.138	0.917	2.25	Themis2	thymocyte selection associated family member 2 [Source:MGI Symbol;Acc:MGI:2446213]
ENSMUSG00000089862	0.00243	0.199	-1.69	0.0395	0.679	-1.37	9.41e-05	0.0019	-1.85	0.00272	0.0948	-1.56	0.0927	0.917	-1.37	Umad1	UMAP1-MVP12 associated (UMA) domain containing 1 [Source:MGI Symbol;Acc:MGI:3840148]
ENSMUSG00000039671	0.0362	0.412	1.41	0.921	0.998	-1.01	0.679	0.802	1.06	0.761	0.93	-1.04	0.678	0.965	-1.08	Zmynd8	zinc finger, MYND-type containing 8 [Source:MGI Symbol;Acc:MGI:1918025]
ENSMUSG00000026526	0.00358	0.221	-1.69	0.855	0.998	1.03	0.000334	0.00467	-1.85	0.186	0.587	-1.22	0.606	0.956	1.1	Fh1	fumarate hydratase 1 [Source:MGI Symbol;Acc:MGI:95530]
ENSMUSG00000064370	0.00601	0.259	-1.82	0.708	0.998	1.07	0.00293	0.0195	-1.85	0.478	0.816	-1.14	0.627	0.959	1.11	mt-Cytb	mitochondrially encoded cytochrome b [Source:MGI Symbol;Acc:MGI:102501]
ENSMUSG00000005803	0.00713	0.27	-1.68	0.199	0.935	-1.24	0.000647	0.00728	-1.85	0.0186	0.233	-1.47	0.11	0.917	-1.38	Sqrdl	sulfide quinone reductase-like (yeast) [Source:MGI Symbol;Acc:MGI:1929899]
ENSMUSG00000028114	0.0363	0.412	-1.29	0.633	0.997	-1.05	0.244	0.411	-1.14	0.661	0.894	1.05	0.673	0.965	-1.06	Mettl14	methyltransferase like 14 [Source:MGI Symbol;Acc:MGI:2442926]
ENSMUSG00000084552	0.0363	0.412	3.14	0.666	0.998	1.19	0.538	0.693	1.34	0.423	0.784	-1.44	0.323	0.937	-1.73	Gm24840	predicted gene, 24840 [Source:MGI Symbol;Acc:MGI:5454617]
ENSMUSG00000026032	0.0364	0.412	-2.68	0.758	0.998	1.14	0.0911	0.21	-2.02	0.479	0.817	-1.31	0.287	0.928	1.77	Ndufb3	NADH dehydrogenase (ubiquinone) 1 beta subcomplex 3 [Source:MGI Symbol;Acc:MGI:1913745]
ENSMUSG00000035027	0.0739	0.494	-1.39	0.299	0.984	-1.18	0.000528	0.00636	-1.85	0.348	0.736	-1.15	0.781	0.981	-1.05	Map2k2	mitogen-activated protein kinase kinase 2 [Source:MGI Symbol;Acc:MGI:1346867]
ENSMUSG00000020778	0.0365	0.412	-2.22	0.61	0.995	-1.19	0.25	0.418	-1.43	0.455	0.804	1.23	0.0588	0.917	2.56	Ten1	TEN1 telomerase capping complex subunit [Source:MGI Symbol;Acc:MGI:1916785]
ENSMUSG00000027004	0.0365	0.412	-1.95	0.0979	0.819	1.55	0.0612	0.161	-1.75	0.0856	0.432	1.58	0.226	0.918	1.51	Frzb	frizzled-related protein [Source:MGI Symbol;Acc:MGI:892032]
ENSMUSG00000031633	0.101	0.526	-1.33	0.59	0.994	1.08	0.000325	0.00459	-1.85	0.218	0.622	-1.2	0.974	0.999	1.01	Slc25a4	solute carrier family 25 (mitochondrial carrier, adenine nucleotide translocator), member 4 [Source:MGI Symbol;Acc:MGI:1353495]
ENSMUSG00000069094	0.0135	0.329	-1.79	0.0013	0.199	-1.98	6.35e-08	1.32e-05	-3.84	7.18e-05	0.0123	-2.31	0.000367	0.176	-2.51	Pde7a	phosphodiesterase 7A [Source:MGI Symbol;Acc:MGI:1202402]
ENSMUSG00000011096	0.156	0.592	-1.29	0.155	0.9	-1.26	0.000371	0.00501	-1.85	0.347	0.735	-1.15	0.845	0.988	-1.04	Akt1s1	AKT1 substrate 1 (proline-rich) [Source:MGI Symbol;Acc:MGI:1914855]
ENSMUSG00000078970	0.0366	0.413	-1.34	0.538	0.994	1.08	0.223	0.387	-1.16	0.889	0.969	-1.02	0.316	0.936	-1.16	Wdr92	WD repeat domain 92 [Source:MGI Symbol;Acc:MGI:2144224]
ENSMUSG00000022769	0.0366	0.413	2.44	0.834	0.998	1.09	0.0139	0.058	2.48	0.256	0.66	1.45	0.131	0.917	2.29	Sdf2l1	stromal cell-derived factor 2-like 1 [Source:MGI Symbol;Acc:MGI:2149842]
ENSMUSG00000024049	0.383	0.761	-1.16	0.838	0.998	-1.03	0.000331	0.00465	-1.85	0.86	0.961	-1.03	0.899	0.994	-1.02	Myom1	myomesin 1 [Source:MGI Symbol;Acc:MGI:1341430]
ENSMUSG00000085069	0.0368	0.414	-2.85	0.656	0.998	-1.21	0.0578	0.155	2.26	0.867	0.963	-1.08	0.141	0.917	-2.18	Gm13111	predicted gene 13111 [Source:MGI Symbol;Acc:MGI:3651882]
ENSMUSG00000019782	0.0368	0.414	-1.62	0.87	0.998	-1.03	0.032	0.102	-1.55	0.0975	0.455	-1.37	0.667	0.963	1.11	Rwdd1	RWD domain containing 1 [Source:MGI Symbol;Acc:MGI:1913771]
ENSMUSG00000020901	0.0368	0.414	4.2	0.565	0.994	-1.45	0.0247	0.0863	3.55	0.0081	0.159	4.76	0.0775	0.917	5.8	Pik3r5	phosphoinositide-3-kinase, regulatory subunit 5, p101 [Source:MGI Symbol;Acc:MGI:2443588]
ENSMUSG00000036504	0.0369	0.414	-2.72	0.459	0.992	-1.38	0.0255	0.0881	-2.13	0.427	0.787	-1.3	0.386	0.942	1.58	Phpt1	phosphohistidine phosphatase 1 [Source:MGI Symbol;Acc:MGI:1922704]
ENSMUSG00000032252	0.0369	0.414	1.36	0.317	0.986	1.14	0.115	0.247	1.23	0.977	0.995	1	0.346	0.939	-1.16	Glce	glucuronyl C5-epimerase [Source:MGI Symbol;Acc:MGI:2136405]
ENSMUSG00000032526	0.037	0.414	-1.76	0.312	0.986	-1.27	0.104	0.231	-1.49	0.79	0.939	-1.06	0.461	0.948	1.23	Deb1	differentially expressed in B16F10 1 [Source:MGI Symbol;Acc:MGI:1349474]
ENSMUSG00000055320	0.414	0.781	-1.17	0.823	0.998	-1.04	0.00129	0.0115	-1.85	0.129	0.509	-1.29	0.385	0.942	-1.19	Tead1	TEA domain family member 1 [Source:MGI Symbol;Acc:MGI:101876]
ENSMUSG00000031174	0.037	0.414	1.58	0.363	0.991	1.17	0.0486	0.137	-1.4	0.042	0.322	1.47	0.0962	0.917	-1.45	Rpgr	retinitis pigmentosa GTPase regulator [Source:MGI Symbol;Acc:MGI:1344037]
ENSMUSG00000033618	0.842	0.959	-1.05	0.599	0.995	1.12	0.00296	0.0196	-1.85	0.0752	0.408	-1.46	0.423	0.946	-1.24	Map3k13	mitogen-activated protein kinase kinase kinase 13 [Source:MGI Symbol;Acc:MGI:2444243]
ENSMUSG00000100807	0.0371	0.414	-3.64	0.162	0.907	-2.45	0.874	0.93	-1.1	0.256	0.66	1.79	0.0977	0.917	3.24	Gm29521	predicted gene 29521 [Source:MGI Symbol;Acc:MGI:5580227]
ENSMUSG00000053799	0.0204	0.356	-1.39	0.464	0.992	1.09	1.41e-05	0.000548	-1.84	0.25	0.656	-1.14	0.749	0.978	-1.05	Exoc6	exocyst complex component 6 [Source:MGI Symbol;Acc:MGI:1351611]
ENSMUSG00000068206	0.0289	0.39	-1.53	0.689	0.998	1.07	0.000876	0.00889	-1.84	0.379	0.759	-1.15	0.174	0.918	-1.34	Pick1	protein interacting with C kinase 1 [Source:MGI Symbol;Acc:MGI:894645]
ENSMUSG00000029638	0.0372	0.414	-3.17	0.354	0.991	-1.46	0.04	0.12	-2.55	0.498	0.828	-1.34	0.208	0.918	-1.86	Glcci1	glucocorticoid induced transcript 1 [Source:MGI Symbol;Acc:MGI:2179717]
ENSMUSG00000021222	0.0338	0.409	-1.38	0.0965	0.818	-1.25	3.02e-05	0.000931	-1.84	0.539	0.845	-1.08	0.802	0.985	-1.04	Dcaf4	DDB1 and CUL4 associated factor 4 [Source:MGI Symbol;Acc:MGI:1921078]
ENSMUSG00000002580	0.0372	0.414	-1.55	0.412	0.992	-1.17	0.0608	0.16	-1.42	0.93	0.982	-1.01	0.185	0.918	1.4	Mien1	migration and invasion enhancer 1 [Source:MGI Symbol;Acc:MGI:1913678]
ENSMUSG00000045318	0.0373	0.414	-2.46	0.118	0.861	-1.95	0.739	0.844	-1.14	0.492	0.825	-1.3	0.977	0.999	1.02	Adra2c	adrenergic receptor, alpha 2c [Source:MGI Symbol;Acc:MGI:87936]
ENSMUSG00000031198	0.0516	0.453	-1.43	0.426	0.992	-1.13	0.000572	0.00671	-1.84	0.0225	0.252	-1.43	0.675	0.965	-1.08	Fundc2	FUN14 domain containing 2 [Source:MGI Symbol;Acc:MGI:1914641]
ENSMUSG00000022562	0.053	0.454	-1.46	0.492	0.993	1.12	0.000931	0.00926	-1.84	0.644	0.889	-1.08	0.493	0.952	-1.15	Oplah	5-oxoprolinase (ATP-hydrolysing) [Source:MGI Symbol;Acc:MGI:1922725]
ENSMUSG00000008226	0.0556	0.46	-1.34	0.515	0.994	1.09	5.59e-05	0.00135	-1.84	0.00624	0.142	-1.44	0.0443	0.91	-1.39	Scrn3	secernin 3 [Source:MGI Symbol;Acc:MGI:1921866]
ENSMUSG00000074876	0.0374	0.414	1.78	0.864	0.998	1.04	0.0362	0.112	-1.57	0.132	0.515	-1.38	0.00136	0.281	-2.44	Spata5l1	spermatogenesis associated 5-like 1 [Source:MGI Symbol;Acc:MGI:3036261]
ENSMUSG00000024897	0.0374	0.414	1.87	0.999	1	1	0.0264	0.0902	1.78	0.271	0.671	1.32	0.639	0.96	-1.16	Apba1	amyloid beta (A4) precursor protein binding, family A, member 1 [Source:MGI Symbol;Acc:MGI:1860297]
ENSMUSG00000090086	0.0375	0.415	-1.42	0.0068	0.398	-1.57	0.339	0.515	-1.15	0.0884	0.437	1.28	0.836	0.987	-1.04	AI480526	expressed sequence AI480526 [Source:MGI Symbol;Acc:MGI:2140910]
ENSMUSG00000044308	0.0947	0.521	-1.4	0.749	0.998	-1.06	0.00156	0.0129	-1.84	0.212	0.615	-1.23	0.961	0.998	-1.01	Ubr3	ubiquitin protein ligase E3 component n-recognin 3 [Source:MGI Symbol;Acc:MGI:1861100]
ENSMUSG00000028992	0.0996	0.526	-1.34	0.145	0.891	1.26	0.000252	0.00382	-1.84	0.497	0.827	-1.11	0.687	0.967	-1.08	Nmnat1	nicotinamide nucleotide adenylyltransferase 1 [Source:MGI Symbol;Acc:MGI:1913704]
ENSMUSG00000010362	0.106	0.533	-1.44	0.917	0.998	1.02	0.00213	0.0157	-1.84	0.496	0.827	1.12	0.13	0.917	1.43	Rdm1	RAD52 motif 1 [Source:MGI Symbol;Acc:MGI:1913849]
ENSMUSG00000012819	0.27	0.694	-1.27	0.618	0.996	-1.1	0.00126	0.0112	-1.84	0.102	0.463	-1.35	0.0124	0.647	-1.78	Cdh23	cadherin 23 (otocadherin) [Source:MGI Symbol;Acc:MGI:1890219]
ENSMUSG00000024136	0.0376	0.415	2.06	0.98	0.999	-1.01	0.794	0.881	1.07	0.858	0.96	-1.04	0.932	0.995	-1.03	Dnase1l2	deoxyribonuclease 1-like 2 [Source:MGI Symbol;Acc:MGI:1913955]
ENSMUSG00000040282	0.287	0.706	-1.29	0.0451	0.706	-1.64	0.00613	0.0326	-1.84	0.0166	0.221	-1.68	0.285	0.928	-1.34	BC052040	cDNA sequence BC052040 [Source:MGI Symbol;Acc:MGI:3026886]
ENSMUSG00000044134	0.0377	0.415	-1.39	0.909	0.998	-1.02	0.0366	0.113	-1.33	0.154	0.546	-1.21	0.421	0.946	-1.16	Fam109a	family with sequence similarity 109, member A [Source:MGI Symbol;Acc:MGI:2442708]
ENSMUSG00000032041	0.56	0.854	-1.12	0.904	0.998	-1.02	0.000899	0.00905	-1.84	0.0759	0.41	1.34	0.606	0.956	-1.11	Tirap	toll-interleukin 1 receptor (TIR) domain-containing adaptor protein [Source:MGI Symbol;Acc:MGI:2152213]
ENSMUSG00000031340	0.0377	0.415	2.32	0.373	0.991	-1.38	0.201	0.362	1.5	0.527	0.841	1.19	0.446	0.948	-1.34	Gabre	gamma-aminobutyric acid (GABA) A receptor, subunit epsilon [Source:MGI Symbol;Acc:MGI:1330235]
ENSMUSG00000040447	0.79	0.943	-1.05	0.0112	0.467	-1.54	0.000855	0.00876	-1.84	0.0126	0.195	-1.53	0.00801	0.567	-1.73	Spns2	spinster homolog 2 [Source:MGI Symbol;Acc:MGI:2384936]
ENSMUSG00000001707	0.0378	0.415	1.54	0.745	0.998	-1.06	0.658	0.786	1.08	0.663	0.895	-1.08	0.545	0.955	-1.14	Eef1e1	eukaryotic translation elongation factor 1 epsilon 1 [Source:MGI Symbol;Acc:MGI:1913393]
ENSMUSG00000039954	0.0378	0.415	3.06	0.604	0.995	1.25	0.645	0.777	-1.21	0.207	0.61	-1.81	0.111	0.917	-2.35	Stk32a	serine/threonine kinase 32A [Source:MGI Symbol;Acc:MGI:2442403]
ENSMUSG00000046671	0.038	0.417	-1.3	0.483	0.993	1.08	0.024	0.0845	-1.3	0.758	0.929	1.03	0.884	0.992	-1.02	Mtfr1l	mitochondrial fission regulator 1-like [Source:MGI Symbol;Acc:MGI:1924074]
ENSMUSG00000038845	0.00682	0.267	-1.74	0.412	0.992	1.16	0.00154	0.0129	-1.83	0.819	0.951	1.04	0.729	0.975	1.08	Phb	prohibitin [Source:MGI Symbol;Acc:MGI:97572]
ENSMUSG00000027406	0.0186	0.342	-1.53	0.33	0.987	-1.16	0.000543	0.00647	-1.83	0.391	0.767	-1.14	0.63	0.959	1.09	Idh3b	isocitrate dehydrogenase 3 (NAD+) beta [Source:MGI Symbol;Acc:MGI:2158650]
ENSMUSG00000007721	0.221	0.655	-1.3	0.727	0.998	-1.07	0.00194	0.0149	-1.83	0.308	0.703	-1.19	0.668	0.964	1.1	Ccdc124	coiled-coil domain containing 124 [Source:MGI Symbol;Acc:MGI:1916403]
ENSMUSG00000028538	0.287	0.706	-1.19	0.363	0.991	-1.14	0.000231	0.00364	-1.83	0.49	0.824	-1.1	0.697	0.968	-1.07	St3gal3	ST3 beta-galactoside alpha-2,3-sialyltransferase 3 [Source:MGI Symbol;Acc:MGI:1316659]
ENSMUSG00000034035	0.0381	0.417	2.53	0.189	0.928	1.73	0.119	0.252	1.86	0.34	0.728	1.42	0.0512	0.917	-2.3	Ccdc17	coiled-coil domain containing 17 [Source:MGI Symbol;Acc:MGI:1915667]
ENSMUSG00000033910	0.0382	0.417	-1.38	0.488	0.993	-1.1	0.236	0.402	1.19	0.00144	0.068	-1.63	0.00977	0.595	-1.6	Gucy1a3	guanylate cyclase 1, soluble, alpha 3 [Source:MGI Symbol;Acc:MGI:1926562]
ENSMUSG00000046962	0.0382	0.417	1.53	0.51	0.994	-1.12	0.794	0.881	1.04	0.173	0.569	-1.25	0.933	0.995	-1.02	Zbtb21	zinc finger and BTB domain containing 21 [Source:MGI Symbol;Acc:MGI:1927240]
ENSMUSG00000056055	0.0382	0.417	3.49	0.741	0.998	1.19	0.0693	0.175	2.74	0.151	0.542	2.01	0.698	0.969	1.23	Sag	S-antigen, retina and pineal gland (arrestin) [Source:MGI Symbol;Acc:MGI:98227]
ENSMUSG00000090110	0.0383	0.418	-2.12	0.851	0.998	1.07	0.279	0.45	-1.41	0.93	0.982	-1.03	0.991	0.999	-1	Cmc4	C-x(9)-C motif containing 4 [Source:MGI Symbol;Acc:MGI:5637812]
ENSMUSG00000020392	0.745	0.928	-1.07	0.176	0.924	-1.28	0.00169	0.0136	-1.83	0.453	0.803	-1.14	0.335	0.938	-1.23	Cdkn2aipnl	CDKN2A interacting protein N-terminal like [Source:MGI Symbol;Acc:MGI:1261797]
ENSMUSG00000046756	0.0384	0.418	-1.87	0.417	0.992	1.26	0.0455	0.131	-1.73	0.427	0.787	-1.21	0.442	0.948	1.29	Mrps7	mitchondrial ribosomal protein S7 [Source:MGI Symbol;Acc:MGI:1354367]
ENSMUSG00000025762	0.00256	0.199	-1.58	0.606	0.995	-1.07	3.84e-05	0.00107	-1.82	0.448	0.801	-1.1	0.707	0.971	-1.06	Larp1b	La ribonucleoprotein domain family, member 1B [Source:MGI Symbol;Acc:MGI:1914604]
ENSMUSG00000026260	0.00579	0.257	-1.58	0.796	0.998	1.04	0.000173	0.00296	-1.82	0.705	0.91	-1.05	0.831	0.987	-1.04	Ndufa10	NADH dehydrogenase (ubiquinone) 1 alpha subcomplex 10 [Source:MGI Symbol;Acc:MGI:1914523]
ENSMUSG00000028710	0.00659	0.266	-1.56	0.35	0.99	-1.14	0.00011	0.00215	-1.82	0.189	0.589	-1.19	0.138	0.917	-1.29	Atpaf1	ATP synthase mitochondrial F1 complex assembly factor 1 [Source:MGI Symbol;Acc:MGI:2180560]
ENSMUSG00000025816	0.0131	0.328	-1.43	0.237	0.953	-1.16	1.63e-05	0.000608	-1.82	0.164	0.561	-1.18	0.222	0.918	-1.2	Sec61a2	Sec61, alpha subunit 2 (S. cerevisiae) [Source:MGI Symbol;Acc:MGI:1931071]
ENSMUSG00000002010	0.0158	0.337	-1.8	0.894	0.998	-1.03	0.00896	0.0426	-1.82	0.348	0.736	-1.21	0.679	0.966	1.11	Idh3g	isocitrate dehydrogenase 3 (NAD+), gamma [Source:MGI Symbol;Acc:MGI:1099463]
ENSMUSG00000020022	0.0196	0.35	-1.81	0.929	0.998	-1.02	0.011	0.0495	-1.82	0.945	0.986	-1.01	0.822	0.987	1.06	Ndufa12	NADH dehydrogenase (ubiquinone) 1 alpha subcomplex, 12 [Source:MGI Symbol;Acc:MGI:1913664]
ENSMUSG00000045629	0.0387	0.419	-1.54	0.97	0.999	-1.01	0.898	0.944	-1.02	0.308	0.703	-1.24	0.487	0.95	-1.21	Sh3tc2	SH3 domain and tetratricopeptide repeats 2 [Source:MGI Symbol;Acc:MGI:2444417]
ENSMUSG00000049858	0.0209	0.356	-1.4	0.402	0.992	-1.11	2.89e-05	0.000914	-1.82	0.424	0.785	-1.1	0.0264	0.831	-1.41	Suox	sulfite oxidase [Source:MGI Symbol;Acc:MGI:2446117]
ENSMUSG00000020994	0.0387	0.419	1.26	0.423	0.992	1.08	0.313	0.488	1.11	0.443	0.798	1.07	0.452	0.948	-1.09	Pnn	pinin [Source:MGI Symbol;Acc:MGI:1100514]
ENSMUSG00000050315	0.0241	0.371	-1.4	0.103	0.828	-1.24	5.49e-05	0.00133	-1.82	0.0972	0.455	-1.23	0.38	0.942	-1.14	Synpo2	synaptopodin 2 [Source:MGI Symbol;Acc:MGI:2153070]
ENSMUSG00000038650	0.0388	0.419	1.57	0.753	0.998	-1.06	0.12	0.253	1.36	0.0849	0.431	1.37	0.233	0.918	1.32	Rnh1	ribonuclease/angiogenin inhibitor 1 [Source:MGI Symbol;Acc:MGI:1195456]
ENSMUSG00000029020	0.0241	0.371	-1.32	0.0527	0.723	-1.23	2.43e-06	0.000156	-1.82	0.0685	0.394	-1.21	0.0638	0.917	-1.27	Mfn2	mitofusin 2 [Source:MGI Symbol;Acc:MGI:2442230]
ENSMUSG00000003283	0.0389	0.419	3.33	0.951	0.998	-1.04	0.07	0.176	2.83	0.0265	0.268	3.94	0.174	0.918	2.88	Hck	hemopoietic cell kinase [Source:MGI Symbol;Acc:MGI:96052]
ENSMUSG00000026853	0.0281	0.389	-1.5	0.662	0.998	1.07	0.000745	0.00795	-1.82	0.239	0.646	-1.2	0.997	1	1	Crat	carnitine acetyltransferase [Source:MGI Symbol;Acc:MGI:109501]
ENSMUSG00000028737	0.0339	0.409	-1.55	0.524	0.994	1.12	0.00197	0.015	-1.82	0.261	0.664	-1.21	0.665	0.963	-1.1	Aldh4a1	aldehyde dehydrogenase 4 family, member A1 [Source:MGI Symbol;Acc:MGI:2443883]
ENSMUSG00000026784	0.039	0.419	-1.45	0.0943	0.814	1.31	0.0499	0.14	-1.37	0.663	0.895	-1.07	0.421	0.946	1.17	Pdss1	prenyl (solanesyl) diphosphate synthase, subunit 1 [Source:MGI Symbol;Acc:MGI:1889278]
ENSMUSG00000031767	0.039	0.419	-1.44	0.579	0.994	1.09	0.358	0.535	-1.16	0.00711	0.15	-1.56	0.851	0.988	-1.04	Nudt7	nudix (nucleoside diphosphate linked moiety X)-type motif 7 [Source:MGI Symbol;Acc:MGI:1914778]
ENSMUSG00000035495	0.039	0.419	1.37	0.827	0.998	-1.03	0.929	0.961	1.01	0.495	0.827	1.09	0.51	0.952	-1.11	Tstd2	thiosulfate sulfurtransferase (rhodanese)-like domain containing 2 [Source:MGI Symbol;Acc:MGI:3039624]
ENSMUSG00000041362	0.039	0.419	2.14	0.45	0.992	1.33	0.0118	0.0515	2.61	0.261	0.664	1.44	0.549	0.955	1.33	Shtn1	shootin 1 [Source:MGI Symbol;Acc:MGI:1918903]
ENSMUSG00000038055	0.0391	0.419	-1.57	0.622	0.997	-1.1	0.105	0.232	-1.37	0.957	0.989	-1.01	0.871	0.99	-1.04	Dexi	dexamethasone-induced transcript [Source:MGI Symbol;Acc:MGI:1926236]
ENSMUSG00000072115	0.0391	0.419	2.46	0.238	0.954	-1.51	0.0503	0.141	2.1	0.0495	0.343	2.58	0.771	0.98	-1.18	Ang	angiogenin, ribonuclease, RNase A family, 5 [Source:MGI Symbol;Acc:MGI:88022]
ENSMUSG00000029047	0.041	0.422	-1.46	0.342	0.99	1.17	0.000221	0.00354	-1.82	0.584	0.867	-1.08	0.126	0.917	-1.33	Pex10	peroxisomal biogenesis factor 10 [Source:MGI Symbol;Acc:MGI:2684988]
ENSMUSG00000022751	0.0392	0.419	-1.45	0.267	0.967	1.21	0.595	0.739	-1.09	0.705	0.91	1.06	0.756	0.979	-1.06	Nit2	nitrilase family, member 2 [Source:MGI Symbol;Acc:MGI:1261838]
ENSMUSG00000089989	0.0392	0.419	1.61	0.783	0.998	1.07	0.0465	0.133	1.49	0.986	0.997	-1	0.191	0.918	-1.43	Flt3l	FMS-like tyrosine kinase 3 ligand [Source:MGI Symbol;Acc:MGI:95560]
ENSMUSG00000087107	0.0392	0.419	3.99	0.571	0.994	-1.43	0.0117	0.0515	4.47	0.0151	0.213	4.52	0.0591	0.917	5.84	AI662270	expressed sequence AI662270 [Source:MGI Symbol;Acc:MGI:2144254]
ENSMUSG00000017778	0.0393	0.419	-1.82	0.452	0.992	-1.21	0.854	0.918	-1.05	0.306	0.701	1.28	0.993	0.999	1	Cox7c	cytochrome c oxidase subunit VIIc [Source:MGI Symbol;Acc:MGI:103226]
ENSMUSG00000030747	0.0393	0.419	-1.61	0.681	0.998	-1.09	0.0356	0.11	1.58	0.0243	0.26	-1.6	0.699	0.969	-1.1	Dgat2	diacylglycerol O-acyltransferase 2 [Source:MGI Symbol;Acc:MGI:1915050]
ENSMUSG00000056268	0.0446	0.434	-1.43	0.835	0.998	-1.03	0.000504	0.00616	-1.82	0.0252	0.262	-1.42	0.962	0.998	-1.01	Dennd1b	DENN/MADD domain containing 1B [Source:MGI Symbol;Acc:MGI:2447812]
ENSMUSG00000072704	0.142	0.58	-1.32	0.831	0.998	1.04	0.00107	0.0102	-1.82	0.129	0.51	-1.27	0.783	0.982	-1.06	Smim10l1	small integral membrane protein 10 like 1 [Source:MGI Symbol;Acc:MGI:1914379]
ENSMUSG00000060791	0.0393	0.419	2.69	0.902	0.998	-1.05	0.0497	0.14	2.24	0.126	0.504	1.93	0.256	0.923	2.03	Gmfg	glia maturation factor, gamma [Source:MGI Symbol;Acc:MGI:1927135]
ENSMUSG00000024983	0.205	0.641	-1.19	0.988	0.999	-1	7.63e-06	0.000345	-1.82	0.416	0.781	1.1	0.936	0.996	1.01	Vti1a	vesicle transport through interaction with t-SNAREs 1A [Source:MGI Symbol;Acc:MGI:1855699]
ENSMUSG00000031600	0.224	0.657	-1.26	0.67	0.998	-1.07	0.00102	0.00986	-1.82	0.0117	0.188	-1.51	0.59	0.955	-1.11	Vps37a	vacuolar protein sorting 37A (yeast) [Source:MGI Symbol;Acc:MGI:1261835]
ENSMUSG00000020473	0.506	0.829	1.15	0.282	0.974	-1.22	0.813	0.892	1.05	1.94e-05	0.00483	-2.31	0.007	0.54	-1.85	Aebp1	AE binding protein 1 [Source:MGI Symbol;Acc:MGI:1197012]
ENSMUSG00000084940	0.724	0.918	1.09	0.712	0.998	1.09	0.00395	0.024	-1.82	0.146	0.537	-1.31	0.228	0.918	-1.36	Gm15935	predicted gene 15935 [Source:MGI Symbol;Acc:MGI:3801894]
ENSMUSG00000074754	0.0395	0.419	-2.43	0.805	0.998	1.1	0.117	0.25	-1.75	0.675	0.898	-1.15	0.295	0.932	1.75	Gm561	predicted gene 561 [Source:MGI Symbol;Acc:MGI:2685407]
ENSMUSG00000039959	0.0395	0.419	1.41	0.42	0.992	1.12	0.0364	0.112	1.38	0.612	0.877	-1.07	0.204	0.918	-1.25	Hip1	huntingtin interacting protein 1 [Source:MGI Symbol;Acc:MGI:1099804]
ENSMUSG00000027346	0.156	0.592	-1.42	0.0266	0.623	-1.64	8.17e-06	0.000363	-3.1	0.000247	0.0258	-2.26	0.00863	0.589	-2.02	Gpcpd1	glycerophosphocholine phosphodiesterase GDE1 homolog (S. cerevisiae) [Source:MGI Symbol;Acc:MGI:104898]
ENSMUSG00000024140	0.0396	0.419	-1.44	0.534	0.994	-1.1	0.057	0.153	-1.37	0.0585	0.367	-1.33	0.367	0.94	-1.18	Epas1	endothelial PAS domain protein 1 [Source:MGI Symbol;Acc:MGI:109169]
ENSMUSG00000020256	0.021	0.356	-1.57	0.0907	0.813	-1.35	0.00157	0.013	-1.81	0.915	0.976	1.02	0.645	0.96	1.1	Aldh1l2	aldehyde dehydrogenase 1 family, member L2 [Source:MGI Symbol;Acc:MGI:2444680]
ENSMUSG00000033166	0.0396	0.419	1.31	0.75	0.998	-1.04	0.0443	0.128	1.27	0.298	0.695	1.12	0.545	0.955	-1.09	Dis3	DIS3 mitotic control homolog (S. cerevisiae) [Source:MGI Symbol;Acc:MGI:1919912]
ENSMUSG00000047379	0.0277	0.389	-1.54	0.779	0.998	-1.05	0.000677	0.00748	-1.81	0.963	0.991	1.01	0.151	0.918	1.37	B4gat1	beta-1,4-glucuronyltransferase 1 [Source:MGI Symbol;Acc:MGI:1919680]
ENSMUSG00000011179	0.149	0.587	-1.33	9e-05	0.0692	-2.08	0.0695	0.175	-1.4	1.14e-05	0.00357	-2.25	3.49e-05	0.0328	-2.56	Odc1	ornithine decarboxylase, structural 1 [Source:MGI Symbol;Acc:MGI:97402]
ENSMUSG00000022339	0.0494	0.449	-1.5	0.0211	0.583	-1.51	0.00154	0.0129	-1.81	0.0408	0.319	-1.42	0.66	0.963	1.1	Ebag9	estrogen receptor-binding fragment-associated gene 9 [Source:MGI Symbol;Acc:MGI:1859920]
ENSMUSG00000026209	0.0398	0.42	-1.47	0.922	0.998	-1.02	0.167	0.319	-1.26	0.824	0.952	1.04	0.354	0.94	1.21	Dnpep	aspartyl aminopeptidase [Source:MGI Symbol;Acc:MGI:1278328]
ENSMUSG00000083012	0.0774	0.498	-1.32	0.148	0.893	-1.22	9.67e-05	0.00195	-1.81	0.36	0.746	-1.13	0.746	0.978	-1.06	Fam220a	family with sequence similarity 220, member A [Source:MGI Symbol;Acc:MGI:1914488]
ENSMUSG00000024989	0.0398	0.42	4.13	0.396	0.992	1.85	0.0472	0.134	3.52	0.205	0.607	2.13	0.165	0.918	2.96	Cep55	centrosomal protein 55 [Source:MGI Symbol;Acc:MGI:1921357]
ENSMUSG00000023092	0.0399	0.42	-1.5	0.261	0.963	-1.21	0.0394	0.119	1.46	0.292	0.691	1.19	0.0411	0.91	1.51	Fhl1	four and a half LIM domains 1 [Source:MGI Symbol;Acc:MGI:1298387]
ENSMUSG00000050212	0.04	0.421	-2.22	0.774	0.998	-1.14	0.643	0.775	1.17	0.412	0.778	-1.31	0.757	0.979	-1.16	Eva1b	eva-1 homolog B (C. elegans) [Source:MGI Symbol;Acc:MGI:1922063]
ENSMUSG00000033088	0.0849	0.508	-1.37	0.0136	0.508	-1.5	0.000693	0.0076	-1.81	0.888	0.969	-1.02	0.511	0.952	1.13	Triobp	TRIO and F-actin binding protein [Source:MGI Symbol;Acc:MGI:1349410]
ENSMUSG00000061175	0.04	0.421	1.84	0.61	0.995	-1.15	0.91	0.95	1.03	0.98	0.996	-1.01	0.657	0.963	1.15	Fnip2	folliculin interacting protein 2 [Source:MGI Symbol;Acc:MGI:2683054]
ENSMUSG00000039018	0.0401	0.421	-1.54	0.762	0.998	-1.06	0.0198	0.0741	-1.55	0.895	0.971	1.02	0.624	0.958	1.11	Mtg1	mitochondrial GTPase 1 homolog (S. cerevisiae) [Source:MGI Symbol;Acc:MGI:2685015]
ENSMUSG00000027286	0.0401	0.421	-1.32	0.945	0.998	1.01	0.0433	0.127	-1.28	0.596	0.872	1.06	0.443	0.948	1.12	Lrrc57	leucine rich repeat containing 57 [Source:MGI Symbol;Acc:MGI:1913856]
ENSMUSG00000031333	0.117	0.545	-1.38	0.307	0.984	-1.2	0.00228	0.0165	-1.81	0.166	0.561	-1.27	0.737	0.977	1.07	Abcb7	ATP-binding cassette, sub-family B (MDR/TAP), member 7 [Source:MGI Symbol;Acc:MGI:109533]
ENSMUSG00000033707	0.177	0.613	-1.33	0.727	0.998	-1.07	0.00205	0.0154	-1.81	0.319	0.71	-1.19	0.901	0.994	1.03	Lrrc24	leucine rich repeat containing 24 [Source:MGI Symbol;Acc:MGI:3605040]
ENSMUSG00000030029	0.179	0.616	-1.2	0.0101	0.467	-1.37	1.71e-05	0.000629	-1.81	0.0686	0.394	-1.24	0.00603	0.529	-1.5	Lrig1	leucine-rich repeats and immunoglobulin-like domains 1 [Source:MGI Symbol;Acc:MGI:107935]
ENSMUSG00000036052	0.298	0.713	-1.19	0.000983	0.178	-1.65	0.000286	0.00418	-1.81	0.00386	0.109	-1.52	0.0311	0.857	-1.46	Dnajb5	DnaJ (Hsp40) homolog, subfamily B, member 5 [Source:MGI Symbol;Acc:MGI:1930018]
ENSMUSG00000030528	0.0403	0.421	1.94	0.202	0.936	1.42	0.814	0.893	-1.06	0.21	0.613	1.39	0.136	0.917	1.75	Blm	Bloom syndrome, RecQ helicase-like [Source:MGI Symbol;Acc:MGI:1328362]
ENSMUSG00000026581	0.0403	0.421	5.49	0.872	0.998	-1.13	0.0672	0.172	3.9	0.0677	0.392	4.58	0.428	0.946	1.95	Sell	selectin, lymphocyte [Source:MGI Symbol;Acc:MGI:98279]
ENSMUSG00000059824	0.0404	0.421	-1.95	0.525	0.994	-1.2	0.255	0.424	1.41	0.534	0.843	-1.19	0.395	0.944	-1.34	Dbp	D site albumin promoter binding protein [Source:MGI Symbol;Acc:MGI:94866]
ENSMUSG00000033365	0.331	0.73	-1.21	0.853	0.998	-1.03	0.00199	0.0151	-1.81	0.0135	0.202	-1.53	0.0706	0.917	-1.46	Ipo13	importin 13 [Source:MGI Symbol;Acc:MGI:2385205]
ENSMUSG00000034037	0.0404	0.421	-1.26	0.432	0.992	-1.08	0.149	0.294	-1.15	0.208	0.612	-1.13	0.284	0.928	-1.14	Fgd5	FYVE, RhoGEF and PH domain containing 5 [Source:MGI Symbol;Acc:MGI:2443369]
ENSMUSG00000020864	0.00382	0.222	-1.52	0.695	0.998	-1.05	3.08e-05	0.000937	-1.8	0.102	0.464	-1.22	0.522	0.953	-1.1	Ankrd40	ankyrin repeat domain 40 [Source:MGI Symbol;Acc:MGI:1918702]
ENSMUSG00000042489	0.0404	0.421	5.23	0.788	0.998	1.21	0.0181	0.0696	5.96	0.0168	0.223	5.33	0.165	0.918	4.23	Clspn	claspin [Source:MGI Symbol;Acc:MGI:2445153]
ENSMUSG00000033526	0.00938	0.292	-1.47	0.788	0.998	-1.03	4.58e-05	0.0012	-1.8	0.0128	0.197	-1.36	0.0734	0.917	-1.31	Ppip5k1	diphosphoinositol pentakisphosphate kinase 1 [Source:MGI Symbol;Acc:MGI:2443281]
ENSMUSG00000035697	0.0405	0.421	2.33	0.281	0.974	1.58	0.0138	0.0577	2.51	0.00407	0.112	3.15	0.174	0.918	2.17	Hmha1	histocompatibility (minor) HA-1 [Source:MGI Symbol;Acc:MGI:1917969]
ENSMUSG00000052738	0.0099	0.295	-1.7	0.637	0.997	1.09	0.00248	0.0174	-1.8	0.251	0.656	-1.22	0.345	0.939	1.22	Suclg1	succinate-CoA ligase, GDP-forming, alpha subunit [Source:MGI Symbol;Acc:MGI:1927234]
ENSMUSG00000025374	0.024	0.371	-1.61	0.967	0.999	-1.01	0.00196	0.015	-1.8	0.684	0.902	-1.07	0.798	0.984	1.06	Nabp2	nucleic acid binding protein 2 [Source:MGI Symbol;Acc:MGI:1917167]
ENSMUSG00000036678	0.0406	0.422	1.47	0.21	0.941	1.25	0.161	0.311	1.26	0.00233	0.0884	1.67	0.987	0.999	-1	Aaas	achalasia, adrenocortical insufficiency, alacrimia [Source:MGI Symbol;Acc:MGI:2443767]
ENSMUSG00000021140	0.0304	0.393	-1.38	0.477	0.992	-1.1	6.3e-05	0.00146	-1.8	0.301	0.697	-1.14	0.394	0.944	-1.14	Pcnx	pecanex homolog (Drosophila) [Source:MGI Symbol;Acc:MGI:1891924]
ENSMUSG00000053740	0.0407	0.422	-2.27	0.771	0.998	-1.11	0.282	0.454	-1.49	0.375	0.756	1.34	0.203	0.918	1.99	Gm6457	predicted pseudogene 6457 [Source:MGI Symbol;Acc:MGI:3648519]
ENSMUSG00000028933	0.0426	0.428	-1.59	0.333	0.987	-1.2	0.00187	0.0147	-1.8	0.924	0.979	1.02	0.87	0.99	-1.04	Xrcc2	X-ray repair complementing defective repair in Chinese hamster cells 2 [Source:MGI Symbol;Acc:MGI:1927345]
ENSMUSG00000018932	0.0741	0.495	-1.34	0.00909	0.449	-1.47	0.000264	0.00394	-1.8	0.634	0.885	-1.07	0.147	0.918	-1.28	Map2k3	mitogen-activated protein kinase kinase 3 [Source:MGI Symbol;Acc:MGI:1346868]
ENSMUSG00000096780	0.0408	0.422	-2.24	0.43	0.992	1.39	0.0156	0.0627	3.14	0.689	0.904	1.12	0.442	0.948	1.42	Tmem181b-ps	transmembrane protein 181B, pseudogene [Source:MGI Symbol;Acc:MGI:3779544]
ENSMUSG00000024780	0.0408	0.422	-1.29	0.698	0.998	1.04	0.0147	0.0601	-1.33	0.026	0.267	-1.27	0.544	0.955	-1.08	Cdc37l1	cell division cycle 37-like 1 [Source:MGI Symbol;Acc:MGI:1914322]
ENSMUSG00000022450	0.0409	0.422	-2	0.564	0.994	1.19	0.17	0.324	-1.51	0.492	0.825	-1.21	0.29	0.928	1.52	Ndufa6	NADH dehydrogenase (ubiquinone) 1 alpha subcomplex, 6 (B14) [Source:MGI Symbol;Acc:MGI:1914380]
ENSMUSG00000032860	0.0409	0.422	-1.44	0.0926	0.813	-1.31	0.022	0.0798	-1.45	0.676	0.898	1.06	0.342	0.938	1.19	P2ry2	purinergic receptor P2Y, G-protein coupled 2 [Source:MGI Symbol;Acc:MGI:105107]
ENSMUSG00000028557	0.0797	0.501	-1.32	0.23	0.951	-1.18	0.000173	0.00296	-1.8	0.209	0.613	-1.18	0.41	0.945	-1.15	Rnf11	ring finger protein 11 [Source:MGI Symbol;Acc:MGI:1352759]
ENSMUSG00000028837	0.041	0.422	-1.67	0.823	0.998	-1.05	0.191	0.349	-1.35	0.708	0.91	-1.08	0.74	0.977	1.09	Psmb2	proteasome (prosome, macropain) subunit, beta type 2 [Source:MGI Symbol;Acc:MGI:1347045]
ENSMUSG00000037570	0.0933	0.521	-1.36	0.117	0.861	-1.3	0.000372	0.00502	-1.8	0.555	0.855	1.09	0.72	0.972	1.07	Mcrs1	microspherule protein 1 [Source:MGI Symbol;Acc:MGI:1858420]
ENSMUSG00000027673	0.106	0.533	-1.47	0.34	0.99	-1.22	0.00962	0.0448	-1.8	0.974	0.994	-1.01	0.922	0.995	-1.02	Ndufb5	NADH dehydrogenase (ubiquinone) 1 beta subcomplex, 5 [Source:MGI Symbol;Acc:MGI:1913296]
ENSMUSG00000024843	0.041	0.423	1.89	0.235	0.953	-1.39	0.0218	0.0792	1.83	0.92	0.978	-1.03	0.515	0.952	-1.22	Chka	choline kinase alpha [Source:MGI Symbol;Acc:MGI:107760]
ENSMUSG00000027709	0.0411	0.423	-1.36	0.381	0.991	-1.12	0.58	0.727	-1.08	0.441	0.797	-1.1	0.556	0.955	-1.1	Mccc1	methylcrotonoyl-Coenzyme A carboxylase 1 (alpha) [Source:MGI Symbol;Acc:MGI:1919289]
ENSMUSG00000097636	0.0412	0.424	3.62	0.728	0.998	1.22	0.0149	0.0607	4.32	0.604	0.875	1.34	0.341	0.938	1.96	Mirt1	myocardial infarction associated transcript 1 [Source:MGI Symbol;Acc:MGI:1922001]
ENSMUSG00000037577	0.0413	0.424	-2.66	0.182	0.927	-1.85	0.134	0.273	1.96	0.69	0.904	-1.19	0.914	0.994	-1.07	Ephx3	epoxide hydrolase 3 [Source:MGI Symbol;Acc:MGI:1919182]
ENSMUSG00000061979	0.135	0.569	-1.28	0.284	0.974	-1.18	0.000131	0.00242	-1.8	0.17	0.565	-1.2	0.911	0.994	-1.02	Wbscr16	Williams-Beuren syndrome chromosome region 16 homolog (human) [Source:MGI Symbol;Acc:MGI:2137600]
ENSMUSG00000049038	0.204	0.64	-1.35	0.0674	0.764	1.46	0.00645	0.0339	-1.8	0.988	0.998	-1	0.741	0.977	-1.09	Mterf2	mitochondrial transcription termination factor 2 [Source:MGI Symbol;Acc:MGI:1921488]
ENSMUSG00000026097	0.0414	0.424	-1.45	0.303	0.984	1.18	0.533	0.689	-1.11	0.675	0.898	-1.07	0.437	0.946	-1.16	Ormdl1	ORM1-like 1 (S. cerevisiae) [Source:MGI Symbol;Acc:MGI:2181669]
ENSMUSG00000008318	0.914	0.982	1.02	0.599	0.995	-1.1	0.000838	0.00863	-1.8	0.628	0.883	1.08	0.676	0.965	1.1	Relt	RELT tumor necrosis factor receptor [Source:MGI Symbol;Acc:MGI:2443373]
ENSMUSG00000020671	0.0101	0.297	-1.36	0.115	0.855	-1.18	1.92e-06	0.000135	-1.79	0.0196	0.239	-1.27	0.251	0.923	-1.15	Rab10	RAB10, member RAS oncogene family [Source:MGI Symbol;Acc:MGI:105066]
ENSMUSG00000002032	0.0242	0.371	-1.63	0.971	0.999	-1.01	0.00175	0.014	-1.79	0.725	0.917	1.06	0.432	0.946	1.2	Tmem25	transmembrane protein 25 [Source:MGI Symbol;Acc:MGI:1918937]
ENSMUSG00000024941	0.0539	0.456	-1.34	0.661	0.998	-1.06	7.94e-05	0.0017	-1.79	0.202	0.604	-1.17	0.833	0.987	1.03	Scyl1	SCY1-like 1 (S. cerevisiae) [Source:MGI Symbol;Acc:MGI:1931787]
ENSMUSG00000038690	0.0417	0.425	-2.04	0.951	0.998	1.02	0.283	0.455	-1.41	0.868	0.963	-1.05	0.381	0.942	1.38	Atp5j2	ATP synthase, H+ transporting, mitochondrial F0 complex, subunit F2 [Source:MGI Symbol;Acc:MGI:1927558]
ENSMUSG00000001249	0.0417	0.425	-1.5	0.392	0.991	-1.17	0.0423	0.125	-1.43	0.142	0.531	-1.29	0.188	0.918	-1.34	Hpn	hepsin [Source:MGI Symbol;Acc:MGI:1196620]
ENSMUSG00000020661	0.0757	0.497	-1.38	0.277	0.968	-1.19	0.000978	0.00958	-1.79	0.886	0.969	1.02	0.98	0.999	-1	Dnmt3a	DNA methyltransferase 3A [Source:MGI Symbol;Acc:MGI:1261827]
ENSMUSG00000049526	0.0417	0.425	2.84	0.27	0.968	-1.73	0.0508	0.142	2.62	0.121	0.494	2.06	0.503	0.952	-1.44	Tmem202	transmembrane protein 202 [Source:MGI Symbol;Acc:MGI:1921143]
ENSMUSG00000036751	0.0418	0.425	-3.32	0.885	0.998	1.08	0.177	0.332	-2.07	0.771	0.932	-1.15	0.159	0.918	2.37	Cox6b1	cytochrome c oxidase, subunit VIb polypeptide 1 [Source:MGI Symbol;Acc:MGI:107460]
ENSMUSG00000074218	0.0418	0.425	-2.92	0.68	0.998	-1.2	0.085	0.2	-2.28	0.308	0.702	-1.56	0.13	0.917	2.42	Cox7a1	cytochrome c oxidase subunit VIIa 1 [Source:MGI Symbol;Acc:MGI:1316714]
ENSMUSG00000057388	0.0829	0.505	-1.56	0.753	0.998	1.07	0.0101	0.0466	-1.79	0.844	0.957	-1.04	0.666	0.963	1.13	Mrpl18	mitochondrial ribosomal protein L18 [Source:MGI Symbol;Acc:MGI:1914931]
ENSMUSG00000075122	0.0418	0.425	3.67	0.0656	0.757	3.21	0.247	0.414	1.77	0.0419	0.322	2.97	0.606	0.956	1.4	Cd80	CD80 antigen [Source:MGI Symbol;Acc:MGI:101775]
ENSMUSG00000028756	0.113	0.543	-1.31	0.879	0.998	1.02	0.000569	0.00668	-1.79	0.00226	0.0875	-1.59	0.0323	0.861	-1.47	Pink1	PTEN induced putative kinase 1 [Source:MGI Symbol;Acc:MGI:1916193]
ENSMUSG00000022370	0.042	0.427	-2.03	0.428	0.992	1.28	0.391	0.566	-1.3	0.506	0.832	-1.21	0.119	0.917	1.98	Mrpl13	mitochondrial ribosomal protein L13 [Source:MGI Symbol;Acc:MGI:2137218]
ENSMUSG00000023963	0.115	0.544	-1.4	0.275	0.968	-1.23	0.00415	0.0247	-1.79	0.00114	0.0607	-1.92	0.00156	0.286	-2.2	Cyp39a1	cytochrome P450, family 39, subfamily a, polypeptide 1 [Source:MGI Symbol;Acc:MGI:1927096]
ENSMUSG00000032198	0.0421	0.427	-1.32	0.298	0.983	-1.14	0.218	0.382	-1.16	0.47	0.812	-1.09	0.149	0.918	-1.24	Dock6	dedicator of cytokinesis 6 [Source:MGI Symbol;Acc:MGI:1914789]
ENSMUSG00000020366	0.126	0.557	-1.24	0.0978	0.819	-1.23	4.15e-05	0.00113	-1.79	0.0232	0.255	-1.32	0.169	0.918	-1.23	Mapk9	mitogen-activated protein kinase 9 [Source:MGI Symbol;Acc:MGI:1346862]
ENSMUSG00000042613	0.293	0.711	-1.16	0.0156	0.523	-1.35	3.85e-05	0.00108	-1.79	0.424	0.784	-1.1	0.0554	0.917	-1.33	Pbxip1	pre B cell leukemia transcription factor interacting protein 1 [Source:MGI Symbol;Acc:MGI:2441670]
ENSMUSG00000084349	0.0422	0.428	2.95	0.255	0.963	-1.72	0.683	0.804	1.2	0.307	0.702	1.77	0.773	0.98	-1.2	Rpl3-ps1	ribosomal protein L3, pseudogene 1 [Source:MGI Symbol;Acc:MGI:3644217]
ENSMUSG00000000628	0.318	0.724	-1.21	0.0657	0.757	-1.37	0.00176	0.014	-1.79	0.795	0.943	-1.04	0.929	0.995	-1.02	Hk2	hexokinase 2 [Source:MGI Symbol;Acc:MGI:1315197]
ENSMUSG00000042050	0.00195	0.194	-1.47	0.00869	0.438	-1.33	1.05e-06	9.14e-05	-1.78	0.172	0.568	-1.15	0.0891	0.917	-1.25	Wdr60	WD repeat domain 60 [Source:MGI Symbol;Acc:MGI:2445085]
ENSMUSG00000027222	0.0424	0.428	-1.53	0.129	0.869	-1.34	0.0916	0.211	-1.36	0.675	0.898	1.07	0.851	0.988	-1.04	Pex16	peroxisomal biogenesis factor 16 [Source:MGI Symbol;Acc:MGI:1338829]
ENSMUSG00000003559	0.0021	0.198	-1.58	0.262	0.963	1.15	4.36e-05	0.00116	-1.78	0.219	0.625	1.17	0.511	0.952	1.11	As3mt	arsenic (+3 oxidation state) methyltransferase [Source:MGI Symbol;Acc:MGI:1929882]
ENSMUSG00000036352	0.00512	0.244	-1.44	0.576	0.994	-1.06	8.3e-06	0.000364	-1.78	0.743	0.924	1.04	0.502	0.952	-1.09	Ubac1	ubiquitin associated domain containing 1 [Source:MGI Symbol;Acc:MGI:1920995]
ENSMUSG00000039523	0.0224	0.363	-1.32	0.862	0.998	1.02	2.47e-06	0.000156	-1.78	0.446	0.8	-1.08	0.0167	0.723	-1.36	Cep104	centrosomal protein 104 [Source:MGI Symbol;Acc:MGI:2687282]
ENSMUSG00000030889	0.0425	0.428	2.26	0.491	0.993	1.22	0.843	0.911	1.06	0.00827	0.161	-2.09	0.105	0.917	-1.69	Vwa3a	von Willebrand factor A domain containing 3A [Source:MGI Symbol;Acc:MGI:3041229]
ENSMUSG00000059406	0.0425	0.428	3.11	0.957	0.998	1.03	0.182	0.338	1.94	0.382	0.761	-1.5	0.741	0.977	1.23	Tmprss9	transmembrane protease, serine 9 [Source:MGI Symbol;Acc:MGI:3612246]
ENSMUSG00000026578	0.0298	0.392	-1.46	0.33	0.987	1.17	0.000495	0.00607	-1.78	0.646	0.89	1.07	0.417	0.946	1.17	Ccdc181	coiled-coil domain containing 181 [Source:MGI Symbol;Acc:MGI:1922145]
ENSMUSG00000064351	0.0306	0.394	-1.53	0.304	0.984	1.19	0.00245	0.0173	-1.78	0.0679	0.393	-1.35	0.879	0.992	1.03	mt-Co1	mitochondrially encoded cytochrome c oxidase I [Source:MGI Symbol;Acc:MGI:102504]
ENSMUSG00000022354	0.0459	0.44	-1.49	0.578	0.994	-1.1	0.0027	0.0185	-1.78	0.3	0.696	-1.19	0.846	0.988	-1.04	Ndufb9	NADH dehydrogenase (ubiquinone) 1 beta subcomplex, 9 [Source:MGI Symbol;Acc:MGI:1913468]
ENSMUSG00000042650	0.0556	0.46	-1.32	0.931	0.998	1.01	6.23e-05	0.00146	-1.78	0.0277	0.273	-1.31	0.645	0.96	-1.07	Alkbh5	alkB, alkylation repair homolog 5 (E. coli) [Source:MGI Symbol;Acc:MGI:2144489]
ENSMUSG00000027249	0.0426	0.428	3.37	0.0876	0.809	-2.65	0.115	0.248	2.33	0.117	0.488	2.35	0.609	0.956	1.43	F2	coagulation factor II [Source:MGI Symbol;Acc:MGI:88380]
ENSMUSG00000024208	0.0427	0.428	-1.86	0.89	0.998	-1.04	0.174	0.329	-1.46	0.423	0.784	-1.22	0.677	0.965	1.14	Uqcc2	ubiquinol-cytochrome c reductase complex assembly factor 2 [Source:MGI Symbol;Acc:MGI:1914517]
ENSMUSG00000024477	0.0614	0.472	-1.41	0.842	0.998	-1.03	0.00124	0.0111	-1.78	0.0134	0.202	-1.52	0.295	0.932	1.26	Pggt1b	protein geranylgeranyltransferase type I, beta subunit [Source:MGI Symbol;Acc:MGI:1917514]
ENSMUSG00000051469	0.0749	0.496	-1.3	0.215	0.942	-1.17	5.99e-05	0.00142	-1.78	0.057	0.364	-1.27	0.707	0.971	-1.06	Zfp191	zinc finger protein 191 [Source:MGI Symbol;Acc:MGI:1929704]
ENSMUSG00000026709	0.123	0.554	-1.26	0.338	0.989	1.13	4.06e-05	0.00111	-1.78	0.35	0.737	-1.13	0.288	0.928	-1.18	Dars2	aspartyl-tRNA synthetase 2 (mitochondrial) [Source:MGI Symbol;Acc:MGI:2442510]
ENSMUSG00000020038	0.254	0.68	-1.24	0.237	0.953	-1.22	0.000701	0.00763	-1.78	0.227	0.635	-1.21	0.546	0.955	-1.13	Cry1	cryptochrome 1 (photolyase-like) [Source:MGI Symbol;Acc:MGI:1270841]
ENSMUSG00000082361	0.0429	0.429	-2.42	0.04	0.68	-2.31	0.812	0.891	-1.1	0.478	0.816	-1.34	0.941	0.996	1.04	Btc	betacellulin, epidermal growth factor family member [Source:MGI Symbol;Acc:MGI:99439]
ENSMUSG00000026499	0.0429	0.429	1.41	0.369	0.991	1.15	0.0948	0.216	1.28	0.655	0.892	-1.07	0.263	0.924	1.24	Acbd3	acyl-Coenzyme A binding domain containing 3 [Source:MGI Symbol;Acc:MGI:2181074]
ENSMUSG00000006021	0.316	0.722	-1.2	0.487	0.993	-1.12	0.000673	0.00745	-1.78	0.844	0.957	1.03	0.24	0.921	-1.25	Kptn	kaptin [Source:MGI Symbol;Acc:MGI:1890380]
ENSMUSG00000061462	0.595	0.868	-1.11	0.731	0.998	-1.06	0.00362	0.0225	-1.78	0.314	0.706	-1.19	0.316	0.936	-1.24	Obscn	obscurin, cytoskeletal calmodulin and titin-interacting RhoGEF [Source:MGI Symbol;Acc:MGI:2681862]
ENSMUSG00000091985	0.765	0.934	-1.06	0.433	0.992	-1.15	0.00127	0.0113	-1.78	0.0945	0.45	-1.32	0.00428	0.436	-1.85	Gm17354	predicted gene, 17354 [Source:MGI Symbol;Acc:MGI:4936988]
ENSMUSG00000025477	0.000321	0.104	-1.71	0.116	0.859	-1.21	4.43e-05	0.00118	-1.77	0.269	0.67	-1.14	0.802	0.985	1.04	Inpp5a	inositol polyphosphate-5-phosphatase A [Source:MGI Symbol;Acc:MGI:2686961]
ENSMUSG00000085241	0.0431	0.429	-3.34	0.969	0.999	-1.02	0.462	0.629	1.52	0.0676	0.392	2.66	0.876	0.992	1.12	Snhg3	small nucleolar RNA host gene 3 [Source:MGI Symbol;Acc:MGI:2684817]
ENSMUSG00000042298	0.00121	0.175	-1.53	0.612	0.995	1.06	7.47e-06	0.000339	-1.77	0.31	0.703	-1.11	0.744	0.977	-1.04	Ttc19	tetratricopeptide repeat domain 19 [Source:MGI Symbol;Acc:MGI:1920045]
ENSMUSG00000063060	0.0433	0.429	-1.62	0.145	0.891	1.37	0.0223	0.0805	-1.66	0.0937	0.449	-1.4	0.866	0.99	-1.05	Sox7	SRY (sex determining region Y)-box 7 [Source:MGI Symbol;Acc:MGI:98369]
ENSMUSG00000037152	0.0434	0.429	-2.35	0.208	0.939	1.59	0.215	0.379	-1.61	0.561	0.856	-1.23	0.355	0.94	1.52	Ndufc1	NADH dehydrogenase (ubiquinone) 1, subcomplex unknown, 1 [Source:MGI Symbol;Acc:MGI:1913627]
ENSMUSG00000023939	0.0434	0.429	-2.04	0.653	0.998	1.19	0.0682	0.173	-1.74	0.744	0.924	-1.09	0.174	0.918	1.92	Mrpl14	mitochondrial ribosomal protein L14 [Source:MGI Symbol;Acc:MGI:1333864]
ENSMUSG00000027692	0.00382	0.222	-1.54	0.174	0.923	-1.19	7.62e-05	0.00166	-1.77	0.135	0.52	-1.2	0.048	0.916	-1.36	Tnik	TRAF2 and NCK interacting kinase [Source:MGI Symbol;Acc:MGI:1916264]
ENSMUSG00000045636	0.0328	0.404	-1.44	0.501	0.994	-1.1	0.000499	0.00611	-1.77	0.382	0.76	-1.13	0.177	0.918	-1.27	Mtus1	mitochondrial tumor suppressor 1 [Source:MGI Symbol;Acc:MGI:2142572]
ENSMUSG00000021978	0.041	0.422	-1.29	0.000388	0.123	-1.49	4.66e-06	0.000241	-1.77	0.24	0.647	-1.13	0.0884	0.917	-1.24	Extl3	exostoses (multiple)-like 3 [Source:MGI Symbol;Acc:MGI:1860765]
ENSMUSG00000038886	0.0739	0.494	-1.31	0.537	0.994	-1.08	0.000142	0.00258	-1.77	0.586	0.868	1.07	0.671	0.964	-1.07	Man2a2	mannosidase 2, alpha 2 [Source:MGI Symbol;Acc:MGI:2150656]
ENSMUSG00000100078	0.0434	0.429	3.25	0.453	0.992	1.53	0.199	0.36	1.73	0.825	0.952	-1.12	1	1	-1	Gm6170	predicted gene 6170 [Source:MGI Symbol;Acc:MGI:3643368]
ENSMUSG00000022758	0.0858	0.509	-1.32	0.514	0.994	-1.1	0.000196	0.00325	-1.77	0.414	0.779	1.11	0.425	0.946	1.15	P2rx6	purinergic receptor P2X, ligand-gated ion channel, 6 [Source:MGI Symbol;Acc:MGI:1337113]
ENSMUSG00000057234	0.0435	0.429	-1.56	0.612	0.995	1.11	0.803	0.886	-1.05	0.127	0.505	-1.34	0.596	0.955	-1.14	Mettl15	methyltransferase like 15 [Source:MGI Symbol;Acc:MGI:1924144]
ENSMUSG00000021591	0.0982	0.525	-1.44	0.723	0.998	-1.08	0.00525	0.0293	-1.77	0.0411	0.319	-1.51	0.995	1	-1	Glrx	glutaredoxin [Source:MGI Symbol;Acc:MGI:2135625]
ENSMUSG00000038582	0.124	0.555	-1.25	0.851	0.998	1.02	6.97e-05	0.00156	-1.77	0.0184	0.231	-1.34	0.834	0.987	1.03	Pptc7	PTC7 protein phosphatase homolog (S. cerevisiae) [Source:MGI Symbol;Acc:MGI:2444593]
ENSMUSG00000029101	0.0435	0.429	1.56	0.31	0.984	-1.23	0.141	0.283	1.31	0.716	0.913	-1.08	0.393	0.944	-1.24	Rgs12	regulator of G-protein signaling 12 [Source:MGI Symbol;Acc:MGI:1918979]
ENSMUSG00000024440	0.144	0.582	-1.44	0.464	0.992	1.19	0.00639	0.0337	-1.77	0.146	0.535	-1.41	0.685	0.967	1.14	Pcdh12	protocadherin 12 [Source:MGI Symbol;Acc:MGI:1855700]
ENSMUSG00000050628	0.0436	0.429	-1.95	0.879	0.998	-1.05	0.167	0.32	-1.5	0.752	0.926	-1.09	0.622	0.957	-1.2	Ubald2	UBA-like domain containing 2 [Source:MGI Symbol;Acc:MGI:1914635]
ENSMUSG00000028465	0.0436	0.429	1.53	0.584	0.994	1.1	0.0351	0.11	1.52	0.835	0.955	1.04	0.606	0.956	1.12	Tln1	talin 1 [Source:MGI Symbol;Acc:MGI:1099832]
ENSMUSG00000020102	0.0436	0.429	2.45	0.393	0.992	1.35	0.0148	0.0604	2.69	0.463	0.808	1.34	0.283	0.928	1.74	Slc16a7	solute carrier family 16 (monocarboxylic acid transporters), member 7 [Source:MGI Symbol;Acc:MGI:1330284]
ENSMUSG00000030545	0.183	0.622	-1.33	0.417	0.992	-1.16	0.00399	0.0241	-1.77	0.792	0.94	1.05	0.927	0.995	1.02	Pex11a	peroxisomal biogenesis factor 11 alpha [Source:MGI Symbol;Acc:MGI:1338788]
ENSMUSG00000002968	0.248	0.675	-1.28	0.719	0.998	-1.07	0.00458	0.0266	-1.77	0.381	0.76	-1.17	0.971	0.998	1.01	Med25	mediator complex subunit 25 [Source:MGI Symbol;Acc:MGI:1922863]
ENSMUSG00000015806	0.248	0.675	-1.2	0.168	0.921	1.22	0.000122	0.00232	-1.77	0.398	0.772	1.11	0.505	0.952	1.12	Qdpr	quinoid dihydropteridine reductase [Source:MGI Symbol;Acc:MGI:97836]
ENSMUSG00000030357	0.253	0.679	-1.18	0.279	0.972	-1.14	5.24e-05	0.00129	-1.77	0.74	0.922	-1.04	0.831	0.987	-1.03	Fkbp4	FK506 binding protein 4 [Source:MGI Symbol;Acc:MGI:95543]
ENSMUSG00000032400	0.0438	0.43	3.31	0.69	0.998	-1.29	0.426	0.597	1.48	0.697	0.906	1.26	0.69	0.968	1.28	Zwilch	zwilch kinetochore protein [Source:MGI Symbol;Acc:MGI:1915264]
ENSMUSG00000058975	0.369	0.758	-1.18	0.141	0.886	-1.27	0.00129	0.0114	-1.77	0.623	0.881	-1.08	0.615	0.957	-1.1	Kcnc1	potassium voltage gated channel, Shaw-related subfamily, member 1 [Source:MGI Symbol;Acc:MGI:96667]
ENSMUSG00000021322	0.0439	0.43	2.82	0.289	0.976	-1.75	0.0129	0.055	3.59	0.0288	0.277	3.13	0.169	0.918	2.98	Aoah	acyloxyacyl hydrolase [Source:MGI Symbol;Acc:MGI:1350928]
ENSMUSG00000019961	0.044	0.431	1.34	0.0109	0.467	-1.38	0.837	0.907	1.03	0.0793	0.417	-1.24	0.253	0.923	-1.19	Tmpo	thymopoietin [Source:MGI Symbol;Acc:MGI:106920]
ENSMUSG00000081629	0.044	0.431	3.84	0.0481	0.711	3.37	0.439	0.61	1.66	0.869	0.963	-1.09	0.431	0.946	1.69	Eif3s6-ps1	eukaryotic translation initiation factor 3, subunit 6, pseudogene 1 [Source:MGI Symbol;Acc:MGI:103203]
ENSMUSG00000050552	0.0441	0.432	-1.51	0.621	0.997	-1.1	0.135	0.274	-1.31	0.213	0.616	-1.23	0.0846	0.917	1.51	Lamtor4	late endosomal/lysosomal adaptor, MAPK and MTOR activator 4 [Source:MGI Symbol;Acc:MGI:1913346]
ENSMUSG00000026207	0.407	0.777	-1.16	0.773	0.998	-1.05	0.00154	0.0129	-1.77	0.556	0.855	-1.1	0.451	0.948	-1.16	Speg	SPEG complex locus [Source:MGI Symbol;Acc:MGI:109282]
ENSMUSG00000017188	0.0443	0.433	-1.9	0.672	0.998	-1.13	0.0811	0.194	-1.63	0.46	0.806	-1.21	0.214	0.918	1.58	Coa3	cytochrome C oxidase assembly factor 3 [Source:MGI Symbol;Acc:MGI:1098757]
ENSMUSG00000021929	0.429	0.789	-1.18	0.18	0.926	-1.28	0.00434	0.0256	-1.77	0.0864	0.433	-1.36	0.407	0.945	-1.2	Kpna3	karyopherin (importin) alpha 3 [Source:MGI Symbol;Acc:MGI:1100863]
ENSMUSG00000039497	0.0443	0.433	1.66	0.375	0.991	1.24	0.0115	0.0506	1.8	0.0296	0.28	1.69	0.259	0.924	1.44	Dse	dermatan sulfate epimerase [Source:MGI Symbol;Acc:MGI:2443455]
ENSMUSG00000074282	0.0443	0.433	1.79	0.0788	0.791	1.67	0.989	0.994	1	0.75	0.926	-1.08	0.712	0.971	-1.12	Zfp94	zinc finger protein 94 [Source:MGI Symbol;Acc:MGI:107610]
ENSMUSG00000029776	0.0444	0.433	-1.36	0.939	0.998	-1.01	0.0215	0.0785	-1.39	0.00089	0.0544	-1.56	0.373	0.94	-1.15	Hibadh	3-hydroxyisobutyrate dehydrogenase [Source:MGI Symbol;Acc:MGI:1889802]
ENSMUSG00000087543	0.456	0.803	1.18	0.0934	0.814	-1.36	0.00204	0.0154	-1.77	0.206	0.609	-1.24	0.275	0.926	-1.27	Gm16576	predicted gene 16576 [Source:MGI Symbol;Acc:MGI:4414996]
ENSMUSG00000044442	0.554	0.852	-1.12	0.326	0.987	-1.2	0.000761	0.00806	-1.77	0.172	0.568	-1.25	0.645	0.96	-1.1	N6amt1	N-6 adenine-specific DNA methyltransferase 1 (putative) [Source:MGI Symbol;Acc:MGI:1915018]
ENSMUSG00000021772	0.635	0.883	-1.11	0.798	0.998	-1.05	0.00526	0.0293	-1.77	0.99	0.998	1	0.765	0.979	-1.07	Nkiras1	NFKB inhibitor interacting Ras-like protein 1 [Source:MGI Symbol;Acc:MGI:1916971]
ENSMUSG00000036792	0.859	0.964	-1.03	0.541	0.994	1.1	0.00106	0.0101	-1.77	0.0988	0.458	-1.31	0.763	0.979	1.06	Mbd5	methyl-CpG binding domain protein 5 [Source:MGI Symbol;Acc:MGI:2138934]
ENSMUSG00000031959	0.0449	0.437	-1.28	0.759	0.998	-1.03	0.0698	0.176	-1.23	0.994	0.999	-1	0.0424	0.91	-1.31	Wdr59	WD repeat domain 59 [Source:MGI Symbol;Acc:MGI:2442115]
ENSMUSG00000058076	0.0211	0.356	-1.64	0.604	0.995	-1.1	0.00513	0.0288	-1.76	0.223	0.63	-1.24	0.989	0.999	1	Sdhc	succinate dehydrogenase complex, subunit C, integral membrane protein [Source:MGI Symbol;Acc:MGI:1913302]
ENSMUSG00000096996	0.0451	0.438	2.86	0.393	0.992	1.48	0.0741	0.183	2.04	0.286	0.686	-1.42	0.517	0.952	-1.32	Gm26792	predicted gene, 26792 [Source:MGI Symbol;Acc:MGI:5477286]
ENSMUSG00000046179	0.0451	0.438	4.61	0.234	0.953	-2.52	0.0184	0.0705	4.58	0.0577	0.366	3.19	0.225	0.918	2.8	E2f8	E2F transcription factor 8 [Source:MGI Symbol;Acc:MGI:1922038]
ENSMUSG00000022244	0.0452	0.438	-1.31	0.823	0.998	-1.03	0.0799	0.192	-1.24	0.49	0.824	1.08	0.969	0.998	1.01	Amacr	alpha-methylacyl-CoA racemase [Source:MGI Symbol;Acc:MGI:1098273]
ENSMUSG00000054792	0.0452	0.438	-1.26	0.635	0.997	1.05	0.987	0.993	1	0.847	0.958	-1.02	0.305	0.934	-1.13	Klhl18	kelch-like 18 [Source:MGI Symbol;Acc:MGI:2143315]
ENSMUSG00000041168	0.0332	0.406	-1.46	0.703	0.998	-1.06	0.000942	0.00933	-1.76	0.518	0.837	-1.1	0.881	0.992	-1.03	Lonp1	lon peptidase 1, mitochondrial [Source:MGI Symbol;Acc:MGI:1921392]
ENSMUSG00000028931	0.0452	0.438	2.98	0.824	0.998	-1.12	0.206	0.367	1.8	0.0208	0.244	3.34	0.0435	0.91	5.29	Kcnab2	potassium voltage-gated channel, shaker-related subfamily, beta member 2 [Source:MGI Symbol;Acc:MGI:109239]
ENSMUSG00000084329	0.0453	0.438	-2.59	0.168	0.921	1.75	0.122	0.256	-1.84	0.328	0.717	-1.46	0.133	0.917	-2.02	Gm6733	predicted gene 6733 [Source:MGI Symbol;Acc:MGI:3645402]
ENSMUSG00000029500	0.0453	0.438	-1.58	0.874	0.998	1.03	0.145	0.29	-1.32	0.224	0.631	-1.26	0.348	0.939	1.28	Pgam5	phosphoglycerate mutase family member 5 [Source:MGI Symbol;Acc:MGI:1919792]
ENSMUSG00000026836	0.0797	0.501	-1.42	0.0785	0.79	-1.36	0.00236	0.0169	-1.76	0.876	0.965	-1.03	0.98	0.999	1.01	Acvr1	activin A receptor, type 1 [Source:MGI Symbol;Acc:MGI:87911]
ENSMUSG00000035601	0.0454	0.438	-1.39	0.205	0.937	1.21	0.544	0.698	-1.09	0.151	0.542	1.22	0.296	0.933	1.2	Trmt10b	tRNA methyltransferase 10B [Source:MGI Symbol;Acc:MGI:1917184]
ENSMUSG00000025499	0.0858	0.509	-1.49	0.492	0.993	1.15	0.0085	0.0411	-1.76	0.852	0.959	-1.04	0.0819	0.917	1.56	Hras	Harvey rat sarcoma virus oncogene [Source:MGI Symbol;Acc:MGI:96224]
ENSMUSG00000017677	0.0455	0.438	1.55	0.17	0.923	1.32	0.121	0.255	1.35	0.077	0.413	1.39	0.0557	0.917	1.64	Wsb1	WD repeat and SOCS box-containing 1 [Source:MGI Symbol;Acc:MGI:1926139]
ENSMUSG00000035121	0.0455	0.438	3.05	0.955	0.998	-1.03	0.0488	0.138	2.84	0.82	0.951	-1.13	0.589	0.955	-1.41	Neil2	nei like 2 (E. coli) [Source:MGI Symbol;Acc:MGI:2686058]
ENSMUSG00000041660	0.0456	0.439	-2.56	0.354	0.991	1.59	0.894	0.941	1.06	0.855	0.96	1.08	0.125	0.917	2.56	Bbox1	butyrobetaine (gamma), 2-oxoglutarate dioxygenase 1 (gamma-butyrobetaine hydroxylase) [Source:MGI Symbol;Acc:MGI:1891372]
ENSMUSG00000034377	0.102	0.526	-1.31	0.31	0.984	-1.16	0.000508	0.00618	-1.76	0.869	0.963	-1.02	0.692	0.968	1.07	Tulp4	tubby like protein 4 [Source:MGI Symbol;Acc:MGI:1916092]
ENSMUSG00000034640	0.261	0.686	1.28	0.174	0.923	-1.28	0.1	0.225	-1.37	2.77e-05	0.00629	-2.25	0.00337	0.407	-1.95	Tiparp	TCDD-inducible poly(ADP-ribose) polymerase [Source:MGI Symbol;Acc:MGI:2159210]
ENSMUSG00000028150	0.171	0.609	-1.35	0.949	0.998	1.01	0.002	0.0152	-1.89	7.04e-05	0.0123	-2.24	0.000144	0.105	-2.6	Rorc	RAR-related orphan receptor gamma [Source:MGI Symbol;Acc:MGI:104856]
ENSMUSG00000030725	0.266	0.691	-1.26	0.101	0.825	-1.35	0.00238	0.0169	-1.76	0.845	0.957	-1.03	0.152	0.918	1.39	Lipt2	lipoyl(octanoyl) transferase 2 (putative) [Source:MGI Symbol;Acc:MGI:1914414]
ENSMUSG00000032449	0.287	0.706	-1.21	0.533	0.994	-1.1	0.000824	0.00852	-1.76	0.558	0.855	-1.09	0.879	0.992	-1.03	Slc25a36	solute carrier family 25, member 36 [Source:MGI Symbol;Acc:MGI:1924909]
ENSMUSG00000004637	0.382	0.761	-1.17	0.577	0.994	1.09	0.000843	0.00868	-1.76	0.373	0.756	1.14	0.0651	0.917	-1.41	Wwox	WW domain-containing oxidoreductase [Source:MGI Symbol;Acc:MGI:1931237]
ENSMUSG00000020486	0.0459	0.44	-1.35	0.834	0.998	1.03	0.531	0.687	1.09	0.516	0.836	1.09	0.701	0.969	-1.07	2021-09-04	septin 4 [Source:MGI Symbol;Acc:MGI:1270156]
ENSMUSG00000030615	0.046	0.44	-1.8	0.999	1	1	0.0587	0.156	-1.67	0.964	0.991	-1.01	0.507	0.952	1.23	Tmem126a	transmembrane protein 126A [Source:MGI Symbol;Acc:MGI:1913521]
ENSMUSG00000074994	0.641	0.885	-1.08	0.679	0.998	1.07	0.000942	0.00933	-1.76	0.00366	0.107	-1.56	0.594	0.955	-1.1	Qser1	glutamine and serine rich 1 [Source:MGI Symbol;Acc:MGI:2138986]
ENSMUSG00000039377	0.046	0.44	1.82	0.504	0.994	-1.21	0.34	0.516	1.24	0.325	0.715	1.25	0.57	0.955	1.2	Hlx	H2.0-like homeobox [Source:MGI Symbol;Acc:MGI:96109]
ENSMUSG00000020321	0.00237	0.199	-1.89	0.561	0.994	1.11	0.00411	0.0246	-1.75	0.562	0.858	-1.1	0.668	0.964	1.09	Mdh1	malate dehydrogenase 1, NAD (soluble) [Source:MGI Symbol;Acc:MGI:97051]
ENSMUSG00000024246	0.0461	0.44	-1.6	0.19	0.929	1.35	0.39	0.566	1.2	0.745	0.924	-1.06	0.866	0.99	-1.05	Thumpd2	THUMP domain containing 2 [Source:MGI Symbol;Acc:MGI:1919417]
ENSMUSG00000015149	0.0461	0.44	-1.34	0.138	0.879	-1.21	0.0207	0.0766	-1.36	0.212	0.615	-1.16	0.884	0.992	1.02	Sirt2	sirtuin 2 [Source:MGI Symbol;Acc:MGI:1927664]
ENSMUSG00000031278	0.0462	0.44	-1.72	0.0131	0.497	-1.82	0.0123	0.0533	-1.89	0.154	0.547	-1.39	0.542	0.955	-1.19	Acsl4	acyl-CoA synthetase long-chain family member 4 [Source:MGI Symbol;Acc:MGI:1354713]
ENSMUSG00000103553	0.0462	0.441	2.09	0.3	0.984	1.44	0.673	0.797	-1.17	0.0227	0.253	-2.33	0.457	0.948	1.43	Gm38218	predicted gene, 38218 [Source:MGI Symbol;Acc:MGI:5611446]
ENSMUSG00000051246	0.0462	0.44	3.1	0.364	0.991	-1.65	0.596	0.74	1.31	0.97	0.992	-1.02	0.555	0.955	1.48	Msantd1	Myb/SANT-like DNA-binding domain containing 1 [Source:MGI Symbol;Acc:MGI:2684990]
ENSMUSG00000024570	0.0463	0.441	-1.75	0.412	0.992	-1.22	0.0227	0.0816	-1.72	0.281	0.679	-1.26	0.893	0.993	1.04	Rbfa	ribosome binding factor A [Source:MGI Symbol;Acc:MGI:1915981]
ENSMUSG00000030335	0.0463	0.441	-1.62	0.556	0.994	-1.13	0.0219	0.0796	-1.67	0.643	0.889	-1.1	0.316	0.936	1.3	Mrpl51	mitochondrial ribosomal protein L51 [Source:MGI Symbol;Acc:MGI:1913743]
ENSMUSG00000029464	0.0463	0.441	-1.55	0.202	0.936	-1.3	0.148	0.294	-1.32	0.0508	0.346	-1.44	0.615	0.957	1.14	Gpn3	GPN-loop GTPase 3 [Source:MGI Symbol;Acc:MGI:1289326]
ENSMUSG00000040557	0.0464	0.441	1.84	0.0143	0.512	2.02	0.0132	0.0561	1.87	0.577	0.863	1.18	0.528	0.955	1.27	Wbscr27	Williams Beuren syndrome chromosome region 27 (human) [Source:MGI Symbol;Acc:MGI:1933146]
ENSMUSG00000098146	0.0464	0.441	2.86	0.306	0.984	-1.52	0.788	0.878	1.12	0.928	0.981	1.03	0.00681	0.538	6.76	Gm26935	predicted gene, 26935 [Source:MGI Symbol;Acc:MGI:5504050]
ENSMUSG00000026112	0.0219	0.362	-1.44	0.0683	0.766	-1.29	0.000284	0.00417	-1.75	0.216	0.62	-1.18	0.087	0.917	-1.33	Coa5	cytochrome C oxidase assembly factor 5 [Source:MGI Symbol;Acc:MGI:1923428]
ENSMUSG00000035941	0.0544	0.457	-1.34	0.976	0.999	-1	0.000171	0.00293	-1.75	0.0241	0.259	-1.34	0.412	0.945	-1.14	Ibtk	inhibitor of Bruton agammaglobulinemia tyrosine kinase [Source:MGI Symbol;Acc:MGI:1918677]
ENSMUSG00000032083	0.0466	0.441	-4.29	0.358	0.991	1.9	0.0784	0.19	-2.89	0.809	0.949	-1.16	0.495	0.952	1.87	Apoa1	apolipoprotein A-I [Source:MGI Symbol;Acc:MGI:88049]
ENSMUSG00000037916	0.0608	0.47	-1.47	0.8	0.998	-1.05	0.0045	0.0262	-1.75	0.645	0.89	-1.08	0.855	0.989	1.04	Ndufv1	NADH dehydrogenase (ubiquinone) flavoprotein 1 [Source:MGI Symbol;Acc:MGI:107851]
ENSMUSG00000019080	0.0677	0.489	-1.33	0.341	0.99	-1.13	8.2e-05	0.00174	-1.75	0.588	0.868	-1.07	0.902	0.994	1.02	Mfsd3	major facilitator superfamily domain containing 3 [Source:MGI Symbol;Acc:MGI:1916822]
ENSMUSG00000059820	0.0466	0.441	1.55	0.312	0.986	-1.21	0.969	0.983	-1.01	0.812	0.949	1.04	0.935	0.996	-1.02	AU019823	expressed sequence AU019823 [Source:MGI Symbol;Acc:MGI:2143205]
ENSMUSG00000020386	0.0805	0.502	-1.46	0.727	0.998	1.07	0.00612	0.0326	-1.75	0.054	0.355	-1.42	0.681	0.966	-1.1	Sar1b	SAR1 gene homolog B (S. cerevisiae) [Source:MGI Symbol;Acc:MGI:1913647]
ENSMUSG00000025204	0.0468	0.443	-2.64	0.569	0.994	-1.27	0.0924	0.212	-2.14	0.631	0.884	-1.22	0.375	0.941	1.55	Ndufb8	NADH dehydrogenase (ubiquinone) 1 beta subcomplex 8 [Source:MGI Symbol;Acc:MGI:1914514]
ENSMUSG00000004268	0.0468	0.443	-1.42	0.325	0.987	-1.17	0.22	0.384	-1.21	0.316	0.707	-1.16	0.395	0.944	1.18	Emg1	EMG1 nucleolar protein homolog (S. cerevisiae) [Source:MGI Symbol;Acc:MGI:1315195]
ENSMUSG00000007036	0.0928	0.52	-1.35	0.611	0.995	-1.08	0.00112	0.0104	-1.75	0.352	0.739	-1.15	0.15	0.918	-1.31	Abhd16a	abhydrolase domain containing 16A [Source:MGI Symbol;Acc:MGI:99476]
ENSMUSG00000027255	0.113	0.543	-1.25	0.567	0.994	1.07	6.25e-05	0.00146	-1.75	0.775	0.934	1.03	0.245	0.923	-1.19	Arfgap2	ADP-ribosylation factor GTPase activating protein 2 [Source:MGI Symbol;Acc:MGI:1924288]
ENSMUSG00000003824	0.047	0.443	2.65	0.749	0.998	1.16	0.129	0.265	1.88	0.266	0.668	-1.57	0.615	0.957	-1.27	Syce2	synaptonemal complex central element protein 2 [Source:MGI Symbol;Acc:MGI:1919096]
ENSMUSG00000091264	0.156	0.592	-1.28	0.33	0.987	-1.16	0.000938	0.00931	-1.75	0.435	0.794	-1.12	0.383	0.942	-1.17	Smim13	small integral membrane protein 13 [Source:MGI Symbol;Acc:MGI:2652854]
ENSMUSG00000020024	0.0471	0.443	-1.34	0.653	0.998	1.06	0.0389	0.117	-1.32	0.812	0.949	-1.03	0.849	0.988	1.03	Cep83	centrosomal protein 83 [Source:MGI Symbol;Acc:MGI:1924298]
ENSMUSG00000033124	0.169	0.607	-1.2	0.0217	0.593	-1.32	2.75e-05	0.000875	-1.75	0.00134	0.0652	-1.46	0.0057	0.509	-1.49	Atg9a	autophagy related 9A [Source:MGI Symbol;Acc:MGI:2138446]
ENSMUSG00000029530	0.0472	0.444	-2.14	0.667	0.998	-1.27	0.723	0.834	1.24	0.422	0.783	-1.57	0.661	0.963	-1.36	Ccr9	chemokine (C-C motif) receptor 9 [Source:MGI Symbol;Acc:MGI:1341902]
ENSMUSG00000020821	0.177	0.613	-1.25	0.287	0.974	-1.17	0.000628	0.00715	-1.75	0.208	0.611	-1.19	0.154	0.918	-1.28	Kif1c	kinesin family member 1C [Source:MGI Symbol;Acc:MGI:1098260]
ENSMUSG00000029577	0.313	0.722	-1.14	0.332	0.987	-1.12	3.72e-05	0.00105	-1.75	0.0102	0.178	-1.35	0.273	0.925	-1.17	Ube3b	ubiquitin protein ligase E3B [Source:MGI Symbol;Acc:MGI:1891295]
ENSMUSG00000060675	0.952	0.991	-1.01	0.373	0.991	1.17	0.796	0.882	-1.05	2.3e-05	0.00539	-2.19	0.0986	0.917	-1.42	Pla2g16	phospholipase A2, group XVI [Source:MGI Symbol;Acc:MGI:2179715]
ENSMUSG00000024074	0.00648	0.265	-1.62	0.315	0.986	-1.16	6.61e-05	0.00151	-1.98	2.49e-06	0.0012	-2.17	0.00172	0.302	-1.82	Crim1	cysteine rich transmembrane BMP regulator 1 (chordin like) [Source:MGI Symbol;Acc:MGI:1354756]
ENSMUSG00000000355	0.0474	0.445	-1.53	0.171	0.923	1.31	0.426	0.597	-1.17	0.443	0.798	-1.15	0.922	0.995	1.02	Mcts1	malignant T cell amplified sequence 1 [Source:MGI Symbol;Acc:MGI:1916245]
ENSMUSG00000105962	0.614	0.876	1.12	0.227	0.951	1.26	0.00684	0.0353	-1.75	0.696	0.906	1.08	0.115	0.917	1.64	Gm42432	predicted gene 42432 [Source:MGI Symbol;Acc:MGI:5662569]
ENSMUSG00000038179	0.0474	0.445	4.48	0.955	0.998	1.05	0.049	0.138	3.32	0.0111	0.184	6.42	0.183	0.918	3.5	Slamf7	SLAM family member 7 [Source:MGI Symbol;Acc:MGI:1922595]
ENSMUSG00000041881	0.0475	0.445	-1.74	0.918	0.998	1.03	0.214	0.377	-1.35	0.419	0.782	-1.2	0.309	0.934	1.38	Ndufa7	NADH dehydrogenase (ubiquinone) 1 alpha subcomplex, 7 (B14.5a) [Source:MGI Symbol;Acc:MGI:1913666]
ENSMUSG00000022847	0.758	0.932	-1.06	0.703	0.998	-1.07	0.00116	0.0107	-1.75	0.261	0.664	1.19	0.00419	0.436	2.04	Thpo	thrombopoietin [Source:MGI Symbol;Acc:MGI:101875]
ENSMUSG00000054843	0.0475	0.445	-1.36	0.92	0.998	1.01	0.0377	0.115	-1.34	0.755	0.928	-1.04	0.208	0.918	-1.22	Atrnl1	attractin like 1 [Source:MGI Symbol;Acc:MGI:2147749]
ENSMUSG00000065037	0.0475	0.445	2.58	0.0693	0.767	1.93	0.704	0.82	1.12	0.39	0.767	-1.33	0.863	0.99	1.09	Rn7sk	RNA, 7SK, nuclear [Source:MGI Symbol;Acc:MGI:103186]
ENSMUSG00000037787	0.0476	0.445	-1.49	0.491	0.993	-1.13	0.084	0.199	-1.36	0.121	0.493	-1.29	0.634	0.959	1.11	Apopt1	apoptogenic, mitochondrial 1 [Source:MGI Symbol;Acc:MGI:1915270]
ENSMUSG00000033458	0.847	0.96	-1.03	0.865	0.998	1.03	0.000235	0.00367	-1.75	0.978	0.995	1	0.474	0.949	-1.13	Fan1	FANCD2/FANCI-associated nuclease 1 [Source:MGI Symbol;Acc:MGI:3045266]
ENSMUSG00000022848	0.00299	0.208	-1.51	0.0287	0.627	-1.3	3.7e-05	0.00105	-1.74	0.226	0.633	-1.15	0.506	0.952	-1.1	Dirc2	disrupted in renal carcinoma 2 (human) [Source:MGI Symbol;Acc:MGI:2387188]
ENSMUSG00000021112	0.0477	0.445	-1.32	0.78	0.998	1.03	0.141	0.283	-1.21	0.0329	0.292	-1.3	0.824	0.987	1.03	Mpp5	membrane protein, palmitoylated 5 (MAGUK p55 subfamily member 5) [Source:MGI Symbol;Acc:MGI:1927339]
ENSMUSG00000034789	0.0478	0.445	-1.48	0.622	0.997	1.09	0.0802	0.193	-1.37	0.791	0.94	1.04	0.553	0.955	1.13	Rab24	RAB24, member RAS oncogene family [Source:MGI Symbol;Acc:MGI:105065]
ENSMUSG00000048731	0.0478	0.445	-1.47	0.384	0.991	1.16	0.0857	0.201	-1.33	0.296	0.694	1.18	0.528	0.955	-1.13	Ggnbp1	gametogenetin binding protein 1 [Source:MGI Symbol;Acc:MGI:3055306]
ENSMUSG00000021666	0.00516	0.244	-1.48	0.014	0.51	-1.35	4.55e-05	0.0012	-1.74	0.0488	0.341	-1.26	0.47	0.948	-1.11	Gfm2	G elongation factor, mitochondrial 2 [Source:MGI Symbol;Acc:MGI:2444783]
ENSMUSG00000040048	0.0479	0.445	-1.83	0.875	0.998	1.04	0.0711	0.178	-1.66	0.878	0.966	-1.04	0.397	0.944	1.31	Ndufb10	NADH dehydrogenase (ubiquinone) 1 beta subcomplex, 10 [Source:MGI Symbol;Acc:MGI:1915592]
ENSMUSG00000023034	0.0479	0.445	-1.68	0.0287	0.626	-1.67	0.0511	0.142	-1.62	0.206	0.609	-1.33	0.0849	0.917	-1.61	Nr4a1	nuclear receptor subfamily 4, group A, member 1 [Source:MGI Symbol;Acc:MGI:1352454]
ENSMUSG00000032047	0.0175	0.339	-1.43	0.0478	0.711	-1.3	0.000165	0.00286	-1.74	0.0632	0.381	-1.26	0.597	0.955	-1.08	Acat1	acetyl-Coenzyme A acetyltransferase 1 [Source:MGI Symbol;Acc:MGI:87870]
ENSMUSG00000022265	0.0448	0.436	-1.34	0.274	0.968	-1.15	9.37e-05	0.0019	-1.74	0.046	0.335	-1.28	0.0936	0.917	-1.29	Ank	progressive ankylosis [Source:MGI Symbol;Acc:MGI:3045421]
ENSMUSG00000024211	0.0479	0.445	2.83	0.286	0.974	-1.59	0.534	0.69	-1.3	0.0293	0.279	2.86	0.0448	0.91	-2.84	Grm8	glutamate receptor, metabotropic 8 [Source:MGI Symbol;Acc:MGI:1351345]
ENSMUSG00000057406	0.048	0.446	1.39	0.3	0.984	1.16	0.0809	0.194	1.3	0.0623	0.378	1.3	0.135	0.917	1.32	Whsc1	Wolf-Hirschhorn syndrome candidate 1 (human) [Source:MGI Symbol;Acc:MGI:1276574]
ENSMUSG00000027667	0.0481	0.446	-1.37	0.944	0.998	-1.01	0.053	0.146	-1.32	0.19	0.591	-1.19	0.364	0.94	1.16	Zfp639	zinc finger protein 639 [Source:MGI Symbol;Acc:MGI:1915028]
ENSMUSG00000047264	0.0496	0.449	-1.43	0.809	0.998	1.04	0.00076	0.00805	-1.74	0.214	0.618	-1.2	0.806	0.985	-1.05	Zfp358	zinc finger protein 358 [Source:MGI Symbol;Acc:MGI:2153740]
ENSMUSG00000022634	0.0482	0.446	-1.5	0.636	0.997	1.09	0.0275	0.0925	-1.5	0.803	0.947	-1.04	0.48	0.95	1.18	Yaf2	YY1 associated factor 2 [Source:MGI Symbol;Acc:MGI:1914307]
ENSMUSG00000030729	0.00258	0.199	-1.94	0.08	0.795	-1.38	2.51e-05	0.000821	-2.49	0.000158	0.0197	-2.16	0.626	0.959	-1.12	Pgm2l1	phosphoglucomutase 2-like 1 [Source:MGI Symbol;Acc:MGI:1918224]
ENSMUSG00000041765	0.0593	0.468	-1.28	0.0276	0.626	-1.29	1.22e-05	0.000495	-1.74	0.0494	0.343	-1.24	0.909	0.994	-1.02	Ubac2	ubiquitin associated domain containing 2 [Source:MGI Symbol;Acc:MGI:1916139]
ENSMUSG00000059518	0.0483	0.446	-1.72	0.529	0.994	-1.17	0.112	0.243	-1.46	0.238	0.645	-1.29	0.639	0.96	1.15	Znhit1	zinc finger, HIT domain containing 1 [Source:MGI Symbol;Acc:MGI:1917353]
ENSMUSG00000054342	0.0483	0.447	3.9	0.864	0.998	1.13	0.111	0.241	2.72	0.0253	0.263	3.65	0.2	0.918	3.33	Kcnn4	potassium intermediate/small conductance calcium-activated channel, subfamily N, member 4 [Source:MGI Symbol;Acc:MGI:1277957]
ENSMUSG00000051316	0.0484	0.447	-1.46	0.293	0.978	1.21	0.484	0.648	-1.13	0.047	0.337	-1.41	0.886	0.992	1.03	Taf7	TAF7 RNA polymerase II, TATA box binding protein (TBP)-associated factor [Source:MGI Symbol;Acc:MGI:1346348]
ENSMUSG00000032279	0.0634	0.478	-1.36	0.471	0.992	1.11	0.000663	0.00739	-1.74	0.992	0.999	1	0.871	0.99	-1.03	Idh3a	isocitrate dehydrogenase 3 (NAD+) alpha [Source:MGI Symbol;Acc:MGI:1915084]
ENSMUSG00000010048	0.0652	0.483	-1.37	0.498	0.993	-1.11	0.000593	0.00688	-1.74	0.535	0.844	-1.09	0.789	0.982	1.05	Ifrd2	interferon-related developmental regulator 2 [Source:MGI Symbol;Acc:MGI:1316708]
ENSMUSG00000033227	0.0485	0.447	2.74	0.137	0.878	-1.86	0.13	0.268	1.84	0.619	0.879	1.24	0.111	0.917	2.77	Wnt6	wingless-type MMTV integration site family, member 6 [Source:MGI Symbol;Acc:MGI:98960]
ENSMUSG00000081058	0.0486	0.447	-2.73	0.692	0.998	-1.16	0.909	0.949	-1.04	0.213	0.616	-1.54	0.491	0.951	1.38	Hist2h3c2	histone cluster 2, H3c2 [Source:MGI Symbol;Acc:MGI:2448357]
ENSMUSG00000018566	0.0891	0.514	-1.32	0.169	0.922	-1.21	0.000541	0.00646	-1.74	0.357	0.743	-1.13	0.724	0.973	-1.06	Slc2a4	solute carrier family 2 (facilitated glucose transporter), member 4 [Source:MGI Symbol;Acc:MGI:95758]
ENSMUSG00000032030	0.106	0.533	-1.33	0.479	0.992	-1.11	0.00108	0.0102	-1.74	0.133	0.517	-1.25	0.993	0.999	-1	Cul5	cullin 5 [Source:MGI Symbol;Acc:MGI:1922967]
ENSMUSG00000029146	0.0486	0.447	1.26	0.429	0.992	1.08	0.069	0.175	1.22	0.507	0.832	1.07	0.252	0.923	-1.15	Snx17	sorting nexin 17 [Source:MGI Symbol;Acc:MGI:2387801]
ENSMUSG00000006456	0.0486	0.447	1.44	0.342	0.99	-1.17	0.704	0.82	1.06	0.239	0.646	1.18	0.085	0.917	1.47	Rbm14	RNA binding motif protein 14 [Source:MGI Symbol;Acc:MGI:1929092]
ENSMUSG00000047604	0.183	0.621	-1.36	0.281	0.974	-1.26	0.0107	0.0486	-1.74	0.923	0.979	1.02	0.831	0.987	1.05	Frat2	frequently rearranged in advanced T cell lymphomas 2 [Source:MGI Symbol;Acc:MGI:2673967]
ENSMUSG00000006678	0.0487	0.447	1.84	0.376	0.991	1.3	0.0511	0.142	1.83	0.376	0.757	1.32	0.978	0.999	-1.01	Pola1	polymerase (DNA directed), alpha 1 [Source:MGI Symbol;Acc:MGI:99660]
ENSMUSG00000016624	0.0488	0.447	-1.98	0.521	0.994	1.23	0.132	0.27	-1.5	0.416	0.781	-1.27	0.89	0.992	-1.05	Phf21b	PHD finger protein 21B [Source:MGI Symbol;Acc:MGI:2443812]
ENSMUSG00000025962	0.298	0.713	-1.19	0.591	0.994	1.08	0.000471	0.00586	-1.74	0.0322	0.29	-1.36	0.193	0.918	-1.26	Fastkd2	FAST kinase domains 2 [Source:MGI Symbol;Acc:MGI:1922869]
ENSMUSG00000032409	0.049	0.449	-1.38	0.23	0.951	1.19	0.798	0.883	-1.04	0.642	0.888	-1.07	0.0395	0.91	1.54	Atr	ataxia telangiectasia and Rad3 related [Source:MGI Symbol;Acc:MGI:108028]
ENSMUSG00000000561	0.049	0.449	1.43	0.521	0.994	1.1	0.891	0.94	-1.02	0.585	0.868	-1.08	0.86	0.99	1.04	Wdr77	WD repeat domain 77 [Source:MGI Symbol;Acc:MGI:1917715]
ENSMUSG00000040907	0.049	0.449	4.5	0.838	0.998	-1.16	0.0249	0.0866	6.43	0.00387	0.109	11.5	0.769	0.98	1.23	Atp1a3	ATPase, Na+/K+ transporting, alpha 3 polypeptide [Source:MGI Symbol;Acc:MGI:88107]
ENSMUSG00000066894	0.0491	0.449	1.52	0.405	0.992	1.18	0.126	0.262	1.3	0.0216	0.249	-1.54	0.0999	0.917	-1.5	Vsig10	V-set and immunoglobulin domain containing 10 [Source:MGI Symbol;Acc:MGI:2448533]
ENSMUSG00000030105	0.309	0.72	-1.18	0.299	0.984	-1.16	0.0004	0.00527	-1.74	0.742	0.923	-1.05	0.89	0.992	1.02	Arl8b	ADP-ribosylation factor-like 8B [Source:MGI Symbol;Acc:MGI:1914416]
ENSMUSG00000097660	0.0492	0.449	-2.02	0.187	0.928	1.6	0.0567	0.153	-1.93	0.887	0.969	1.05	0.932	0.995	1.04	Gm26762	predicted gene, 26762 [Source:MGI Symbol;Acc:MGI:5477256]
ENSMUSG00000043411	0.0492	0.449	1.22	0.299	0.984	1.09	0.286	0.458	1.1	0.54	0.845	1.05	0.572	0.955	-1.06	Usp48	ubiquitin specific peptidase 48 [Source:MGI Symbol;Acc:MGI:2158502]
ENSMUSG00000040236	0.311	0.72	-1.19	0.314	0.986	-1.16	0.00047	0.00586	-1.74	0.105	0.467	-1.26	0.312	0.935	-1.2	Trappc5	trafficking protein particle complex 5 [Source:MGI Symbol;Acc:MGI:1913932]
ENSMUSG00000028607	0.000275	0.0955	-1.77	0.325	0.987	1.14	0.000154	0.00273	-1.73	0.63	0.883	-1.06	0.957	0.997	1.01	Cpt2	carnitine palmitoyltransferase 2 [Source:MGI Symbol;Acc:MGI:109176]
ENSMUSG00000026457	0.00931	0.292	-1.39	0.0702	0.767	-1.22	1.49e-05	0.00057	-1.73	0.0179	0.229	-1.29	0.325	0.938	-1.13	Adipor1	adiponectin receptor 1 [Source:MGI Symbol;Acc:MGI:1919924]
ENSMUSG00000029309	0.0494	0.449	-1.38	0.678	0.998	-1.06	0.444	0.614	1.12	0.0235	0.256	-1.37	0.247	0.923	-1.22	Sparcl1	SPARC-like 1 [Source:MGI Symbol;Acc:MGI:108110]
ENSMUSG00000034254	0.022	0.362	-1.37	0.262	0.963	-1.14	5.11e-05	0.00126	-1.73	0.732	0.918	-1.04	0.518	0.952	1.1	Agpat1	1-acylglycerol-3-phosphate O-acyltransferase 1 (lysophosphatidic acid acyltransferase, alpha) [Source:MGI Symbol;Acc:MGI:1932075]
ENSMUSG00000033220	0.0494	0.449	3.08	0.222	0.949	2	0.0151	0.0612	3.46	0.00363	0.107	6.09	0.217	0.918	2.7	Rac2	RAS-related C3 botulinum substrate 2 [Source:MGI Symbol;Acc:MGI:97846]
ENSMUSG00000078713	0.0495	0.449	-1.54	0.769	0.998	1.06	0.389	0.564	-1.19	0.617	0.879	-1.1	0.737	0.977	-1.08	Tomm5	translocase of outer mitochondrial membrane 5 homolog (yeast) [Source:MGI Symbol;Acc:MGI:1915762]
ENSMUSG00000022749	0.0495	0.449	1.29	0.323	0.986	1.12	0.609	0.75	-1.06	0.718	0.913	1.04	0.623	0.958	1.07	Tbc1d23	TBC1 domain family, member 23 [Source:MGI Symbol;Acc:MGI:1914831]
ENSMUSG00000034820	0.0495	0.449	1.3	0.834	0.998	-1.02	0.26	0.431	1.14	0.171	0.566	1.16	0.541	0.955	1.09	Cpsf7	cleavage and polyadenylation specific factor 7 [Source:MGI Symbol;Acc:MGI:1917826]
ENSMUSG00000039987	0.0375	0.415	-1.38	0.595	0.995	-1.07	0.000273	0.00405	-1.73	0.00725	0.151	-1.43	0.15	0.918	-1.26	Phtf2	putative homeodomain transcription factor 2 [Source:MGI Symbol;Acc:MGI:1916020]
ENSMUSG00000022110	0.0496	0.449	-1.47	0.259	0.963	-1.21	0.0283	0.0942	-1.49	0.404	0.773	-1.14	0.366	0.94	-1.2	Sucla2	succinate-Coenzyme A ligase, ADP-forming, beta subunit [Source:MGI Symbol;Acc:MGI:1306775]
ENSMUSG00000048920	0.0381	0.417	-1.44	0.278	0.97	-1.18	0.00103	0.00994	-1.73	0.248	0.654	-1.18	0.471	0.948	-1.14	Fkrp	fukutin related protein [Source:MGI Symbol;Acc:MGI:2447586]
ENSMUSG00000037049	0.0555	0.46	-1.25	0.273	0.968	-1.12	2.23e-06	0.000149	-1.73	0.482	0.819	-1.07	0.71	0.971	1.05	Smpd1	sphingomyelin phosphodiesterase 1, acid lysosomal [Source:MGI Symbol;Acc:MGI:98325]
ENSMUSG00000027009	0.0497	0.449	-2.11	0.0615	0.745	-2.02	0.0789	0.191	-1.85	0.0494	0.343	-1.97	0.982	0.999	-1.01	Itga4	integrin alpha 4 [Source:MGI Symbol;Acc:MGI:96603]
ENSMUSG00000005882	0.0796	0.501	-1.28	0.664	0.998	1.05	6.04e-05	0.00142	-1.73	0.274	0.674	-1.14	0.517	0.952	-1.1	Uqcc1	ubiquinol-cytochrome c reductase complex assembly factor 1 [Source:MGI Symbol;Acc:MGI:1929472]
ENSMUSG00000030265	0.0497	0.449	1.46	0.32	0.986	1.18	0.527	0.685	1.11	0.664	0.895	-1.07	0.603	0.956	1.11	Kras	v-Ki-ras2 Kirsten rat sarcoma viral oncogene homolog [Source:MGI Symbol;Acc:MGI:96680]
ENSMUSG00000098404	0.0497	0.449	2.69	0.557	0.994	1.25	0.0493	0.139	2.42	0.967	0.991	-1.02	0.0428	0.91	-2.25	Mrip-ps	Mom radiation induced polyposis, pseudogene [Source:MGI Symbol;Acc:MGI:3645947]
ENSMUSG00000024548	0.0951	0.522	-1.4	0.689	0.998	1.07	0.00361	0.0225	-1.73	0.0609	0.376	-1.41	0.476	0.949	-1.18	Setbp1	SET binding protein 1 [Source:MGI Symbol;Acc:MGI:1933199]
ENSMUSG00000034023	0.0498	0.449	2.48	0.309	0.984	1.58	0.116	0.249	1.88	0.123	0.498	1.92	0.571	0.955	1.35	Fancd2	Fanconi anemia, complementation group D2 [Source:MGI Symbol;Acc:MGI:2448480]
ENSMUSG00000028140	0.0499	0.449	-1.47	0.741	0.998	-1.06	0.151	0.298	-1.29	0.652	0.892	-1.08	0.949	0.996	1.01	Mrpl9	mitochondrial ribosomal protein L9 [Source:MGI Symbol;Acc:MGI:2137211]
ENSMUSG00000030302	0.0499	0.449	3.37	0.603	0.995	-1.3	0.075	0.184	2.75	0.509	0.833	1.36	0.0681	0.917	3.92	Atp2b2	ATPase, Ca++ transporting, plasma membrane 2 [Source:MGI Symbol;Acc:MGI:105368]
ENSMUSG00000015944	0.29	0.708	1.14	0.0193	0.564	1.29	0.202	0.364	-1.15	7.68e-10	1.75e-06	-2.16	1.74e-11	1.39e-07	-3.01	Gatsl2	GATS protein-like 2 [Source:MGI Symbol;Acc:MGI:1933384]
ENSMUSG00000043613	0.0501	0.451	4.33	0.376	0.991	1.97	0.0144	0.0595	6.86	0.00742	0.153	6.7	0.979	0.999	1.02	Mmp3	matrix metallopeptidase 3 [Source:MGI Symbol;Acc:MGI:97010]
ENSMUSG00000022292	0.223	0.656	-1.24	0.754	0.998	-1.05	0.000967	0.00951	-1.73	0.138	0.524	-1.25	0.482	0.95	-1.14	Rrm2b	ribonucleotide reductase M2 B (TP53 inducible) [Source:MGI Symbol;Acc:MGI:2155865]
ENSMUSG00000042524	0.242	0.674	-1.2	0.00844	0.428	-1.45	0.000378	0.00507	-1.73	0.115	0.485	-1.23	0.053	0.917	-1.38	Sun2	Sad1 and UNC84 domain containing 2 [Source:MGI Symbol;Acc:MGI:2443011]
ENSMUSG00000035112	0.0502	0.451	2.24	0.453	0.992	1.32	0.213	0.376	1.6	0.615	0.879	1.18	0.122	0.917	2.35	Wnk4	WNK lysine deficient protein kinase 4 [Source:MGI Symbol;Acc:MGI:1917097]
ENSMUSG00000023030	0.29	0.709	-1.18	0.204	0.937	-1.19	0.000247	0.00378	-1.73	0.501	0.829	-1.09	0.414	0.945	-1.14	Slc11a2	solute carrier family 11 (proton-coupled divalent metal ion transporters), member 2 [Source:MGI Symbol;Acc:MGI:1345279]
ENSMUSG00000062995	0.0503	0.451	-1.62	0.97	0.999	1.01	0.77	0.865	-1.07	0.307	0.702	-1.27	0.213	0.918	1.51	Ica1	islet cell autoantigen 1 [Source:MGI Symbol;Acc:MGI:96391]
ENSMUSG00000020988	0.299	0.713	-1.16	0.69	0.998	1.05	9.25e-05	0.00188	-1.73	0.00949	0.172	-1.39	0.855	0.989	1.03	L2hgdh	L-2-hydroxyglutarate dehydrogenase [Source:MGI Symbol;Acc:MGI:2384968]
ENSMUSG00000021589	0.321	0.725	-1.23	0.661	0.998	-1.08	0.00563	0.0307	-1.73	0.0983	0.457	-1.35	0.435	0.946	-1.2	Rhobtb3	Rho-related BTB domain containing 3 [Source:MGI Symbol;Acc:MGI:1920546]
ENSMUSG00000045930	0.0504	0.451	-1.55	0.755	0.998	-1.07	0.664	0.792	-1.1	0.558	0.855	-1.14	0.78	0.981	-1.08	Clec14a	C-type lectin domain family 14, member a [Source:MGI Symbol;Acc:MGI:1914114]
ENSMUSG00000020471	0.385	0.762	-1.21	0.831	0.998	1.05	0.00521	0.0291	-1.73	0.704	0.909	1.07	0.98	0.999	-1.01	Pold2	polymerase (DNA directed), delta 2, regulatory subunit [Source:MGI Symbol;Acc:MGI:1097163]
ENSMUSG00000042460	0.0505	0.451	-1.57	0.706	0.998	1.07	0.0735	0.182	-1.5	0.407	0.775	-1.19	0.363	0.94	1.29	C1galt1	core 1 synthase, glycoprotein-N-acetylgalactosamine 3-beta-galactosyltransferase, 1 [Source:MGI Symbol;Acc:MGI:2151071]
ENSMUSG00000029162	0.394	0.769	-1.24	0.0735	0.772	1.52	0.0096	0.0447	-1.73	0.279	0.678	-1.21	0.149	0.918	1.54	Khk	ketohexokinase [Source:MGI Symbol;Acc:MGI:1096353]
ENSMUSG00000021669	0.4	0.772	-1.16	0.413	0.992	-1.13	0.00104	0.01	-1.73	0.0606	0.375	-1.32	0.732	0.976	1.06	Col4a3bp	collagen, type IV, alpha 3 (Goodpasture antigen) binding protein [Source:MGI Symbol;Acc:MGI:1915268]
ENSMUSG00000034593	0.0505	0.451	1.8	0.664	0.998	-1.12	0.145	0.288	1.49	0.101	0.462	1.55	0.405	0.945	1.33	Myo5a	myosin VA [Source:MGI Symbol;Acc:MGI:105976]
ENSMUSG00000022905	0.404	0.775	-1.16	0.138	0.879	-1.26	0.00155	0.0129	-1.73	0.0279	0.273	-1.4	0.326	0.938	-1.2	Kpna1	karyopherin (importin) alpha 1 [Source:MGI Symbol;Acc:MGI:103560]
ENSMUSG00000104344	0.442	0.797	-1.19	0.842	0.998	1.04	0.00748	0.0376	-1.73	0.136	0.521	-1.32	0.906	0.994	1.03	Gm38077	predicted gene, 38077 [Source:MGI Symbol;Acc:MGI:5611305]
ENSMUSG00000021893	0.711	0.913	-1.08	0.0886	0.812	-1.35	0.00371	0.0229	-1.73	0.0267	0.269	-1.46	0.809	0.986	1.05	Capn7	calpain 7 [Source:MGI Symbol;Acc:MGI:1338030]
ENSMUSG00000039089	0.0507	0.452	1.36	0.814	0.998	1.03	0.9	0.945	1.02	0.41	0.777	-1.11	0.713	0.971	1.06	L3mbtl3	l(3)mbt-like 3 (Drosophila) [Source:MGI Symbol;Acc:MGI:2143628]
ENSMUSG00000035776	0.00336	0.221	-1.37	0.417	0.992	-1.08	7.37e-07	7.13e-05	-1.72	0.439	0.796	-1.07	0.321	0.936	-1.11	Cd99l2	CD99 antigen-like 2 [Source:MGI Symbol;Acc:MGI:2177151]
ENSMUSG00000030785	0.0509	0.452	-1.64	0.928	0.998	-1.02	0.0242	0.0851	-1.71	0.479	0.817	-1.16	0.361	0.94	1.27	Cox6a2	cytochrome c oxidase subunit VIa polypeptide 2 [Source:MGI Symbol;Acc:MGI:104649]
ENSMUSG00000059355	0.0509	0.452	-1.46	0.489	0.993	1.13	0.167	0.319	-1.26	0.53	0.842	1.11	0.654	0.962	1.1	Wdr83os	WD repeat domain 83 opposite strand [Source:MGI Symbol;Acc:MGI:3041257]
ENSMUSG00000057469	0.00432	0.23	-1.47	0.255	0.963	-1.14	3.52e-05	0.00102	-1.72	0.004	0.111	-1.39	0.351	0.94	-1.13	E2f6	E2F transcription factor 6 [Source:MGI Symbol;Acc:MGI:1354159]
ENSMUSG00000037376	0.051	0.452	1.44	0.154	0.9	1.27	0.0524	0.145	1.38	0.879	0.967	1.02	0.48	0.95	-1.15	Trmt6	tRNA methyltransferase 6 [Source:MGI Symbol;Acc:MGI:1914176]
ENSMUSG00000051495	0.051	0.452	1.44	0.756	0.998	1.05	0.207	0.369	1.23	0.566	0.86	1.09	0.471	0.948	1.16	Irf2bp2	interferon regulatory factor 2 binding protein 2 [Source:MGI Symbol;Acc:MGI:2443921]
ENSMUSG00000105748	0.051	0.452	2.9	0.283	0.974	-1.59	0.653	0.783	1.23	0.209	0.613	1.86	0.193	0.918	2.34	Gm43088	predicted gene 43088 [Source:MGI Symbol;Acc:MGI:5663225]
ENSMUSG00000025175	0.0141	0.329	-1.64	0.0403	0.681	1.48	0.00234	0.0167	-1.72	0.594	0.871	-1.09	0.0919	0.917	1.55	Fn3k	fructosamine 3 kinase [Source:MGI Symbol;Acc:MGI:1926834]
ENSMUSG00000014418	0.0511	0.453	-1.33	0.333	0.987	-1.13	0.103	0.228	-1.24	0.93	0.982	1.01	0.418	0.946	-1.13	Hps5	Hermansky-Pudlak syndrome 5 homolog (human) [Source:MGI Symbol;Acc:MGI:2180307]
ENSMUSG00000034485	0.0142	0.331	-1.55	0.35	0.99	-1.15	0.00152	0.0127	-1.72	0.159	0.555	-1.23	0.538	0.955	-1.12	Uaca	uveal autoantigen with coiled-coil domains and ankyrin repeats [Source:MGI Symbol;Acc:MGI:1919815]
ENSMUSG00000021318	0.0512	0.453	1.65	0.854	0.998	1.05	0.14	0.282	1.43	0.368	0.753	1.23	0.861	0.99	1.05	Gli3	GLI-Kruppel family member GLI3 [Source:MGI Symbol;Acc:MGI:95729]
ENSMUSG00000050010	0.0513	0.453	-1.7	0.0849	0.808	-1.58	0.131	0.269	-1.45	0.00744	0.153	-2.14	0.0391	0.91	-1.89	Shisa3	shisa family member 3 [Source:MGI Symbol;Acc:MGI:3041225]
ENSMUSG00000031521	0.0513	0.453	-1.57	0.962	0.998	1.01	0.114	0.245	-1.37	0.443	0.798	-1.17	0.83	0.987	1.06	Aga	aspartylglucosaminidase [Source:MGI Symbol;Acc:MGI:104873]
ENSMUSG00000020183	0.0513	0.453	-1.53	0.0748	0.776	-1.41	0.683	0.805	-1.07	0.0185	0.232	-1.53	0.2	0.918	-1.33	Cpm	carboxypeptidase M [Source:MGI Symbol;Acc:MGI:1917824]
ENSMUSG00000061838	0.0237	0.37	-1.4	0.288	0.975	-1.14	0.000104	0.00205	-1.72	0.0746	0.407	-1.24	0.639	0.96	-1.07	Suclg2	succinate-Coenzyme A ligase, GDP-forming, beta subunit [Source:MGI Symbol;Acc:MGI:1306824]
ENSMUSG00000057924	0.0513	0.453	2.72	0.0827	0.802	2.03	0.885	0.937	1.06	0.694	0.905	-1.16	0.225	0.918	1.97	Gm10033	predicted gene 10033 [Source:MGI Symbol;Acc:MGI:3642803]
ENSMUSG00000000320	0.0514	0.453	-1.81	0.201	0.935	1.45	0.0191	0.0722	-2.06	0.00251	0.0916	2.1	0.544	0.955	1.22	Alox12	arachidonate 12-lipoxygenase [Source:MGI Symbol;Acc:MGI:87998]
ENSMUSG00000024067	0.0514	0.453	-1.67	0.929	0.998	1.02	0.962	0.979	1.01	0.541	0.845	1.15	0.302	0.934	1.38	Dpy30	dpy-30 homolog (C. elegans) [Source:MGI Symbol;Acc:MGI:1913560]
ENSMUSG00000038068	0.629	0.881	-1.09	0.000908	0.177	-1.69	0.0282	0.0941	-1.42	3.19e-06	0.00136	-2.15	0.000389	0.176	-1.96	Rnf144b	ring finger protein 144B [Source:MGI Symbol;Acc:MGI:2384986]
ENSMUSG00000020865	0.0514	0.453	3.13	0.605	0.995	1.36	0.0124	0.0534	4.61	0.0186	0.233	3.91	0.254	0.923	2.4	Abcc3	ATP-binding cassette, sub-family C (CFTR/MRP), member 3 [Source:MGI Symbol;Acc:MGI:1923658]
ENSMUSG00000074971	0.0515	0.453	-1.61	0.00244	0.26	-1.99	0.594	0.738	-1.11	0.472	0.813	-1.14	0.0676	0.917	-1.53	Fibin	fin bud initiation factor homolog (zebrafish) [Source:MGI Symbol;Acc:MGI:1914856]
ENSMUSG00000058267	0.0516	0.453	-1.58	0.249	0.961	1.29	0.957	0.977	-1.01	0.809	0.949	-1.05	0.141	0.917	1.49	Mrps14	mitochondrial ribosomal protein S14 [Source:MGI Symbol;Acc:MGI:1928141]
ENSMUSG00000000085	0.0694	0.491	-1.33	0.645	0.997	-1.06	0.000237	0.0037	-1.72	0.318	0.709	-1.14	0.342	0.938	-1.16	Scmh1	sex comb on midleg homolog 1 [Source:MGI Symbol;Acc:MGI:1352762]
ENSMUSG00000043131	0.0516	0.453	1.64	0.748	0.998	-1.07	0.0181	0.0696	1.74	0.725	0.916	1.08	0.504	0.952	1.2	Mob1a	MOB kinase activator 1A [Source:MGI Symbol;Acc:MGI:2442631]
ENSMUSG00000056602	0.073	0.494	-1.37	0.0671	0.764	-1.33	0.00141	0.0122	-1.72	0.682	0.901	-1.06	0.781	0.981	-1.05	Fry	furry homolog (Drosophila) [Source:MGI Symbol;Acc:MGI:2443895]
ENSMUSG00000027288	0.077	0.498	-1.24	0.839	0.998	1.02	1.55e-05	0.000591	-1.72	0.00651	0.144	-1.34	0.201	0.918	-1.18	Zfp106	zinc finger protein 106 [Source:MGI Symbol;Acc:MGI:1270153]
ENSMUSG00000029804	0.0794	0.501	-1.34	0.144	0.891	-1.24	0.000744	0.00794	-1.72	0.261	0.664	-1.17	0.0938	0.917	-1.34	Herc3	hect domain and RLD 3 [Source:MGI Symbol;Acc:MGI:1921248]
ENSMUSG00000053329	0.0868	0.511	-1.46	0.296	0.982	-1.22	0.00867	0.0418	-1.72	0.114	0.482	-1.34	0.834	0.987	-1.05	D10Jhu81e	DNA segment, Chr 10, Johns Hopkins University 81 expressed [Source:MGI Symbol;Acc:MGI:1351861]
ENSMUSG00000016510	0.0517	0.453	1.91	0.207	0.938	1.4	0.0695	0.175	-1.57	0.748	0.925	1.09	0.64	0.96	1.2	Mtif3	mitochondrial translational initiation factor 3 [Source:MGI Symbol;Acc:MGI:1923616]
ENSMUSG00000030672	0.0518	0.453	-1.98	0.548	0.994	-1.2	0.0214	0.0782	-2.12	0.831	0.954	-1.06	0.378	0.941	1.37	Mylpf	myosin light chain, phosphorylatable, fast skeletal muscle [Source:MGI Symbol;Acc:MGI:97273]
ENSMUSG00000056947	0.0518	0.453	-1.94	0.844	0.998	1.07	0.665	0.792	-1.17	0.0714	0.4	-1.86	0.906	0.994	1.06	Mab21l1	mab-21-like 1 (C. elegans) [Source:MGI Symbol;Acc:MGI:1333773]
ENSMUSG00000022519	0.087	0.511	-1.25	0.354	0.991	-1.11	4.67e-05	0.00121	-1.72	0.788	0.939	1.03	0.521	0.952	-1.09	Srl	sarcalumenin [Source:MGI Symbol;Acc:MGI:2146620]
ENSMUSG00000038375	0.0992	0.525	-1.32	0.533	0.994	-1.1	0.000919	0.00919	-1.72	0.626	0.882	-1.07	0.265	0.925	-1.21	Trp53inp2	transformation related protein 53 inducible nuclear protein 2 [Source:MGI Symbol;Acc:MGI:1915978]
ENSMUSG00000097039	0.0518	0.453	1.65	0.709	0.998	1.1	0.0139	0.0578	1.78	0.124	0.501	1.45	0.249	0.923	1.45	Pvt1	plasmacytoma variant translocation 1 [Source:MGI Symbol;Acc:MGI:97824]
ENSMUSG00000036737	0.125	0.556	-1.24	0.0497	0.714	-1.27	8.28e-05	0.00175	-1.72	0.153	0.546	-1.18	0.173	0.918	-1.22	Oxsr1	oxidative-stress responsive 1 [Source:MGI Symbol;Acc:MGI:1917378]
ENSMUSG00000083534	0.0519	0.453	-3.66	0.545	0.994	-1.35	0.0285	0.0948	-3.23	0.393	0.768	1.53	0.467	0.948	1.7	H2-M6-ps	histocompatibility 2, M region locus 6, pseudogene [Source:MGI Symbol;Acc:MGI:95918]
ENSMUSG00000026273	0.0519	0.453	-1.58	0.109	0.843	1.45	0.312	0.486	-1.24	0.997	0.999	1	0.34	0.938	1.31	Mterf4	mitochondrial transcription termination factor 4 [Source:MGI Symbol;Acc:MGI:1918355]
ENSMUSG00000042642	0.125	0.556	-1.23	0.911	0.998	1.01	2.67e-05	0.000857	-1.72	0.815	0.95	-1.03	0.608	0.956	1.07	Flad1	RFad1, flavin adenine dinucleotide synthetase, homolog (yeast) [Source:MGI Symbol;Acc:MGI:2443030]
ENSMUSG00000041415	0.128	0.56	-1.24	0.033	0.648	-1.31	0.000127	0.00238	-1.72	0.00239	0.0894	-1.47	0.0875	0.917	-1.3	Dicer1	dicer 1, ribonuclease type III [Source:MGI Symbol;Acc:MGI:2177178]
ENSMUSG00000030301	0.163	0.597	-1.27	0.311	0.985	1.17	0.00126	0.0113	-1.72	0.146	0.535	-1.24	0.269	0.925	-1.22	Ccdc91	coiled-coil domain containing 91 [Source:MGI Symbol;Acc:MGI:1914265]
ENSMUSG00000036561	0.217	0.65	-1.19	0.0872	0.809	-1.24	0.000101	0.00201	-1.72	0.22	0.626	-1.16	0.0837	0.917	-1.29	Ppp6r2	protein phosphatase 6, regulatory subunit 2 [Source:MGI Symbol;Acc:MGI:1918724]
ENSMUSG00000051346	0.254	0.68	-1.23	0.891	0.998	-1.02	0.000997	0.0097	-1.72	0.501	0.829	-1.1	0.415	0.946	-1.16	Spryd4	SPRY domain containing 4 [Source:MGI Symbol;Acc:MGI:1913951]
ENSMUSG00000050505	0.0521	0.453	2.25	0.281	0.974	-1.54	0.234	0.4	1.68	0.333	0.722	-1.48	0.292	0.93	-1.61	Pcdh20	protocadherin 20 [Source:MGI Symbol;Acc:MGI:2443376]
ENSMUSG00000040694	0.0522	0.454	-1.59	0.7	0.998	-1.08	0.124	0.259	-1.4	0.37	0.754	1.2	0.472	0.949	1.19	Apobec2	apolipoprotein B mRNA editing enzyme, catalytic polypeptide 2 [Source:MGI Symbol;Acc:MGI:1343178]
ENSMUSG00000062981	0.0523	0.454	-2.36	0.476	0.992	-1.32	0.0368	0.113	-2.32	0.346	0.735	-1.41	0.346	0.939	1.58	Mrpl42	mitochondrial ribosomal protein L42 [Source:MGI Symbol;Acc:MGI:1333774]
ENSMUSG00000045691	0.27	0.694	-1.2	0.766	0.998	1.04	0.000334	0.00467	-1.72	0.466	0.81	-1.1	0.302	0.934	-1.2	Thtpa	thiamine triphosphatase [Source:MGI Symbol;Acc:MGI:2446078]
ENSMUSG00000021684	0.273	0.696	-1.21	0.43	0.992	1.13	0.000823	0.00852	-1.72	0.0267	0.269	-1.41	0.206	0.918	-1.26	Pde8b	phosphodiesterase 8B [Source:MGI Symbol;Acc:MGI:2443999]
ENSMUSG00000048616	0.0524	0.454	-1.91	0.302	0.984	-1.39	0.183	0.339	-1.48	0.277	0.677	1.37	0.466	0.948	1.34	Nog	noggin [Source:MGI Symbol;Acc:MGI:104327]
ENSMUSG00000007570	0.0524	0.454	1.44	0.525	0.994	1.11	0.449	0.618	-1.12	0.866	0.962	1.02	0.248	0.923	-1.24	Fance	Fanconi anemia, complementation group E [Source:MGI Symbol;Acc:MGI:1920025]
ENSMUSG00000022337	0.0525	0.454	-1.32	0.591	0.994	1.07	0.0216	0.0788	-1.36	0.992	0.999	-1	0.597	0.955	1.08	Emc2	ER membrane protein complex subunit 2 [Source:MGI Symbol;Acc:MGI:1913986]
ENSMUSG00000035004	0.0525	0.454	2.51	0.324	0.986	1.72	0.0204	0.0758	3.05	0.0394	0.314	2.78	0.231	0.918	2.14	Igsf6	immunoglobulin superfamily, member 6 [Source:MGI Symbol;Acc:MGI:1891393]
ENSMUSG00000033257	0.3	0.714	-1.22	0.408	0.992	-1.15	0.00241	0.0171	-1.72	0.362	0.747	-1.16	0.751	0.979	-1.07	Ttll4	tubulin tyrosine ligase-like family, member 4 [Source:MGI Symbol;Acc:MGI:1914784]
ENSMUSG00000016386	0.0527	0.454	-2.11	0.679	0.998	1.14	0.0201	0.0748	-2.13	0.0739	0.405	-1.69	0.208	0.918	1.84	Mpped2	metallophosphoesterase domain containing 2 [Source:MGI Symbol;Acc:MGI:1924265]
ENSMUSG00000042010	0.35	0.744	-1.22	0.483	0.993	-1.14	0.00769	0.0383	-1.72	0.0292	0.278	-1.49	0.105	0.917	-1.43	Acacb	acetyl-Coenzyme A carboxylase beta [Source:MGI Symbol;Acc:MGI:2140940]
ENSMUSG00000070643	0.357	0.749	-1.21	0.0025	0.265	-1.71	0.00216	0.0159	-1.72	0.00866	0.165	-1.55	2.51e-06	0.004	-2.78	Sox13	SRY (sex determining region Y)-box 13 [Source:MGI Symbol;Acc:MGI:98361]
ENSMUSG00000022667	0.0527	0.454	3.1	0.76	0.998	1.2	0.0116	0.0511	4.62	0.18	0.578	2.3	0.106	0.917	4.56	Cd200r1	CD200 receptor 1 [Source:MGI Symbol;Acc:MGI:1889024]
ENSMUSG00000057400	0.0528	0.454	-3.89	0.451	0.992	-1.62	0.648	0.78	-1.34	0.162	0.558	-2.18	0.375	0.941	2.04	Ces1c	carboxylesterase 1C [Source:MGI Symbol;Acc:MGI:95420]
ENSMUSG00000069919	0.0528	0.454	-2.61	0.859	0.998	1.08	0.409	0.581	-1.45	0.517	0.837	-1.32	0.777	0.98	1.18	Hba-a1	hemoglobin alpha, adult chain 1 [Source:MGI Symbol;Acc:MGI:96015]
ENSMUSG00000026544	0.0528	0.454	-1.6	0.718	0.998	1.08	0.0451	0.13	-1.57	0.893	0.97	-1.03	0.512	0.952	1.18	Dusp23	dual specificity phosphatase 23 [Source:MGI Symbol;Acc:MGI:1915690]
ENSMUSG00000039100	0.36	0.752	-1.13	0.849	0.998	-1.02	6.84e-05	0.00154	-1.72	0.00605	0.139	-1.39	0.203	0.918	-1.2	2021-03-06	membrane-associated ring finger (C3HC4) 6 [Source:MGI Symbol;Acc:MGI:2442773]
ENSMUSG00000068823	0.365	0.755	-1.16	0.665	0.998	-1.06	0.000649	0.00729	-1.72	0.057	0.364	-1.3	0.469	0.948	-1.13	Csde1	cold shock domain containing E1, RNA binding [Source:MGI Symbol;Acc:MGI:92356]
ENSMUSG00000002658	0.0528	0.454	1.41	0.603	0.995	1.08	0.921	0.957	1.01	0.377	0.758	1.13	0.658	0.963	1.09	Gtf2f1	general transcription factor IIF, polypeptide 1 [Source:MGI Symbol;Acc:MGI:1923848]
ENSMUSG00000054027	0.976	0.997	-1.01	0.016	0.523	-1.44	0.00109	0.0103	-1.72	0.00319	0.102	-1.55	0.0462	0.91	-1.43	Nt5dc3	5'-nucleotidase domain containing 3 [Source:MGI Symbol;Acc:MGI:3513266]
ENSMUSG00000021273	0.0482	0.446	-1.44	0.504	0.994	-1.11	0.0262	0.0898	-1.46	1.57e-05	0.00425	-2.13	0.000194	0.125	-2.2	Fdft1	farnesyl diphosphate farnesyl transferase 1 [Source:MGI Symbol;Acc:MGI:102706]
ENSMUSG00000070343	0.0529	0.454	-3.06	0.0641	0.754	2.77	0.271	0.443	1.77	0.187	0.588	1.9	0.956	0.997	1.04	Gm10288	predicted gene 10288 [Source:MGI Symbol;Acc:MGI:3704227]
ENSMUSG00000003438	0.0529	0.454	-1.58	0.865	0.998	-1.04	0.148	0.294	-1.36	0.845	0.957	-1.04	0.128	0.917	1.49	Timm50	translocase of inner mitochondrial membrane 50 [Source:MGI Symbol;Acc:MGI:1913775]
ENSMUSG00000046410	0.0529	0.454	1.82	0.884	0.998	1.04	0.026	0.0893	1.76	0.0438	0.328	1.7	0.423	0.946	1.3	Kcnk6	potassium inwardly-rectifying channel, subfamily K, member 6 [Source:MGI Symbol;Acc:MGI:1891291]
ENSMUSG00000097823	0.0529	0.454	3.28	0.906	0.998	1.07	0.0395	0.119	2.94	0.248	0.654	-1.75	0.226	0.918	-2.05	Gm16701	predicted gene, 16701 [Source:MGI Symbol;Acc:MGI:4439625]
ENSMUSG00000038462	0.00786	0.278	-1.55	0.956	0.998	1.01	0.00069	0.00757	-1.71	0.531	0.842	-1.09	0.213	0.918	1.23	Uqcrfs1	ubiquinol-cytochrome c reductase, Rieske iron-sulfur polypeptide 1 [Source:MGI Symbol;Acc:MGI:1913944]
ENSMUSG00000033790	0.053	0.454	1.3	0.108	0.841	1.21	0.175	0.33	-1.17	0.484	0.82	-1.08	0.683	0.967	1.06	Tubgcp5	tubulin, gamma complex associated protein 5 [Source:MGI Symbol;Acc:MGI:2178836]
ENSMUSG00000088769	0.053	0.454	2.7	0.217	0.944	1.7	0.19	0.349	1.81	0.251	0.656	1.73	0.79	0.982	-1.15	Gm22637	predicted gene, 22637 [Source:MGI Symbol;Acc:MGI:5452414]
ENSMUSG00000020627	0.0531	0.454	-1.44	0.916	0.998	-1.02	0.0215	0.0784	-1.47	0.544	0.848	1.1	0.0149	0.699	-1.65	Klhl29	kelch-like 29 [Source:MGI Symbol;Acc:MGI:2683857]
ENSMUSG00000026429	0.0531	0.454	2.03	0.144	0.89	-1.53	0.82	0.897	1.06	0.154	0.547	-1.41	0.995	1	1	Ube2t	ubiquitin-conjugating enzyme E2T (putative) [Source:MGI Symbol;Acc:MGI:1914446]
ENSMUSG00000062352	0.0532	0.454	-1.43	0.734	0.998	1.06	0.589	0.734	-1.09	0.254	0.659	-1.19	0.668	0.963	1.1	Itgb1bp1	integrin beta 1 binding protein 1 [Source:MGI Symbol;Acc:MGI:1306802]
ENSMUSG00000026492	0.0107	0.306	-1.59	0.646	0.998	-1.08	0.000996	0.0097	-1.71	0.0403	0.317	-1.36	0.353	0.94	1.2	Tfb2m	transcription factor B2, mitochondrial [Source:MGI Symbol;Acc:MGI:107937]
ENSMUSG00000073985	0.0533	0.454	-1.77	0.957	0.998	-1.02	0.0198	0.0742	-1.88	0.0779	0.415	1.54	0.512	0.952	-1.23	Gm10602	predicted gene 10602 [Source:MGI Symbol;Acc:MGI:3708759]
ENSMUSG00000079317	0.0533	0.454	-1.5	0.584	0.994	-1.11	0.0136	0.057	-1.6	0.696	0.906	-1.07	0.349	0.939	-1.24	Trappc2	trafficking protein particle complex 2 [Source:MGI Symbol;Acc:MGI:1913476]
ENSMUSG00000035759	0.0533	0.454	2.31	0.971	0.999	-1.01	0.476	0.642	1.26	0.928	0.981	1.03	0.863	0.99	-1.08	Bbs10	Bardet-Biedl syndrome 10 (human) [Source:MGI Symbol;Acc:MGI:1919019]
ENSMUSG00000021124	0.0534	0.455	-1.54	0.897	0.998	1.03	0.312	0.487	-1.23	0.73	0.918	1.07	0.361	0.94	1.24	Vti1b	vesicle transport through interaction with t-SNAREs 1B [Source:MGI Symbol;Acc:MGI:1855688]
ENSMUSG00000031818	0.0535	0.456	-1.9	0.969	0.999	-1.01	0.0588	0.156	-1.8	0.64	0.888	-1.14	0.12	0.917	1.71	Cox4i1	cytochrome c oxidase subunit IV isoform 1 [Source:MGI Symbol;Acc:MGI:88473]
ENSMUSG00000021027	0.0146	0.331	-1.45	0.903	0.998	-1.02	0.000244	0.00375	-1.71	0.139	0.525	-1.21	0.777	0.98	-1.05	Ralgapa1	Ral GTPase activating protein, alpha subunit 1 [Source:MGI Symbol;Acc:MGI:1931050]
ENSMUSG00000039640	0.0537	0.456	-1.74	0.903	0.998	-1.03	0.0197	0.0738	-1.85	0.712	0.911	-1.09	0.535	0.955	1.21	Mrpl12	mitochondrial ribosomal protein L12 [Source:MGI Symbol;Acc:MGI:1926273]
ENSMUSG00000055128	0.0204	0.356	-1.49	0.306	0.984	-1.16	0.000774	0.00816	-1.71	0.0241	0.259	-1.39	0.996	1	1	Cgrrf1	cell growth regulator with ring finger domain 1 [Source:MGI Symbol;Acc:MGI:1916368]
ENSMUSG00000018986	0.0537	0.456	2.14	0.874	0.998	1.05	0.97	0.983	-1.01	0.0475	0.338	-1.92	0.63	0.959	-1.22	Slfn3	schlafen 3 [Source:MGI Symbol;Acc:MGI:1329005]
ENSMUSG00000031967	0.0252	0.376	-1.41	0.458	0.992	-1.1	0.000249	0.00379	-1.71	0.0703	0.398	-1.26	0.133	0.917	-1.27	Afg3l1	AFG3-like AAA ATPase 1 [Source:MGI Symbol;Acc:MGI:1928277]
ENSMUSG00000002342	0.0303	0.393	-1.38	0.568	0.994	-1.08	0.000223	0.00357	-1.71	0.87	0.964	-1.02	0.609	0.956	-1.08	Tmem161a	transmembrane protein 161A [Source:MGI Symbol;Acc:MGI:2384577]
ENSMUSG00000079477	0.0388	0.419	-1.38	0.193	0.931	-1.19	0.000397	0.00524	-1.71	0.241	0.648	-1.16	0.646	0.96	-1.08	Rab7	RAB7, member RAS oncogene family [Source:MGI Symbol;Acc:MGI:105068]
ENSMUSG00000049233	0.0539	0.456	-2.29	0.0134	0.504	-2.79	0.0754	0.185	-1.96	0.203	0.604	-1.61	0.778	0.98	-1.15	Apoo-ps	apolipoprotein O, pseudogene [Source:MGI Symbol;Acc:MGI:3649039]
ENSMUSG00000020439	0.0423	0.428	-1.47	0.0916	0.813	-1.32	0.00292	0.0195	-1.71	0.796	0.943	-1.04	0.99	0.999	-1	Smtn	smoothelin [Source:MGI Symbol;Acc:MGI:1354727]
ENSMUSG00000039474	0.0539	0.456	-1.33	0.698	0.998	-1.05	0.0405	0.121	-1.33	0.822	0.952	1.03	0.541	0.955	-1.1	Wfs1	Wolfram syndrome 1 homolog (human) [Source:MGI Symbol;Acc:MGI:1328355]
ENSMUSG00000100455	0.0539	0.456	1.63	0.0422	0.692	1.53	0.0417	0.124	1.57	0.675	0.898	1.1	0.691	0.968	1.12	Gm29170	predicted gene 29170 [Source:MGI Symbol;Acc:MGI:5579876]
ENSMUSG00000024481	0.0539	0.456	1.83	0.543	0.994	-1.16	0.59	0.735	1.14	0.156	0.55	-1.4	0.0589	0.917	-1.68	Lvrn	laeverin [Source:MGI Symbol;Acc:MGI:1921824]
ENSMUSG00000002797	0.0427	0.428	-1.62	0.989	0.999	-1	0.00892	0.0424	-1.71	0.0568	0.364	-1.49	0.575	0.955	1.17	Ggct	gamma-glutamyl cyclotransferase [Source:MGI Symbol;Acc:MGI:95700]
ENSMUSG00000040584	0.0542	0.457	-1.39	0.712	0.998	-1.06	0.354	0.531	-1.15	0.015	0.211	-1.5	0.187	0.918	-1.3	Abcb1a	ATP-binding cassette, sub-family B (MDR/TAP), member 1A [Source:MGI Symbol;Acc:MGI:97570]
ENSMUSG00000044792	0.0838	0.507	-1.37	0.248	0.959	-1.2	0.00217	0.0159	-1.71	0.0696	0.396	-1.33	0.722	0.973	-1.07	Isca1	iron-sulfur cluster assembly 1 homolog (S. cerevisiae) [Source:MGI Symbol;Acc:MGI:1916296]
ENSMUSG00000027227	0.0543	0.457	-1.31	0.533	0.994	1.08	0.0206	0.0765	-1.35	0.00993	0.176	-1.37	0.155	0.918	-1.24	Sord	sorbitol dehydrogenase [Source:MGI Symbol;Acc:MGI:98266]
ENSMUSG00000043140	0.0871	0.512	-1.28	0.742	0.998	1.04	6.36e-05	0.00147	-1.71	0.151	0.542	-1.19	0.619	0.957	-1.08	Tmem186	transmembrane protein 186 [Source:MGI Symbol;Acc:MGI:1913940]
ENSMUSG00000042675	0.425	0.787	-1.19	0.709	0.998	-1.07	0.593	0.738	1.11	0.000168	0.0206	-2.12	0.0301	0.857	-1.7	Ypel3	yippee-like 3 (Drosophila) [Source:MGI Symbol;Acc:MGI:1913340]
ENSMUSG00000021243	0.0544	0.457	-1.82	0.433	0.992	1.31	0.935	0.965	-1.02	0.793	0.941	1.07	0.578	0.955	1.25	Fcf1	FCF1 small subunit (SSU) processome component homolog (S. cerevisiae) [Source:MGI Symbol;Acc:MGI:1920986]
ENSMUSG00000062683	0.104	0.531	-1.32	0.0695	0.767	-1.32	0.000729	0.00785	-1.71	0.438	0.796	-1.11	0.987	0.999	1	Atp5g2	ATP synthase, H+ transporting, mitochondrial F0 complex, subunit C2 (subunit 9) [Source:MGI Symbol;Acc:MGI:1915192]
ENSMUSG00000023156	0.127	0.558	-1.27	0.443	0.992	1.11	0.000262	0.00391	-1.71	0.906	0.975	-1.02	0.763	0.979	1.05	Rpp14	ribonuclease P 14 subunit [Source:MGI Symbol;Acc:MGI:1914303]
ENSMUSG00000032688	0.0544	0.457	1.73	0.855	0.998	-1.04	0.329	0.504	1.25	0.00217	0.0857	-2.05	0.187	0.918	-1.45	Malt1	MALT1 paracaspase [Source:MGI Symbol;Acc:MGI:2445027]
ENSMUSG00000041406	0.0544	0.457	2.37	0.702	0.998	1.19	0.347	0.523	1.44	0.639	0.888	1.2	0.891	0.992	-1.07	BC055324	cDNA sequence BC055324 [Source:MGI Symbol;Acc:MGI:3590554]
ENSMUSG00000033186	0.176	0.612	-1.33	0.774	0.998	-1.05	0.00729	0.037	-1.71	0.0814	0.423	-1.37	0.215	0.918	-1.32	Mzt1	mitotic spindle organizing protein 1 [Source:MGI Symbol;Acc:MGI:1924039]
ENSMUSG00000043257	0.0545	0.457	-1.27	0.623	0.997	-1.06	0.152	0.298	-1.17	0.743	0.924	1.03	0.98	0.999	-1	Pigv	phosphatidylinositol glycan anchor biosynthesis, class V [Source:MGI Symbol;Acc:MGI:2442480]
ENSMUSG00000030199	0.0545	0.457	1.41	0.804	0.998	1.04	0.0126	0.0542	1.49	0.108	0.472	1.26	0.0666	0.917	1.45	Etv6	ets variant 6 [Source:MGI Symbol;Acc:MGI:109336]
ENSMUSG00000097333	0.0545	0.457	1.77	0.102	0.827	1.49	0.114	0.246	1.47	0.57	0.86	-1.14	0.205	0.918	1.54	Zfp87	zinc finger protein 87 [Source:MGI Symbol;Acc:MGI:107768]
ENSMUSG00000020877	0.204	0.64	-1.32	0.103	0.828	-1.35	0.00555	0.0304	-1.71	0.429	0.788	-1.15	0.592	0.955	-1.13	Scrn2	secernin 2 [Source:MGI Symbol;Acc:MGI:1343092]
ENSMUSG00000065564	0.0547	0.457	-3.18	0.998	1	-1	0.105	0.231	2.61	0.686	0.903	1.22	0.694	0.968	-1.27	Mirlet7b	microRNA let7b [Source:MGI Symbol;Acc:MGI:2676794]
ENSMUSG00000004455	0.0547	0.457	-1.31	0.257	0.963	-1.15	0.0164	0.0651	-1.37	0.744	0.924	1.04	0.886	0.992	1.02	Ppp1cc	protein phosphatase 1, catalytic subunit, gamma isoform [Source:MGI Symbol;Acc:MGI:104872]
ENSMUSG00000035877	0.0547	0.457	1.3	0.574	0.994	-1.07	0.63	0.766	1.06	0.116	0.486	-1.2	0.0698	0.917	-1.3	Zhx3	zinc fingers and homeoboxes 3 [Source:MGI Symbol;Acc:MGI:2444772]
ENSMUSG00000036499	0.215	0.648	-1.27	0.406	0.992	-1.15	0.00388	0.0237	-1.71	0.11	0.475	-1.31	0.745	0.977	1.07	Eea1	early endosome antigen 1 [Source:MGI Symbol;Acc:MGI:2442192]
ENSMUSG00000035168	0.0547	0.457	1.39	0.0447	0.703	1.36	0.069	0.175	1.32	0.341	0.729	1.15	0.681	0.966	1.08	Tanc1	tetratricopeptide repeat, ankyrin repeat and coiled-coil containing 1 [Source:MGI Symbol;Acc:MGI:1914110]
ENSMUSG00000061607	0.0547	0.457	1.52	0.191	0.93	-1.29	0.0755	0.185	1.4	0.264	0.666	1.22	0.565	0.955	1.15	Mdc1	mediator of DNA damage checkpoint 1 [Source:MGI Symbol;Acc:MGI:3525201]
ENSMUSG00000034659	0.26	0.686	-1.19	0.291	0.978	-1.16	0.000548	0.00649	-1.71	0.208	0.612	-1.18	0.447	0.948	-1.13	Tmem109	transmembrane protein 109 [Source:MGI Symbol;Acc:MGI:1915789]
ENSMUSG00000025193	0.334	0.733	-1.18	0.858	0.998	-1.03	0.000432	0.00555	-1.71	0.582	0.866	-1.08	0.888	0.992	-1.02	Cutc	cutC copper transporter homolog (E.coli) [Source:MGI Symbol;Acc:MGI:1913638]
ENSMUSG00000031561	0.453	0.802	-1.15	0.382	0.991	-1.15	0.00174	0.0139	-1.71	0.00228	0.0878	-1.65	0.0946	0.917	-1.4	Tenm3	teneurin transmembrane protein 3 [Source:MGI Symbol;Acc:MGI:1345183]
ENSMUSG00000029560	0.0548	0.458	1.4	0.332	0.987	-1.17	0.0393	0.118	1.38	0.0198	0.239	1.41	0.588	0.955	1.11	Snx8	sorting nexin 8 [Source:MGI Symbol;Acc:MGI:2443816]
ENSMUSG00000028411	0.526	0.839	-1.11	0.249	0.961	-1.19	0.000548	0.00649	-1.71	0.842	0.957	-1.03	0.51	0.952	-1.13	Aptx	aprataxin [Source:MGI Symbol;Acc:MGI:1913658]
ENSMUSG00000083899	0.0549	0.458	3.27	0.846	0.998	-1.1	0.483	0.647	1.43	0.48	0.818	1.4	0.259	0.924	2.26	Gm12346	predicted gene 12346 [Source:MGI Symbol;Acc:MGI:3649810]
ENSMUSG00000097317	0.055	0.458	1.51	0.131	0.871	1.32	0.528	0.685	1.11	0.814	0.95	-1.04	0.897	0.994	-1.03	Gm17281	predicted gene, 17281 [Source:MGI Symbol;Acc:MGI:4936915]
ENSMUSG00000025384	0.583	0.863	-1.09	0.112	0.85	-1.24	0.000307	0.00443	-1.71	0.0941	0.449	-1.25	0.106	0.917	-1.3	Faap100	Fanconi anemia core complex associated protein 100 [Source:MGI Symbol;Acc:MGI:1919135]
ENSMUSG00000024750	0.988	0.999	-1	0.887	0.998	1.02	0.0991	0.223	-1.29	1.84e-06	0.000983	-2.12	0.00188	0.312	-1.76	Zfand5	zinc finger, AN1-type domain 5 [Source:MGI Symbol;Acc:MGI:1278334]
ENSMUSG00000041688	0.0552	0.459	1.4	0.022	0.596	1.42	0.0149	0.0608	1.49	0.356	0.742	1.14	0.15	0.918	1.3	Amot	angiomotin [Source:MGI Symbol;Acc:MGI:108440]
ENSMUSG00000020212	0.0552	0.459	1.59	0.242	0.955	-1.29	0.382	0.557	1.21	0.371	0.755	1.21	0.98	0.999	1.01	Mdm1	transformed mouse 3T3 cell double minute 1 [Source:MGI Symbol;Acc:MGI:96951]
ENSMUSG00000031145	0.878	0.97	1.04	0.321	0.986	-1.22	0.00764	0.0382	-1.71	0.893	0.97	-1.02	0.079	0.917	-1.47	Prickle3	prickle homolog 3 (Drosophila) [Source:MGI Symbol;Acc:MGI:1859635]
ENSMUSG00000025277	0.971	0.996	1.01	0.254	0.963	-1.23	0.00779	0.0387	-1.71	0.548	0.849	1.12	0.797	0.984	-1.07	Abhd6	abhydrolase domain containing 6 [Source:MGI Symbol;Acc:MGI:1913332]
ENSMUSG00000031864	0.00472	0.238	-1.45	0.011	0.467	-1.34	1.76e-05	0.000639	-1.7	0.0749	0.407	-1.21	0.412	0.945	-1.12	Ints10	integrator complex subunit 10 [Source:MGI Symbol;Acc:MGI:1918135]
ENSMUSG00000044968	0.0554	0.46	-1.33	0.679	0.998	1.05	0.0288	0.0953	-1.34	0.772	0.933	-1.04	0.681	0.966	-1.07	Napepld	N-acyl phosphatidylethanolamine phospholipase D [Source:MGI Symbol;Acc:MGI:2140885]
ENSMUSG00000020744	0.0555	0.46	-1.58	0.875	0.998	-1.03	0.0173	0.0675	-1.67	0.787	0.939	1.05	0.291	0.929	1.31	Slc25a19	solute carrier family 25 (mitochondrial thiamine pyrophosphate carrier), member 19 [Source:MGI Symbol;Acc:MGI:1914533]
ENSMUSG00000033278	0.0555	0.46	-1.46	0.107	0.84	-1.33	0.0492	0.139	-1.43	0.0463	0.336	-1.41	0.305	0.934	-1.24	Ptprm	protein tyrosine phosphatase, receptor type, M [Source:MGI Symbol;Acc:MGI:102694]
ENSMUSG00000054733	0.00931	0.292	-1.51	0.911	0.998	1.01	0.000151	0.00271	-1.7	0.0609	0.376	-1.26	0.851	0.988	-1.03	Msra	methionine sulfoxide reductase A [Source:MGI Symbol;Acc:MGI:106916]
ENSMUSG00000021733	0.0555	0.46	1.49	0.263	0.964	1.23	0.0309	0.1	1.53	0.39	0.767	1.17	0.131	0.917	1.47	Slc4a7	solute carrier family 4, sodium bicarbonate cotransporter, member 7 [Source:MGI Symbol;Acc:MGI:2443878]
ENSMUSG00000073876	0.0555	0.46	2.24	0.823	0.998	-1.13	0.427	0.598	-1.29	0.858	0.96	1.1	0.232	0.918	-2.08	Gm13305	predicted gene 13305 [Source:MGI Symbol;Acc:MGI:3801997]
ENSMUSG00000081170	0.0556	0.46	-3.34	0.16	0.907	-2.34	0.369	0.545	1.7	0.583	0.867	1.38	0.568	0.955	1.56	Gm12922	predicted gene 12922 [Source:MGI Symbol;Acc:MGI:3651537]
ENSMUSG00000043733	0.0241	0.371	-1.29	0.0674	0.764	-1.2	3.79e-06	0.000205	-1.7	0.406	0.775	-1.08	0.0625	0.917	-1.24	Ptpn11	protein tyrosine phosphatase, non-receptor type 11 [Source:MGI Symbol;Acc:MGI:99511]
ENSMUSG00000024302	0.0435	0.429	-1.25	0.0128	0.495	-1.28	2.92e-06	0.000176	-1.7	0.222	0.629	1.12	0.32	0.936	1.12	Dtna	dystrobrevin alpha [Source:MGI Symbol;Acc:MGI:106039]
ENSMUSG00000031231	0.0557	0.46	-1.87	0.391	0.991	1.28	0.328	0.504	-1.34	0.535	0.844	-1.18	0.294	0.932	1.45	Cox7b	cytochrome c oxidase subunit VIIb [Source:MGI Symbol;Acc:MGI:1913392]
ENSMUSG00000021000	0.0557	0.46	-1.26	0.171	0.923	1.15	0.122	0.256	-1.19	0.326	0.716	-1.1	0.961	0.998	-1.01	Ctage5	CTAGE family, member 5 [Source:MGI Symbol;Acc:MGI:1346056]
ENSMUSG00000028634	0.0558	0.461	2.09	0.702	0.998	1.14	0.0877	0.205	1.66	0.0339	0.296	1.92	0.0801	0.917	2.27	Hivep3	human immunodeficiency virus type I enhancer binding protein 3 [Source:MGI Symbol;Acc:MGI:106589]
ENSMUSG00000100502	0.0558	0.461	3.4	0.0478	0.711	3.14	0.283	0.455	-1.85	0.115	0.485	2.33	0.396	0.944	1.78	Gm28286	predicted gene 28286 [Source:MGI Symbol;Acc:MGI:5578992]
ENSMUSG00000054256	0.0559	0.461	-2.59	0.679	0.998	-1.22	0.31	0.485	1.66	0.356	0.742	1.55	0.346	0.939	-1.65	Msi1	musashi RNA-binding protein 1 [Source:MGI Symbol;Acc:MGI:107376]
ENSMUSG00000022407	0.0475	0.445	-1.48	0.625	0.997	-1.09	0.00498	0.0282	-1.7	0.314	0.706	-1.18	0.633	0.959	1.1	Adsl	adenylosuccinate lyase [Source:MGI Symbol;Acc:MGI:103202]
ENSMUSG00000022210	0.056	0.461	-1.63	0.611	0.995	1.12	0.103	0.229	-1.45	0.503	0.83	-1.15	0.748	0.978	1.09	Dhrs4	dehydrogenase/reductase (SDR family) member 4 [Source:MGI Symbol;Acc:MGI:90169]
ENSMUSG00000049299	0.056	0.461	-1.47	0.663	0.998	1.08	0.407	0.58	-1.16	0.676	0.898	1.07	0.34	0.938	1.24	Trappc1	trafficking protein particle complex 1 [Source:MGI Symbol;Acc:MGI:1098727]
ENSMUSG00000020801	0.0561	0.462	-1.49	0.129	0.871	-1.39	0.0585	0.156	-1.42	0.164	0.561	1.3	0.00254	0.366	2.84	Med31	mediator complex subunit 31 [Source:MGI Symbol;Acc:MGI:1914529]
ENSMUSG00000063428	0.0783	0.499	-1.48	0.935	0.998	-1.02	0.00986	0.0456	-1.7	0.0436	0.327	-1.47	0.195	0.918	-1.36	Ddo	D-aspartate oxidase [Source:MGI Symbol;Acc:MGI:1925528]
ENSMUSG00000026170	0.00863	0.287	-1.73	0.0548	0.73	-1.41	2.97e-08	8.31e-06	-3.35	7.06e-05	0.0123	-2.09	0.00117	0.271	-2.06	Cyp27a1	cytochrome P450, family 27, subfamily a, polypeptide 1 [Source:MGI Symbol;Acc:MGI:88594]
ENSMUSG00000002820	0.0945	0.521	-1.34	0.599	0.995	1.08	0.00102	0.0099	-1.7	0.654	0.892	-1.07	0.409	0.945	1.17	Atg4d	autophagy related 4D, cysteine peptidase [Source:MGI Symbol;Acc:MGI:2444308]
ENSMUSG00000024829	0.0564	0.463	-1.94	0.673	0.998	1.15	0.0258	0.0888	-1.97	0.191	0.591	-1.44	0.334	0.938	1.5	Mrpl21	mitochondrial ribosomal protein L21 [Source:MGI Symbol;Acc:MGI:2660674]
ENSMUSG00000063787	0.0564	0.463	-1.74	0.546	0.994	1.17	0.0512	0.142	-1.66	0.328	0.717	-1.26	0.664	0.963	1.15	Chchd1	coiled-coil-helix-coiled-coil-helix domain containing 1 [Source:MGI Symbol;Acc:MGI:1913371]
ENSMUSG00000033128	0.0565	0.463	-1.34	0.542	0.994	-1.08	0.0236	0.0837	-1.37	0.998	1	-1	0.0967	0.917	-1.3	Gga1	golgi associated, gamma adaptin ear containing, ARF binding protein 1 [Source:MGI Symbol;Acc:MGI:2146207]
ENSMUSG00000032643	0.114	0.544	-1.39	0.201	0.936	-1.26	0.00796	0.0392	-1.7	0.9	0.973	-1.02	0.772	0.98	1.07	Fhl3	four and a half LIM domains 3 [Source:MGI Symbol;Acc:MGI:1341092]
ENSMUSG00000024360	0.119	0.547	-1.32	0.152	0.9	-1.25	0.00208	0.0155	-1.7	0.485	0.821	-1.11	0.769	0.98	-1.06	Etf1	eukaryotic translation termination factor 1 [Source:MGI Symbol;Acc:MGI:2385071]
ENSMUSG00000098192	0.0566	0.463	-2.42	0.959	0.998	-1.02	0.178	0.333	-1.8	0.859	0.96	1.07	0.773	0.98	1.18	Gm3534	predicted pseudogene 3534 [Source:MGI Symbol;Acc:MGI:3781711]
ENSMUSG00000039384	0.0566	0.463	-1.93	0.604	0.995	-1.17	0.0336	0.106	-1.98	0.845	0.957	1.06	0.195	0.918	1.69	Dusp10	dual specificity phosphatase 10 [Source:MGI Symbol;Acc:MGI:1927070]
ENSMUSG00000038967	0.135	0.568	-1.29	0.722	0.998	-1.05	0.00148	0.0126	-1.7	0.0327	0.291	-1.37	0.115	0.917	-1.33	Pdk2	pyruvate dehydrogenase kinase, isoenzyme 2 [Source:MGI Symbol;Acc:MGI:1343087]
ENSMUSG00000023074	0.2	0.635	-1.24	0.842	0.998	1.03	0.00101	0.00984	-1.7	0.0034	0.104	-1.54	0.0169	0.728	-1.54	Mospd1	motile sperm domain containing 1 [Source:MGI Symbol;Acc:MGI:1917630]
ENSMUSG00000072915	0.0566	0.463	1.92	0.0346	0.655	2.04	0.0305	0.0993	1.96	0.441	0.797	1.26	0.541	0.955	-1.26	Gm12258	predicted gene 12258 [Source:MGI Symbol;Acc:MGI:3651534]
ENSMUSG00000057286	0.0567	0.463	1.58	0.286	0.974	-1.27	0.15	0.295	1.31	0.315	0.707	-1.24	0.123	0.917	-1.46	St6galnac2	ST6 (alpha-N-acetyl-neuraminyl-2,3-beta-galactosyl-1,3)-N-acetylgalactosaminide alpha-2,6-sialyltransferase 2 [Source:MGI Symbol;Acc:MGI:107553]
ENSMUSG00000036450	0.271	0.694	-1.18	0.0349	0.658	-1.33	0.000438	0.00559	-1.7	0.00167	0.0736	-1.53	0.00133	0.281	-1.71	Hif1an	hypoxia-inducible factor 1, alpha subunit inhibitor [Source:MGI Symbol;Acc:MGI:2442345]
ENSMUSG00000034748	0.0568	0.463	1.58	0.33	0.987	1.24	0.174	0.329	1.32	0.313	0.705	1.22	0.618	0.957	1.14	Sirt6	sirtuin 6 [Source:MGI Symbol;Acc:MGI:1354161]
ENSMUSG00000034620	0.33	0.73	-1.17	0.946	0.998	1.01	0.00059	0.00686	-1.7	0.0878	0.436	-1.26	0.371	0.94	-1.17	Tmem5	transmembrane protein 5 [Source:MGI Symbol;Acc:MGI:2384919]
ENSMUSG00000046070	0.0569	0.463	-1.67	0.531	0.994	1.17	0.601	0.744	-1.14	0.102	0.464	-1.54	0.0133	0.677	-2.35	Igfals	insulin-like growth factor binding protein, acid labile subunit [Source:MGI Symbol;Acc:MGI:107973]
ENSMUSG00000035498	0.0569	0.463	3.05	0.281	0.974	1.81	0.0661	0.17	2.92	0.577	0.863	1.34	0.225	0.918	2.28	Cdcp1	CUB domain containing protein 1 [Source:MGI Symbol;Acc:MGI:2442010]
ENSMUSG00000021408	0.057	0.464	1.68	0.209	0.941	-1.35	0.0276	0.0928	1.66	0.518	0.837	1.16	0.665	0.963	1.14	Ripk1	receptor (TNFRSF)-interacting serine-threonine kinase 1 [Source:MGI Symbol;Acc:MGI:108212]
ENSMUSG00000035735	0.46	0.806	-1.15	0.124	0.865	-1.28	0.00144	0.0123	-1.7	0.966	0.991	1.01	0.935	0.995	-1.02	Dagla	diacylglycerol lipase, alpha [Source:MGI Symbol;Acc:MGI:2677061]
ENSMUSG00000078619	0.0571	0.464	1.35	0.0242	0.607	-1.38	0.0517	0.143	1.32	0.0426	0.324	1.32	0.545	0.955	1.11	Smarcd2	SWI/SNF related, matrix associated, actin dependent regulator of chromatin, subfamily d, member 2 [Source:MGI Symbol;Acc:MGI:1933621]
ENSMUSG00000020919	0.697	0.907	-1.06	0.701	0.998	1.06	0.000735	0.00788	-1.7	0.00113	0.0605	-1.59	0.125	0.917	-1.3	Stat5b	signal transducer and activator of transcription 5B [Source:MGI Symbol;Acc:MGI:103035]
ENSMUSG00000028795	0.0223	0.362	-1.54	0.435	0.992	-1.13	0.0017	0.0137	-1.69	0.319	0.71	-1.16	0.864	0.99	-1.03	Ccdc28b	coiled coil domain containing 28B [Source:MGI Symbol;Acc:MGI:1913514]
ENSMUSG00000022383	0.0573	0.465	-1.59	0.747	0.998	-1.07	0.0664	0.17	-1.49	0.00464	0.12	-1.84	0.112	0.917	-1.49	Ppara	peroxisome proliferator activated receptor alpha [Source:MGI Symbol;Acc:MGI:104740]
ENSMUSG00000015289	0.0573	0.465	-1.56	0.283	0.974	1.28	0.0341	0.107	-1.53	0.162	0.558	-1.29	0.435	0.946	1.24	Lage3	L antigen family, member 3 [Source:MGI Symbol;Acc:MGI:1913442]
ENSMUSG00000027716	0.0574	0.465	-1.53	0.433	0.992	1.2	0.419	0.591	-1.18	0.93	0.982	-1.02	0.919	0.995	-1.03	Trpc3	transient receptor potential cation channel, subfamily C, member 3 [Source:MGI Symbol;Acc:MGI:109526]
ENSMUSG00000053768	0.0242	0.371	-1.47	0.294	0.979	-1.17	0.00144	0.0123	-1.69	0.533	0.843	-1.09	0.758	0.979	1.06	Chchd3	coiled-coil-helix-coiled-coil-helix domain containing 3 [Source:MGI Symbol;Acc:MGI:1913325]
ENSMUSG00000036646	0.0574	0.465	1.26	0.483	0.993	1.08	0.23	0.395	1.14	0.446	0.8	1.08	0.262	0.924	1.16	Man1b1	mannosidase, alpha, class 1B, member 1 [Source:MGI Symbol;Acc:MGI:2684954]
ENSMUSG00000069135	0.0377	0.415	-1.35	0.355	0.991	-1.12	0.000114	0.00221	-1.69	0.0863	0.433	-1.23	0.709	0.971	-1.06	Fgfr1op	Fgfr1 oncogene partner [Source:MGI Symbol;Acc:MGI:1922546]
ENSMUSG00000058979	0.0426	0.428	-1.36	0.839	0.998	1.03	0.000257	0.00387	-1.69	0.687	0.903	-1.06	0.515	0.952	1.12	Cecr5	cat eye syndrome chromosome region, candidate 5 [Source:MGI Symbol;Acc:MGI:2136976]
ENSMUSG00000078786	0.0576	0.465	1.29	0.41	0.992	1.11	0.227	0.392	-1.15	0.646	0.89	1.05	0.551	0.955	-1.09	BC024978	cDNA sequence BC024978 [Source:MGI Symbol;Acc:MGI:3041247]
ENSMUSG00000042699	0.0576	0.465	1.32	0.163	0.909	1.19	0.0177	0.0684	1.38	0.794	0.942	-1.03	0.615	0.957	1.08	Dhx9	DEAH (Asp-Glu-Ala-His) box polypeptide 9 [Source:MGI Symbol;Acc:MGI:108177]
ENSMUSG00000085939	0.0576	0.465	2.32	0.236	0.953	1.77	0.0418	0.124	2.33	0.57	0.86	1.24	0.456	0.948	1.47	Cd63-ps	CD63 antigen, pseudogene [Source:MGI Symbol;Acc:MGI:105972]
ENSMUSG00000024228	0.0577	0.466	-1.39	0.556	0.994	1.1	0.0375	0.114	-1.37	0.355	0.742	-1.15	0.456	0.948	-1.16	Nudt12	nudix (nucleoside diphosphate linked moiety X)-type motif 12 [Source:MGI Symbol;Acc:MGI:1915243]
ENSMUSG00000021496	0.0578	0.466	-3.02	0.435	0.992	1.53	0.778	0.871	-1.14	0.301	0.697	-1.57	0.507	0.952	1.58	Pcbd2	pterin 4 alpha carbinolamine dehydratase/dimerization cofactor of hepatocyte nuclear factor 1 alpha (TCF1) 2 [Source:MGI Symbol;Acc:MGI:1919812]
ENSMUSG00000028811	0.0546	0.457	-1.3	0.0415	0.689	-1.28	9.99e-05	0.00199	-1.69	0.117	0.488	-1.2	0.181	0.918	-1.21	Yars	tyrosyl-tRNA synthetase [Source:MGI Symbol;Acc:MGI:2147627]
ENSMUSG00000030556	0.08	0.501	-1.3	0.165	0.913	-1.2	0.000221	0.00354	-1.69	0.0776	0.415	-1.24	0.52	0.952	-1.11	Lrrc28	leucine rich repeat containing 28 [Source:MGI Symbol;Acc:MGI:1915689]
ENSMUSG00000029613	0.0579	0.466	-1.23	0.145	0.891	1.15	0.472	0.638	-1.07	0.495	0.827	-1.06	0.107	0.917	-1.21	Eif2ak1	eukaryotic translation initiation factor 2 alpha kinase 1 [Source:MGI Symbol;Acc:MGI:1353448]
ENSMUSG00000022091	0.952	0.991	-1.01	0.284	0.974	-1.21	0.367	0.542	-1.18	6.48e-05	0.0115	-2.07	0.000743	0.202	-2.1	Sorbs3	sorbin and SH3 domain containing 3 [Source:MGI Symbol;Acc:MGI:700013]
ENSMUSG00000019986	0.0579	0.466	1.71	0.477	0.992	1.23	0.0208	0.0767	1.85	0.336	0.725	1.27	0.178	0.918	1.6	Ahi1	Abelson helper integration site 1 [Source:MGI Symbol;Acc:MGI:87971]
ENSMUSG00000028159	0.058	0.467	-1.5	0.00932	0.451	-1.77	0.141	0.283	-1.34	0.853	0.959	1.03	0.595	0.955	-1.14	Dapp1	dual adaptor for phosphotyrosine and 3-phosphoinositides 1 [Source:MGI Symbol;Acc:MGI:1347063]
ENSMUSG00000028224	0.058	0.467	-1.46	0.542	0.994	1.11	0.191	0.349	-1.27	0.19	0.59	-1.25	0.442	0.948	1.19	Nbn	nibrin [Source:MGI Symbol;Acc:MGI:1351625]
ENSMUSG00000007659	0.0581	0.467	1.58	0.014	0.51	-1.69	0.858	0.92	1.04	0.155	0.548	-1.31	0.0628	0.917	-1.56	Bcl2l1	BCL2-like 1 [Source:MGI Symbol;Acc:MGI:88139]
ENSMUSG00000072980	0.0581	0.467	2.36	0.23	0.951	1.67	0.316	0.491	1.47	0.272	0.672	1.57	0.608	0.956	-1.26	Oip5	Opa interacting protein 5 [Source:MGI Symbol;Acc:MGI:1917895]
ENSMUSG00000048495	0.0582	0.467	1.62	0.901	0.998	1.03	0.124	0.259	1.41	0.241	0.648	1.28	0.229	0.918	1.45	Tyw5	tRNA-yW synthesizing protein 5 [Source:MGI Symbol;Acc:MGI:1915986]
ENSMUSG00000049532	0.0582	0.467	1.75	0.104	0.83	1.62	0.0142	0.0589	2.03	0.694	0.905	1.11	0.983	0.999	-1.01	Sall2	sal-like 2 (Drosophila) [Source:MGI Symbol;Acc:MGI:1354373]
ENSMUSG00000038552	0.0582	0.467	1.89	0.495	0.993	-1.23	0.0127	0.0544	2.2	0.134	0.518	1.57	0.308	0.934	-1.47	Fndc4	fibronectin type III domain containing 4 [Source:MGI Symbol;Acc:MGI:1917195]
ENSMUSG00000022742	0.319	0.724	-1.15	0.504	0.994	-1.08	9.14e-05	0.00187	-1.69	0.0341	0.296	-1.28	0.977	0.999	-1	Cpox	coproporphyrinogen oxidase [Source:MGI Symbol;Acc:MGI:104841]
ENSMUSG00000038250	0.383	0.761	-1.16	0.206	0.938	-1.21	0.00164	0.0134	-1.69	0.0948	0.451	-1.28	0.44	0.946	-1.15	Usp38	ubiquitin specific peptidase 38 [Source:MGI Symbol;Acc:MGI:1922091]
ENSMUSG00000040423	0.85	0.961	-1.03	0.374	0.991	-1.14	0.00186	0.0146	-1.69	0.184	0.584	-1.22	0.727	0.974	1.07	Rc3h1	RING CCCH (C3H) domains 1 [Source:MGI Symbol;Acc:MGI:2685397]
ENSMUSG00000002948	0.862	0.965	-1.03	0.0316	0.64	-1.33	0.000348	0.0048	-1.69	0.113	0.481	-1.22	0.00117	0.271	-1.71	Map2k7	mitogen-activated protein kinase kinase 7 [Source:MGI Symbol;Acc:MGI:1346871]
ENSMUSG00000041360	0.0584	0.467	1.34	0.89	0.998	1.02	0.0205	0.0759	1.37	0.136	0.521	1.21	0.259	0.924	1.21	Pum3	pumilio RNA-binding family member 3 [Source:MGI Symbol;Acc:MGI:106253]
ENSMUSG00000025266	0.0584	0.467	1.36	0.173	0.923	1.21	0.804	0.886	1.04	0.334	0.723	-1.14	0.509	0.952	-1.12	Gnl3l	guanine nucleotide binding protein-like 3 (nucleolar)-like [Source:MGI Symbol;Acc:MGI:2448557]
ENSMUSG00000001424	0.0585	0.467	1.26	0.904	0.998	1.01	0.23	0.396	1.14	0.00325	0.102	1.36	0.0673	0.917	1.27	Snd1	staphylococcal nuclease and tudor domain containing 1 [Source:MGI Symbol;Acc:MGI:1929266]
ENSMUSG00000001656	0.96	0.993	1.01	0.994	1	1	0.000405	0.0053	-1.69	0.67	0.897	-1.06	0.122	0.917	-1.33	Hoxc11	homeobox C11 [Source:MGI Symbol;Acc:MGI:96193]
ENSMUSG00000014313	0.0586	0.467	-1.59	0.682	0.998	1.09	0.0564	0.152	-1.55	0.331	0.72	-1.22	0.309	0.934	1.3	Cox6c	cytochrome c oxidase subunit VIc [Source:MGI Symbol;Acc:MGI:104614]
ENSMUSG00000025173	0.0586	0.467	-1.25	0.849	0.998	-1.02	0.112	0.243	-1.18	0.317	0.708	-1.1	0.377	0.941	-1.12	Wdr45b	WD repeat domain 45B [Source:MGI Symbol;Acc:MGI:1914090]
ENSMUSG00000027774	0.000339	0.108	-1.53	0.902	0.998	1.01	5.19e-06	0.00026	-1.68	0.0427	0.324	-1.21	0.198	0.918	-1.16	Gfm1	G elongation factor, mitochondrial 1 [Source:MGI Symbol;Acc:MGI:107339]
ENSMUSG00000063179	0.0054	0.247	-1.8	0.412	0.992	1.16	0.00471	0.0271	-1.68	0.0465	0.336	-1.41	0.785	0.982	1.06	Pstk	phosphoseryl-tRNA kinase [Source:MGI Symbol;Acc:MGI:2685945]
ENSMUSG00000078867	0.0587	0.468	-2.77	0.812	0.998	-1.11	0.15	0.295	-1.95	0.759	0.929	1.16	0.943	0.996	1.05	Gm14418	predicted gene 14418 [Source:MGI Symbol;Acc:MGI:3702408]
ENSMUSG00000040850	0.00698	0.268	-1.78	0.124	0.865	-1.33	2.2e-06	0.000148	-2.77	0.000123	0.0173	-2.06	0.0497	0.917	-1.54	Psme4	proteasome (prosome, macropain) activator subunit 4 [Source:MGI Symbol;Acc:MGI:2143994]
ENSMUSG00000028273	0.0587	0.468	-1.4	0.222	0.948	-1.21	0.0596	0.158	-1.36	0.655	0.892	-1.07	0.907	0.994	1.02	Pdlim5	PDZ and LIM domain 5 [Source:MGI Symbol;Acc:MGI:1927489]
ENSMUSG00000029780	0.0434	0.429	-1.47	0.979	0.999	-1	0.00371	0.0229	-1.68	0.789	0.939	1.04	0.124	0.917	1.36	Nt5c3	5'-nucleotidase, cytosolic III [Source:MGI Symbol;Acc:MGI:1927186]
ENSMUSG00000063235	0.0589	0.468	-1.61	0.578	0.994	-1.13	0.0944	0.215	-1.46	0.346	0.734	-1.22	0.341	0.938	1.3	Ptpmt1	protein tyrosine phosphatase, mitochondrial 1 [Source:MGI Symbol;Acc:MGI:1913711]
ENSMUSG00000024594	0.0589	0.468	-1.26	0.844	0.998	-1.02	0.227	0.392	-1.15	0.012	0.189	-1.31	0.516	0.952	1.09	Prrc1	proline-rich coiled-coil 1 [Source:MGI Symbol;Acc:MGI:1916106]
ENSMUSG00000060716	0.0589	0.468	4.63	0.736	0.998	1.24	0.125	0.261	2.87	0.0122	0.191	4.73	0.225	0.918	2.78	Plekhh1	pleckstrin homology domain containing, family H (with MyTH4 domain) member 1 [Source:MGI Symbol;Acc:MGI:2144989]
ENSMUSG00000000339	0.059	0.468	-1.48	0.691	0.998	-1.07	0.016	0.064	-1.55	0.243	0.65	-1.21	0.635	0.96	1.11	Rtca	RNA 3'-terminal phosphate cyclase [Source:MGI Symbol;Acc:MGI:1913618]
ENSMUSG00000028863	0.059	0.468	1.3	0.979	0.999	-1	0.0237	0.0839	1.32	0.251	0.657	1.14	0.792	0.983	-1.04	Meaf6	MYST/Esa1-associated factor 6 [Source:MGI Symbol;Acc:MGI:1917338]
ENSMUSG00000091831	0.059	0.468	3.01	0.0652	0.755	-2.75	0.264	0.435	-1.68	0.118	0.491	2.22	0.952	0.997	-1.04	Gm4707	predicted gene 4707 [Source:MGI Symbol;Acc:MGI:3782887]
ENSMUSG00000050493	0.0591	0.468	-2.62	0.356	0.991	1.64	0.0146	0.0601	4.16	0.103	0.464	2.28	0.637	0.96	1.35	Fam167b	family with sequence similarity 167, member B [Source:MGI Symbol;Acc:MGI:2668032]
ENSMUSG00000020929	0.0591	0.468	1.27	0.493	0.993	-1.08	0.817	0.895	1.03	0.234	0.64	1.13	0.664	0.963	-1.06	Eftud2	elongation factor Tu GTP binding domain containing 2 [Source:MGI Symbol;Acc:MGI:1336880]
ENSMUSG00000027822	0.0591	0.468	1.47	0.0696	0.767	1.39	0.0229	0.0821	1.49	0.394	0.77	1.16	0.369	0.94	1.23	Slc33a1	solute carrier family 33 (acetyl-CoA transporter), member 1 [Source:MGI Symbol;Acc:MGI:1332247]
ENSMUSG00000041471	0.0512	0.453	-1.41	0.496	0.993	-1.11	0.00123	0.011	-1.68	0.00208	0.0839	-1.61	0.438	0.946	-1.17	Fam35a	family with sequence similarity 35, member A [Source:MGI Symbol;Acc:MGI:1922948]
ENSMUSG00000054452	0.0583	0.467	-1.4	0.0449	0.704	-1.37	0.00248	0.0174	-1.68	0.671	0.897	-1.07	0.542	0.955	-1.12	Aes	amino-terminal enhancer of split [Source:MGI Symbol;Acc:MGI:95806]
ENSMUSG00000068663	0.0723	0.494	-1.24	0.3	0.984	-1.11	1.17e-05	0.000479	-1.68	0.0156	0.216	-1.28	0.0132	0.674	-1.37	Clec16a	C-type lectin domain family 16, member A [Source:MGI Symbol;Acc:MGI:1921624]
ENSMUSG00000068917	0.0593	0.468	1.3	0.801	0.998	1.03	0.0654	0.168	1.25	0.0549	0.357	1.25	0.163	0.918	1.24	Clk2	CDC-like kinase 2 [Source:MGI Symbol;Acc:MGI:1098669]
ENSMUSG00000008450	0.1	0.526	-1.33	0.862	0.998	1.03	0.00136	0.0119	-1.68	0.13	0.51	-1.25	0.521	0.952	-1.13	Nutf2	nuclear transport factor 2 [Source:MGI Symbol;Acc:MGI:1915301]
ENSMUSG00000091534	0.0593	0.468	2.78	0.11	0.845	2.21	0.642	0.775	-1.22	0.0629	0.38	2.55	0.433	0.946	1.6	Gm17195	predicted gene 17195 [Source:MGI Symbol;Acc:MGI:4938022]
ENSMUSG00000021606	0.0594	0.468	-2.64	0.859	0.998	-1.08	0.0711	0.178	-2.29	0.242	0.649	-1.63	0.258	0.924	1.95	Ndufs6	NADH dehydrogenase (ubiquinone) Fe-S protein 6 [Source:MGI Symbol;Acc:MGI:107932]
ENSMUSG00000038296	0.0594	0.468	-1.58	0.86	0.998	1.04	0.743	0.846	-1.07	0.0601	0.373	-1.5	0.978	0.999	-1.01	Galnt18	UDP-N-acetyl-alpha-D-galactosamine:polypeptide N-acetylgalactosaminyltransferase 18 [Source:MGI Symbol;Acc:MGI:2446239]
ENSMUSG00000033216	0.0594	0.468	-1.56	0.966	0.999	-1.01	0.151	0.297	-1.31	0.731	0.918	-1.06	0.25	0.923	-1.31	Eefsec	eukaryotic elongation factor, selenocysteine-tRNA-specific [Source:MGI Symbol;Acc:MGI:2137092]
ENSMUSG00000039891	0.124	0.555	-1.28	0.742	0.998	-1.05	0.001	0.00974	-1.68	0.0199	0.24	-1.38	0.344	0.939	-1.17	Txlnb	taxilin beta [Source:MGI Symbol;Acc:MGI:2671945]
ENSMUSG00000037275	0.0594	0.468	1.32	0.503	0.994	-1.09	0.512	0.672	1.09	0.54	0.845	1.08	0.675	0.965	-1.07	Gemin5	gem (nuclear organelle) associated protein 5 [Source:MGI Symbol;Acc:MGI:2449311]
ENSMUSG00000059895	0.8	0.945	-1.05	0.0478	0.711	-1.44	0.0983	0.222	-1.39	0.000129	0.0173	-2.06	0.0568	0.917	-1.52	Ptp4a3	protein tyrosine phosphatase 4a3 [Source:MGI Symbol;Acc:MGI:1277098]
ENSMUSG00000024132	0.0596	0.468	-1.57	0.672	0.998	1.09	0.184	0.34	-1.34	0.0731	0.403	-1.44	0.567	0.955	-1.16	Eci1	enoyl-Coenzyme A delta isomerase 1 [Source:MGI Symbol;Acc:MGI:94871]
ENSMUSG00000024218	0.0596	0.468	-1.49	0.215	0.942	1.28	0.427	0.599	-1.15	0.854	0.959	-1.03	0.943	0.996	-1.02	Taf11	TAF11 RNA polymerase II, TATA box binding protein (TBP)-associated factor [Source:MGI Symbol;Acc:MGI:1916026]
ENSMUSG00000024513	0.0596	0.468	-1.28	0.453	0.992	-1.09	0.0235	0.0834	-1.31	0.778	0.935	-1.03	0.603	0.956	-1.07	Mbd2	methyl-CpG binding domain protein 2 [Source:MGI Symbol;Acc:MGI:1333813]
ENSMUSG00000015087	0.174	0.611	-1.17	0.246	0.959	-1.13	1.23e-05	0.000497	-1.68	0.844	0.957	-1.02	0.393	0.944	-1.11	Rabl6	RAB, member RAS oncogene family-like 6 [Source:MGI Symbol;Acc:MGI:2442633]
ENSMUSG00000028138	0.0596	0.468	-1.26	0.331	0.987	-1.11	0.0114	0.0505	-1.33	0.124	0.5	-1.17	0.889	0.992	1.02	Adh5	alcohol dehydrogenase 5 (class III), chi polypeptide [Source:MGI Symbol;Acc:MGI:87929]
ENSMUSG00000001123	0.0596	0.468	1.69	0.517	0.994	-1.18	0.0216	0.0788	1.8	0.369	0.753	1.25	0.707	0.971	1.13	Lgals9	lectin, galactose binding, soluble 9 [Source:MGI Symbol;Acc:MGI:109496]
ENSMUSG00000042462	0.0597	0.468	-1.91	0.928	0.998	1.03	0.334	0.51	-1.31	0.806	0.948	-1.07	0.507	0.952	1.33	Dctpp1	dCTP pyrophosphatase 1 [Source:MGI Symbol;Acc:MGI:1913672]
ENSMUSG00000021102	0.0597	0.468	-1.88	0.806	0.998	1.08	0.0488	0.138	-1.8	0.652	0.892	-1.13	0.2	0.918	1.63	Glrx5	glutaredoxin 5 homolog (S. cerevisiae) [Source:MGI Symbol;Acc:MGI:1920296]
ENSMUSG00000004610	0.0597	0.468	-1.64	0.365	0.991	-1.23	0.0356	0.11	-1.66	0.17	0.565	-1.35	0.465	0.948	1.22	Etfb	electron transferring flavoprotein, beta polypeptide [Source:MGI Symbol;Acc:MGI:106098]
ENSMUSG00000020948	0.0597	0.468	-1.63	0.942	0.998	1.02	0.511	0.671	-1.2	0.693	0.905	-1.11	0.0501	0.917	2.18	Klhl28	kelch-like 28 [Source:MGI Symbol;Acc:MGI:1913939]
ENSMUSG00000028042	0.318	0.723	-1.19	0.117	0.859	-1.29	0.0019	0.0148	-1.68	0.564	0.858	1.09	0.771	0.98	-1.06	Zbtb7b	zinc finger and BTB domain containing 7B [Source:MGI Symbol;Acc:MGI:102755]
ENSMUSG00000028847	0.0597	0.468	-1.29	0.464	0.992	-1.09	0.96	0.978	-1.01	0.094	0.449	1.21	0.0938	0.917	1.29	Trappc3	trafficking protein particle complex 3 [Source:MGI Symbol;Acc:MGI:1351486]
ENSMUSG00000022484	0.0598	0.468	-1.33	0.163	0.911	1.2	0.0124	0.0534	-1.42	0.186	0.587	-1.18	0.745	0.977	-1.05	Hoxc10	homeobox C10 [Source:MGI Symbol;Acc:MGI:96192]
ENSMUSG00000023020	0.0599	0.468	-1.74	0.817	0.998	1.06	0.0326	0.104	-1.78	0.833	0.954	-1.05	0.431	0.946	1.28	Cox14	cytochrome c oxidase assembly protein 14 [Source:MGI Symbol;Acc:MGI:1913629]
ENSMUSG00000024269	0.412	0.779	-1.16	0.671	0.998	1.08	0.00229	0.0165	-1.68	0.0159	0.217	-1.5	0.884	0.992	1.03	Tpgs2	tubulin polyglutamylase complex subunit 2 [Source:MGI Symbol;Acc:MGI:1913898]
ENSMUSG00000038412	0.423	0.786	-1.15	0.697	0.998	1.06	0.00177	0.0141	-1.68	0.484	0.82	-1.11	0.694	0.968	1.08	Higd1a	HIG1 domain family, member 1A [Source:MGI Symbol;Acc:MGI:1930666]
ENSMUSG00000041143	2.98e-05	0.0265	2.61	0.749	0.998	1.05	0.0633	0.165	1.33	4.36e-05	0.00858	-2.05	0.00776	0.558	-1.78	Tmco4	transmembrane and coiled-coil domains 4 [Source:MGI Symbol;Acc:MGI:1924306]
ENSMUSG00000054074	0.0601	0.469	-2.24	0.662	0.998	-1.18	0.222	0.386	-1.59	0.181	0.58	-1.68	0.0758	0.917	-2.13	Skida1	SKI/DACH domain containing 1 [Source:MGI Symbol;Acc:MGI:1919918]
ENSMUSG00000066677	0.0603	0.47	-2.7	0.816	0.998	1.15	0.0631	0.165	3.02	0.915	0.976	-1.06	0.642	0.96	1.36	Pydc3	pyrin domain containing 3 [Source:MGI Symbol;Acc:MGI:2442822]
ENSMUSG00000040280	0.0603	0.47	-1.79	0.884	0.998	-1.05	0.379	0.554	-1.28	0.136	0.521	-1.5	0.545	0.955	1.29	Ndufa4l2	NADH dehydrogenase (ubiquinone) 1 alpha subcomplex, 4-like 2 [Source:MGI Symbol;Acc:MGI:3039567]
ENSMUSG00000030905	0.0603	0.47	-1.75	0.635	0.997	-1.14	0.0402	0.12	-1.64	0.475	0.814	-1.18	0.631	0.959	-1.17	Crym	crystallin, mu [Source:MGI Symbol;Acc:MGI:102675]
ENSMUSG00000050211	0.577	0.861	-1.1	0.446	0.992	-1.12	0.00144	0.0123	-1.68	0.0344	0.297	1.36	0.327	0.938	-1.19	Pla2g4e	phospholipase A2, group IVE [Source:MGI Symbol;Acc:MGI:1919144]
ENSMUSG00000027305	0.0604	0.47	-1.33	0.133	0.875	1.22	0.0282	0.0941	-1.36	0.617	0.879	1.07	0.904	0.994	-1.02	Ndufaf1	NADH dehydrogenase (ubiquinone) 1 alpha subcomplex, assembly factor 1 [Source:MGI Symbol;Acc:MGI:1916952]
ENSMUSG00000037486	0.62	0.878	-1.08	0.345	0.99	-1.14	0.000858	0.00877	-1.68	0.832	0.954	-1.03	0.387	0.942	1.17	Asxl2	additional sex combs like 2 (Drosophila) [Source:MGI Symbol;Acc:MGI:1922552]
ENSMUSG00000032602	0.00387	0.223	-1.57	0.533	0.994	1.09	0.000475	0.00589	-1.67	0.297	0.695	-1.14	0.744	0.977	1.05	Slc25a20	solute carrier family 25 (mitochondrial carnitine/acylcarnitine translocase), member 20 [Source:MGI Symbol;Acc:MGI:1928738]
ENSMUSG00000026857	0.0138	0.329	-1.54	0.0152	0.523	-1.51	0.000854	0.00876	-1.67	0.664	0.895	1.06	0.744	0.977	1.07	Ntmt1	N-terminal Xaa-Pro-Lys N-methyltransferase 1 [Source:MGI Symbol;Acc:MGI:1913867]
ENSMUSG00000023938	0.0146	0.331	-1.53	0.141	0.886	-1.25	0.00128	0.0114	-1.67	0.235	0.641	-1.19	0.59	0.955	-1.1	Aars2	alanyl-tRNA synthetase 2, mitochondrial (putative) [Source:MGI Symbol;Acc:MGI:2681839]
ENSMUSG00000001768	0.0605	0.47	1.51	0.73	0.998	-1.07	0.0272	0.0918	1.57	0.896	0.972	-1.02	0.556	0.955	-1.15	Rin2	Ras and Rab interactor 2 [Source:MGI Symbol;Acc:MGI:1921280]
ENSMUSG00000030045	0.0247	0.374	-1.37	0.0921	0.813	-1.22	9.38e-05	0.0019	-1.67	0.486	0.821	-1.08	0.643	0.96	-1.07	Mrpl19	mitochondrial ribosomal protein L19 [Source:MGI Symbol;Acc:MGI:1926274]
ENSMUSG00000022360	0.0605	0.47	1.97	0.373	0.991	1.36	0.0176	0.0681	2.33	0.157	0.551	1.62	0.168	0.918	1.87	Atad2	ATPase family, AAA domain containing 2 [Source:MGI Symbol;Acc:MGI:1917722]
ENSMUSG00000061650	0.0394	0.419	-1.43	0.344	0.99	-1.15	0.00116	0.0107	-1.67	0.897	0.972	1.02	0.703	0.97	-1.07	Med9	mediator complex subunit 9 [Source:MGI Symbol;Acc:MGI:2183151]
ENSMUSG00000068686	0.0607	0.47	-2.1	0.495	0.993	1.22	0.11	0.239	-1.63	0.297	0.695	-1.37	0.485	0.95	-1.32	Cd59b	CD59b antigen [Source:MGI Symbol;Acc:MGI:1888996]
ENSMUSG00000011257	0.0396	0.419	-1.37	0.308	0.984	-1.14	0.000479	0.00591	-1.67	0.608	0.877	1.07	0.574	0.955	1.09	Pabpc4	poly(A) binding protein, cytoplasmic 4 [Source:MGI Symbol;Acc:MGI:2385206]
ENSMUSG00000052812	0.0607	0.47	-1.62	0.658	0.998	-1.1	0.0114	0.0505	-1.96	0.139	0.525	-1.44	0.106	0.917	1.73	Atad2b	ATPase family, AAA domain containing 2B [Source:MGI Symbol;Acc:MGI:2444798]
ENSMUSG00000069682	0.0607	0.47	2.46	0.474	0.992	1.31	0.121	0.255	1.82	0.269	0.67	1.49	0.865	0.99	1.09	Gm10275	predicted pseudogene 10275 [Source:MGI Symbol;Acc:MGI:3704354]
ENSMUSG00000039347	0.0454	0.438	-1.47	0.392	0.991	-1.16	0.00371	0.0229	-1.67	0.054	0.355	-1.37	0.602	0.956	-1.11	Atp6v0e2	ATPase, H+ transporting, lysosomal V0 subunit E2 [Source:MGI Symbol;Acc:MGI:1923502]
ENSMUSG00000058886	0.0609	0.471	-1.33	0.518	0.994	-1.1	0.0652	0.168	-1.28	0.558	0.855	-1.08	0.612	0.956	-1.09	Deaf1	deformed epidermal autoregulatory factor 1 (Drosophila) [Source:MGI Symbol;Acc:MGI:1858496]
ENSMUSG00000021577	0.0479	0.445	-1.27	0.271	0.968	-1.12	2.55e-05	0.000827	-1.67	0.303	0.699	-1.11	0.0916	0.917	-1.24	Sdha	succinate dehydrogenase complex, subunit A, flavoprotein (Fp) [Source:MGI Symbol;Acc:MGI:1914195]
ENSMUSG00000054150	0.0611	0.472	1.73	0.35	0.99	1.3	0.219	0.383	1.36	0.55	0.851	1.18	0.422	0.946	-1.3	Syne3	spectrin repeat containing, nuclear envelope family member 3 [Source:MGI Symbol;Acc:MGI:2442408]
ENSMUSG00000021024	0.0612	0.472	-1.75	0.962	0.998	1.01	0.187	0.344	-1.44	0.451	0.802	-1.21	0.245	0.923	1.45	Psma6	proteasome (prosome, macropain) subunit, alpha type 6 [Source:MGI Symbol;Acc:MGI:1347006]
ENSMUSG00000024826	0.0612	0.472	-1.3	0.446	0.992	-1.1	0.0309	0.1	-1.31	0.406	0.775	-1.1	0.815	0.987	1.03	Dpf2	D4, zinc and double PHD fingers family 2 [Source:MGI Symbol;Acc:MGI:109529]
ENSMUSG00000020844	0.0753	0.497	-1.35	0.0285	0.626	-1.38	0.0011	0.0103	-1.67	0.0457	0.333	1.32	0.454	0.948	1.14	Nxn	nucleoredoxin [Source:MGI Symbol;Acc:MGI:109331]
ENSMUSG00000035671	0.0613	0.472	1.4	0.901	0.998	1.02	0.549	0.701	1.09	0.196	0.598	-1.22	0.342	0.938	-1.2	Zswim4	zinc finger SWIM-type containing 4 [Source:MGI Symbol;Acc:MGI:2443726]
ENSMUSG00000031347	0.0776	0.498	-1.39	0.921	0.998	-1.02	0.00256	0.0178	-1.67	0.724	0.916	-1.06	0.737	0.977	-1.07	Cetn2	centrin 2 [Source:MGI Symbol;Acc:MGI:1347085]
ENSMUSG00000090137	0.0614	0.472	-1.9	0.296	0.982	-1.4	0.0428	0.126	-1.7	0.609	0.877	1.16	0.38	0.942	1.48	Uba52	ubiquitin A-52 residue ribosomal protein fusion product 1 [Source:MGI Symbol;Acc:MGI:98887]
ENSMUSG00000043311	0.0826	0.504	-1.37	0.364	0.991	-1.15	0.000942	0.00933	-1.67	0.869	0.963	1.02	0.77	0.98	-1.06	D17H6S53E	DNA segment, Chr 17, human D6S53E [Source:MGI Symbol;Acc:MGI:90673]
ENSMUSG00000031563	0.0614	0.472	1.33	0.479	0.992	1.1	0.138	0.278	1.22	0.539	0.844	1.08	0.347	0.939	-1.16	Wwc2	WW, C2 and coiled-coil domain containing 2 [Source:MGI Symbol;Acc:MGI:1261872]
ENSMUSG00000032536	0.107	0.536	-1.22	0.411	0.992	-1.09	3.75e-05	0.00106	-1.67	0.244	0.65	-1.13	0.132	0.917	-1.22	Trak1	trafficking protein, kinesin binding 1 [Source:MGI Symbol;Acc:MGI:1914345]
ENSMUSG00000014791	0.0614	0.472	1.51	0.00537	0.371	1.8	0.108	0.237	1.34	0.168	0.564	1.28	0.0794	0.917	1.6	Elmo3	engulfment and cell motility 3 [Source:MGI Symbol;Acc:MGI:2679007]
ENSMUSG00000035674	0.0615	0.472	-2.65	0.888	0.998	-1.07	0.0955	0.217	-2.1	0.323	0.713	-1.5	0.168	0.918	2.52	Ndufa3	NADH dehydrogenase (ubiquinone) 1 alpha subcomplex, 3 [Source:MGI Symbol;Acc:MGI:1913341]
ENSMUSG00000019732	0.0615	0.472	-1.73	0.581	0.994	-1.14	0.177	0.332	-1.38	0.936	0.983	-1.02	0.203	0.918	-1.48	Calr3	calreticulin 3 [Source:MGI Symbol;Acc:MGI:1920566]
ENSMUSG00000032727	0.0615	0.472	1.34	0.62	0.996	1.07	0.255	0.424	1.17	0.48	0.818	-1.1	0.639	0.96	1.08	Mier3	mesoderm induction early response 1, family member 3 [Source:MGI Symbol;Acc:MGI:2442317]
ENSMUSG00000024168	0.0616	0.472	-1.49	0.0427	0.694	-1.5	0.274	0.446	-1.21	0.00123	0.0633	-1.84	0.714	0.971	-1.09	Tmem204	transmembrane protein 204 [Source:MGI Symbol;Acc:MGI:3039635]
ENSMUSG00000051557	0.0616	0.472	-1.44	0.0366	0.666	-1.49	0.36	0.536	-1.17	0.669	0.896	1.07	0.348	0.939	1.25	Pusl1	pseudouridylate synthase-like 1 [Source:MGI Symbol;Acc:MGI:3047787]
[truncated: 13,239 more rows]

## Sheet: Sheet2
Supplemental Table1: Sheet2- Differentially regulated genes in M-IR-/- muscle (List sorted with M-IR-/-.FDR)
Ensembl ID	M-IR-/-.p	M-IR-/-.FDR	M-IR-/-.logFC	M-IR-/-.FC	Gene	Description
ENSMUSG00000038764	7.75e-07	0.00619	-1.11	-2.16	Ptpn3	protein tyrosine phosphatase, non-receptor type 3 [Source:MGI Symbol;Acc:MGI:105307]
ENSMUSG00000056880	1.54e-06	0.00821	-1.65	-3.14	Gadl1	glutamate decarboxylase-like 1 [Source:MGI Symbol;Acc:MGI:1920998]
ENSMUSG00000050052	2.87e-06	0.0114	-1.69	-3.22	Tdrp	testis development related protein [Source:MGI Symbol;Acc:MGI:1919398]
ENSMUSG00000046413	6.19e-06	0.0148	-3.57	-11.9	Irx3os	iroquois homeobox 3, opposite strand [Source:MGI Symbol;Acc:MGI:2441953]
ENSMUSG00000053279	6.47e-06	0.0148	-2	-4	Aldh1a1	aldehyde dehydrogenase family 1, subfamily A1 [Source:MGI Symbol;Acc:MGI:1353450]
ENSMUSG00000020623	6.24e-06	0.0148	-1.66	-3.16	Map2k6	mitogen-activated protein kinase kinase 6 [Source:MGI Symbol;Acc:MGI:1346870]
ENSMUSG00000026888	9.08e-06	0.0181	-2.03	-4.09	Grb14	growth factor receptor bound protein 14 [Source:MGI Symbol;Acc:MGI:1355324]
ENSMUSG00000024105	1.2e-05	0.0207	-4.26	-19.2	Themis3	thymocyte selection associated family member 3 [Source:MGI Symbol;Acc:MGI:1921806]
ENSMUSG00000026156	1.4e-05	0.0207	3.26	9.58	B3gat2	beta-1,3-glucuronyltransferase 2 (glucuronosyltransferase S) [Source:MGI Symbol;Acc:MGI:2389490]
ENSMUSG00000036304	1.91e-05	0.0226	-2.43	-5.4	Zdhhc23	zinc finger, DHHC domain containing 23 [Source:MGI Symbol;Acc:MGI:2685625]
ENSMUSG00000015312	1.99e-05	0.0226	-2.36	-5.12	Gadd45b	growth arrest and DNA-damage-inducible 45 beta [Source:MGI Symbol;Acc:MGI:107776]
ENSMUSG00000036006	1.84e-05	0.0226	-1.16	-2.24	Fam65b	family with sequence similarity 65, member B [Source:MGI Symbol;Acc:MGI:2444879]
ENSMUSG00000040046	2.19e-05	0.0233	-2	-4	Tph1	tryptophan hydroxylase 1 [Source:MGI Symbol;Acc:MGI:98796]
ENSMUSG00000086605	2.8e-05	0.0265	-1.36	-2.57	Gm14290	predicted gene 14290 [Source:MGI Symbol;Acc:MGI:3649702]
ENSMUSG00000039601	2.98e-05	0.0265	-1.03	-2.04	Rcan2	regulator of calcineurin 2 [Source:MGI Symbol;Acc:MGI:1858219]
ENSMUSG00000041143	2.98e-05	0.0265	1.38	2.61	Tmco4	transmembrane and coiled-coil domains 4 [Source:MGI Symbol;Acc:MGI:1924306]
ENSMUSG00000063953	3.49e-05	0.0291	-2.27	-4.82	Amd2	S-adenosylmethionine decarboxylase 2 [Source:MGI Symbol;Acc:MGI:1333111]
ENSMUSG00000027293	3.65e-05	0.0291	1.31	2.49	Ehd4	EH-domain containing 4 [Source:MGI Symbol;Acc:MGI:1919619]
ENSMUSG00000050556	4.25e-05	0.0323	-1.23	-2.35	Kcnb1	potassium voltage gated channel, Shab-related subfamily, member 1 [Source:MGI Symbol;Acc:MGI:96666]
ENSMUSG00000045246	4.6e-05	0.0328	-2.23	-4.69	Kcng4	potassium voltage-gated channel, subfamily G, member 4 [Source:MGI Symbol;Acc:MGI:1913983]
ENSMUSG00000054477	4.72e-05	0.0328	-2.04	-4.1	Kcnn2	potassium intermediate/small conductance calcium-activated channel, subfamily N, member 2 [Source:MGI Symbol;Acc:MGI:2153182]
ENSMUSG00000060477	5.66e-05	0.0377	1.38	2.6	Irak2	interleukin-1 receptor-associated kinase 2 [Source:MGI Symbol;Acc:MGI:2429603]
ENSMUSG00000061877	7.23e-05	0.0462	-3.5	-11.3	BC048679	cDNA sequence BC048679 [Source:MGI Symbol;Acc:MGI:3510776]

## Sheet: Sheet3
Supplemental Table1: Sheet 3- Differentially regulated genes in M-IGF-1R-/- muscle (List sorted with M-IGF1R-/-. FDR)
Ensembl ID	M-IGF1R-/-.p	M-IGF1R-/-.FDR	M-IGF1R-/-.logFC	M-IGF1R-/-.FC	Gene	Description
ENSMUSG00000036006	3.88e-09	4.1e-05	-1.82	-3.53	Fam65b	family with sequence similarity 65, member B [Source:MGI Symbol;Acc:MGI:2444879]
ENSMUSG00000102329	5.13e-09	4.1e-05	3.92	15.2	Gm10851	predicted gene 10851 [Source:MGI Symbol;Acc:MGI:3641824]
ENSMUSG00000102376	4.08e-08	0.000217	2.71	6.53	Gm37975	predicted gene, 37975 [Source:MGI Symbol;Acc:MGI:5611203]
ENSMUSG00000037953	2.35e-07	0.000937	3.93	15.2	A4gnt	alpha-1,4-N-acetylglucosaminyltransferase [Source:MGI Symbol;Acc:MGI:2143261]
ENSMUSG00000020668	2.24e-06	0.00714	-1.06	-2.08	Kif3c	kinesin family member 3C [Source:MGI Symbol;Acc:MGI:107979]
ENSMUSG00000043531	2.91e-06	0.00774	-2.2	-4.61	Sorcs1	sortilin-related VPS10 domain containing receptor 1 [Source:MGI Symbol;Acc:MGI:1929666]
ENSMUSG00000023033	9.72e-06	0.0178	3.16	8.93	Scn8a	sodium channel, voltage-gated, type VIII, alpha [Source:MGI Symbol;Acc:MGI:103169]
ENSMUSG00000038481	9.16e-06	0.0178	-1.1	-2.15	Cdk19	cyclin-dependent kinase 19 [Source:MGI Symbol;Acc:MGI:1925584]
ENSMUSG00000028836	1e-05	0.0178	-1.74	-3.34	Slc30a2	solute carrier family 30 (zinc transporter), member 2 [Source:MGI Symbol;Acc:MGI:106637]
ENSMUSG00000022432	1.48e-05	0.0228	3.19	9.11	Smc1b	structural maintenance of chromosomes 1B [Source:MGI Symbol;Acc:MGI:2154049]
ENSMUSG00000052373	3.51e-05	0.0467	1.1	2.14	Mpp3	membrane protein, palmitoylated 3 (MAGUK p55 subfamily member 3) [Source:MGI Symbol;Acc:MGI:1328354]

## Sheet: Sheet4
Supplemental Table1: Sheet 4- Differentially regulated genes in MIGIRKO muscle (List sorted with MIGIRKO. FDR)
Ensembl ID	MIGIRKO.p	MIGIRKO.FDR	MIGIRKO.logFC	MIGIRKO.FC	Gene	Description
ENSMUSG00000020623	7.03e-12	3.74e-08	-2.8	-6.98	Map2k6	mitogen-activated protein kinase kinase 6 [Source:MGI Symbol;Acc:MGI:1346870]
ENSMUSG00000038764	3.58e-12	3.74e-08	-1.66	-3.17	Ptpn3	protein tyrosine phosphatase, non-receptor type 3 [Source:MGI Symbol;Acc:MGI:105307]
ENSMUSG00000028836	6.38e-12	3.74e-08	-3.7	-13	Slc30a2	solute carrier family 30 (zinc transporter), member 2 [Source:MGI Symbol;Acc:MGI:106637]
ENSMUSG00000048939	1.11e-11	4.44e-08	-2.79	-6.92	Atp13a5	ATPase type 13A5 [Source:MGI Symbol;Acc:MGI:2444068]
ENSMUSG00000050556	1.08e-10	2.88e-07	-2.14	-4.41	Kcnb1	potassium voltage gated channel, Shab-related subfamily, member 1 [Source:MGI Symbol;Acc:MGI:96666]
ENSMUSG00000020668	1.07e-10	2.88e-07	-1.68	-3.2	Kif3c	kinesin family member 3C [Source:MGI Symbol;Acc:MGI:107979]
ENSMUSG00000029685	2.03e-10	2.96e-07	-2.46	-5.5	Asb15	ankyrin repeat and SOCS box-containing 15 [Source:MGI Symbol;Acc:MGI:1926160]
ENSMUSG00000021200	2.04e-10	2.96e-07	-2.38	-5.2	Asb2	ankyrin repeat and SOCS box-containing 2 [Source:MGI Symbol;Acc:MGI:1929743]
ENSMUSG00000027293	1.69e-10	2.96e-07	2.16	4.48	Ehd4	EH-domain containing 4 [Source:MGI Symbol;Acc:MGI:1919619]
ENSMUSG00000030956	1.43e-10	2.96e-07	-1.2	-2.29	Fam53b	family with sequence similarity 53, member B [Source:MGI Symbol;Acc:MGI:1925188]
ENSMUSG00000025790	1.65e-10	2.96e-07	-1.76	-3.38	Slco3a1	solute carrier organic anion transporter family, member 3a1 [Source:MGI Symbol;Acc:MGI:1351867]
ENSMUSG00000053279	2.26e-10	3e-07	-2.94	-7.67	Aldh1a1	aldehyde dehydrogenase family 1, subfamily A1 [Source:MGI Symbol;Acc:MGI:1353450]
ENSMUSG00000026888	3.52e-10	4.32e-07	-3.17	-9	Grb14	growth factor receptor bound protein 14 [Source:MGI Symbol;Acc:MGI:1355324]
ENSMUSG00000103460	7.72e-10	8.8e-07	-3.65	-12.5	Gm18491	predicted gene, 18491 [Source:MGI Symbol;Acc:MGI:5010676]
ENSMUSG00000045246	1.02e-09	1.08e-06	-3.82	-14.1	Kcng4	potassium voltage-gated channel, subfamily G, member 4 [Source:MGI Symbol;Acc:MGI:1913983]
ENSMUSG00000037742	1.23e-09	1.23e-06	2.3	4.93	Eef1a1	eukaryotic translation elongation factor 1 alpha 1 [Source:MGI Symbol;Acc:MGI:1096881]
ENSMUSG00000075232	1.83e-09	1.6e-06	-3.99	-15.9	Amd1	S-adenosylmethionine decarboxylase 1 [Source:MGI Symbol;Acc:MGI:88004]
ENSMUSG00000026147	1.82e-09	1.6e-06	-5.3	-39.3	Col9a1	collagen, type IX, alpha 1 [Source:MGI Symbol;Acc:MGI:88465]
ENSMUSG00000021556	2.11e-09	1.6e-06	-2.11	-4.32	Golm1	golgi membrane protein 1 [Source:MGI Symbol;Acc:MGI:1917329]
ENSMUSG00000022629	2.03e-09	1.6e-06	-2.03	-4.1	Kif21a	kinesin family member 21A [Source:MGI Symbol;Acc:MGI:109188]
ENSMUSG00000026380	1.99e-09	1.6e-06	-3.9	-15	Tfcp2l1	transcription factor CP2-like 1 [Source:MGI Symbol;Acc:MGI:2444691]
ENSMUSG00000063953	3.25e-09	2.32e-06	-3.68	-12.8	Amd2	S-adenosylmethionine decarboxylase 2 [Source:MGI Symbol;Acc:MGI:1333111]
ENSMUSG00000042734	3.35e-09	2.32e-06	3.12	8.67	Ttc9	tetratricopeptide repeat domain 9 [Source:MGI Symbol;Acc:MGI:1916730]
ENSMUSG00000073418	3.61e-09	2.4e-06	2.53	5.79	C4b	complement component 4B (Chido blood group) [Source:MGI Symbol;Acc:MGI:88228]
ENSMUSG00000043683	4.32e-09	2.76e-06	-1.29	-2.45	Fem1a	feminization 1 homolog a (C. elegans) [Source:MGI Symbol;Acc:MGI:1335089]
ENSMUSG00000031137	4.64e-09	2.85e-06	-2.19	-4.55	Fgf13	fibroblast growth factor 13 [Source:MGI Symbol;Acc:MGI:109178]
ENSMUSG00000022525	5.17e-09	2.95e-06	-2.66	-6.32	Hrasls	HRAS-like suppressor [Source:MGI Symbol;Acc:MGI:1351473]
ENSMUSG00000045667	5.02e-09	2.95e-06	-2.35	-5.09	Smtnl2	smoothelin-like 2 [Source:MGI Symbol;Acc:MGI:2442764]
ENSMUSG00000007617	7.2e-09	3.59e-06	-1.56	-2.95	Homer1	homer homolog 1 (Drosophila) [Source:MGI Symbol;Acc:MGI:1347345]
ENSMUSG00000015745	7.18e-09	3.59e-06	2.77	6.84	Plekho1	pleckstrin homology domain containing, family O member 1 [Source:MGI Symbol;Acc:MGI:1914470]
ENSMUSG00000015843	7.09e-09	3.59e-06	-2.9	-7.46	Rxrg	retinoid X receptor gamma [Source:MGI Symbol;Acc:MGI:98216]
ENSMUSG00000084883	8.11e-09	3.7e-06	-2.51	-5.7	Ccdc85c	coiled-coil domain containing 85C [Source:MGI Symbol;Acc:MGI:3644008]
ENSMUSG00000038481	8.1e-09	3.7e-06	-1.62	-3.08	Cdk19	cyclin-dependent kinase 19 [Source:MGI Symbol;Acc:MGI:1925584]
ENSMUSG00000032114	7.98e-09	3.7e-06	-2.25	-4.77	Slc37a4	solute carrier family 37 (glucose-6-phosphate transporter), member 4 [Source:MGI Symbol;Acc:MGI:1316650]
ENSMUSG00000038204	9.03e-09	4.01e-06	-2.89	-7.4	Asb10	ankyrin repeat and SOCS box-containing 10 [Source:MGI Symbol;Acc:MGI:2152836]
ENSMUSG00000085888	9.89e-09	4.27e-06	-3.31	-9.9	Gm12224	predicted gene 12224 [Source:MGI Symbol;Acc:MGI:3651369]
ENSMUSG00000085014	1.09e-08	4.57e-06	-5.03	-32.6	Gm13490	predicted gene 13490 [Source:MGI Symbol;Acc:MGI:3650821]
ENSMUSG00000054978	1.22e-08	5.01e-06	-2.31	-4.94	Kbtbd13	kelch repeat and BTB (POZ) domain containing 13 [Source:MGI Symbol;Acc:MGI:1921742]
ENSMUSG00000006435	1.29e-08	5.01e-06	-1.3	-2.46	Neurl1a	neuralized E3 ubiquitin protein ligase 1A [Source:MGI Symbol;Acc:MGI:1334263]
ENSMUSG00000044378	1.38e-08	5.01e-06	-7.52	-184	Slc15a5	solute carrier family 15, member 5 [Source:MGI Symbol;Acc:MGI:3607714]
ENSMUSG00000027010	1.33e-08	5.01e-06	-1.48	-2.79	Slc25a12	solute carrier family 25 (mitochondrial carrier, Aralar), member 12 [Source:MGI Symbol;Acc:MGI:1926080]
ENSMUSG00000026469	1.33e-08	5.01e-06	-2.06	-4.17	Xpr1	xenotropic and polytropic retrovirus receptor 1 [Source:MGI Symbol;Acc:MGI:97932]
ENSMUSG00000020546	1.63e-08	5.66e-06	-1.94	-3.82	Stxbp4	syntaxin binding protein 4 [Source:MGI Symbol;Acc:MGI:1342296]
ENSMUSG00000047746	1.72e-08	5.72e-06	-1.57	-2.98	Fbxo40	F-box protein 40 [Source:MGI Symbol;Acc:MGI:2443753]
ENSMUSG00000027457	1.72e-08	5.72e-06	-2.81	-7.01	Snph	syntaphilin [Source:MGI Symbol;Acc:MGI:2139270]
ENSMUSG00000033590	1.84e-08	6.01e-06	-1.76	-3.38	Myo5c	myosin VC [Source:MGI Symbol;Acc:MGI:2442485]
ENSMUSG00000036825	2.29e-08	7.32e-06	-1.47	-2.76	Ssx2ip	synovial sarcoma, X breakpoint 2 interacting protein [Source:MGI Symbol;Acc:MGI:2139150]
ENSMUSG00000008393	2.55e-08	7.75e-06	1.63	3.1	Carhsp1	calcium regulated heat stable protein 1 [Source:MGI Symbol;Acc:MGI:1196368]
ENSMUSG00000038663	2.57e-08	7.75e-06	-1.31	-2.48	Fsd2	fibronectin type III and SPRY domain containing 2 [Source:MGI Symbol;Acc:MGI:2444310]
ENSMUSG00000030451	2.56e-08	7.75e-06	-1.75	-3.37	Herc2	hect (homologous to the E6-AP (UBE3A) carboxyl terminus) domain and RCC1 (CHC1)-like domain (RLD) 2 [Source:MGI Symbol;Acc:MGI:103234]
ENSMUSG00000025586	2.97e-08	8.31e-06	-1.5	-2.82	Cpeb1	cytoplasmic polyadenylation element binding protein 1 [Source:MGI Symbol;Acc:MGI:108442]
ENSMUSG00000026170	2.97e-08	8.31e-06	-1.75	-3.35	Cyp27a1	cytochrome P450, family 27, subfamily a, polypeptide 1 [Source:MGI Symbol;Acc:MGI:88594]
ENSMUSG00000060477	2.97e-08	8.31e-06	1.84	3.59	Irak2	interleukin-1 receptor-associated kinase 2 [Source:MGI Symbol;Acc:MGI:2429603]
ENSMUSG00000038028	2.87e-08	8.31e-06	-1.93	-3.8	Tigar	Trp53 induced glycolysis repulatory phosphatase [Source:MGI Symbol;Acc:MGI:2442752]
ENSMUSG00000038244	3.13e-08	8.61e-06	-1.3	-2.46	Mical2	microtubule associated monooxygenase, calponin and LIM domain containing 2 [Source:MGI Symbol;Acc:MGI:2444947]
ENSMUSG00000020333	3.34e-08	8.88e-06	-2.35	-5.11	Acsl6	acyl-CoA synthetase long-chain family member 6 [Source:MGI Symbol;Acc:MGI:894291]
ENSMUSG00000005981	3.32e-08	8.88e-06	-0.935	-1.91	Trap1	TNF receptor-associated protein 1 [Source:MGI Symbol;Acc:MGI:1915265]
ENSMUSG00000025993	3.53e-08	9.23e-06	-2.65	-6.26	Slc40a1	solute carrier family 40 (iron-regulated transporter), member 1 [Source:MGI Symbol;Acc:MGI:1315204]
ENSMUSG00000039899	3.65e-08	9.25e-06	2.48	5.59	Fgl2	fibrinogen-like protein 2 [Source:MGI Symbol;Acc:MGI:103266]
ENSMUSG00000027547	3.62e-08	9.25e-06	-3.76	-13.5	Sall4	sal-like 4 (Drosophila) [Source:MGI Symbol;Acc:MGI:2139360]
ENSMUSG00000032033	4.49e-08	1.05e-05	-4.27	-19.3	Barx2	BarH-like homeobox 2 [Source:MGI Symbol;Acc:MGI:109617]
ENSMUSG00000073375	4.43e-08	1.05e-05	-2.12	-4.35	Lrrc30	leucine rich repeat containing 30 [Source:MGI Symbol;Acc:MGI:2685172]
ENSMUSG00000019933	4.49e-08	1.05e-05	-2.51	-5.7	Mrln	myoregulin [Source:MGI Symbol;Acc:MGI:1916813]
ENSMUSG00000026100	4.48e-08	1.05e-05	-2.95	-7.74	Mstn	myostatin [Source:MGI Symbol;Acc:MGI:95691]
ENSMUSG00000032180	4.44e-08	1.05e-05	-1.15	-2.23	Tmed1	transmembrane emp24 domain containing 1 [Source:MGI Symbol;Acc:MGI:106201]
ENSMUSG00000023965	5.02e-08	1.16e-05	-1.09	-2.13	Fbxl17	F-box and leucine-rich repeat protein 17 [Source:MGI Symbol;Acc:MGI:1354704]
ENSMUSG00000025656	5.19e-08	1.18e-05	-1.81	-3.51	Arhgef9	CDC42 guanine nucleotide exchange factor (GEF) 9 [Source:MGI Symbol;Acc:MGI:2442233]
ENSMUSG00000002265	5.28e-08	1.18e-05	2.52	5.75	Peg3	paternally expressed 3 [Source:MGI Symbol;Acc:MGI:104748]
ENSMUSG00000038059	5.34e-08	1.18e-05	3.83	14.2	Smim3	small integral membrane protein 3 [Source:MGI Symbol;Acc:MGI:1917088]
ENSMUSG00000037242	5.54e-08	1.19e-05	1.61	3.06	Clic4	chloride intracellular channel 4 (mitochondrial) [Source:MGI Symbol;Acc:MGI:1352754]
ENSMUSG00000026027	5.5e-08	1.19e-05	-1.48	-2.78	Stradb	STE20-related kinase adaptor beta [Source:MGI Symbol;Acc:MGI:2144047]
ENSMUSG00000056880	5.78e-08	1.23e-05	-1.79	-3.47	Gadl1	glutamate decarboxylase-like 1 [Source:MGI Symbol;Acc:MGI:1920998]
ENSMUSG00000060843	6.08e-08	1.28e-05	-2.66	-6.33	Ctnna3	catenin (cadherin associated protein), alpha 3 [Source:MGI Symbol;Acc:MGI:2661445]
ENSMUSG00000069094	6.35e-08	1.32e-05	-1.94	-3.84	Pde7a	phosphodiesterase 7A [Source:MGI Symbol;Acc:MGI:1202402]
ENSMUSG00000039601	6.71e-08	1.37e-05	-1.3	-2.46	Rcan2	regulator of calcineurin 2 [Source:MGI Symbol;Acc:MGI:1858219]
ENSMUSG00000037151	6.91e-08	1.4e-05	-1.51	-2.84	Lrrc20	leucine rich repeat containing 20 [Source:MGI Symbol;Acc:MGI:2387182]
ENSMUSG00000056367	7.49e-08	1.43e-05	-4.21	-18.5	Actr3b	ARP3 actin-related protein 3B [Source:MGI Symbol;Acc:MGI:2661120]
ENSMUSG00000042254	7.61e-08	1.43e-05	2.35	5.11	Cilp	cartilage intermediate layer protein, nucleotide pyrophosphohydrolase [Source:MGI Symbol;Acc:MGI:2444507]
ENSMUSG00000003518	7.14e-08	1.43e-05	-0.913	-1.88	Dusp3	dual specificity phosphatase 3 (vaccinia virus phosphatase VH1-related) [Source:MGI Symbol;Acc:MGI:1919599]
ENSMUSG00000040430	7.33e-08	1.43e-05	-1.71	-3.28	Pitpnc1	phosphatidylinositol transfer protein, cytoplasmic 1 [Source:MGI Symbol;Acc:MGI:1919045]
ENSMUSG00000022464	7.3e-08	1.43e-05	-1.31	-2.48	Slc38a4	solute carrier family 38, member 4 [Source:MGI Symbol;Acc:MGI:1916604]
ENSMUSG00000041736	7.61e-08	1.43e-05	1.9	3.73	Tspo	translocator protein [Source:MGI Symbol;Acc:MGI:88222]
ENSMUSG00000030515	7.77e-08	1.44e-05	-1.14	-2.21	Tarsl2	threonyl-tRNA synthetase-like 2 [Source:MGI Symbol;Acc:MGI:2444486]
ENSMUSG00000036611	7.92e-08	1.45e-05	-2.48	-5.57	Eepd1	endonuclease/exonuclease/phosphatase family domain containing 1 [Source:MGI Symbol;Acc:MGI:1914734]
ENSMUSG00000031109	8.26e-08	1.49e-05	-2.14	-4.42	Enox2	ecto-NOX disulfide-thiol exchanger 2 [Source:MGI Symbol;Acc:MGI:2384799]
ENSMUSG00000030553	8.35e-08	1.49e-05	3.56	11.8	Pgpep1l	pyroglutamyl-peptidase I-like [Source:MGI Symbol;Acc:MGI:1925694]
ENSMUSG00000024134	8.42e-08	1.49e-05	-2.3	-4.92	Six2	sine oculis-related homeobox 2 [Source:MGI Symbol;Acc:MGI:102778]
ENSMUSG00000045912	8.57e-08	1.5e-05	-3.94	-15.3	C2cd4c	C2 calcium-dependent domain containing 4C [Source:MGI Symbol;Acc:MGI:2685084]
ENSMUSG00000020629	9.65e-08	1.67e-05	-1.2	-2.3	Adi1	acireductone dioxygenase 1 [Source:MGI Symbol;Acc:MGI:2144929]
ENSMUSG00000048583	9.7e-08	1.67e-05	4.22	18.6	Igf2	insulin-like growth factor 2 [Source:MGI Symbol;Acc:MGI:96434]
ENSMUSG00000050052	1.07e-07	1.81e-05	-1.86	-3.64	Tdrp	testis development related protein [Source:MGI Symbol;Acc:MGI:1919398]
ENSMUSG00000030126	1.09e-07	1.83e-05	-0.992	-1.99	Tmcc1	transmembrane and coiled coil domains 1 [Source:MGI Symbol;Acc:MGI:2442368]
ENSMUSG00000001334	1.22e-07	1.96e-05	-1.62	-3.07	Fndc5	fibronectin type III domain containing 5 [Source:MGI Symbol;Acc:MGI:1917614]
ENSMUSG00000051236	1.19e-07	1.96e-05	-1.69	-3.24	Msrb3	methionine sulfoxide reductase B3 [Source:MGI Symbol;Acc:MGI:2443538]
ENSMUSG00000027784	1.22e-07	1.96e-05	-1.73	-3.33	Ppm1l	protein phosphatase 1 (formerly 2C)-like [Source:MGI Symbol;Acc:MGI:2139740]
ENSMUSG00000029994	1.36e-07	2.14e-05	1.7	3.24	Anxa4	annexin A4 [Source:MGI Symbol;Acc:MGI:88030]
ENSMUSG00000027895	1.35e-07	2.14e-05	-1.68	-3.21	Kcnc4	potassium voltage gated channel, Shaw-related subfamily, member 4 [Source:MGI Symbol;Acc:MGI:96670]
ENSMUSG00000021815	1.35e-07	2.14e-05	-4.83	-28.5	Mss51	MSS51 mitochondrial translational activator [Source:MGI Symbol;Acc:MGI:1922093]
ENSMUSG00000023460	1.47e-07	2.26e-05	-1.17	-2.26	Rab12	RAB12, member RAS oncogene family [Source:MGI Symbol;Acc:MGI:894284]
ENSMUSG00000027107	1.52e-07	2.3e-05	3.32	10	Chrna1	cholinergic receptor, nicotinic, alpha polypeptide 1 (muscle) [Source:MGI Symbol;Acc:MGI:87885]
ENSMUSG00000044951	1.53e-07	2.3e-05	-2.86	-7.28	Mylk4	myosin light chain kinase family, member 4 [Source:MGI Symbol;Acc:MGI:3643758]
[truncated: 3,000 more rows]

## Sheet: Sheet5
Supplemental Table1: Sheet 5- Differentially regulated genes in M-FoxO TKO muscle (List sorted with M-FoxO TKO. FDR)
[truncated: 229 more rows]

[truncated: 2 more sheets: Sheet6, Sheet7]
